# Supplementary material for: Caenorhabditis elegans methionine/S-adenosylmethionine cycle activity is sensed and adjusted by a nuclear hormone receptor
Source: eLife. 2020 Oct 5;9:e60259. doi: 10.7554/eLife.60259 (PMC7561351; doi:10.7554/eLife.60259)
Supplement: Supplementary file 1. — Wild type on vitamin B12 vs.wild type on untreated; wild type on vitamin B12 and propionate vs. wild type on vitamin B12; ∆nhr-10 untreated vs. wild type untreated; ∆nhr-10 on vitamin B12 vs. ∆nhr-10 untreated; ∆nhr-68 untreated vs. wild type untreated; ∆nhr-68 on vitamin B12 vs. ∆nhr-68 untreated. This table is a subset of data published in Bulcha et al., 2019 (GSE123507). Related to Figures 1, 3, 5 and 6. [file elife-60259-supp1.xlsx]

## Sheet: Sheet1
Gene	Wild type(N2) vitamin B12 vs. untreated		Wild type(N2) propionate/vitamin B12 vs. wild type(N2) vitamin B12		∆nhr-10 untreated vs. wild type(N2) untreated		∆nhr-10 vitamin B12 vs. ∆nhr-10 untreated		∆nhr-68 untreated vs. wild type(N2) untreated		∆nhr-68 vitamin B12 vs. ∆nhr-68 untreated
	Fold Change	P adjusted	Fold Change	P adjusted	Fold Change	P adjusted	Fold Change	P adjusted	Fold Change	P adjusted	Fold Change	P adjusted
acdh-1	0.0420581	0	17.8905	0	0.183832	0	0.000436131	0	0.0960766	0	0.00183673	0
ech-6	0.237296	3.41746e-06	4.61993	0	0.318308	2.86596e-05	0.370209	9.65894e-15	0.321231	9.81668e-06	0.400901	0
hach-1	0.267788	0.0014213	6.51363	0	0.201215	7.47185e-07	0.940677	0.990325	0.555439	0.534018	0.329518	0
hphd-1	0.22481	2.9976e-15	4.42307	0	0.16456	0	0.263482	1.50673e-08	0.220441	0	0.230306	0
alh-8	0.675777	2.34268e-07	1.7834	0	0.375641	0	1.32693	0.0551953	0.871178	0	0.834382	0
metr-1	0.245372	0	0.871926	0.00432447	1.38164	0.989053	0.149859	1.37861e-06	1.0817	0.990772	0.226116	0
mtrr-1	0.181529	0	1.37226	0.195132	1.02636	0.994725	0.174188	0	0.632715	0.0213082	0.287987	8.68972e-13
sams-1	0.863309	0.998097	0.30818	0.000270028	1.04593	0.995576	0.647787	0	1.21028	0.924653	0.638967	0.000265693
ahcy-1	0.455261	0	1.03972	0.997647	0.990831	0.998355	0.40948	0	1.11839	0.00257066	0.424218	0
mel-32	0.61706	0.0365446	0.889237	0.00201819	1.00778	0.997199	0.457128	2.60814e-11	0.762453	0.696302	0.625305	0
mthf-1	0.452404	1.69985e-06	0.832925	0.839223	1.54473	0.00016958	0.288326	0	1.03057	0.991684	0.410565	0
pmt-2	0.512741	4.50172e-06	1.00018	0.994827	1.00674	0.997245	0.51052	2.36845e-08	0.921672	0.993209	0.628007	1.18846e-07
msra-1	0.124691	0.000199759	0.778789	0.672655	1.74009	0.98927	0.034263	1.27797e-09	0.817139	0.994185	0.0616221	0
pmp-5	0.176404	0	2.88222	0.000107615	0.610238	0.00768271	0.143939	5.77949e-12	0.501016	0	0.201604	0
cbs-1	4.54323	0	0.339907	0	1.54914	0.0153392	4.33566	0.210294	1.32351	0.812154	3.85662	0
nhr-114	0.28374	0	0.712054	0.969207	0.826755	0.976318	0.199895	5.72581e-11	0.65187	1.13243e-14	0.227068	0
