# Supplementary material for: Caenorhabditis elegans methionine/S-adenosylmethionine cycle activity is sensed and adjusted by a nuclear hormone receptor
Source: eLife. 2020 Oct 5;9:e60259. doi: 10.7554/eLife.60259 (PMC7561351; doi:10.7554/eLife.60259)
Supplement: Supplementary file 2. — Genes that change in all four mutant strains are shown in tab 1, while all genes regardless of p adjusted value are shown in tab 2. Related to Figures 3 and 6. [file elife-60259-supp2.xlsx]

## Sheet: Fig3A_Padj < 0.01
Gene	Pacdh-1::GFP;∆nhr-10; mthf-1(ww50) Fold Change	Pacdh-1::GFP;∆nhr-10; sams-1(ww51) Fold Change	Pacdh-1::GFP;∆nhr-10; metr-1(ww52) Fold Change	Pacdh-1::GFP;∆nhr-10; mtrr-1(ww56) Fold Change
acdh-1	4498.9	706.719	3335.87	2516.36
clec-47	861.271	17.642	349.527	280.717
Y34F4.2	30.4445	34.426	27.6907	33.0935
lipl-3	28.8631	25.8281	13.5884	30.875
T14B4.19	28.4388	174.836	18.1642	138.262
srh-237	26.371	27.4822	18.4687	25.7213
msra-1	23.8265	13.1531	17.0423	18.0314
lpr-3	23.2944	154.849	18.1984	95.9901
dpy-10	20.3788	113.919	14.9585	80.6568
ZC434.10	20.2687	80.8843	27.5655	76.3391
dpy-7	17.9205	94.5235	15.6754	69.0824
Y37A1B.7	16.9541	77.8918	23.9365	63.7312
lpr-5	16.9463	102.563	15.5013	65.7201
lys-5	16.2106	6.75613	14.0844	8.51455
Y43D4A.5	15.793	66.8903	19.4537	49.8152
noah-2	15.2697	87.979	16.9755	56.4185
DH11.2	14.7233	9.49123	14.1888	12.8545
wrt-2	14.1605	61.6265	16.5111	44.2997
R07E3.6	13.7048	68.3521	17.067	51.1085
Y54G2A.76	13.7016	60.5921	15.5263	49.7679
sym-1	13.6047	99.35	9.17891	58.6549
dpy-2	13.5462	75.1608	10.4039	53.6158
K08B12.1	13.42	56.992	16.4532	49.6461
noah-1	13.4045	86.1651	13.605	55.438
mlt-11	12.8983	86.1658	13.302	47.3589
dpy-9	12.6332	69.7786	9.84988	56.6828
pmp-5	11.8803	8.31127	10.8845	8.47237
osm-8	11.5742	45.1826	15.6883	40.6702
T17H7.1	11.3737	55.9936	14.5501	33.4275
wrt-1	11.244	40.1751	16.9107	37.4167
Y73E7A.8	10.9809	64.1733	11.0335	41.4223
F44A6.5	10.9413	8.13156	12.9037	9.2436
cdh-12	10.8163	48.5175	14.3217	35.5154
wrt-10	10.4169	73.9416	6.29197	50.5709
lpr-6	10.386	59.5405	8.7174	40.621
Y39B6A.1	9.97918	12.1784	9.96893	9.33434
C14A4.9	9.9766	30.3252	14.3838	31.9856
F23H12.5	9.90848	42.8818	10.4686	31.6176
Y65B4BM.3	9.78522	33.099	13.6807	25.146
T06G6.6	9.66566	32.6762	12.4859	34.6561
F21C10.9	9.17244	8.08707	6.58827	9.94796
F18C5.5	9.07722	26.6141	14.1825	27.6034
osr-1	9.00746	36.6655	13.4172	33.0414
lys-6	8.62681	3.98618	4.70239	6.47269
bli-1	8.61489	32.8127	12.5403	27.8196
metr-1	8.52245	6.98196	8.44068	7.06171
T05E12.6	8.21382	8.47386	5.75293	8.31539
F09F9.2	8.08766	25.7125	12.8241	27.1814
nhr-68	8.05247	8.16129	8.19991	7.4191
F30A10.2	8.04356	16.148	10.6739	20.2183
F35D2.1	8.01703	28.3348	11.5294	22.0305
H03E18.1	8.00093	30.721	10.0425	25.2913
T26C5.2	7.86371	36.598	9.30822	28.3018
F54B11.11	7.83706	6.06631	6.76739	5.30129
H42K12.3	7.59671	20.7906	9.46101	18.5548
lys-4	7.38887	5.92164	7.10581	6.87678
dao-2	7.38685	40.4562	7.69003	30.0371
C01F1.5	7.25618	32.0992	9.65098	27.7243
F59B10.5	7.14901	31.5329	6.27994	26.0191
Y65B4BL.1	7.13997	15.6058	7.94959	14.3124
nhr-114	7.10605	3.16406	5.97596	3.56422
F58H1.2	7.02387	21.7129	8.48997	21.8693
fbxa-72	6.97627	6.3941	4.61245	9.21108
let-4	6.95565	35.8889	5.65772	24.4345
grl-15	6.92613	17.2826	9.8191	16.8587
C11H1.5	6.92381	24.0959	7.69771	16.8885
ZC434.3	6.77093	10.8076	8.49082	13.2504
mtrr-1	6.66305	4.99306	6.08646	5.23889
fat-5	6.45403	16.9577	8.7216	6.7269
mltn-9	6.41666	40.8207	5.77034	27.8258
K02E10.4	6.40568	19.653	6.26592	14.5387
K08E7.5	6.40004	17.5346	9.61595	14.7332
Y102A11A.5	6.25802	22.2614	8.27988	19.1756
Y39A1A.9	5.88788	20.0806	5.76515	15.226
ZC123.1	5.85947	12.2814	7.96052	11.9504
glf-1	5.76769	14.9572	7.60474	14.3832
asp-13	5.65519	7.49181	8.08504	10.097
qua-1	5.63105	15.352	7.5996	13.4265
F33D4.6	5.62487	11.3124	7.20109	10.9958
nhr-156	5.45406	4.36648	4.76612	6.7735
mlt-9	5.40196	12.2656	6.81394	11.1459
clec-180	5.30199	23.3002	5.9076	18.2773
sams-1	5.3007	9.38081	5.36188	6.08201
nas-37	5.21373	16.2846	6.75313	16.3761
F17H10.1	4.99945	5.94141	4.84589	5.38503
tts-1	4.96318	8.64123	8.53979	8.81952
sups-1	4.91464	13.083	6.67627	11.8857
C28C12.4	4.82627	21.9397	5.65461	11.5728
rnf-145	4.78883	4.18784	4.32565	4.41667
grl-10	4.60376	8.34794	6.1024	8.56248
F18F11.4	4.52472	6.6451	4.98111	7.27224
mthf-1	4.29902	5.36961	4.41184	4.39566
T27A10.6	4.24886	10.5662	4.39908	9.19379
C02F4.4	4.20449	8.4716	4.93695	8.00079
Y54F10AM.6	4.18467	20.0353	4.81825	16.9282
lgc-22	3.87573	6.77216	4.89678	6.66021
rhy-1	3.64537	5.35742	3.31905	3.37821
mmaa-1	3.61679	2.49012	3.08276	2.57271
Y55F3AM.14	3.49407	5.9694	4.04365	6.38943
cpr-4	3.37278	8.97623	2.83465	6.04821
pmt-2	3.35915	3.85767	2.88873	3.47313
C30B5.6	3.34518	9.1749	4.68028	7.8209
ent-7	3.09063	3.28938	2.6262	3.07358
F53B3.6	2.84743	10.3724	3.22874	7.62279
papl-1	2.71383	3.46814	1.92192	2.89331
hphd-1	2.5959	2.82586	2.50551	2.73851
ech-6	2.41066	2.16706	2.0303	2.32029
fat-2	2.08262	3.43551	2.05809	3.04073
W02H5.8	1.89173	2.2602	2.23673	2.25023
srr-4	1.86259	1.80254	1.71955	2.30158
C07D8.6	0.466662	0.504546	0.510211	0.529895
dct-17	0.37394	0.373646	0.212856	0.286987
pho-9	0.319156	0.365521	0.356631	0.472362
F49C12.7	0.253963	0.305939	0.257001	0.280784
cbs-1	0.212473	0.314721	0.258055	0.272536
spin-3	0.133456	0.401052	0.265809	0.318297
C32H11.3	0.0836948	0.262263	0.185332	0.157526
C32H11.4	0.0649673	0.174897	0.0918125	0.297559
C23G10.11	0.0207732	0.0888624	0.0275312	0.0216973
C32H11.9	0.0144876	0.0293171	0.00863928	0.0413637
dod-21	0.0140153	0.0304454	0.00766295	0.0464162

## Sheet: All genes
Gene	Pacdh-1::GFP;∆nhr-10; mthf-1(ww50)		Pacdh-1::GFP;∆nhr-10; sams-1(ww51)		Pacdh-1::GFP;∆nhr-10; metr-1(ww52)		Pacdh-1::GFP;∆nhr-10; mtrr-1(ww56)
	Fold Change	P adjusted	Fold Change	P adjusted	Fold Change	P adjusted	Fold Change	P adjusted
aap-1	1.17844	0.99796	0.895681	0.853717	1.21607	0.895939	0.805443	0.634145
aat-1	1.15433	0.99796	1.76182	0.300348	1.39335	0.819306	1.67586	0.425526
aat-2	1.31874	0.788329	1.1586	0.757447	1.51435	0.457283	1.58067	0.163033
aat-3	1.16247	0.99796	1.25915	0.699879	1.20175	0.961721	1.47425	0.39548
aat-4	1.12851	0.99796	1.24335	0.853869	1.08017	0.996899	1.22781	0.808703
aat-5	0.864552	0.99796	1.04715	0.958523	0.85506	0.982295	1.34601	0.563724
aat-6	0.64585	0.185171	0.7844	0.494211	0.727586	0.419273	0.61744	0.119848
aat-7	0.432045	0.9852	1.00631	0.996734	0.49467	0.911119	0.557495	0.640515
aat-8	0.875015	0.99796	1.15988	0.934903	1.14902	0.996899	0.872932	0.922236
aat-9	1.22609	0.804931	1.09471	0.859273	1.19653	0.810279	1.01024	0.984161
abf-2	5.5312	0.311177	3.19855	0.494167	4.96102	0.193208	5.0154	0.147528
abf-4	2.6227	1	4.29223	1	0.85619	1	4.17662	1
abf-5	7.10522	0.0752316	30.0455	0.000969649	7.10617	0.0599358	19.1787	0.019907
abf-6	5.20149	0.150115	19.5259	0.00123691	4.02914	0.354955	13.0275	0.0239088
abl-1	1.01655	0.99796	1.01137	0.985819	1.09447	0.996899	1.00708	0.989667
abt-1	0.878602	0.99796	0.801567	0.52568	0.858342	0.893919	0.834988	0.776381
abt-2	0.826954	0.991749	1.177	0.703966	0.845119	0.882103	1.01835	0.97525
abt-3	1.09114	0.99796	0.990527	0.993961	1.18928	0.990084	0.774427	0.716617
abt-4	1.56495	0.763152	1.13831	0.888537	0.983152	0.996899	1.26574	0.785626
abt-5	0.903218	0.99796	0.809081	0.522536	0.869135	0.97084	0.874797	0.765062
abu-1	0.418225	0.517836	0.185868	0.712588	0.308578	0.777308	0.384573	0.737835
abu-2	0.498962	0.99796	0.0248335	0.0982338	2.08215	0.961083	0.236012	0.420026
abu-4	0.459428	0.203959	0.0624834	0.00781752	0.740073	0.996439	0.284927	0.34178
abu-6	0.412611	0.99796	0.178823	0.712678	0.31364	0.961863	0.333998	0.740278
abu-7	0.427102	0.99796	0.177141	0.704593	0.346441	0.962932	0.355804	0.746116
abu-8	0.434396	0.99796	0.212993	0.736274	0.358245	0.927911	0.444382	0.782176
abu-9	0.324831	0.99796	0.37295	0.822085	0.520032	0.996899	0.199091	0.622758
abu-10	0.439565	0.99796	0.195888	0.701333	0.328231	0.864293	0.44191	0.790508
abu-11	0.42111	0.0907822	0.192967	0.650318	0.40223	0.26939	0.351595	0.689084
ace-1	0.717461	0.776233	0.827967	0.76526	0.734139	0.740569	1.04592	0.947698
ace-2	0.603267	0.298984	0.852893	0.788759	0.754102	0.803961	0.83126	0.717901
ace-3	0.97263	0.99796	1.00627	0.996287	1.18928	0.996899	1.7234	0.380886
ace-4	1.3693	0.99796	3.38385	0.429267	0.954113	1	2.34343	0.609779
acn-1	1.54241	0.995581	3.35987	0.0186539	1.64354	0.717363	2.69349	0.193497
aco-1	1.11079	0.99796	1.76488	0.258617	1.01284	0.996899	1.30928	0.683427
aco-2	1.02128	0.99796	1.11155	0.74341	0.97759	0.996899	0.993542	0.987516
acr-2	1.10621	0.99796	0.987372	0.995053	1.18269	0.996899	1.1038	0.922898
acr-3	1.02868	0.99796	0.951738	0.978691	1.0047	0.996899	1.20158	0.866954
acr-5	1.42044	0.99796	1.69568	0.706426	1.94648	0.824449	1.68408	0.64968
acr-6	1.52199	0.99796	1.33587	0.904788	1.76503	0.972188	1.6123	0.75472
acr-7	0.67136	0.99796	1.14786	0.940954	1.18878	0.996899	0.863511	0.919226
acr-8	0.953066	0.99796	1.10941	0.92295	0.954038	0.996899	1.00537	0.994525
acr-9	1.17946	0.99796	1.05978	0.977927	1.20379	0.996899	0.880819	0.919536
acr-10	0.830612	1	0.64639	1	0.933668	1	1.49418	0.813863
acr-11	1.06128	0.99796	1.04339	0.983037	1.42928	0.986908	1.49483	0.696555
acr-12	0.720135	0.99796	0.780916	0.802324	0.793866	0.996899	0.905518	0.919226
acr-14	1.03638	0.99796	1.17744	0.951808	1.10847	0.996899	1.3492	0.858015
acr-15	0.994148	0.99796	1.04997	0.964293	0.957913	0.996899	1.12199	0.862186
acr-16	1.02539	0.99796	1.25426	0.726966	1.18671	0.98704	1.22839	0.72472
acr-17	3.57026	0.541058	2.60136	0.642112	1.86057	1	3.94328	0.249783
acr-18	1.40642	0.99796	0.690883	0.723393	1.07399	0.996899	1.20596	0.841813
acr-19	0.991523	0.99796	0.670763	0.778876	0.758061	0.994776	0.931464	0.958728
acr-20	1.27982	0.99796	1.38375	0.76635	1.28818	0.991002	1.41858	0.670742
acr-21	1.50755	0.99796	0.938395	0.976721	1.67401	0.938443	1.21354	0.878758
lgc-11	0.270739	1	0.17628	1	0.120845	1	0.507975	1
acr-23	2.50766	0.768204	1.5184	0.825484	2.26036	0.773539	3.37691	0.18786
act-1	0.960863	0.99796	0.938995	0.917125	0.887563	0.966978	0.895092	0.797199
act-2	0.789614	0.493156	0.980793	0.977897	0.750801	0.10453	0.650699	0.120457
act-3	1.02213	0.99796	0.977357	0.970608	0.954365	0.996899	1.02294	0.964785
act-4	0.910195	0.99796	0.950734	0.922343	0.860806	0.855888	0.795969	0.527043
act-5	0.704481	0.405819	0.920341	0.891786	0.673407	0.208564	0.72288	0.604799
acy-1	1.13761	0.99796	1.18316	0.662994	1.1029	0.990084	1.16848	0.711939
acy-2	0.866095	0.99796	1.22178	0.886114	0.578555	0.851386	1.13331	0.906981
acy-3	1.14169	0.99796	1.85074	0.147361	1.16189	0.996779	1.7893	0.272494
acy-4	0.604833	0.640636	0.718309	0.549518	0.624047	0.484717	0.642516	0.37011
add-1	0.600291	0.133757	0.64159	0.348627	0.780458	0.810374	0.595972	0.165499
add-2	1.63597	0.458923	1.62721	0.326473	1.47046	0.609668	2.17982	0.00452417
adm-2	0.946054	0.99796	1.18511	0.59071	1.01085	0.996899	1.19764	0.725801
adm-4	1.36203	0.848317	1.08837	0.891786	1.24315	0.851386	1.06886	0.89828
adr-1	0.941881	0.99796	0.893982	0.799542	1.02698	0.996899	0.916363	0.848791
adr-2	1.19781	0.981202	0.863347	0.677767	1.16114	0.896363	0.734514	0.360413
ads-1	0.577658	0.0236095	0.714034	0.36376	0.664183	0.373051	0.698178	0.327183
adt-1	0.591663	0.273531	0.30981	0.586	0.633596	0.746317	0.368865	0.360413
adt-2	1.03367	0.99796	2.03745	0.000614154	1.11085	0.996439	1.74054	0.27626
aex-1	0.775321	0.99796	1.10628	0.915212	0.681918	0.835548	1.01494	0.984887
aex-2	1.06189	0.99796	0.814209	0.924849	1.01619	0.996899	1.14289	0.918436
aex-3	0.677563	0.347589	0.981944	0.976949	0.90597	0.996899	0.919904	0.861799
aex-5	0.689713	0.302273	1.05389	0.912379	0.775509	0.658563	0.988622	0.984887
aex-6	0.873456	0.99796	0.989977	0.991124	0.911996	0.996899	1.12786	0.808491
age-1	1.06888	0.99796	0.975025	0.970376	1.10378	0.990084	0.829138	0.664604
ags-3	0.964822	0.99796	1.11953	0.801554	1.18732	0.899519	1.27413	0.515811
agt-1	1.09159	0.99796	0.752683	0.56634	1.16107	0.968125	0.690337	0.376668
agt-2	1.31443	0.99796	1.00134	0.996763	1.17499	0.981206	0.794336	0.668672
aha-1	0.976247	0.99796	1.18072	0.749291	0.957126	0.996899	1.36613	0.451348
ahr-1	1.66524	0.99796	1.35738	0.866243	1.59355	0.961721	2.12257	0.444619
aip-1	0.927387	0.99796	0.842657	0.630557	0.825888	0.851386	0.828496	0.800975
air-1	1.05933	0.99796	0.847669	0.670301	0.99874	0.996899	0.669231	0.142895
air-2	0.966939	0.99796	0.755828	0.550077	0.912434	0.996899	0.563205	0.112254
ajm-1	1.02594	0.99796	1.02082	0.96456	1.06446	0.996439	1.01259	0.977934
aka-1	1.00362	0.99796	0.87518	0.775438	0.965149	0.996899	0.719428	0.38318
akt-1	1.46636	0.0556667	1.16756	0.591263	1.42509	0.149903	1.33872	0.318819
akt-2	1.19641	0.985261	1.25047	0.558986	1.27018	0.851729	1.73311	0.0444867
alg-1	1.00429	0.99796	1.50311	0.340024	1.13493	0.990084	1.21985	0.718116
alg-2	0.989713	0.99796	1.0556	0.916495	1.01769	0.996899	1.00511	0.991545
alh-1	0.840346	0.973785	0.980112	0.971092	0.937896	0.996899	0.930896	0.880204
alh-3	0.880997	0.99796	1.54029	0.131984	0.920459	0.996899	1.34291	0.646017
alh-4	0.904834	0.99796	0.930144	0.921545	0.90175	0.996899	1.0237	0.977095
alh-5	1.10694	0.99796	2.06694	0.000330741	1.43456	0.423859	1.58106	0.369072
alh-6	1.03983	0.99796	1.18927	0.631829	1.03756	0.996899	1.37815	0.264357
alh-7	1.12773	0.99796	1.16909	0.677767	1.10068	0.982295	1.18454	0.657057
alh-8	0.880092	0.99796	1.32651	0.237489	1.08406	0.989173	1.02396	0.966452
alh-9	1.03941	0.99796	1.79063	0.221615	0.7856	0.470904	1.97719	0.21714
alh-10	0.8259	0.99796	1.18781	0.794298	0.83825	0.973259	1.17683	0.74379
alh-11	0.986616	0.99796	1.13822	0.789123	1.06643	0.996899	1.13468	0.772257
alh-12	0.749429	0.923543	0.865349	0.822085	0.723222	0.608366	0.998067	0.995913
aly-1	1.10915	0.99796	1.5706	0.284561	1.18558	0.957585	1.89865	0.0672579
aly-2	1.10323	0.99796	0.875629	0.684278	0.982845	0.996899	0.76764	0.444619
aly-3	0.90688	0.99796	0.89898	0.801309	0.937664	0.996439	0.952511	0.905931
ama-1	1.12703	0.99796	0.994257	0.989646	1.21577	0.598612	1.10185	0.791076
amt-1	0.981359	0.99796	0.10377	0.483855	0.674736	0.996899	1.06335	0.987656
amt-2	0.876631	0.99796	0.811569	1	1.02269	0.996899	1.7713	0.706834
amt-3	1.21593	0.99796	1.04757	0.972834	0.996253	0.996899	1.26355	0.754808
amt-4	0.623743	0.636497	1.72845	0.330908	0.800521	0.877758	1.36654	0.751101
amx-1	0.954811	0.99796	1.37022	0.56757	1.02168	0.996899	1.3949	0.526537
amx-2	0.563378	0.44858	0.390468	0.190341	0.365146	0.078253	0.525204	0.537236
amx-3	0.517708	0.374885	0.695508	0.644189	0.610267	0.650268	0.805093	0.755178
anc-1	0.726433	0.369334	0.906692	0.80744	0.789345	0.753839	0.822073	0.591211
aos-1	1.05333	0.99796	0.940726	0.895612	0.95908	0.996899	0.886248	0.772275
apc-2	1.20013	0.99796	0.818079	0.678381	1.13787	0.990084	0.577999	0.15881
apc-10	0.952538	0.99796	0.812087	0.694239	1.00249	0.996899	0.733865	0.537236
apc-11	1.06624	0.99796	0.889759	0.859028	1.11081	0.996899	0.79577	0.675029
ape-1	1.10822	0.99796	0.951691	0.926591	1.12381	0.961083	0.860259	0.694572
aph-1	1.079	0.99796	0.828065	0.752886	1.09333	0.996899	0.757713	0.562895
aph-2	1.079	0.99796	0.946523	0.91057	1.09009	0.99171	0.83151	0.656372
apl-1	0.890804	0.99796	1.08597	0.813655	0.962977	0.996899	0.945437	0.881254
apm-1	0.862469	0.99796	1.05507	0.922343	0.941319	0.996899	1.09446	0.843679
apn-1	1.19275	0.99796	0.897844	0.835526	1.18162	0.950877	0.697816	0.355832
app-1	0.88986	0.99796	1.10597	0.8277	0.949662	0.996899	1.11668	0.798263
apr-1	1.2489	0.99796	1.10646	0.862834	1.25529	0.839578	0.794611	0.622098
aps-2	1.11842	0.99796	1.25493	0.734281	1.14463	0.996439	1.20869	0.754161
apg-1	1.00124	0.99796	1.12738	0.757555	1.03739	0.996899	1.03978	0.934807
aps-1	0.949731	0.99796	1.03931	0.944899	0.918968	0.996439	1.03175	0.962575
apb-1	1.14185	0.99796	1.26282	0.486061	1.14652	0.911822	1.13402	0.778536
apa-2	1.20724	0.99796	1.4763	0.43262	1.36758	0.646893	1.42034	0.524947
apd-3	0.915769	0.99796	1.07526	0.876815	1.0018	0.996899	0.945061	0.931654
apb-3	1.04966	0.99796	1.0612	0.882678	1.08888	0.996561	0.925691	0.844132
apm-3	1.19495	0.99796	0.914427	0.876139	1.39776	0.409022	0.992947	0.989667
aps-3	0.988272	0.99796	1.19112	0.614001	0.998045	0.996899	0.982872	0.977608
apt-9	1.14835	0.99796	1.2984	0.792512	0.947573	0.996899	1.78948	0.366355
apx-1	1.09221	0.99796	0.68385	0.613572	0.951677	0.996899	0.390025	0.0423427
aqp-1	0.668498	0.274799	0.870858	0.797742	0.579221	0.102002	0.722723	0.366994
aqp-2	1.39061	0.461258	1.18237	0.690033	1.20922	0.705233	1.38986	0.436599
aqp-3	0.909582	0.99796	0.887831	0.963598	0.838098	0.996899	0.650926	0.763847
aqp-4	0.339032	2.32e-08	0.496948	0.0137771	0.337642	1.33761e-07	0.397078	0.00995249
aqp-6	1.33844	0.99796	0.762604	0.904345	1.26373	0.996899	1.62526	0.70325
aqp-7	1.30778	0.447584	1.56209	0.397864	1.02537	0.996899	1.5497	0.328851
aqp-8	2.17223	0.147049	4.45439	0.00347658	1.54338	0.49304	2.99029	0.0257705
aqp-9	1.08965	0.99796	1.89167	0.282955	1.05045	0.996899	2.32279	0.142895
aqp-10	0.634396	0.127198	1.0398	0.957501	0.699688	0.336592	0.987863	0.983851
aqp-11	0.661242	0.0443058	0.914531	0.805769	0.680338	0.0447074	0.903136	0.774531
arc-1	1.00917	0.99796	1.42195	0.38855	1.00801	0.996899	1.37186	0.483565
ard-1	0.932539	0.99796	1.0119	0.979251	0.943901	0.996899	1.02166	0.967504
arf-1.2	1.038	0.99796	1.17413	0.705803	1.01425	0.996899	1.11546	0.824243
arf-3	1.09483	0.99796	1.37233	0.409025	1.1298	0.989469	1.20529	0.691261
arf-6	0.977761	0.99796	0.983193	0.974762	0.960403	0.996899	0.94334	0.890507
ark-1	1.15195	0.99796	1.15165	0.703107	1.11342	0.978474	1.21382	0.585571
arl-1	0.976225	0.99796	1.17989	0.786212	1.05509	0.996899	1.17124	0.751011
arl-3	0.807507	0.99796	1.07093	0.952049	0.889981	0.996899	1.2435	0.761463
arl-5	1.2978	0.996166	1.25225	0.690033	1.28137	0.859791	1.04309	0.954779
arf-1.1	1.56142	0.977228	1.03784	0.974921	0.367337	0.020347	0.871485	0.853143
arl-7	0.824062	0.99796	1.29752	0.85036	0.365077	0.420909	0.941252	0.962068
arl-8	1.05844	0.99796	1.0503	0.898035	1.00401	0.996899	0.822944	0.589763
arl-6	1.00948	1	1.57275	1	1.01059	1	1.74674	1
arr-1	1.14358	0.99796	1.46823	0.421612	1.26415	0.920078	1.53311	0.414369
aars-1	0.985611	0.99796	0.900793	0.814085	1.02161	0.996899	0.814861	0.594859
aars-2	0.980607	0.99796	1.15966	0.570794	0.995463	0.996899	1.14538	0.715605
art-1	1.03493	0.99796	1.25195	0.470737	0.932062	0.996899	1.02324	0.966319
arx-1	1.03888	0.99796	1.08243	0.836786	1.09783	0.979334	1.03364	0.944955
arx-2	1.02527	0.99796	0.99896	0.996816	1.03107	0.996899	0.893093	0.765258
arx-3	0.925267	0.99796	1.10433	0.770551	0.959618	0.996899	0.944781	0.900062
exos-4.2	0.954634	0.99796	0.74434	0.451437	0.951764	0.996899	0.644762	0.229003
arx-5	0.926729	0.99796	1.00939	0.98509	0.909389	0.979992	0.934421	0.876777
arx-6	1.02551	0.99796	1.04795	0.916495	0.980623	0.996899	0.943282	0.897133
arx-7	1.7978	0.00270671	0.935583	0.898889	0.853755	0.928085	1.85824	0.0543454
asb-1	1.04477	0.99796	0.814156	0.395643	0.965843	0.996899	0.814665	0.506603
asb-2	0.821933	0.989705	1.02097	0.971506	0.859677	0.857842	0.928643	0.878229
trip-4	1.10028	0.99796	1.105	0.832678	1.15316	0.891443	1.03663	0.933796
asg-1	0.99615	0.99796	0.891649	0.718253	1.02226	0.996899	0.927915	0.859569
asg-2	0.920918	0.99796	1.08189	0.884838	0.902853	0.983573	1.19989	0.702804
asm-1	0.965498	0.99796	0.872964	0.83064	1.06308	0.996899	1.15321	0.786352
asm-2	0.616349	0.165826	0.941187	0.935233	0.655069	0.406739	0.934214	0.891242
asm-3	0.0252713	9.26e-20	0.837677	0.861036	0.321657	0.124735	0.172402	8.23084e-06
asp-1	0.533056	4.71083e-05	0.738413	0.208015	0.533709	3.39548e-05	0.630511	0.27128
asp-2	1.39938	0.177783	1.32646	0.124134	1.27416	0.250344	1.34864	0.424351
asp-3	0.950241	0.99796	1.08979	0.776059	0.961479	0.996899	1.18058	0.687657
asp-4	0.914946	0.99796	1.16086	0.793221	1.03492	0.996899	1.14788	0.715605
asp-5	0.827433	0.948988	1.04507	0.915379	0.854127	0.794986	0.955976	0.925505
asp-6	1.0629	0.99796	1.23346	0.314506	0.894868	0.974932	1.06107	0.925368
atf-2	2.68755	0.252148	8.29779	0.00102808	2.94142	0.206492	6.86945	0.038389
atf-4	1.67214	0.188751	1.65168	0.0996188	1.42345	0.49304	1.7078	0.0823239
atf-6	1.19411	0.99796	1.11438	0.827886	1.28654	0.651522	1.12689	0.827832
atf-7	0.933772	0.99796	0.892129	0.690786	0.91727	0.974932	0.806238	0.624104
atgp-1	1.07775	0.99796	1.31036	0.408109	1.21127	0.743586	1.37599	0.310929
atgp-2	1.26547	0.781098	1.2933	0.597845	1.25191	0.684619	1.43426	0.370291
atl-1	1.27531	0.748703	0.870166	0.718253	1.2366	0.727291	0.78921	0.552131
atm-1	1.4126	0.329312	1.03503	0.951655	1.37351	0.278284	0.937571	0.891052
atn-1	0.956801	0.99796	1.04151	0.93435	0.891785	0.952628	1.09186	0.84567
atp-2	0.909376	0.99796	1.00134	0.996779	0.890925	0.894758	0.860692	0.688815
atp-3	0.96191	0.99796	1.06531	0.878804	0.933775	0.994776	1.08209	0.84717
atx-2	1.05299	0.99796	1.19615	0.69655	1.02212	0.996899	1.08234	0.871868
avr-14	1.25959	0.99796	1.08186	0.930896	1.22739	0.965953	1.26061	0.691108
avr-15	0.719396	0.99796	0.715167	0.687739	0.702535	0.940893	1.1479	0.865737
baf-1	1.01091	0.99796	1.11662	0.774547	0.971434	0.996899	1.16328	0.735072
bag-1	0.882023	0.99796	0.835958	0.589642	0.886037	0.951575	0.66254	0.313771
bam-2	0.833279	0.948796	1.02476	0.970376	0.971016	0.996899	1.14228	0.72387
bar-1	0.914201	0.99796	1.00167	0.996734	0.991255	0.996899	1.09313	0.861463
bas-1	0.613723	0.532258	1.00729	0.991642	0.708954	0.46671	1.03002	0.965367
pah-1	0.945087	0.99796	1.26157	0.573223	0.818939	0.785292	1.39599	0.281738
bbs-1	1.54429	0.99796	1.389	0.865816	1.91975	0.876472	1.82025	0.623105
bbs-2	1.11749	0.99796	1.12921	0.965437	0.97589	0.996899	1.88055	0.62834
bbs-8	0.942092	0.99796	1.10984	0.954057	0.905865	0.996899	1.4399	0.709144
bca-1	0.637363	0.196756	0.747377	0.431851	0.749364	0.545428	0.699333	0.383628
bcc-1	1.51439	0.99796	5.59124	0.047219	1.21104	0.996899	4.71117	0.115781
bec-1	0.962385	0.99796	0.912119	0.861974	0.943266	0.996899	0.789752	0.502013
ben-1	0.901848	0.99796	0.967748	0.956771	0.956734	0.996899	1.03489	0.942199
bir-1	0.951583	0.99796	0.958867	0.939171	0.948389	0.996899	0.763387	0.469607
bir-2	1.1527	0.99796	0.83681	0.751284	1.25236	0.892522	0.67886	0.505017
bli-1	8.61489	4.14653e-06	32.8127	4.40041e-19	12.5403	2.77562e-06	27.8196	2.52297e-05
bli-2	3.94773	0.0277104	8.63291	4.33416e-07	4.56221	0.00962315	8.43924	0.00473693
bli-3	0.745049	0.464828	0.825631	0.582643	0.798333	0.733215	0.871173	0.751101
bli-4	0.797804	0.99796	0.976187	0.983037	0.667017	0.680238	0.895731	0.887002
bli-5	0.648523	0.987939	0.573601	0.635232	0.52175	0.440744	0.656856	0.631247
bli-6	0.909772	0.99796	0.6828	0.582643	1.03985	0.996899	0.895014	0.843716
bmk-1	0.93626	0.99796	0.808655	0.421049	0.905404	0.966427	0.672674	0.244014
bpl-1	1.05125	0.99796	0.945181	0.915733	1.04047	0.996899	0.797905	0.564805
bra-1	1.23645	0.99796	0.844731	0.837738	1.41713	0.683459	0.778881	0.69327
F23H11.5	1.02621	0.99796	1.01113	0.983089	0.945722	0.996899	1.09025	0.843815
brc-1	1.21573	0.99796	0.843771	0.779596	1.0922	0.996899	0.560751	0.17607
brd-1	1.12991	0.99796	0.93227	0.898624	1.20125	0.878195	0.71837	0.397464
bre-1	1.12582	0.99796	1.59634	0.0392875	1.21771	0.93966	1.4391	0.39548
bre-2	0.780244	0.987783	0.66561	0.342507	0.780168	0.857936	0.646642	0.360814
bre-3	0.818115	0.99796	0.66454	0.358535	0.668534	0.335885	0.68	0.373515
bre-4	1.0335	0.99796	1.18297	0.749332	1.05189	0.996899	1.22233	0.620935
bre-5	0.94801	0.99796	0.920977	0.891786	0.863899	0.974932	0.741431	0.499886
brf-1	1.1106	0.99796	0.782098	0.570794	1.05969	0.996899	0.622917	0.187121
bro-1	3.78298	0.882069	4.84245	0.527387	1.99988	1	5.00056	0.434722
brp-1	1.28864	0.505551	1.5867	0.0181835	1.22555	0.625464	1.47934	0.164647
btf-1	1.11193	0.99796	0.927396	0.862834	1.14045	0.93966	0.797917	0.521203
bub-1	1.16601	0.99796	0.973287	0.964821	1.16153	0.902767	0.727362	0.363035
byn-1	0.857663	0.941965	0.717763	0.323547	0.848341	0.817681	0.750628	0.395287
cab-1	1.14484	0.99796	1.24433	0.390729	1.11684	0.962455	1.10702	0.815998
cah-1	1.23176	0.99796	1.61157	0.602162	1.19506	0.996899	1.56361	0.55821
cah-2	0.977993	0.99796	1.25199	0.852187	0.888125	0.996899	1.31185	0.750853
cah-3	1.39565	0.276249	1.99724	0.00259828	1.54521	0.0127901	1.83835	0.109601
cah-4	1.193	0.99796	1.88774	0.0514399	0.885581	0.996779	1.54959	0.313771
cah-5	0.805314	0.909976	0.883477	0.788941	0.852095	0.897757	1.05458	0.903409
cah-6	0.735453	0.938704	0.755511	0.620849	0.714257	0.743452	1.07478	0.903072
cal-1	1.26608	0.99796	1.3215	0.671062	0.910354	0.996899	1.94651	0.0935579
cal-2	1.28716	0.99796	1.55494	0.343467	1.12032	0.996899	1.64008	0.272684
cal-3	2.39935	0.973785	4.45622	0.248317	2.73692	0.725515	3.77385	0.300445
cal-4	1.08588	0.99796	1.10075	0.920324	1.06092	0.996899	1.36413	0.592083
cam-1	0.918618	0.99796	1.04785	0.942408	0.944264	0.996899	1.11234	0.81788
cap-1	1.01139	0.99796	1.03487	0.938093	0.961269	0.996899	1.03883	0.925606
cap-2	1.00799	0.99796	0.992449	0.986303	0.998513	0.996899	0.950595	0.897885
cas-1	1.05558	0.99796	1.16659	0.706426	1.09779	0.991002	1.25465	0.563057
cat-1	1.12122	0.99796	1.15092	0.886634	0.980651	0.996899	1.54991	0.458804
cat-2	0.762732	0.99796	0.846722	0.900165	0.718836	0.978474	1.49977	0.601844
cat-4	1.04701	0.99796	0.93377	0.896096	0.88583	0.981206	1.30374	0.505765
cav-1	2.13231	0.99796	0.648968	1	1.05848	1	1.11114	1
cav-2	0.642773	0.723979	0.527368	0.188248	0.664777	0.678144	0.594472	0.403494
cbp-1	1.06172	0.99796	1.01529	0.976949	1.11641	0.947641	0.853762	0.654948
cca-1	1.29119	0.985261	1.40478	0.408202	1.3035	0.685159	1.52785	0.255694
ccb-1	1.00916	0.99796	1.15313	0.778042	1.05139	0.996899	1.62835	0.122091
ccf-1	1.06538	0.99796	0.988687	0.983037	1.071	0.995703	0.912719	0.838654
ccg-1	1.30695	0.749386	1.44638	0.334483	1.14397	0.93966	1.51514	0.294249
cox-5B	0.926633	0.99796	0.990918	0.986303	0.940929	0.996899	1.11863	0.776368
cyp-13A7	0.70203	0.99796	0.773862	0.904328	0.227894	0.864855	0.983486	0.990244
cyp-14A5	0.551665	0.00672826	4.12994	0.564558	0.887354	0.961106	1.85259	0.494999
cyp-31A1	1.24938	0.996703	1.56637	0.131055	1.23572	0.876957	1.47728	0.329291
cyp-44A1	1.00314	0.99796	1.00975	0.987609	1.1158	0.990084	0.904835	0.842099
ccr-4	1.10645	0.99796	0.92425	0.888537	1.11801	0.969098	0.875741	0.724089
cct-1	0.872806	0.99796	0.848757	0.660592	0.895813	0.93966	0.818018	0.599315
cct-2	0.870592	0.99796	0.817968	0.468184	0.918447	0.975763	0.71109	0.311178
cct-4	0.898022	0.99796	0.837463	0.591669	0.931019	0.990084	0.851916	0.688017
cct-5	0.883874	0.99796	0.893576	0.773416	0.91386	0.969098	0.790109	0.520844
cct-6	0.867202	0.977894	0.803171	0.408109	0.882813	0.872885	0.841924	0.632112
cdc-6	1.13062	0.99796	0.91168	0.827923	1.0546	0.996899	0.76153	0.417763
cdc-14	1.06276	0.99796	0.902997	0.844073	1.08893	0.996899	0.804913	0.592375
cdc-25.1	1.12096	0.99796	0.815416	0.691967	1.04959	0.996899	0.584214	0.167277
cdc-25.2	2.07579	0.127705	3.06218	0.0201712	1.80559	0.258866	2.37409	0.296609
cdc-25.3	1.19119	0.99796	0.247279	0.668148	0.781692	0.996899	0.037357	0.0559749
cdc-25.4	0.824032	0.99796	0.756959	0.586588	0.83082	0.957585	0.729636	0.546071
cdc-42	1.06549	0.99796	0.98402	0.973402	0.949195	0.996899	1.02704	0.954659
cdd-1	0.765886	0.840288	0.815593	0.705803	0.883572	0.984259	0.891123	0.882886
cdd-2	0.94031	0.99796	1.15916	0.701291	0.789919	0.667309	1.02788	0.964307
cdf-1	0.802165	0.781098	0.864042	0.673322	0.765028	0.50085	0.950768	0.902947
cdh-3	1.01017	0.99796	2.189	0.180505	1.00282	0.996899	1.72824	0.408618
cdh-4	1.08878	0.99796	1.23961	0.598734	1.16375	0.969098	1.27648	0.587738
cdh-5	1.53793	0.985363	1.76452	0.296335	1.73634	0.498593	2.21591	0.265851
cdh-7	18.6748	0.00167361	165.915	0.0270593	11.0682	0.0552451	98.0914	0.0710084
cdh-9	1.24916	0.99796	1.11564	0.931214	1.24647	0.989469	1.20413	0.809985
cdh-10	10.2167	5.79e-09	71.0605	4.91631e-13	7.37105	0.00124405	46.0251	7.10656e-06
casy-1	1.13804	0.99796	1.21647	0.559771	1.11824	0.974932	1.41445	0.272494
cdk-1	1.11582	0.99796	1.00381	0.996287	1.05228	0.996899	0.936343	0.895341
cdk-4	0.858913	0.99796	1.06759	0.957868	0.85505	0.996899	1.03876	0.967132
cdk-5	1.01558	0.99796	0.812177	0.625458	1.02035	0.996899	0.672907	0.275126
cdk-7	1.21493	0.99796	0.906529	0.852768	1.14234	0.971768	0.721292	0.435206
cdk-8	1.01047	0.99796	1.11176	0.781448	1.05799	0.996899	0.945323	0.901101
cdk-9	1.0826	0.99796	1.0185	0.973926	1.07504	0.996899	0.950821	0.905867
cdl-1	1.18514	0.99796	0.938371	0.906798	1.10302	0.994776	0.78983	0.646067
cdr-1	0.181768	0.000194903	0.349288	0.477233	0.13378	2.24074e-05	0.369534	0.140965
cdt-1	1.22352	0.99796	1.03688	0.966169	1.13932	0.984008	0.827398	0.740278
cec-1	0.951306	0.99796	1.00133	0.996816	1.02803	0.996899	0.989315	0.983143
ced-1	1.15836	0.99796	1.96469	0.108076	1.20932	0.920225	1.8827	0.239496
ced-2	1.26515	0.99796	0.839275	0.783457	1.16507	0.986533	0.637975	0.345692
ced-3	1.20922	0.99796	0.740707	0.657042	1.15097	0.996439	0.458173	0.0862518
ced-4	1.09926	0.99796	0.929142	0.905412	1.18477	0.956741	0.845348	0.718647
ced-5	1.10491	0.99796	1.03007	0.964089	1.06951	0.996899	1.0805	0.858875
ced-6	1.21587	0.99796	1.2674	0.628814	1.08073	0.996899	1.29518	0.660689
ced-7	1.04416	0.99796	1.06505	0.87521	1.17749	0.795436	0.980964	0.965367
ced-8	1.642	0.99796	3.02973	0.540666	1.79269	0.974037	2.97384	0.45921
ced-9	1.06359	0.99796	0.890489	0.859273	1.1232	0.996439	0.713746	0.488531
ced-10	1.00229	0.99796	1.09253	0.832956	0.909039	0.983573	1.06514	0.898931
ced-11	0.959874	0.99796	0.887659	0.941055	1.27172	0.987364	1.00256	0.995813
ced-12	1.29068	0.919867	0.93609	0.911066	1.32642	0.717363	0.869675	0.756227
ceh-1	1.40026	0.99796	1.79455	0.692434	1.29739	0.996899	1.41004	0.814257
ceh-2	1.30033	0.99796	1.3495	0.91141	1.3955	0.996899	2.87779	0.449524
ceh-5	4.34063	0.16746	0.536265	1	1.86746	0.93966	0.934617	0.974655
ceh-6	1.40032	0.99796	0.861684	0.923237	1.14767	0.996899	1.25426	0.817426
ceh-8	1.56194	1	0.543558	1	0.997654	1	1.57757	1
ceh-10	1.55576	0.99796	2.26751	0.664391	1.3648	1	2.43001	0.55796
ceh-13	1.07176	0.99796	1.30719	0.630776	1.07891	0.996899	1.14799	0.785108
ceh-14	1.0367	0.99796	0.808152	0.814776	1.09135	0.996899	0.92553	0.925606
ceh-17	1.97127	1	4.21386	1	1.9513	1	7.73432	1
ceh-18	0.983263	0.99796	0.803148	0.567388	0.945501	0.996899	0.875678	0.780285
ceh-19	1.76	0.99796	1.82659	0.662994	1.62939	0.943203	2.34233	0.386799
ceh-20	1.09825	0.99796	1.43678	0.442079	1.3311	0.485197	1.53444	0.2078
ceh-21	1.07491	0.99796	0.45626	0.213101	1.2065	0.962932	0.512068	0.151035
ceh-22	1.08042	0.99796	1.3294	0.824207	1.35923	0.974932	1.44342	0.719967
ceh-23	0.894569	0.99796	0.885264	0.942233	0.762437	0.996899	1.02432	0.985413
ceh-24	1.09081	0.99796	1.46313	0.826813	1.17498	0.996899	1.81596	0.616964
pros-1	1.18309	0.99796	1.44743	0.494167	1.48232	0.565698	1.63584	0.364378
ceh-27	0.997315	0.99796	0.973687	0.986303	0.823775	0.996899	1.47335	0.591487
ceh-30	1.38444	0.99796	1.79152	0.674213	1.01463	0.996899	2.35932	0.370783
ceh-31	0.968951	0.99796	1.37617	0.847145	0.918333	0.996899	2.06328	0.445331
ceh-32	1.14126	0.99796	1.20509	0.741305	1.09871	0.996899	1.47213	0.369459
ceh-33	1.19881	0.99796	1.98719	0.776821	1.36228	0.996899	1.51823	0.838078
ceh-34	0.990693	0.99796	1.20233	0.835746	1.10282	0.996899	1.53437	0.464366
ceh-37	0.774937	0.861412	0.857208	0.737912	0.904887	0.996439	0.896104	0.808769
ceh-38	1.09472	0.99796	0.847997	0.701485	1.09285	0.996899	0.655451	0.217087
ceh-39	1.13958	0.99796	0.425882	0.0981169	1.07361	0.996899	0.428375	0.0761785
ceh-40	1.30377	1	0.938018	1	3.20284	1	2.5674	1
ceh-41	0.96089	0.99796	1.00052	0.996854	1.28716	0.946328	0.885961	0.871372
ceh-43	2.98987	0.145044	1.7367	0.623596	3.53539	0.0143037	2.49164	0.230022
ceh-44	1.07428	0.99796	1.09773	0.816376	1.06047	0.996899	1.01329	0.979444
cpg-1	1.16912	0.99796	0.58056	0.647163	0.968993	0.996899	0.166728	0.023775
cel-1	1.01105	0.99796	0.950847	0.915665	1.01749	0.996899	0.978786	0.965367
cep-1	1.16084	0.99796	0.880007	0.799061	1.0538	0.996899	0.692081	0.359364
cey-1	1.11811	0.99796	1.20884	0.607398	3.36806	1.58241e-19	1.07192	0.887002
cey-2	1.14361	0.99796	0.634838	0.462648	1.06491	0.996899	0.319862	0.0182436
cey-3	1.09436	0.99796	0.648461	0.354092	1.00454	0.996899	0.42596	0.019907
cey-4	0.946113	0.99796	0.977497	0.955484	1.0007	0.997154	0.812491	0.500841
cfi-1	1.48554	0.927457	1.30942	0.743696	1.13291	0.996899	1.96101	0.131133
cft-1	1.12817	0.99796	1.03546	0.971336	1.11226	0.996899	1.42919	0.457269
cfz-2	0.990132	0.99796	0.984748	0.991388	0.917413	0.996899	1.18632	0.815388
cgh-1	0.873179	0.99796	0.607766	0.437231	0.860353	0.989469	0.317002	0.0103471
cgp-1	0.842709	0.973785	0.942594	0.956771	0.871312	0.88763	0.676821	0.148564
cha-1	0.882617	0.99796	1.05058	0.970608	0.826549	0.989469	1.13258	0.852232
chd-3	1.40445	0.477229	1.99156	0.0877683	1.51402	0.312363	1.77764	0.19723
che-2	0.552021	0.843298	0.486543	0.546176	0.704778	0.957585	0.598929	0.559476
che-3	9.58022	3.13e-08	1.59553	0.389825	9.74842	1.62459e-14	2.64266	0.0010705
che-7	0.998008	0.99796	0.809074	0.876139	0.924343	0.996899	1.45843	0.631072
che-11	0.95792	0.99796	0.816606	0.888543	1.04563	0.996899	1.08972	0.935197
che-12	0.820361	0.99796	0.851199	0.888148	0.816012	0.996899	1.23315	0.785667
che-13	1.29516	0.99796	1.1115	0.936198	1.51104	0.796405	1.492	0.553478
che-14	1.92475	0.666616	3.12694	0.0270916	2.27259	0.215157	2.93679	0.0993714
chs-1	0.968264	0.99796	0.61577	0.498806	0.89109	0.996899	0.381651	0.0573262
chs-2	1.04552	0.99796	0.854212	0.8802	1.25283	0.978474	1.15337	0.849187
chk-1	1.11111	0.99796	0.89718	0.829335	1.06358	0.996899	0.853979	0.735279
chk-2	0.842675	0.99796	0.81013	0.613384	0.835309	0.878594	0.625841	0.313511
chn-1	1.0238	0.99796	0.917037	0.86851	1.00353	0.996899	0.781453	0.538668
cho-1	0.932797	0.99796	1.08382	0.949996	0.650086	0.897757	1.43792	0.621271
chp-1	0.824259	0.818022	0.795332	0.421709	0.830232	0.705273	0.829887	0.593196
cht-1	3.46785	0.352906	4.0887	0.127606	4.3316	0.126916	4.71977	0.100936
cic-1	0.936845	0.99796	0.921034	0.896435	1.03782	0.996899	0.895293	0.819007
cit-1.1	1.04251	0.99796	0.846687	0.660592	1.03855	0.996899	0.812812	0.570429
cit-1.2	1.06772	0.99796	1.18525	0.591751	1.11596	0.957585	1.11941	0.791076
cka-1	1.07272	0.99796	0.969157	0.970608	1.00425	0.996899	1.19685	0.727112
cka-2	1.23758	0.99796	1.48653	0.428307	1.18028	0.963713	1.61261	0.286853
ckb-1	0.941283	0.99796	1.23022	0.723393	0.781126	0.944116	1.39691	0.516277
ckb-2	0.335523	1.91263e-06	0.599983	0.583269	0.350797	0.000164425	0.539198	0.147459
ckb-4	0.97988	0.99796	1.40469	0.521925	0.989031	0.996899	1.3764	0.582033
ckc-1	0.664477	0.296412	0.916506	0.878804	0.719494	0.479276	0.879599	0.793498
cki-1	1.21286	0.99796	1.01153	0.989265	1.09747	0.996899	1.23495	0.697464
cki-2	1.11094	0.99796	0.765659	0.546176	1.14109	0.978474	0.739761	0.513227
ckk-1	0.898842	0.99796	0.969847	0.975462	0.800888	0.961083	1.08447	0.900949
cku-70	1.22524	0.911843	1.07313	0.874613	1.26322	0.573111	1.02456	0.963344
cku-80	1.25357	0.99796	1.00858	0.990164	1.16224	0.956115	0.865152	0.759369
cky-1	6.85058	0.0961167	26.8717	0.000218649	7.38036	0.0997408	24.6304	0.00297837
clc-1	0.932978	0.99796	0.72803	0.496338	0.670535	0.132827	1.01038	0.986412
clc-2	1.03271	0.99796	2.53075	0.476639	1.13762	0.996899	2.54224	0.397464
clc-3	1.35212	0.99012	2.03084	0.100548	1.52321	0.545403	1.51515	0.507257
clc-5	1.2745	0.99796	3.02533	0.314283	1.02117	0.996899	3.1537	0.185272
cle-1	0.931541	0.99796	0.661347	0.287082	0.851161	0.947726	0.713797	0.445408
clh-1	1.02882	0.99796	1.37476	0.546358	0.946923	0.996899	1.03889	0.925505
clh-2	1.63444	0.791733	1.3179	0.698091	1.41732	0.81965	1.46001	0.488531
clh-3	1.02011	0.99796	1.07152	0.935064	0.95365	0.996899	0.998444	0.996558
clh-4	1.01898	0.99796	0.976146	0.978123	0.938011	0.996899	1.41001	0.442446
clh-5	1.02193	0.99796	1.05282	0.908244	1.04267	0.996899	0.927055	0.868854
clh-6	0.997703	0.99796	0.946803	0.916495	0.987953	0.996899	0.907833	0.827869
cpi-2	1.00882	0.99796	1.10296	0.807824	0.992748	0.996899	1.15236	0.68424
cpi-1	0.86119	0.99796	0.895328	0.831979	1.29059	0.851386	1.31039	0.472835
clk-1	1.12342	0.99796	1.00298	0.996621	1.1586	0.93966	1.08472	0.854262
clk-2	1.10654	0.99796	0.845929	0.699527	1.07131	0.996899	0.715612	0.386377
cln-3.1	1.43773	0.536838	1.24608	0.766501	1.00318	0.996899	1.17541	0.798136
cln-3.2	1.15984	0.99796	1.22402	0.751322	1.17613	0.977126	1.25307	0.666324
cln-3.3	0.377408	0.023886	0.948863	0.948536	0.500244	0.0726062	0.490721	0.289694
clp-1	0.973471	0.99796	0.895098	0.775438	0.929469	0.996899	0.925325	0.854617
clp-2	1.15587	0.99796	1.0159	0.980941	1.12074	0.969324	0.95741	0.924613
clp-3	0.821352	0.99796	0.810785	0.674213	1.02372	0.996899	0.662016	0.571849
clp-4	1.21273	0.99796	1.30922	0.509753	1.60523	0.0852364	1.54629	0.212967
clp-6	0.914597	0.99796	0.71353	0.392583	0.99233	0.996899	0.549553	0.417264
clp-7	1.3393	0.542598	1.95157	0.00398886	1.38547	0.429232	1.75254	0.121207
clr-1	1.10572	0.99796	1.05183	0.922343	1.09985	0.978592	1.03145	0.953966
cls-2	0.914043	0.99796	1.01994	0.97184	0.930121	0.991002	0.922458	0.882799
clu-1	0.902506	0.99796	0.724371	0.143026	0.845858	0.844785	0.730442	0.309527
clx-1	8.60655	1	11.5073	1	10.2327	1	108.661	1.33152e-06
cmd-1	1.10812	0.99796	1.18261	0.540666	1.08711	0.994776	1.18661	0.604661
cmk-1	1.25676	0.99796	1.41588	0.500817	1.19793	0.974037	1.72329	0.274898
cnb-1	0.976746	0.99796	0.959464	0.940085	0.977159	0.996899	1.05968	0.895922
cnc-2	1.08287	0.99796	1.36945	0.827886	0.688968	0.990084	1.94631	0.538541
cnc-3	4.1186	0.0960614	12.188	9.70395e-08	5.31149	0.0196135	10.8872	0.00149192
cnc-4	0.729119	0.759769	0.902131	0.910648	0.530363	0.0115052	1.08209	0.88057
cng-1	0.949139	0.99796	11.2888	0.00395903	1.23249	0.996899	4.31478	0.043836
cng-3	0.514692	1	0.664478	1	0.396992	1	0.566516	1
cnk-1	1.08322	0.99796	0.967619	0.965809	1.03709	0.996899	0.862007	0.75243
cnt-1	1.11372	0.99796	1.01586	0.976949	1.12027	0.961083	1.03256	0.942199
cnt-2	0.94146	0.99796	0.840374	0.598373	0.969147	0.996899	0.767056	0.43499
cnx-1	0.966638	0.99796	1.06024	0.891395	1.00104	0.996899	0.979532	0.966619
cof-2	0.995812	0.99796	1.13904	0.88505	0.834349	0.991	1.45964	0.504656
cog-1	1.11929	0.99796	1.13341	0.853948	0.989536	0.996899	1.25724	0.642281
cogc-2	1.16563	0.99796	1.13209	0.757858	1.10933	0.973259	1.00968	0.984887
coh-1	1.58926	0.0739846	0.935042	0.895646	1.95798	0.000143397	0.800103	0.64367
coh-3	1.30644	0.593291	0.897988	0.811059	1.27357	0.594928	0.832754	0.664604
col-2	0.80444	1	0.174388	1	1.19925	1	2.12139	1
col-3	0.610397	0.00298495	0.349266	0.0660467	0.554582	0.0452722	0.518517	0.500905
col-7	0.527977	0.99796	0.0950979	0.630037	0.352107	0.984008	0.559888	0.897353
col-8	5.60066	0.99796	0.0766968	0.559771	1.88838	0.996899	1.60235	0.911945
col-10	0.538085	1.32421e-05	0.298893	0.0283466	0.394688	5.68211e-09	0.436883	0.428394
col-12	0.532461	0.0288658	0.219928	0.614936	0.445224	0.0915375	0.4071	0.702482
col-13	0.458565	0.0643414	0.194516	0.607398	0.308902	0.0373554	0.419524	0.730428
col-14	0.830471	0.99796	0.652882	0.642078	0.841095	0.977797	0.80312	0.71642
col-17	1.44759	0.99796	1.6695	0.530819	1.63744	0.793346	1.70808	0.488957
col-19	0.557575	0.99796	0.100209	0.581873	0.237394	0.748523	0.378124	0.756227
col-20	0.597904	0.99796	0.0812721	0.43093	0.272452	0.754168	0.404693	0.756625
col-33	0.741248	0.99796	0.349158	0.469892	0.92503	0.996899	0.54476	0.594859
col-34	1.09298	0.99796	0.723865	0.799424	1.35398	0.870715	0.772815	0.738007
col-38	1.09173	0.99796	0.91551	0.945741	1.11428	0.996899	1.10942	0.903178
col-39	0.486969	0.99796	0.153447	0.576792	0.320089	0.957585	0.503488	0.831541
col-40	1.01093	0.99796	0.482179	1	0.924554	1	1.02806	0.987656
col-41	1.19137	0.99796	1.03135	0.987339	1.39582	0.569882	1.15935	0.763216
col-43	0.927362	0.99796	4.13868	0.0292873	1.59768	0.966427	2.54332	0.38424
col-44	0.589113	1	0.162316	1	2.36346	1	1.12645	1
col-45	0.883197	0.99796	0.935191	1	0.764541	1	1.42099	0.841813
col-46	4.80725	0.00599732	27.7278	3.49072e-06	2.51641	0.650216	19.2398	0.00294338
col-47	12.9383	0.0537589	71.89	7.39183e-06	10.6802	0.10533	54.2155	0.00260409
col-48	0.945389	0.99796	0.896623	0.933555	1.00353	0.996899	1.12073	0.891242
col-49	0.926649	0.99796	0.576341	0.588844	0.933615	0.996899	0.800303	0.773712
col-53	1.21339	0.99796	0.950635	0.976949	0.941076	0.996899	1.12711	0.916605
col-54	0.970382	0.99796	0.619514	0.800473	1.07527	0.996899	0.97915	0.987659
col-56	2.70786	0.983362	2.17682	1	2.14563	1	2.69197	0.617194
col-58	0.562015	0.29088	0.265345	0.160758	0.621326	0.577927	0.467812	0.513159
col-60	0.465457	5.87e-08	0.199391	0.573223	0.365538	0.000216148	0.367208	0.653661
col-61	0.691925	0.612953	0.354203	0.324218	0.68798	0.407131	0.506047	0.438041
col-62	0.447226	0.99796	0.0979438	0.621012	0.279503	0.957585	0.468452	0.849511
col-63	1.22876	0.99796	0.719488	0.819242	1.54808	0.872885	1.04041	0.973657
col-64	1.12609	0.99796	0.821011	0.938002	1.20299	0.996899	1.14315	0.909681
col-65	0.565973	0.0190804	0.263358	0.646197	0.527301	0.199022	0.448183	0.726697
col-68	0.629613	0.685214	0.476793	0.342507	0.658753	0.581447	0.670518	0.604195
col-69	0.740399	0.988589	0.44312	0.359728	0.703649	0.832313	0.488815	0.426014
H17B01.2	0.8593	0.99796	0.498091	0.475823	1.02651	0.996899	0.148103	0.0492164
col-71	0.917199	0.99796	0.778965	0.808178	0.998163	0.997154	0.895222	0.889659
col-73	0.995704	0.99796	0.830153	0.867915	1.03702	0.996899	0.992926	0.993182
col-74	1.19063	1	0.893868	1	0.971418	1	1.42096	1
col-75	1.58145	0.99796	1.22553	0.938926	1.44032	0.990084	1.2361	0.882352
col-76	0.434732	0.000459619	0.45835	0.0476027	0.455869	0.00219975	0.662254	0.434466
col-77	0.722704	0.839032	0.388437	0.392412	0.606817	0.115428	0.590756	0.532482
col-79	3.12589	0.0737477	5.02842	1.73974e-05	3.41111	0.048435	4.52541	0.0180858
col-80	1.43894	0.99796	0.1289	0.376406	0.625884	0.996899	0.854744	0.968524
col-81	0.572227	0.99796	0.164624	0.684278	0.852194	0.996899	0.436129	0.790966
col-83	1.46814	0.99796	0.693048	1	2.70307	0.568115	0.945357	0.97773
col-87	1.13402	0.99796	0.575313	1	1.0744	0.996899	1.51148	0.81788
col-88	0.411556	4.00792e-06	0.165714	0.652108	0.279007	0.0354081	0.348249	0.675969
col-89	0.688773	0.91889	0.372523	0.453635	0.749014	0.904909	0.429528	0.402751
col-90	0.562793	0.123798	0.349498	0.0703126	1.15069	0.996779	0.582279	0.538668
col-91	0.335889	0.00251451	0.206339	0.699527	0.205795	0.00459423	0.39947	0.738897
col-92	0.55106	0.531458	0.206684	0.574726	0.392703	0.222674	0.460373	0.751101
col-93	0.563473	0.751876	0.169693	0.616171	0.394614	0.870715	0.425924	0.749021
col-94	0.653013	0.585015	0.255879	0.590102	0.578549	0.54819	0.462044	0.740278
col-95	11.1791	0.99796	0.108058	1	5.07206	0.97084	2.08066	0.848881
col-96	0.781137	0.99796	0.274147	0.727423	0.447944	0.956741	0.432009	0.786529
col-97	0.791454	0.99796	0.620669	0.614936	0.780887	0.932747	0.762995	0.651177
col-98	34.4123	0.330958	62.1281	0.0812078	6.01498	0.851386	53.2682	0.057636
col-99	1.30721	0.99796	2.26115	0.0324803	1.52176	0.657504	1.87353	0.270535
col-101	7.55537	0.829659	0.607207	0.468825	1.26573	0.996899	1.81448	0.672464
col-103	5.49616	0.67461	7.67304	0.00630597	1.34771	0.996899	6.3448	0.000267643
col-104	0.80183	0.99796	0.605762	0.56757	0.76656	0.921252	0.770602	0.675029
col-105	0.986974	0.99796	0.951901	0.981917	1.40526	0.978502	1.08683	0.950121
col-106	0.570796	0.821154	0.158028	0.5615	0.366019	0.250344	0.450182	0.763791
col-107	0.765605	0.99796	0.370669	0.652375	1.09399	0.996899	0.536859	0.568517
col-109	0.962215	0.99796	0.996628	0.996816	1.00012	0.999666	1.17847	0.82025
col-110	3.76711	0.0237137	7.48068	1.22092e-08	4.10196	0.0128846	6.6876	0.00324684
col-111	1.21546	0.99796	0.97025	0.98494	1.43353	0.853504	1.00975	0.990142
col-113	0.555272	0.000116649	0.389375	0.442724	0.551204	0.0226356	0.473076	0.397464
col-115	0.733433	0.99796	0.335701	0.647835	0.658361	0.733806	0.535863	0.594569
col-117	0.596786	0.0207395	0.353716	0.0123357	0.468247	0.0239147	0.506674	0.475794
col-118	0.885617	0.99796	0.600483	0.611122	0.861105	0.911119	0.603519	0.46972
col-119	0.856292	0.99796	0.0345729	0.258757	0.348324	0.982295	0.442241	0.814933
col-120	0.465566	0.000202215	0.226308	0.599778	0.341212	2.8583e-05	0.378056	0.460369
col-122	0.599929	0.891136	0.169633	0.578362	0.413857	0.300207	0.430554	0.74488
col-123	0.362114	0.99796	0.340576	1	0.347526	1	1.17158	0.945284
col-124	0.605842	0.99796	0.153298	0.603993	0.285214	0.657504	0.427569	0.770649
col-125	0.764961	0.530582	0.358302	0.358625	0.807176	0.73462	0.551981	0.548221
col-126	0.512324	0.99796	0.0704238	0.521925	0.266048	0.807987	0.694607	0.922957
col-127	0.512324	0.99796	0.0704238	0.521925	0.266048	0.807987	0.694607	0.922957
col-128	19.0938	0.000226007	110.101	0.0110808	9.93252	0.0532887	75.8245	0.0444867
col-129	0.646333	0.99796	0.172059	0.674213	0.456537	0.974932	0.45965	0.80377
col-130	0.877302	0.99796	0.463981	0.719271	1.36903	0.723384	0.637073	0.623105
col-131	1.61162	0.903282	1.06762	0.970608	1.86345	0.518624	1.35215	0.703813
col-132	0.888213	0.99796	1.62076	0.894741	1.05006	0.996899	0.674496	1
col-133	0.485316	0.019696	0.195968	0.56757	0.428888	0.121767	0.427885	0.702231
col-135	3.51839	0.99796	0.0527506	0.333148	1.63673	0.996899	0.364354	0.779487
col-137	0.293531	0.736937	0.168709	0.706588	0.106535	0.288648	0.349775	0.730428
col-138	0.877729	0.99796	0.624506	0.647163	0.944112	0.996899	0.808847	0.781795
col-139	0.612552	0.99796	0.168125	0.666129	0.416533	0.96614	0.468967	0.809044
col-140	0.632649	0.99796	0.161397	0.656488	0.31249	0.742039	0.410541	0.768855
col-141	0.775462	0.99796	0.266865	0.0505759	0.550794	0.404909	0.442346	0.444619
col-142	2.78058	0.99796	0.405154	0.359728	1.22808	0.996899	1.35757	0.842952
col-143	43.1493	0.684968	0.326695	0.710842	9.16189	0.876276	6.76353	0.604195
col-144	0.587502	0.000322418	0.289569	0.0722931	0.486634	0.0195702	0.43397	0.449278
col-145	0.42909	9.20214e-06	0.198885	0.594265	0.405922	0.0654997	0.351836	0.643977
col-146	0.499077	0.99796	0.154265	0.687683	0.406579	0.991	0.597502	0.903072
col-147	0.990069	0.99796	0.422447	0.775119	0.732434	0.996899	0.913828	0.979444
col-148	0.50733	0.9852	0.214303	0.609487	0.463553	0.795436	1.26142	0.877201
col-149	2.64405	0.99796	9.84307	0.442724	1.05269	0.996899	9.73954	0.340234
col-150	0.424696	0.0176609	0.147077	0.452549	0.303337	0.0105671	0.469465	0.758125
col-152	0.542483	0.0982025	0.254491	0.687683	0.484699	0.387088	0.433431	0.74379
col-153	1.35593	0.789191	2.31061	0.000403079	1.5932	0.39912	2.36035	0.241063
col-154	0.456291	0.00603757	0.262226	0.583273	0.56776	0.249932	0.412031	0.491055
col-155	0.509685	0.000759166	0.22926	0.565981	0.514841	0.217412	0.397486	0.45921
col-156	0.398808	8.57e-07	0.18616	0.681091	0.21873	0.00356994	0.376815	0.661665
col-157	0.527215	0.246719	0.302135	0.659325	0.509845	0.276496	0.440113	0.498544
col-158	1.37541	1	8.43505	0.147362	1.64519	1	4.14422	0.384494
col-159	0.506706	0.194041	0.182694	0.602162	0.34274	0.0462156	0.411927	0.725683
col-160	0.60748	0.99796	0.167084	0.363088	0.302057	0.763383	0.452663	0.773017
col-161	0.480333	8.28041e-06	0.201817	0.568268	0.453661	0.0334027	0.395444	0.665754
col-162	0.48823	0.000441133	0.197327	0.599814	0.435265	0.0563054	0.383936	0.675037
col-166	0.724058	0.342629	0.665512	0.178522	0.688133	0.281037	0.639164	0.514683
col-167	0.556945	0.000619321	0.275128	0.0115572	0.429168	0.0214502	0.431135	0.382909
col-168	0.519306	5.65333e-05	0.247864	0.0155165	0.323438	2.36598e-06	0.499345	0.527613
col-169	0.758431	0.936092	0.629717	0.369051	0.575727	0.113154	0.785343	0.74488
col-170	0.439586	2.38377e-05	0.202915	0.00470725	0.282042	3.76521e-13	0.45397	0.391975
col-172	1.36118	0.99796	1.08253	0.960755	1.58716	0.754587	1.32725	0.688815
col-173	1.33073	0.99796	1.00076	0.998984	1.51947	0.892522	1.09689	0.930466
col-174	0.686301	0.91889	0.382468	0.507259	0.774668	0.945657	0.512149	0.539118
col-175	0.916505	0.99796	0.709382	0.730978	0.9752	0.996899	0.952141	0.958173
col-176	9.93596	7.36e-12	69.3895	6.25306e-08	1.19506	0.996899	58.9948	3.24611e-10
col-177	0.66507	0.99796	0.259385	0.373135	0.659128	0.952294	0.925416	0.959852
col-178	0.550333	0.99796	0.107684	0.531098	0.24877	0.60495	0.394872	0.754309
col-179	1.82633	0.99796	0.236055	0.674213	0.586745	0.996899	0.740929	0.935328
col-180	0.430964	6.94e-10	0.200833	0.549518	0.320874	0.000113087	0.423579	0.497949
col-181	0.548081	0.773638	0.143281	0.538911	0.388808	0.337136	0.459964	0.768816
col-182	1.39286	0.99796	1.46468	0.565981	1.62143	0.652273	1.72535	0.308996
col-184	0.561407	0.859887	0.153112	0.56757	0.341285	0.222836	0.425175	0.746271
col-186	0.84798	0.99796	0.4517	0.526578	0.948122	0.996899	0.766328	0.710584
col-187	0.829606	0.99796	0.369529	0.786341	0.997567	0.997154	0.577467	0.821517
coq-1	0.833689	0.99796	0.951891	0.917538	0.757513	0.427098	0.930209	0.878758
coq-2	1.05887	0.99796	1.02235	0.976277	1.08398	0.996899	1.10673	0.821945
coq-3	0.969773	0.99796	0.903695	0.836786	0.917766	0.996899	0.87715	0.779096
coq-4	1.16827	0.99796	0.981778	0.979422	1.12941	0.988701	1.03611	0.96388
coq-5	1.00239	0.99796	0.990441	0.986303	0.851823	0.869028	1.1131	0.822418
coq-6	0.994535	0.99796	0.972843	0.964308	0.973081	0.996899	1.24897	0.602978
coq-8	0.98548	0.99796	0.941002	0.891854	0.877661	0.93966	1.00685	0.987558
cor-1	0.943916	0.99796	1.03369	0.961035	0.883342	0.989469	1.30258	0.483509
cpb-1	1.17369	0.996896	1.08948	0.904465	1.25371	0.658563	1.38472	0.297259
cpb-2	0.849583	0.99796	0.876054	0.727165	0.842991	0.960495	0.881205	0.783308
cpb-3	1.12933	0.99796	0.745289	0.458098	1.1102	0.995467	0.664327	0.298668
cpf-1	1.06991	0.99796	0.818415	0.546358	1.04321	0.996899	0.72551	0.337596
cpf-2	1.1381	0.99796	0.96394	0.938674	1.09343	0.989469	0.959922	0.923838
cpin-1	0.686345	0.517836	0.915408	0.879505	0.584246	0.200351	1.02801	0.96388
cpl-1	1.31057	0.99796	1.51052	0.514551	1.45277	0.754703	1.39179	0.602978
cpn-1	1.03313	0.99796	0.827446	0.581135	0.973939	0.996899	0.679736	0.163092
cpn-2	1.33909	0.99796	1.78965	0.474773	1.50244	0.863936	1.7078	0.464322
cpn-3	1.09183	0.99796	0.999996	0.999632	1.06838	0.996899	0.918702	0.843679
cpn-4	0.921095	0.99796	0.878519	0.801309	1.00013	0.99834	1.18097	0.637776
cpr-1	1.86166	0.116299	2.85534	7.27616e-06	2.44552	8.13586e-05	2.15284	0.125429
cpr-2	0.657315	0.99796	1.64376	0.751322	0.320257	0.730698	0.425132	0.602978
cpr-3	0.935159	0.99796	1.24614	0.430207	0.571613	0.103928	1.26285	0.802772
cpr-4	3.37278	0.000250115	8.97623	9.00729e-13	2.83465	0.000498689	6.04821	0.00115078
cpr-5	1.79556	0.177374	2.40431	0.0649176	1.4402	0.485197	2.60068	0.193083
cpr-6	0.845074	0.99796	1.17847	0.841375	1.03498	0.996899	1.0585	0.938203
cps-6	1.11023	0.99796	1.06059	0.909373	1.20215	0.795436	0.99624	0.993182
cpz-1	0.877385	0.99796	1.15791	0.905939	1.11977	0.996899	1.04263	0.966219
cpz-2	0.743823	0.601045	1.04293	0.913942	0.902035	0.948147	1.0555	0.903636
crb-1	0.945197	0.99796	1.05409	0.96456	1.15964	0.996899	1.16187	0.857557
crh-1	0.87402	0.99796	0.909649	0.872264	0.782263	0.790813	0.968242	0.961446
crn-1	1.10214	0.99796	1.08305	0.884838	1.0948	0.996439	0.867622	0.798494
crn-2	1.07777	0.99796	1.42708	0.602162	1.02804	0.996899	0.971559	0.961558
crn-3	1.10645	0.99796	0.750503	0.288065	1.05562	0.996899	0.639691	0.144003
crn-4	1.31433	0.99796	1.06495	0.967054	0.852317	0.996899	0.961475	0.967436
crn-5	1.04967	0.99796	0.904063	0.87142	1.14232	0.983573	0.869506	0.78309
crn-6	0.8071	0.99796	1.01426	0.986969	0.905396	0.996439	1.15607	0.770646
cars-1	1.04662	0.99796	1.10272	0.805045	1.09934	0.974037	1.02192	0.967132
cars-2	1.28585	0.99796	1.55904	0.427655	1.27861	0.971768	1.38875	0.642634
crt-1	0.751803	0.338756	1.17256	0.824905	0.810075	0.770561	1.04113	0.95302
csb-1	1.24584	0.973785	0.458502	0.00794896	2.07803	0.0212402	0.351589	0.00156454
csc-1	1.14084	0.99796	0.811797	0.663814	1.1377	0.978502	0.693981	0.385218
csk-1	1.03994	0.99796	0.939273	0.886304	1.0367	0.996899	0.806808	0.535491
csn-1	1.08543	0.99796	1.01136	0.981917	1.10151	0.97785	0.958865	0.924728
csn-2	1.04244	0.99796	0.931439	0.866065	1.00062	0.997154	0.838547	0.619923
csn-3	1.04524	0.99796	0.892534	0.751129	1.00252	0.996899	0.918574	0.826305
csn-4	1.06568	0.99796	0.869615	0.727165	1.01958	0.996899	0.817696	0.618929
csn-5	1.08854	0.99796	0.858869	0.705803	1.0785	0.996899	0.760473	0.461756
csn-6	1.02739	0.99796	0.940746	0.906865	1.11442	0.971651	0.826584	0.607382
csp-1	1.91645	0.850486	1.1065	0.959052	1.58052	0.93966	1.4114	0.778725
csp-2	0.959581	0.99796	0.943177	0.947133	1.03084	0.996899	1.11921	0.891242
csp-3	1.64739	0.99796	2.34948	0.651404	1.57218	0.996439	3.72477	0.277873
csq-1	0.9484	0.99796	0.98629	0.984134	0.956265	0.996899	1.25866	0.597553
ctb-1	0.860212	0.99012	0.947988	0.925853	0.722749	0.115171	1.21301	0.609779
ctl-1	1.0457	0.99796	1.54504	0.04973	1.23596	0.803875	1.3259	0.444363
ctl-2	1.00921	0.99796	1.39645	0.0810188	1.11221	0.961083	1.16394	0.715055
ctn-1	1.16151	0.99796	1.6433	0.259981	1.2942	0.919638	1.75025	0.192446
cts-1	0.909846	0.99796	1.20738	0.631382	0.879054	0.872885	0.973905	0.964194
cua-1	0.818612	0.973785	0.778731	0.442506	0.774732	0.636418	0.727145	0.35954
cuc-1	0.801653	0.99796	0.967845	0.969774	0.816334	0.911119	0.882022	0.801141
cul-1	1.02745	0.99796	0.982082	0.970617	0.98063	0.996899	0.939022	0.878615
cul-2	1.06541	0.99796	0.920368	0.807466	1.08282	0.98704	0.870528	0.668916
cul-3	1.0433	0.99796	0.930816	0.848389	1.06093	0.996899	0.816746	0.531812
cul-4	1.09702	0.99796	0.902711	0.804399	1.08066	0.996899	0.83861	0.636633
cul-5	0.988387	0.99796	0.938804	0.895612	0.993033	0.996899	0.880577	0.74488
cul-6	1.37948	0.727923	1.88166	0.319766	1.20661	0.940893	2.14019	0.0371357
cup-2	0.918019	0.99796	1.02098	0.974273	1.02719	0.996899	1.03099	0.960572
cup-4	0.78114	0.99796	0.873796	0.852768	0.726313	0.774644	1.6459	0.238898
cup-5	0.90622	0.99796	0.863965	0.799542	0.918202	0.996899	0.652361	0.273276
cut-1	1.29399	0.99796	0.703779	1	0.909774	1	0.198578	1
cut-6	2.83743	0.188751	5.6867	7.16617e-05	3.91074	0.0603049	5.47097	0.0401711
cux-7	0.995863	0.99796	0.899088	0.823716	0.96541	0.996899	0.812791	0.602568
cwn-1	1.15842	0.99796	1.65782	0.212449	1.1851	0.977797	1.71411	0.142592
cwn-2	1.74479	0.684813	1.53226	0.521925	1.3047	0.977126	1.79122	0.314079
cwp-4	1.08551	0.99796	1.61106	0.754379	1.25575	0.996899	1.55339	0.74488
cya-1	1.1889	0.99796	0.776991	0.602162	1.13523	0.990084	0.640048	0.287548
cya-2	1.07377	0.99796	1.49691	0.816376	1.30914	0.996899	1.11255	0.953228
cyb-1	0.943275	0.99796	0.778328	0.601099	0.959374	0.996899	0.57847	0.254659
cyb-2.1	1.05873	0.99796	0.586185	0.565291	1.0046	0.996899	0.238234	0.00609263
cyb-2.2	1.05762	0.99796	0.627436	0.622461	0.933491	0.996899	0.271943	0.0114208
cyb-3	1.10715	0.99796	0.676299	0.570794	1.02911	0.996899	0.453233	0.0365011
cyc-1	0.885803	0.99796	1.01769	0.973269	0.851807	0.730093	1.04456	0.922957
cyd-1	3.44643	0.143871	9.089	0.00331215	3.13575	0.267803	5.76982	0.0610034
cye-1	1.04788	0.99796	0.811216	0.698223	1.04767	0.996899	0.642786	0.232375
cyk-1	1.37876	0.420906	1.22778	0.550409	1.55152	0.0138873	1.27158	0.473349
cyk-3	1.02355	0.99796	0.986781	0.981576	1.02112	0.996899	0.909533	0.834595
cyk-4	1.12551	0.99796	0.928844	0.866243	1.10439	0.982778	0.788498	0.507711
cyl-1	1.1539	0.99796	1.00832	0.987427	1.10898	0.987851	0.880722	0.750853
cyn-1	1.0061	0.99796	0.987342	0.981576	0.985525	0.996899	1.07317	0.875994
cyn-2	0.795123	0.789191	0.830912	0.587382	0.837704	0.723714	0.730636	0.515772
cyn-3	1.05027	0.99796	1.01928	0.97184	0.949097	0.996899	1.01159	0.98217
cyn-4	1.13588	0.99796	0.940366	0.900925	1.08304	0.996779	0.899914	0.808515
cyn-5	0.832533	0.99796	1.19425	0.705803	0.890185	0.989469	1.13006	0.840795
cyn-6	1.85024	0.416764	7.45147	6.17975e-06	1.95045	0.243885	6.00898	0.0210349
cyn-7	0.910572	0.99796	0.842937	0.502009	0.885576	0.899807	0.687257	0.140965
cyn-8	0.958758	0.99796	1.28594	0.67018	1.04851	0.996899	1.10273	0.890145
cyn-9	1.23108	0.973785	0.841695	0.647835	1.0801	0.996899	0.59135	0.0709565
cyn-10	1.14003	0.99796	0.824579	0.681091	1.06852	0.996899	0.872109	0.769284
cyn-11	0.975614	0.99796	0.842626	0.656714	0.995117	0.996899	0.758264	0.436664
cyn-12	1.05416	0.99796	0.870418	0.757558	1.05191	0.996899	0.874377	0.74488
cyn-13	1.06729	0.99796	0.893885	0.765195	1.09449	0.990084	0.798318	0.496074
sig-7	1.04769	0.99796	0.896823	0.826525	0.980403	0.996899	0.788484	0.551747
cyn-15	1.04986	0.99796	0.9876	0.983376	1.06833	0.996899	0.993216	0.987517
cyn-16	1.13966	0.99796	0.915513	0.830872	1.12439	0.961083	0.909252	0.807183
cyn-17	1.43591	0.99796	0.911982	0.955077	1.60449	0.871796	1.37677	0.722784
dab-1	0.949005	0.99796	0.863923	0.799424	0.937643	0.996899	0.860191	0.72153
dac-1	0.724306	0.843821	0.585646	0.539308	0.716897	0.702418	0.692118	0.707829
dad-1	0.893975	0.99796	1.10906	0.799424	0.875322	0.895939	1.15193	0.74455
daf-1	1.02495	0.99796	1.21783	0.692434	0.894624	0.991646	1.14631	0.786352
daf-2	1.13297	0.99796	1.30599	0.560202	1.26163	0.717363	1.02121	0.970972
daf-3	1.00002	0.99796	1.01751	0.980927	1.04773	0.996899	1.14108	0.776368
daf-4	1.17125	0.99796	1.08015	0.893948	0.946241	0.996899	1.12599	0.840116
daf-5	0.932413	0.99796	1.37723	0.33055	1.08514	0.990084	0.98281	0.9742
daf-6	1.79844	0.756633	3.94618	0.00323968	1.99403	0.503648	3.16794	0.0811582
daf-7	1.09315	0.99796	1.37326	0.571049	1.01564	0.996899	1.35948	0.604661
daf-8	1.06712	0.99796	1.64967	0.0286148	0.982455	0.996899	1.75006	0.34178
daf-9	1.21839	0.99796	1.37646	0.700957	1.05477	0.996899	1.21269	0.826599
daf-10	0.776036	0.99796	0.558855	0.762587	0.64648	0.884315	0.766446	0.822418
daf-11	0.575117	0.99796	0.828325	0.915022	0.929025	0.996899	1.37731	0.75472
daf-12	1.1132	0.99796	1.55308	0.0843186	1.16562	0.878916	1.15889	0.754309
daf-14	0.960534	0.99796	1.27439	0.546951	0.967068	0.996899	1.19743	0.715636
daf-15	0.987169	0.99796	0.994475	0.991388	1.03364	0.996899	0.840854	0.623855
daf-16	1.32718	0.406418	1.20714	0.466154	1.29768	0.40776	1.20374	0.55821
daf-18	1.19355	0.99796	0.795881	0.769397	1.08172	0.996899	0.506835	0.159535
daf-19	1.14943	0.99796	1.17384	0.851583	1.18363	0.986809	1.37324	0.582033
hsp-90	0.815655	0.789191	0.791688	0.514099	0.789042	0.352853	0.726019	0.417371
daf-25	1.13763	0.99796	1.01371	0.983037	1.26172	0.746317	0.871652	0.746054
daf-28	0.711691	0.99796	1.08231	0.947676	0.706548	0.933279	0.94628	0.958426
daf-31	0.894686	0.99796	0.891782	0.747699	0.867995	0.872885	0.879696	0.721133
dao-2	7.38685	1.64784e-05	40.4562	1.39009e-11	7.69003	0.000346282	30.0371	2.92084e-05
dao-3	1.35315	0.99796	1.37021	0.656714	1.40238	0.817231	1.50325	0.479973
dao-4	2.13861	0.608828	1.96776	0.412662	2.06304	0.457355	2.28999	0.184189
dao-5	0.840346	0.800462	0.70171	0.0562489	0.911411	0.989469	0.686804	0.239962
dao-6	0.400533	0.0317552	0.400798	0.673322	0.407118	0.470962	0.626558	0.74488
dap-3	0.852758	0.973785	0.797991	0.399922	0.819549	0.662416	0.769891	0.4101
dat-1	0.570533	0.599763	0.615389	0.442079	0.485737	0.518987	0.886783	0.896821
daz-1	1.19592	0.99796	0.720175	0.430722	1.15451	0.977126	0.583166	0.110541
dbl-1	1.18939	0.99796	1.18489	0.701333	1.06217	0.996899	1.15153	0.77215
dbr-1	1.38183	0.516663	0.918764	0.854632	1.29435	0.623176	0.796544	0.552952
dcp-66	1.12374	0.99796	1.17943	0.692878	1.07755	0.994776	1.05867	0.901101
dcr-1	1.19905	0.846035	1.04373	0.914167	1.20597	0.600171	0.916442	0.800496
dcs-1	1.03107	0.99796	1.01156	0.984204	1.00385	0.996899	0.921504	0.875397
ddp-1	0.950849	0.99796	0.996397	0.996287	0.877705	0.93966	1.16909	0.751011
deb-1	1.1687	0.99796	1.32477	0.550077	1.15996	0.958003	1.49096	0.368594
deg-1	1.14941	0.99796	0.747125	0.737348	0.867169	0.995467	1.10646	0.870628
deg-3	1.00704	0.99796	0.843882	0.789171	1.30328	0.816781	1.00926	0.987558
del-1	1.13778	0.99796	1.30626	0.857208	1.23722	0.996899	1.61149	0.60628
del-2	1.24953	0.99796	1.0679	0.970376	1.52796	0.879642	1.11153	0.91916
des-2	0.986106	0.99796	1.09727	0.886114	1.05371	0.996899	1.10883	0.833728
dgk-1	1.0962	0.99796	1.34016	0.521925	1.11589	0.996439	1.31244	0.520366
dgk-2	0.94441	0.99796	1.3114	0.289268	1.08455	0.996899	1.25918	0.52159
dgk-3	0.821449	0.99796	1.40899	0.837775	0.885806	0.996899	1.11119	0.946127
dgn-1	1.04957	0.99796	1.31411	0.442724	1.18299	0.899392	1.16818	0.672952
dhc-1	1.04448	0.99796	1.00575	0.991124	1.15085	0.807987	1.09896	0.809238
dhp-1	1.22084	0.99796	2.03019	0.03807	1.41886	0.717363	1.8287	0.136862
dhp-2	1.12324	0.99796	1.40594	0.358535	1.22211	0.867355	1.59653	0.15982
dhs-1	1.07023	0.99796	0.94855	0.935064	1.08932	0.996899	0.807948	0.634145
dhs-2	0.433416	0.034875	0.979778	0.980978	0.826579	0.95777	0.942467	0.911183
dhs-3	0.514933	0.0110101	0.824436	0.621012	0.549014	0.000247799	0.879276	0.73201
dhs-4	0.833597	0.99796	2.83937	0.171533	0.805897	0.995467	1.9589	0.483509
dhs-5	2.01849	0.0318738	5.69547	5.30064e-05	1.92905	0.201486	4.54786	0.012252
dhs-6	0.976868	0.99796	1.20942	0.613397	1.04117	0.996899	1.02569	0.969269
dhs-7	0.528745	0.649932	0.790101	0.828012	0.564984	0.63554	0.887948	0.900716
dhs-8	1.60536	0.99796	4.02371	0.213735	0.898772	0.996899	2.54303	0.418446
dhs-9	0.949118	0.99796	1.02543	0.974273	1.03403	0.996899	0.907658	0.868676
dhs-11	1.12462	0.99796	0.879754	0.826995	0.991593	0.996899	0.736463	0.485002
dhs-12	0.94407	0.99796	0.987509	0.981576	0.90008	0.977835	1.04932	0.931581
dhs-13	1.02373	0.99796	1.09857	0.837347	0.964608	0.996899	0.889794	0.776011
dhs-14	0.727598	0.726065	1.05771	0.931523	0.983464	0.996899	1.19868	0.685506
dhs-15	2.65145	0.861997	3.13271	0.43819	2.67131	0.737737	2.86402	0.463124
dhs-16	3.32571	0.444185	9.89461	0.00111568	3.38872	0.266335	8.80765	0.0154072
dhs-17	1.24274	0.99796	0.996192	0.996734	0.961261	0.996899	1.25351	0.753539
dhs-18	0.911053	0.99796	1.34009	0.546358	0.874769	0.996899	1.03539	0.959286
dhs-19	1.3134	0.99796	1.32507	0.723393	1.4092	0.867355	1.94123	0.183947
dhs-20	0.726776	0.902801	1.56465	0.237657	0.965467	0.996899	1.42679	0.609684
dhs-21	0.471067	0.00360384	0.555611	0.0783578	0.372742	0.000679581	0.70056	0.447875
dhs-22	1.03269	0.99796	1.21022	0.539043	1.02137	0.996899	1.28301	0.551164
dhs-23	0.661375	0.99796	0.744712	0.887584	0.699271	0.996439	0.933815	0.967132
dhs-24	0.909474	0.99796	0.889911	0.774507	0.897846	0.977797	0.752056	0.423503
dhs-25	0.76485	0.830146	0.855024	0.794717	0.68039	0.176645	0.797682	0.625491
dhs-26	0.951257	0.99796	1.99178	0.770551	15.7774	0.0915375	4.26911	0.419519
dhs-27	1.52162	0.883899	5.43969	0.00938679	1.36147	0.918146	3.36475	0.105333
dhs-28	0.842185	0.923543	0.947117	0.905939	0.920015	0.996439	0.874075	0.676176
dhs-29	1.48286	0.903282	4.10597	0.00148839	1.56653	0.441044	3.67106	0.0459175
dhs-30	0.889514	0.99796	0.871032	0.70634	0.883696	0.990084	0.973468	0.955476
ints-6	1.0394	0.99796	0.882797	0.794717	1.01067	0.996899	0.767382	0.503006
die-1	1.69314	0.352194	1.41807	0.438138	1.54871	0.530677	1.37926	0.528313
dif-1	0.890062	0.99796	1.17726	0.611212	1.01125	0.996899	1.03243	0.9505
dig-1	0.90029	0.99796	1.1789	0.674213	0.991445	0.996899	1.33538	0.385884
dim-1	0.963671	0.99796	1.02192	0.974273	0.898	0.974932	1.16745	0.709144
dis-3	0.86623	0.99796	0.687932	0.193162	0.896256	0.974932	0.733434	0.363408
div-1	1.11965	0.99796	0.97662	0.970608	1.05417	0.996899	0.800741	0.638802
dlc-1	0.996892	0.99796	1.01993	0.976351	0.98182	0.996899	0.905983	0.805762
dlg-1	1.13163	0.99796	1.30542	0.633135	1.19348	0.969191	1.35669	0.539497
dli-1	1.06906	0.99796	1.0959	0.822085	1.06079	0.996899	1.00962	0.984887
dlk-1	1.08139	0.99796	1.50165	0.0997593	1.06646	0.996899	1.19539	0.738897
dna-2	1.12267	0.99796	0.931648	0.882758	1.1401	0.94982	0.791611	0.521203
dnc-1	1.10224	0.99796	1.02642	0.953161	1.13574	0.88362	0.918111	0.831016
dnc-2	1.06526	0.99796	0.989728	0.983162	0.985035	0.996899	1.00244	0.994673
dnj-1	0.986841	0.99796	0.868818	0.703107	0.912114	0.989469	0.848793	0.658614
dnj-2	0.887493	0.99796	1.14855	0.816372	0.902261	0.996439	1.07117	0.910325
dnj-3	1.00573	0.99796	0.888573	0.873511	0.951095	0.996899	0.783927	0.661665
dnj-4	1.26596	0.953289	0.857556	0.799542	1.17486	0.961721	0.770785	0.560688
dnj-5	1.01238	0.99796	0.838199	0.691633	1.03405	0.996899	0.632855	0.18548
dnj-7	0.842025	0.99796	1.18297	0.819746	0.840053	0.940893	0.882133	0.815388
dnj-8	1.07735	0.99796	0.998524	0.996734	1.10552	0.974932	0.955768	0.914239
dnj-9	0.923886	0.99796	0.935897	0.878996	0.903623	0.981206	0.825334	0.611913
dnj-10	0.950246	0.99796	0.872779	0.705803	0.838666	0.754587	0.872414	0.696715
dnj-11	0.897143	0.99796	0.748371	0.24437	0.829407	0.688122	0.631444	0.0559522
dnj-12	0.819093	0.84959	0.782008	0.383151	0.775342	0.355901	0.754494	0.483937
dnj-13	0.73219	0.411629	0.814632	0.576792	0.843028	0.921252	0.718358	0.514106
dnj-14	1.12704	0.99796	1.33316	0.468184	1.15074	0.961106	1.43417	0.272684
dnj-15	0.933021	0.99796	0.832686	0.707816	0.947473	0.996899	0.689469	0.375753
dnj-16	0.926871	0.99796	0.878556	0.684199	0.879249	0.921252	0.924971	0.859911
dnj-17	1.00025	0.998224	0.817233	0.584042	0.912839	0.991002	0.654183	0.183341
dnj-18	1.20944	0.99796	0.807306	0.664614	1.15251	0.982295	0.718601	0.441883
dnj-19	0.894487	0.99796	0.870628	0.703966	0.921549	0.989741	0.701367	0.317769
dnj-20	0.799597	0.611623	0.926436	0.853869	0.807628	0.518987	0.844872	0.654948
dnj-21	0.945566	0.99796	0.835788	0.758309	0.847998	0.973259	0.873918	0.806674
dnj-22	1.17482	0.99796	0.84469	0.690275	1.1067	0.996439	0.557324	0.0644861
dnj-23	0.984301	0.99796	0.831939	0.674213	0.928138	0.996899	0.720458	0.378868
dnj-24	0.766055	0.617517	0.842127	0.598734	0.741273	0.211162	0.907423	0.843665
dnj-25	0.991406	0.99796	0.873181	0.795086	1.08565	0.996439	0.760546	0.510369
dnj-26	0.638568	0.727923	0.701763	0.602503	0.956532	0.996899	0.605659	0.409947
dnj-27	1.21721	0.99796	2.83874	0.0754415	1.45598	0.868732	2.18209	0.340489
dnj-28	1.11506	0.99796	0.964137	0.96456	1.04768	0.996899	0.971322	0.95711
dnj-29	0.905748	0.99796	1.13041	0.776059	0.943663	0.996899	0.989811	0.983908
dnj-30	1.0567	0.99796	0.888073	0.766309	0.987251	0.996899	0.835747	0.627699
dog-1	1.24783	0.84959	1.18772	0.674213	1.17661	0.850234	0.888769	0.790966
dom-3	1.24636	0.99796	0.901416	0.871948	1.22404	0.891443	0.818671	0.671031
cks-1	1.18285	0.99796	0.981818	0.976947	1.07757	0.996899	0.887578	0.803638
dop-1	1.03944	0.99796	1.12663	0.926233	1.02741	0.996899	1.17703	0.850222
dop-2	0.987146	0.99796	1.1037	0.917538	1.08273	0.996899	1.11319	0.878758
dpf-1	0.860954	0.99796	0.600396	0.458098	0.946276	0.996899	0.761383	0.715055
dpf-2	0.918748	0.99796	0.777885	0.770551	0.737944	0.975763	0.822382	0.846063
dpf-3	1.05698	0.99796	1.10667	0.76489	1.05929	0.996899	0.99852	0.995583
dpf-4	1.33221	0.411108	0.987062	0.980147	1.22725	0.63873	1.05879	0.891895
dpf-5	1.07973	0.99796	1.14144	0.64165	1.12864	0.907974	0.948336	0.896812
dpf-6	2.68426	0.352194	4.46179	0.00359506	3.1853	0.110541	4.61284	0.0420825
dpf-7	1.10069	0.99796	0.842348	0.690625	1.03523	0.996899	0.871465	0.75243
dpl-1	1.15797	0.99796	0.802579	0.652924	1.10718	0.996439	0.566715	0.082978
dpy-1	2.55155	0.155363	3.03942	0.0846523	3.9268	0.000523629	2.22521	0.110118
dpy-2	13.5462	7.31e-08	75.1608	3.72628e-10	10.4039	0.00144176	53.6158	0.00012333
dpy-3	24.6771	1.1e-08	139.884	3.7786e-10	20.7685	0.000205831	106.777	0.0119539
dpy-4	1.10655	0.99796	1.00306	0.996816	1.24982	0.978474	1.0653	0.937481
dpy-5	1.07055	0.99796	0.860869	0.89335	1.1246	0.996899	1.0416	0.965367
dpy-6	40.5187	1.96e-14	310.51	1.07609e-10	7.37553	0.0284578	147.29	4.89058e-10
dpy-7	17.9205	1.35e-10	94.5235	1.191e-11	15.6754	1.9552e-05	69.0824	2.00305e-05
dpy-8	19.4639	5.68e-08	94.7211	4.92488e-10	17.0573	0.0259592	71.6314	0.0177894
dpy-9	12.6332	1.25e-07	69.7786	1.10104e-09	9.84988	0.00139484	56.6828	8.17229e-05
dpy-10	20.3788	7.86e-11	113.919	1.05916e-11	14.9585	4.52692e-05	80.6568	1.35894e-05
dpy-11	1.10814	0.99796	2.26975	0.1258	1.20984	0.994776	2.04798	0.360413
dpy-13	1.11469	0.99796	0.98715	0.992445	1.20123	0.994776	1.10745	0.89828
dpy-14	1.80299	0.99796	1.05212	1	1.13381	1	1.15483	0.954657
dpy-17	2.20367	0.352194	1.19888	0.895196	1.78492	0.71021	1.23452	0.831016
dpy-18	0.388474	0.0448059	0.739463	0.653813	0.505136	0.0949499	0.695144	0.507539
dpy-19	1.14755	0.99796	2.61855	0.212815	1.17998	0.996899	2.88098	0.168031
dpy-20	1.70813	0.625443	3.21205	0.00206964	1.25698	0.969098	2.80669	0.0956757
dpy-21	1.01583	0.99796	0.958657	0.938002	1.1385	0.918146	0.874265	0.702804
dpy-22	0.935635	0.99796	1.10546	0.757558	1.00222	0.996899	1.01358	0.975266
dpy-23	1.19045	0.99796	1.52624	0.355021	1.23581	0.851386	1.34325	0.584943
dpy-26	1.19482	0.973785	0.904441	0.794935	1.21733	0.692612	0.808175	0.534787
dpy-27	1.08414	0.99796	1.53541	0.357816	1.14023	0.995852	1.52285	0.41631
dpy-28	1.21262	0.938458	0.969485	0.961925	1.25032	0.633176	0.932752	0.873954
dpy-30	0.997106	0.99796	0.959872	0.934396	0.927262	0.994776	0.983065	0.972245
dre-1	1.5733	0.781098	2.15036	0.0485916	1.52835	0.717363	1.97103	0.143979
drh-1	0.981756	0.99796	0.995487	0.995325	0.943074	0.996899	1.02135	0.970939
drh-2	0.820748	0.898178	1.22994	0.666537	0.890873	0.989469	1.11741	0.841813
dro-1	1.15468	0.99796	0.806601	0.651128	1.09245	0.996899	0.571585	0.091484
drp-1	1.14081	0.99796	0.962842	0.93435	1.07104	0.996899	0.88879	0.769659
dars-1	0.934538	0.99796	1.04144	0.925878	0.90679	0.965953	0.999669	0.99852
dars-2	1.03495	0.99796	0.819523	0.637982	0.998454	0.996899	0.805713	0.647314
dsc-1	2.52128	1	2.99719	1	1.7419	1	3.05119	0.523805
dsc-4	0.668405	0.232345	1.00987	0.987339	0.615163	0.119356	0.758987	0.55821
dsh-1	0.984063	0.99796	1.20775	0.629913	1.07311	0.996899	1.34676	0.462156
dsh-2	1.05307	0.99796	0.764545	0.653813	0.98714	0.996899	0.551855	0.192931
dsl-3	0.763687	0.99796	0.820908	1	0.792318	0.996899	0.927686	0.974066
dsl-5	9.23248	1	16.9533	1	7.35881	1	14.1733	1
dsl-7	0.669368	0.99796	0.221143	0.35851	0.309288	0.466807	0.594567	0.742002
duo-1	1.09252	0.99796	0.772154	0.616017	1.06389	0.996899	0.633579	0.30657
duo-3	1.2018	0.99796	0.853838	0.776059	1.1211	0.994776	0.724182	0.464249
dur-1	1.34202	0.980117	1.41486	0.573223	1.32834	0.748586	1.64849	0.410423
dyb-1	1.49849	0.756633	1.50309	0.408617	1.26953	0.947983	1.74783	0.174501
dyc-1	1.02039	0.99796	1.19214	0.746803	1.05676	0.996899	1.30615	0.514993
dyf-1	0.899641	0.99796	0.887409	0.932887	0.9548	0.996899	1.11161	0.912826
dyf-2	1.51875	0.878834	1.27469	0.776929	1.27935	0.982295	1.75585	0.315836
dyf-3	0.902923	0.99796	1.15263	0.902965	0.782002	0.990084	1.38908	0.675029
dyf-5	0.967768	0.99796	0.760245	0.863715	0.833948	0.996899	1.50336	0.669291
dyf-6	0.997604	0.99796	1.00139	0.997217	0.8445	0.996899	0.982327	0.984887
dyf-7	1.10566	0.99796	1.12021	0.82825	0.903239	0.996899	0.83783	0.699481
dyf-11	1.14325	0.99796	0.905438	0.964821	1.00199	0.996899	1.58639	0.665422
dyf-13	1.04535	0.99796	0.89309	0.967054	0.997267	0.997154	1.11409	0.950747
dyn-1	1.34976	0.388851	1.15229	0.641547	1.26226	0.433863	1.02047	0.970602
dys-1	1.06568	0.99796	1.58469	0.233164	1.17464	0.97084	1.45643	0.368528
alp-1	1.01751	0.99796	1.10767	0.824905	0.971358	0.996899	1.43933	0.32467
eat-2	0.903372	0.99796	1.01449	0.995371	0.64758	0.991	1.89072	0.562524
eat-3	0.966784	0.99796	0.792783	0.451437	0.874674	0.933974	0.784417	0.450208
eat-4	1.25855	0.99796	1.30978	0.714745	0.836469	0.996439	1.57615	0.417763
eat-5	1.47193	0.99796	1.08772	0.971506	1.36863	0.995944	1.93584	0.513004
eat-6	0.87999	0.99796	0.95147	0.906798	0.849896	0.851386	0.864687	0.668324
eat-16	0.943641	0.99796	1.23056	0.492961	0.857858	0.963534	1.22898	0.58691
eat-18	0.594727	0.99796	0.888845	0.966725	0.326827	0.81965	0.545202	0.6944
eat-20	1.35761	0.99796	1.49647	0.571274	1.54592	0.733215	1.53484	0.537236
bcat-1	1.30253	0.99796	0.852195	0.864544	0.959698	0.996899	0.716721	0.587278
ech-1.1	0.261285	8.46e-07	0.542114	0.237922	0.35556	3.56403e-05	0.388089	0.00218484
ech-2	0.900557	0.99796	0.800741	0.565986	0.85644	0.901315	0.922524	0.849547
ech-3	0.923905	0.99796	1.15641	0.806951	0.799678	0.921252	1.00173	0.995601
ech-4	0.772818	0.734663	1.12886	0.705803	0.824165	0.738636	1.00942	0.984887
ech-5	0.851797	0.977228	1.00123	0.996854	0.854559	0.847211	0.874171	0.762371
ech-6	2.41066	4.37865e-05	2.16706	0.000225545	2.0303	2.9012e-05	2.32029	0.000198442
ech-7	2.90178	0.00130401	3.47193	0.00101226	1.74119	0.250859	2.18246	0.140152
ech-8	1.11677	0.99796	1.59984	0.127507	1.25342	0.919638	1.29038	0.555888
ech-9	1.8846	0.816821	0.751319	0.703966	0.877742	0.996899	0.537571	0.304175
eff-1	1.62028	0.896524	3.27155	0.0234462	1.55579	0.851386	2.83331	0.0571806
efk-1	1.20311	0.99796	1.21249	0.649548	1.16503	0.948253	1.32589	0.476958
efl-1	1.24536	0.99796	0.94357	0.928974	1.12199	0.994776	0.736299	0.510199
efl-2	1.13948	0.99796	0.818133	0.781363	1.16806	0.989469	0.69755	0.519973
efn-2	0.953088	0.99796	1.22531	0.722455	1.21172	0.947619	1.10883	0.847145
efn-3	0.874831	0.99796	0.438921	0.262128	0.718622	0.858722	0.387434	0.470102
efn-4	1.23891	0.99796	1.23283	0.824905	1.11833	0.996899	1.40219	0.604661
eftu-2	0.96696	0.99796	0.911296	0.805045	1.00845	0.996899	0.904082	0.7755
eef-2	0.924555	0.99796	0.916784	0.787308	0.949495	0.996899	0.849306	0.642281
eef-1A.1	0.942157	0.99796	0.940467	0.861974	0.960021	0.996899	0.819875	0.549657
eef-1A.2	0.634922	0.343592	0.882927	0.790972	0.689368	0.290124	0.851218	0.69186
egl-1	1.58164	0.99796	0.926469	1	1.05707	0.996899	1.20083	0.92239
egl-2	1.01205	0.99796	1.25968	0.751284	1.01841	0.996899	1.29232	0.656797
egl-3	1.2377	0.957657	1.29368	0.339428	1.289	0.467072	1.28966	0.509212
egl-4	1.08252	0.99796	1.23514	0.584146	1.07777	0.994776	1.01697	0.975331
egl-5	1.38442	0.99796	1.41031	0.662428	1.30029	0.959427	1.53527	0.472126
egl-6	0.889493	0.99796	0.683635	0.778489	0.775634	0.996439	0.822866	0.860757
egl-8	0.737387	0.517163	0.933973	0.892657	0.762766	0.602648	0.841936	0.675029
egl-9	0.873905	0.99796	0.981741	0.973269	0.657786	0.0635127	1.08813	0.843679
egl-10	0.762142	0.938458	0.81434	0.715161	0.77025	0.850234	0.835447	0.742002
egl-13	1.87667	0.0151731	2.20034	0.00370935	1.71143	0.0900048	2.16828	0.0898106
egl-15	1.78888	0.435349	2.85352	0.000377864	1.88784	0.0633984	2.66889	0.029057
egl-17	1.0966	0.99796	1.01871	0.98867	0.827553	0.996779	1.01635	0.98554
egl-18	2.00809	0.0340232	2.43919	0.065022	1.82893	0.0900048	2.17011	0.170558
egl-19	0.9936	0.99796	1.14144	0.821592	0.999597	0.997495	1.08192	0.882799
egl-20	1.24801	0.953673	1.28674	0.557044	1.30736	0.700846	1.67238	0.294043
egl-21	1.14114	0.99796	1.30384	0.494211	1.21126	0.878916	1.31713	0.516136
egl-23	1.12426	0.99796	1.24459	0.705803	1.14638	0.996439	1.1345	0.843665
egl-26	0.987408	0.99796	0.891162	0.864749	0.960855	0.996899	0.998402	0.995583
egl-27	1.37046	0.439177	0.99173	0.988541	1.35286	0.382573	0.795779	0.546025
egl-30	1.05921	0.99796	1.27315	0.568548	1.07763	0.996899	1.06797	0.89474
egl-36	0.868924	0.99796	0.747676	0.724102	0.737927	0.938032	0.891093	0.888991
egl-38	1.58996	0.938458	2.09338	0.224452	1.45736	0.941879	2.29173	0.181577
egl-43	1.3022	0.99796	1.65762	0.420743	1.33073	0.95777	1.99826	0.231383
egl-44	0.985105	0.99796	1.25057	0.586539	1.03944	0.996899	1.11761	0.841813
egl-45	0.993709	0.99796	0.846651	0.516259	0.937905	0.996269	0.868523	0.670528
egl-46	1.25518	0.99796	1.26535	0.876691	0.895786	0.996899	2.03621	0.401934
egl-47	1.01809	0.99796	0.944647	0.976088	1.14221	0.996899	1.23042	0.845964
ego-1	1.1001	0.99796	0.753128	0.47727	0.995533	0.996899	0.738673	0.492285
ego-2	1.12857	0.99796	1.29792	0.494236	1.22399	0.851386	1.15659	0.738462
ehs-1	1.22946	0.770451	1.00136	0.996816	1.21341	0.715781	0.86017	0.710733
eif-3.B	1.00874	0.99796	0.912899	0.77706	0.973603	0.996899	0.976963	0.958728
eif-3.C	0.90345	0.99796	0.897411	0.755269	0.856158	0.812502	1.00058	0.997714
eif-3.D	0.924754	0.99796	0.90825	0.753912	0.924941	0.990084	0.905243	0.807642
eif-3.E	0.970453	0.99796	1.01566	0.977036	0.960403	0.996899	1.0829	0.836644
eif-3.F	0.933477	0.99796	0.859441	0.623774	0.913638	0.974932	0.984502	0.971133
eif-3.G	0.855373	0.944997	0.857129	0.591836	0.812395	0.528092	0.964895	0.927244
eif-3.H	0.908372	0.99796	0.92637	0.821917	0.876293	0.871858	1.0221	0.96177
eif-3.I	0.96802	0.99796	0.910821	0.767782	1.00022	0.99866	0.981322	0.964843
eif-3.K	0.957364	0.99796	0.944567	0.895021	0.910807	0.969241	1.00233	0.995225
eif-6	0.888786	0.99796	0.851995	0.648678	0.919607	0.986533	0.887166	0.720974
elb-1	1.05125	0.99796	1.03661	0.949878	1.09976	0.990084	0.99714	0.994673
elc-1	1.00597	0.99796	0.977125	0.970608	1.02919	0.996899	0.991726	0.987517
elo-1	0.966656	0.99796	1.22984	0.413592	0.910557	0.982295	1.05668	0.879998
elo-2	1.58811	0.574475	1.90128	0.176865	1.26605	0.95941	1.37921	0.57274
elo-3	0.974367	0.99796	1.00217	0.996734	0.990173	0.996899	0.949565	0.904523
elo-4	1.72385	0.740152	2.31762	0.0406014	1.93097	0.354201	2.5831	0.151901
elo-5	1.01521	0.99796	1.21129	0.753912	0.526484	0.0500023	0.880265	0.823009
elo-6	0.876055	0.99796	1.29374	0.705803	0.554672	0.215692	0.992086	0.990534
elo-7	0.987243	0.99796	0.915719	0.92801	0.915172	0.996899	1.02116	0.979782
elo-8	0.800118	0.985363	0.725739	0.432786	0.828672	0.862931	0.797545	0.762291
elo-9	0.702461	0.684193	0.757198	0.738536	0.651598	0.370307	0.679969	0.631737
elp-1	0.822515	0.99796	0.979699	0.979422	0.916116	0.996899	1.13156	0.781599
elt-1	1.09133	0.99796	1.18174	0.718253	1.02448	0.996899	0.97302	0.96584
elt-2	1.29742	0.953673	1.23905	0.692434	1.38426	0.63645	0.942969	0.920477
elt-3	0.945954	0.99796	1.87968	0.576792	0.961156	0.996899	1.65557	0.602978
elt-4	1.19223	0.99796	1.45191	0.892657	1.36997	0.996899	1.54198	0.804069
elt-6	1.07341	0.99796	1.74867	0.354198	1.14684	0.996899	1.75805	0.443778
emb-4	0.970549	0.99796	0.881747	0.701333	1.02658	0.996899	0.813125	0.517428
emb-5	1.04346	0.99796	0.842779	0.583273	1.06054	0.996899	0.769057	0.427428
emb-8	1.01417	0.99796	1.17493	0.530819	0.882002	0.898666	1.15659	0.684359
emb-9	0.903106	0.99796	0.960534	0.932677	0.938808	0.996899	0.858009	0.656111
emb-27	1.13795	0.99796	0.933628	0.91053	1.03551	0.996899	0.732339	0.435206
emb-30	1.55253	0.0232089	1.08383	0.860901	1.29584	0.369402	0.966971	0.944233
sec-61.G	0.921171	0.99796	1.21568	0.630031	1.0593	0.996899	1.22255	0.607093
emr-1	1.10317	0.99796	0.877517	0.716177	1.1133	0.982295	0.999555	0.997932
end-3	1.06783	1	0.994584	1	0.952771	1	0.970556	1
ent-1	0.886946	0.99796	0.856067	0.590102	1.00742	0.996899	0.688846	0.157091
eor-1	1.09705	0.99796	0.948288	0.931214	1.14406	0.977797	0.712479	0.40584
eor-2	1.22563	0.99796	1.4211	0.242781	1.35302	0.70005	1.46882	0.298674
epi-1	0.976852	0.99796	1.26138	0.50725	1.0085	0.996899	1.11639	0.770507
epn-1	1.30888	0.944997	1.26723	0.584042	1.44113	0.447527	1.14615	0.776368
eps-8	0.82332	0.857833	0.902257	0.788304	0.857757	0.887126	0.749596	0.409026
erd-2.1	0.894191	0.99796	1.50682	0.423501	0.915713	0.996899	1.36369	0.561635
eri-1	1.29737	0.916607	0.901317	0.844982	1.17418	0.93966	0.789887	0.572426
erm-1	0.912064	0.99796	0.908233	0.741305	0.83793	0.598788	0.815607	0.537236
ero-1	0.938988	0.99796	1.03026	0.965446	0.927064	0.996439	0.923763	0.843679
F35A5.8	1.51941	0.282281	1.02469	0.976419	1.43687	0.367139	1.07498	0.898058
qars-1	0.931139	0.99796	0.95407	0.906865	0.963055	0.996899	0.831416	0.607413
ears-1	0.938075	0.99796	0.784073	0.309189	0.95926	0.996899	0.645168	0.0785069
ears-2	1.11007	0.99796	1.11537	0.829226	1.12343	0.981206	1.20064	0.651137
etr-1	1.00236	0.99796	1.08693	0.835746	1.06907	0.996899	0.978205	0.963465
fos-1	0.907484	0.99796	0.982414	0.976188	0.783495	0.657504	0.984607	0.977934
evl-14	1.11086	0.99796	0.838618	0.723393	1.08906	0.996899	0.689878	0.381797
evl-20	0.995225	0.99796	0.83768	0.757858	1.021	0.996899	0.818815	0.69362
exc-1	1.26661	0.99796	1.45753	0.701677	1.06103	0.996899	1.95607	0.333165
exc-4	1.12723	0.99796	1.27228	0.434676	1.02549	0.996899	1.30444	0.537236
exc-5	1.19638	0.99796	1.26214	0.570794	1.06762	0.996899	1.7718	0.15812
exc-7	1.3911	0.996269	1.5475	0.37406	1.19507	0.990084	1.62464	0.323972
exl-1	0.930298	0.99796	0.837128	0.573223	0.891479	0.957585	0.861301	0.72182
exo-3	0.967947	0.99796	0.793552	0.679586	1.02383	0.996899	0.579752	0.149383
exp-1	1.29955	0.99796	1.15232	0.931214	1.16593	0.996899	1.60033	0.585407
exp-2	0.806688	0.99796	0.854113	0.78328	0.884524	0.991646	1.07159	0.898512
eya-1	0.945407	0.99796	1.3006	0.827886	1.17615	0.996899	1.60439	0.646067
far-1	1.06429	0.99796	1.29773	0.405346	1.04641	0.996899	1.06319	0.902685
far-2	0.977578	0.99796	1.05418	0.91555	0.963277	0.996899	0.794888	0.518638
far-3	3.6488	0.00149863	7.29335	6.7092e-09	1.43113	0.851386	4.65488	0.00100157
far-5	0.848458	0.99796	2.8036	0.125735	0.815014	0.97084	3.24953	0.135725
far-6	1.12103	0.99796	1.25719	0.481262	1.13069	0.990084	0.894244	0.764868
far-7	1.52707	0.933336	2.78007	0.0154863	1.509	0.879492	3.15041	0.0699013
far-8	1.04316	0.99796	1.23325	0.540854	0.939103	0.996899	1.19951	0.68561
fat-1	1.24568	0.722598	1.70139	0.112603	1.22133	0.582629	1.72589	0.0591401
fat-2	2.08262	2.47622e-05	3.43551	2.21083e-09	2.05809	7.27997e-07	3.04073	5.61857e-09
fat-3	1.47013	0.23695	2.55612	0.00169638	1.8808	0.0209253	2.38992	0.00158844
fat-4	1.24627	0.737091	2.02478	0.00470725	1.12514	0.950755	1.83515	0.190115
fat-5	6.45403	7.08e-07	16.9577	5.56514e-19	8.7216	6.8248e-11	6.7269	8.55774e-05
fat-6	1.54159	0.604065	2.82062	0.00180401	1.97043	0.056758	1.85225	0.144005
fat-7	1.27826	0.98679	1.26311	0.587426	0.840952	0.966427	0.76381	0.507576
fax-1	1.33115	0.99796	1.9786	0.752101	1.64552	0.987785	2.79433	0.469751
fbf-1	1.20749	0.895589	0.968371	0.949085	1.19122	0.810279	0.965892	0.940265
fbf-2	0.936987	0.99796	0.86189	0.723553	0.961485	0.996899	0.849224	0.653661
fbl-1	0.435873	0.0557244	0.415389	0.115391	0.458488	0.27833	0.53895	0.318819
fbp-1	0.923438	0.99796	1.31569	0.509753	0.925451	0.996899	1.23411	0.647701
fce-1	0.93703	0.99796	1.01936	0.970608	0.954762	0.996899	0.987644	0.977934
fce-2	1.0015	0.99796	0.943221	0.907381	0.968629	0.996899	0.895912	0.78865
feh-1	0.817425	0.99796	0.486232	0.194954	0.718388	0.796746	0.904143	0.910459
fem-1	1.06857	0.99796	0.95597	0.924849	1.0147	0.996899	0.90784	0.802772
fem-2	1.06138	0.99796	0.857377	0.773339	1.03979	0.996899	0.751573	0.514993
fem-3	1.20141	0.99796	0.762841	0.767814	0.987723	0.996899	0.409298	0.0969761
fer-1	1.11478	0.99796	1.16948	0.829496	1.02315	0.996899	1.30571	0.496315
fib-1	0.748838	0.21654	0.723462	0.052656	0.786586	0.404909	0.652462	0.0661576
fis-1	0.810646	0.99796	0.80344	0.753305	0.811039	0.960418	0.660308	0.556738
fis-2	1.5355	0.161839	1.39526	0.342507	1.05304	0.996899	1.45255	0.556905
fkb-1	0.934411	0.99796	1.18883	0.705803	0.915581	0.996779	1.07552	0.880317
fkb-2	0.996061	0.99796	0.921469	0.797742	0.930699	0.990084	0.876944	0.697527
fkb-3	1.01096	0.99796	1.35246	0.751284	1.05652	0.996899	1.45674	0.640945
fkb-4	0.994846	0.99796	1.10757	0.940688	0.887286	0.996899	1.5042	0.607093
fkb-5	2.4893	0.308776	9.58281	0.000541333	2.9793	0.0872523	7.51364	0.0304637
fkb-6	0.855349	0.924645	0.892624	0.777951	0.87774	0.910632	0.75753	0.403109
fkb-7	8.45484	0.00725293	41.2443	7.00688e-08	7.71758	0.0161509	28.5688	0.000965827
fkb-8	1.04488	0.99796	1.26527	0.62738	1.08999	0.996899	1.35271	0.460521
fkh-3	5.4074	1	0.419778	1	5.66174	1	0.322077	1
fkh-4	3.89496	1	0.308242	1	0.291558	1	0.240682	1
fkh-6	1.09499	0.99796	1.17845	0.798094	1.1307	0.984548	1.38632	0.43592
fkh-7	1.5002	0.696279	2.5891	0.0299597	1.81239	0.10965	2.50516	0.0260847
fkh-8	0.721162	0.99796	1.11157	0.954374	0.798553	0.996899	1.55328	0.682296
fkh-9	1.02384	0.99796	0.834498	0.801309	1.06761	0.996899	0.887155	0.780482
fkh-10	1.5829	0.99796	1.89914	0.632132	1.50849	0.990084	2.8566	0.274898
fli-1	1.09629	0.99796	0.936928	0.90137	1.01433	0.996899	0.880909	0.773272
flp-1	1.13417	0.99796	1.53021	0.31837	1.05827	0.996899	1.40545	0.469607
flp-2	1.40309	0.884335	1.27018	0.705803	1.31326	0.895923	1.48318	0.426577
flp-3	1.07397	0.99796	1.35066	0.571691	1.19071	0.974932	1.15645	0.791621
flp-4	1.39035	0.868905	1.2859	0.643817	1.10496	0.996899	1.31353	0.599775
flp-5	1.09343	0.99796	1.28057	0.696557	1.08259	0.996899	1.40025	0.461822
flp-6	1.01536	0.99796	1.05499	0.936007	0.938697	0.996899	1.23429	0.63125
flp-7	1.32311	0.968495	1.45748	0.447733	1.45773	0.708085	1.55914	0.338522
flp-8	1.06566	0.99796	1.27901	0.717801	1.11303	0.996899	1.68165	0.242288
flp-9	1.26734	0.978916	1.20245	0.741305	1.15306	0.989469	1.54221	0.364378
flp-10	0.993652	0.99796	1.17048	0.737826	1.02049	0.996899	1.12324	0.79925
flp-11	1.03934	0.99796	1.11591	0.852881	1.08764	0.996899	1.43278	0.432847
flp-12	1.3301	0.898088	1.2861	0.56757	1.19049	0.963713	1.46232	0.333809
flp-13	1.13942	0.99796	1.26089	0.699162	1.14885	0.981206	1.3825	0.43346
flp-14	1.14024	0.99796	1.21044	0.649049	1.13846	0.974932	1.3531	0.469607
flp-15	1.3741	0.7789	1.38695	0.454323	1.18762	0.978474	1.39892	0.516511
flp-16	1.32289	0.733645	1.35731	0.367438	1.05822	0.996899	1.68213	0.0727555
flp-17	1.2279	0.99796	1.41771	0.375757	1.12982	0.990084	1.49275	0.318418
flp-18	1.09018	0.99796	1.18601	0.758309	1.03132	0.996899	1.65539	0.215363
flp-19	1.1071	0.99796	1.17933	0.806233	1.04725	0.996899	1.14642	0.838728
flp-20	0.953682	0.99796	0.936792	0.947065	1.10146	0.996899	1.28122	0.664974
flp-21	1.1484	0.99796	1.11954	0.867062	1.0078	0.996899	1.1438	0.826599
flr-1	0.765681	0.873788	0.861098	0.774547	0.70956	0.518987	0.845124	0.704157
flr-2	0.830419	0.99796	0.838094	0.824929	0.902225	0.996899	0.941069	0.927244
flr-4	0.85407	0.99796	0.65645	0.543915	0.805656	0.963713	0.650492	0.430073
baz-2	1.57945	0.476571	1.38332	0.593048	1.20581	0.973557	1.84993	0.276278
fmi-1	1.11153	0.99796	1.25704	0.752886	1.13039	0.996899	1.61527	0.34178
fmo-1	0.628258	0.524713	0.560542	0.47264	0.619245	0.383671	0.511682	0.291838
fmo-2	0.257315	0.474379	1.09515	0.973075	1.61393	0.974932	0.76192	0.830951
fmo-3	1.57772	0.789191	3.12109	1.41717e-05	1.71248	0.437833	3.81947	0.00694593
fmo-4	1.30381	0.98679	1.36945	0.642078	1.14855	0.991	1.63286	0.303904
fmo-5	1.10098	0.99796	1.37845	0.526703	1.47777	0.43051	1.5814	0.307379
fog-1	1.94514	0.161771	1.2454	0.786212	1.77666	0.235335	3.22888	0.0020804
fog-2	1.09987	0.99796	0.870803	0.802324	1.02921	0.996899	0.569195	0.113825
fog-3	3.20356	0.0207395	2.26412	0.21263	2.45475	0.157541	7.19226	2.86205e-10
fox-1	1.24126	0.99796	1.45412	0.442079	1.28521	0.895939	1.57436	0.370037
fre-1	1.13733	0.99796	1.05238	0.926063	1.25154	0.616936	0.890503	0.779403
frh-1	1.03186	0.99796	0.82645	0.740452	0.97547	0.996899	0.847393	0.744439
frk-1	0.855236	0.99796	0.820918	0.644984	0.886619	0.991	0.829065	0.724796
frm-1	0.86316	0.99796	0.756017	0.345573	0.925479	0.996439	0.739455	0.428536
frm-2	1.13312	0.99796	1.15631	0.874613	1.15233	0.996899	1.34413	0.627699
frm-3	1.13447	0.99796	1.43407	0.380512	1.24589	0.929531	1.64361	0.21339
frm-4	1.06771	0.99796	0.953805	0.922801	1.00938	0.996899	0.945901	0.904506
frm-5.1	1.03655	0.99796	1.7631	0.0984103	1.22754	0.883265	1.56911	0.409597
frm-7	0.859176	0.99796	0.779922	0.397488	0.894534	0.994776	0.81115	0.640515
frm-8	0.946951	0.99796	1.02564	0.976188	0.85225	0.978592	1.17259	0.748863
F31B12.3	0.981488	0.99796	0.771959	0.625671	0.920719	0.996899	0.892387	0.834749
frm-10	1.10494	0.99796	1.3407	0.333148	0.954837	0.996899	1.40958	0.489416
fars-1	0.887793	0.99796	0.918585	0.802298	0.901765	0.948253	0.854972	0.66214
fars-3	0.868382	0.977228	0.899437	0.735466	0.90755	0.959479	0.939011	0.86375
fsn-1	1.07197	0.99796	0.786341	0.694651	1.00672	0.996899	0.539405	0.0495281
ftn-1	3.1991	0.001826	3.13806	0.0179911	7.39532	3.96295e-18	4.17698	2.33475e-06
ftn-2	0.781802	0.974592	1.29667	0.617652	1.03798	0.996899	1.38648	0.582033
ftt-2	1.03111	0.99796	1.00932	0.985024	0.985118	0.996899	0.986141	0.976599
fum-1	0.996387	0.99796	1.02487	0.962641	0.9958	0.996899	0.926072	0.832351
fut-1	0.656058	0.274962	0.782179	0.574487	0.723931	0.59253	0.70448	0.450836
fut-2	0.858543	0.99796	0.858791	0.872251	0.836246	0.996779	0.390066	0.0932409
fut-4	0.727528	0.99796	0.36941	0.507414	0.622422	0.965953	0.29962	0.409108
fut-8	0.628876	0.0848522	0.758667	0.615581	0.605327	0.0318911	0.732178	0.489811
fzo-1	1.07426	0.99796	0.979237	0.970608	1.00847	0.996899	0.957792	0.922236
fzr-1	0.909521	0.99796	0.790562	0.47264	0.933337	0.996899	0.707969	0.355142
fzy-1	0.960579	0.99796	0.719943	0.403748	0.928769	0.996899	0.50128	0.0569717
gab-1	1.20373	0.99796	0.85108	0.923717	1.0602	0.996899	1.73703	0.587738
gad-1	1.03637	0.99796	0.851466	0.640454	1.07291	0.996899	0.69212	0.228752
xnd-1	1.11139	0.99796	0.744787	0.521925	1.067	0.996899	0.53058	0.0853533
gap-1	0.802145	0.99796	0.742799	0.575011	0.937716	0.996899	0.671813	0.429687
gap-2	1.06385	0.99796	0.970408	0.974273	1.08382	0.996899	1.0409	0.953186
gar-1	1.14143	0.99796	0.872737	0.893948	1.07309	0.996899	0.968815	0.965744
gar-2	1.02695	0.99796	1.02204	0.981917	0.893618	0.996899	1.26766	0.608613
gar-3	1.21631	0.99796	1.23931	0.718889	1.07967	0.996899	1.46806	0.484388
gas-1	0.963001	0.99796	0.862476	0.676366	1.03651	0.996899	0.734722	0.398494
gbh-1	0.903767	0.99796	1.47739	0.550065	1.13492	0.996779	1.36487	0.537236
gbh-2	0.485541	0.0059311	1.02178	0.978346	0.616265	0.211657	0.962581	0.945531
gck-1	1.26625	0.480955	1.07028	0.853948	1.18038	0.851386	0.991805	0.98554
gcs-1	1.07429	0.99796	1.04965	0.90298	1.02794	0.996899	1.06912	0.881427
gcy-1	1.51628	1	0.699688	1	0.841936	1	0.547002	1
gcy-2	1.51012	0.99796	0.891573	0.951808	1.02175	0.996899	0.943058	0.967539
gcy-3	2.45222	1	3.24192	1	1.51672	1	1.50907	1
gcy-4	3.66356	1	1.25788	1	2.81121	1	3.29409	1
gcy-5	0.184253	0.341165	0.313256	0.502009	0.252071	0.486458	0.562163	0.69186
gcy-7	0.82701	0.99796	1.15735	0.951808	0.374349	0.879492	1.11192	0.953174
gcy-8	0.985004	0.99796	0.495034	1	0.983747	0.996899	1.98771	0.559388
gcy-9	0.809128	0.99796	0.655111	0.738643	0.543917	0.878195	0.559262	0.565273
gcy-11	1.06986	0.99796	1.04162	0.967885	0.799337	0.965953	1.13006	0.838654
gcy-12	0.942168	0.99796	0.952616	0.938002	0.994228	0.996899	0.83807	0.715605
gcy-15	0.944389	0.99796	0.83914	0.86455	0.834664	0.996899	1.27612	0.751022
gcy-17	0.582198	0.99796	0.857839	0.956771	0.236611	1	0.717512	0.855291
gcy-18	0.973029	0.99796	1.4956	0.723743	0.705021	0.989469	1.36338	0.760987
gcy-19	3.49143	0.000199731	1.11019	0.922801	4.44337	3.08342e-08	1.76092	0.342809
gcy-20	1.03503	1	0.677555	1	1.00588	1	1.12337	1
gcy-21	1.12135	0.99796	1.43612	0.647231	1.30154	0.969191	1.87889	0.397464
gcy-22	1.65174	0.99796	2.16158	0.281538	1.77386	0.720277	2.62617	0.212285
gcy-23	0.881959	0.99796	0.934306	0.981917	1.07595	0.996899	0.991781	0.994061
gcy-31	1.17471	0.99796	1.07786	0.976188	0.995432	0.997139	1.03887	0.98217
gcy-32	1.2214	0.99796	1.63053	0.743314	1.60043	0.963713	2.40919	0.403553
gcy-33	1.21578	0.99796	1.05653	0.981576	1.42732	0.990084	1.80113	0.597525
gcy-34	0.914111	0.99796	0.835854	0.943508	0.89402	0.996899	0.96557	0.984161
gcy-35	0.905176	0.99796	0.933311	0.97163	0.758748	0.994776	1.33427	0.764645
gcy-36	1.3147	0.99796	0.75747	0.88901	0.937593	0.996899	1.31253	0.821945
gcy-37	0.742576	0.99796	0.813737	0.858998	0.686881	0.950877	0.854309	0.864389
gdi-1	1.03803	0.99796	1.23614	0.526973	1.06353	0.996899	1.22315	0.632112
gei-1	0.981998	0.99796	1.05063	0.95923	1.00671	0.996899	1.01935	0.978902
gei-3	0.903344	0.99796	0.713566	0.436544	0.905653	0.990084	0.728123	0.523805
gei-4	0.906489	0.99796	0.986387	0.976188	0.947538	0.996899	0.933719	0.853877
lin-66	1.04272	0.99796	1.28887	0.286334	0.990849	0.996899	1.14657	0.751101
gei-6	1.13306	0.99796	0.799982	0.568268	1.09553	0.995703	0.651029	0.218578
icl-1	0.756318	0.859887	0.919711	0.886114	0.928257	0.996439	1.04093	0.947036
gei-8	0.976414	0.99796	1.03479	0.951808	0.965709	0.996899	1.00187	0.995181
acdh-13	0.959069	0.99796	0.853659	0.663763	0.895437	0.974932	0.858192	0.685886
snpc-4	1.12276	0.99796	0.909761	0.783787	1.12036	0.947641	0.737653	0.311959
meg-3	1.53074	0.99796	0.708115	0.799357	1.18849	0.996899	0.606792	0.60612
gei-13	1.63379	0.760903	3.34754	0.000781512	1.82071	0.255261	3.10221	0.0412056
gei-14	1.32238	0.94992	0.869606	0.80171	1.22289	0.897757	0.558437	0.0862518
gei-15	1.07108	0.99796	1.06445	0.905665	0.941432	0.996899	1.30166	0.424679
gei-17	1.15978	0.99796	0.97834	0.970608	1.1463	0.939566	0.874207	0.73097
gei-18	1.40337	0.99796	1.62983	0.741305	1.32272	0.996899	1.82209	0.591487
gem-4	0.99821	0.99796	1.09949	0.874613	0.787467	0.859064	1.29034	0.709144
ges-1	0.805357	0.989128	1.26137	0.337362	0.869998	0.894569	1.11204	0.762347
gex-2	1.09139	0.99796	1.39446	0.526079	1.17314	0.965953	1.28972	0.563576
gex-3	1.07185	0.99796	0.965919	0.944681	1.06234	0.996899	0.857175	0.705241
gfi-1	0.526607	0.0165298	0.792544	0.628081	0.550197	0.0717139	0.628104	0.263767
gfi-2	0.912381	0.99796	0.837102	0.570794	0.831516	0.77637	0.812173	0.537236
gfi-3	1.8917	0.0251554	1.20425	0.668572	2.22071	5.80906e-05	0.816649	0.674434
nrde-4	1.20445	0.987783	0.812245	0.552971	1.09669	0.990084	0.798204	0.527677
gfl-1	1.048	0.99796	0.826618	0.692434	0.95817	0.996899	0.593037	0.150139
ggr-1	1.27857	0.99796	1.14891	0.946165	1.48204	0.983753	2.20667	0.386377
ggr-2	1.71166	0.99796	2.46831	0.299824	1.52288	0.957585	2.2246	0.404414
ggr-3	0.736948	0.99796	1.07689	0.968234	0.67128	0.977424	1.29178	0.795315
gip-1	1.11125	0.99796	0.98868	0.981917	1.11101	0.965953	0.906912	0.791109
C45G3.3	1.05449	0.99796	0.952671	0.945381	0.952767	0.996899	0.760947	0.529023
glc-1	0.675349	0.617485	0.963017	0.953927	0.885759	0.982295	1.12315	0.78907
glc-2	1.00613	0.99796	1.11857	0.908244	0.727151	0.870283	1.18673	0.738462
glc-3	1.14547	0.99796	0.74388	0.865816	0.646464	0.977797	1.12058	0.930631
glc-4	1.24068	0.99796	0.887879	0.89846	1.06402	0.996899	1.28876	0.653605
gld-1	0.942628	0.99796	0.661147	0.409025	0.927738	0.996899	0.376767	0.0138566
gld-2	0.876821	0.99796	0.701877	0.200994	0.874705	0.921267	0.667036	0.291718
gld-3	1.16706	0.99796	0.74645	0.573223	1.07656	0.996899	0.52137	0.112887
glh-1	1.06354	0.99796	0.910895	0.824089	1.09242	0.982295	0.798381	0.502238
glh-2	1.11564	0.99796	0.602219	0.27591	1.13355	0.994776	0.383832	0.0231094
glh-3	1.11125	0.99796	0.746551	0.549518	1.03789	0.996899	0.587995	0.164474
glh-4	0.92518	0.99796	0.840329	0.604691	0.967907	0.996899	0.890946	0.776619
gln-1	0.710523	0.594109	0.827054	0.692135	0.880268	0.995371	0.928355	0.888991
gln-2	0.733424	0.276282	0.796112	0.526807	0.759419	0.446056	0.68214	0.567781
gln-3	1.10314	0.99796	1.42813	0.436168	1.01781	0.996899	1.4744	0.390507
gln-4	0.916625	0.99796	0.923939	0.938002	0.861108	0.996899	1.12055	0.895451
gln-5	1.021	0.99796	0.496742	0.495955	0.819009	0.996899	0.28434	0.0571806
gln-6	1.09932	0.99796	0.614551	0.641313	0.919577	0.996899	0.331558	0.077106
R07B1.8	0.709421	0.99796	0.478957	0.674213	0.672176	0.978502	0.726013	0.799211
glp-1	1.03125	0.99796	0.704748	0.399922	0.930282	0.996899	0.578247	0.142895
glr-1	0.914377	0.99796	1.08786	0.954993	1.09943	0.996899	1.26772	0.786752
glr-2	2.08965	0.672934	1.69856	0.601011	2.67369	0.0969719	1.8032	0.444363
glr-3	0.668643	0.99796	0.856039	0.954993	0.504144	1	1.14114	0.943884
glr-4	0.586797	0.686077	0.875922	0.90137	0.480475	0.24409	0.980919	0.982958
glr-5	1.10878	0.99796	1.0849	0.936335	1.10953	0.996899	1.34171	0.630434
glr-6	1.17553	0.99796	1.35701	0.563162	0.997339	0.996899	1.39266	0.555888
glr-8	1.00627	0.99796	0.996234	1	0.903452	1	1.41965	0.846649
glt-1	0.967348	0.99796	1.5268	0.358804	1.04185	0.996899	1.449	0.439952
glt-3	1.13004	0.99796	1.11395	0.881387	0.840331	0.970215	1.2458	0.638603
glt-4	0.884889	0.99796	0.95997	0.954353	0.954561	0.996899	1.12433	0.802874
glt-5	0.7955	0.99796	0.465537	0.0331059	0.628848	0.532876	0.943055	0.961649
glt-6	0.772989	0.99796	0.808822	0.805347	0.651476	0.891443	1.125	0.861799
glt-7	1.11519	0.99796	1.18892	0.88774	0.982082	0.996899	1.41675	0.654225
gly-1	2.97849	0.32896	4.57392	0.00473597	3.11338	0.177223	4.68145	0.0391887
gly-2	0.917736	0.99796	0.621357	0.326978	0.798484	0.884051	0.642681	0.435206
gly-3	1.12154	0.99796	1.28863	0.521925	1.13083	0.963713	1.1348	0.769659
gly-4	0.719932	0.33059	0.750513	0.271146	0.721002	0.301357	0.746891	0.399397
gly-5	0.827638	0.805024	1.05804	0.879085	0.834736	0.748586	0.856012	0.637742
gly-6	1.64443	0.354223	3.76891	3.93113e-05	1.57679	0.189505	2.88998	0.0450374
gly-7	0.976831	0.99796	1.28206	0.521925	1.07636	0.996899	1.13305	0.814257
gly-8	0.989846	0.99796	1.75716	0.435355	1.08715	0.996899	1.67386	0.489865
gly-10	1.02788	0.99796	0.917331	0.838506	0.943462	0.996899	0.808595	0.503504
gly-11	2.07206	0.388986	7.09559	0.000160409	2.24932	0.207936	6.31246	0.00995249
gly-12	1.17434	0.99796	1.85647	0.194044	1.17827	0.990084	1.58345	0.441589
gly-13	0.87981	0.99796	0.789798	0.581135	0.969729	0.996899	0.721717	0.387977
gly-14	1.02876	0.99796	1.49182	0.674213	1.34633	0.975763	1.33811	0.72182
gly-15	1.14984	0.99796	0.565016	1	0.999852	1	1.61248	0.785667
gly-18	0.40303	0.657358	0.253661	0.24277	0.293436	0.136604	0.540323	0.624104
gly-19	0.917073	0.99796	1.34008	0.597741	1.12603	0.996439	1.50491	0.378121
gly-20	1.15657	0.99796	0.90457	0.790405	1.05157	0.996899	0.738474	0.346388
gna-1	1.04176	0.99796	2.03818	0.154897	1.05611	0.996899	1.97585	0.27626
gna-2	1.24113	0.99796	0.703572	0.748712	1.00683	0.996899	0.362373	0.0488248
goa-1	1.03517	0.99796	1.03034	0.9454	0.974224	0.996899	0.968707	0.942099
gob-1	1.00707	0.99796	1.2556	0.458098	1.03954	0.996899	1.23401	0.565273
gon-1	0.843358	0.99796	0.932979	0.918631	0.795293	0.853719	0.879814	0.790065
gon-2	0.842461	0.973785	1.03683	0.941118	0.92791	0.996439	1.03596	0.939488
gon-4	1.23154	0.99796	0.851478	0.744813	1.18557	0.940893	0.729146	0.403109
gop-1	0.965956	0.99796	0.893878	0.835768	0.888987	0.989469	0.952459	0.92676
gop-2	0.907622	0.99796	0.692346	0.145114	0.924028	0.996899	0.799071	0.551095
gop-3	1.06812	0.99796	1.02673	0.960159	1.0637	0.996899	0.973448	0.956724
gpa-1	1.96643	0.407924	0.980034	0.98867	2.88611	0.00923436	0.785794	0.797203
gpa-2	1.05566	0.99796	1.11122	0.954955	0.753359	0.996899	1.95452	0.433394
gpa-3	1.17539	0.99796	1.15977	0.910648	0.99901	0.996899	1.32937	0.738007
gpa-4	0.819793	0.99796	1.01853	0.995564	1.21433	0.996899	0.980033	0.990534
gpa-5	0.818762	1	1.27256	1	0.903121	1	1.22438	0.923838
gpa-6	0.723233	1	0.52425	1	0.629377	1	1.19179	1
gpa-7	1.12172	0.99796	0.945212	0.949857	0.980867	0.996899	1.23647	0.686401
gpa-9	2.86817	0.9852	3.12159	0.603256	2.66094	0.899431	1.32106	1
gpa-10	1.11659	0.99796	0.810299	0.950322	0.643206	1	0.840502	0.941326
gpa-11	1.37397	0.99796	1.44945	0.87017	1.69	0.978592	1.08536	0.969925
gpa-12	0.741114	0.902585	0.588545	0.148285	0.645179	0.660657	0.875171	0.87389
gpa-13	0.669745	1	1.07407	1	1.11335	1	1.71267	1
gpa-14	1.12906	0.99796	1.01038	0.996511	0.781295	0.996899	1.22425	0.886158
gpa-15	0.75196	0.99796	1.08254	0.968234	0.490902	0.850187	1.43786	0.712291
gpa-16	0.973268	0.99796	0.850679	0.656714	0.990473	0.996899	0.923958	0.852865
gpb-1	1.01297	0.99796	1.13785	0.708362	0.985818	0.996899	1.04411	0.923686
gpb-2	1.14842	0.99796	1.20185	0.707178	1.11204	0.996439	1.35912	0.458309
gpc-1	0.958486	0.99796	1.07703	0.967054	0.984791	0.996899	1.68382	0.542763
gpc-2	0.997896	0.99796	1.08489	0.845095	1.01451	0.996899	1.15532	0.674554
gpd-1	1.04793	0.99796	0.694636	0.656714	1.05432	0.996899	0.432563	0.0837071
gpd-2	1.07172	0.99796	1.34139	0.456135	1.02851	0.996899	1.29397	0.556738
gpd-3	1.08876	0.99796	1.28528	0.558986	1.10113	0.990084	1.20634	0.678274
gpd-4	1.17286	0.99796	0.765269	0.638772	1.15442	0.977797	0.602921	0.336486
gpn-1	0.743535	0.99796	1.17728	0.923574	0.779417	0.990084	1.47928	0.698544
gpr-1	1.17708	0.99796	1.10114	0.861586	1.15942	0.970122	1.06315	0.903072
gpr-2	1.03854	0.99796	1.10127	0.820982	0.994814	0.996899	0.991203	0.98554
grd-1	2.22573	0.469591	4.53095	0.00124768	2.81991	0.114009	4.14239	0.0553512
grd-2	1.75299	0.920102	2.11327	0.315899	1.923	0.684357	1.94717	0.428536
grd-3	7.97735	0.517163	11.2096	0.0115984	2.05951	0.911119	7.97625	0.0140225
grd-4	0.677058	1	0.915558	1	0.897033	1	1.15102	1
grd-5	0.674185	0.194086	0.518883	0.342507	0.601762	0.00012601	0.700171	0.559497
grd-6	0.4471	0.250096	0.2428	0.770048	0.317444	0.703258	0.326076	0.643977
grd-7	0.562657	1	0.695728	1	0.578695	1	1.78728	1
grd-9	1.33878	1	1.59226	1	1.97888	1	2.75961	0.509239
grd-10	10.635	0.973785	25.507	0.502009	4.4489	0.859791	17.3994	0.461296
grd-11	0.897859	0.99796	0.417352	0.584042	1.50609	0.989741	0.342145	0.4101
grd-12	1.99015	0.728791	2.54793	0.0609871	2.48712	0.105401	2.9434	0.123709
grd-13	5.78894	0.125543	10.5486	0.0138092	2.74922	0.858335	9.00037	0.00031694
grd-14	0.434653	2.0699e-06	0.222618	0.603044	0.384436	0.0165155	0.414829	0.70325
grd-15	0.922876	0.99796	0.470776	0.666284	0.814942	0.996439	0.57932	0.640199
grd-16	1.20823	0.99796	3.50082	0.146591	1.64214	0.978352	3.36202	0.268753
grh-1	1.76127	0.293912	3.75123	0.00022378	1.95741	0.109358	3.2319	0.101457
grk-1	0.97395	0.99796	1.00028	0.997217	1.0432	0.996899	1.04429	0.933898
grk-2	1.09313	0.99796	1.1378	0.844348	1.0731	0.996899	1.26428	0.623281
grl-1	0.804206	0.99796	0.331201	0.56979	0.809844	0.996779	0.540867	0.710286
grl-2	2.53028	0.516663	2.98551	0.109778	2.36943	0.437427	4.12228	0.0439202
grl-3	0.266901	1	0.959983	1	0.681031	1	0.677559	0.84717
grl-4	0.415064	0.99796	0.300246	0.757858	0.245849	0.853719	0.440622	0.777889
grl-5	3.96716	0.021067	4.13182	0.00104294	3.9889	0.00417958	4.52849	0.00356026
grl-6	0.535537	0.99796	0.197742	0.600149	0.421518	0.947985	0.77411	0.898531
grl-7	4.34374	0.010169	6.62854	7.51564e-08	4.81411	0.0040423	6.48333	0.00167181
grl-8	0.6153	0.979916	0.609749	0.639031	0.710254	0.990084	0.796985	0.837119
grl-9	1.28733	0.99796	0.806095	1	1.43692	0.996899	0.992059	0.995264
grl-10	4.60376	0.0083554	8.34794	1.95019e-13	6.1024	0.000112004	8.56248	0.00139687
grl-12	1.57043	0.99796	2.46769	0.350202	1.78958	0.867355	2.61407	0.340234
grl-13	0.370744	1	0.475502	1	0.506501	1	0.678482	1
grl-14	3.52992	0.00532267	7.47055	9.49792e-10	3.35613	0.0745139	8.95108	0.00178551
grl-15	6.92613	6.55339e-05	17.2826	4.88499e-27	9.8191	2.91061e-06	16.8587	3.55268e-06
grl-16	0.65036	0.724656	0.356626	0.43818	0.625434	0.424793	0.473954	0.479058
grl-17	4.07196	0.466953	10.2309	0.000267187	3.9525	0.437653	5.9382	0.0476322
grl-18	2.14324	0.91889	1.7965	0.678114	1.93701	0.851386	2.01107	0.508358
grl-21	0.580291	0.99796	0.168837	0.682408	0.485157	0.996899	0.741408	0.945928
grl-22	0.834512	0.99796	0.368673	0.505592	0.678441	0.957585	0.563111	0.63125
grl-25	0.552297	1	0.837212	1	1.18409	0.996899	0.200337	1
grl-27	0.635392	0.0546772	0.206184	0.657042	0.231863	0.00123668	0.506353	0.778937
grl-28	0.385277	0.902465	0.0883501	0.271512	0.189202	0.349045	0.133477	0.386851
grl-30	0.296564	0.220905	0.0234023	0.000177975	0.16232	0.123493	0.250605	0.43592
gro-1	1.15678	0.99796	0.906351	0.874906	1.106	0.996439	0.674997	0.33621
grp-1	1.10526	0.99796	1.1585	0.812894	0.985645	0.996899	0.861041	0.74441
gars-1	1.03402	0.99796	1.18919	0.568736	1.05585	0.996899	0.984227	0.977608
gsa-1	0.860129	0.99796	1.15333	0.759609	0.89922	0.990084	0.955942	0.935029
gsk-3	0.989484	0.99796	0.995053	0.991795	0.937358	0.996899	1.00711	0.986412
gsp-1	0.963479	0.99796	0.899638	0.742025	0.923682	0.989469	0.913797	0.795636
gsp-2	1.01222	0.99796	0.975323	0.954837	1.05037	0.996899	0.9218	0.832459
gst-1	0.662964	0.0616786	0.825662	0.532403	0.749777	0.123697	0.668146	0.263996
gst-2	2.24214	0.99796	1.86742	1	1.70609	1	2.28576	1
gst-3	1.29481	0.99796	1.45268	0.706106	1.09754	0.996899	1.53936	0.595605
gst-4	0.628202	0.579026	0.741037	0.62738	0.814163	0.963534	1.30793	0.638802
gst-5	0.459757	3.94653e-06	0.855703	0.620645	0.57972	0.00830174	0.898233	0.864108
gst-6	0.386731	1.47906e-05	0.570881	0.0336466	0.429467	9.14821e-05	0.603646	0.249497
gst-7	0.584087	0.0470086	0.76992	0.537219	0.65173	0.129569	0.748326	0.530856
gst-9	0.591079	0.99796	0.84115	0.923237	0.799844	0.996899	0.608573	0.630514
gst-10	0.34822	0.000175412	0.563825	0.161234	0.507052	0.0103815	0.854096	0.741509
gst-11	1.05563	0.99796	1.39455	0.779289	0.875849	0.996899	1.53397	0.632887
gst-12	1.44719	0.99796	3.02702	0.249535	1.27877	0.996899	8.22645	0.019551
gst-13	0.431218	0.0611536	0.708251	0.635232	0.476934	0.0750786	0.850738	0.841813
gst-14	34.0985	1	182.594	0.00572711	6.96574	1	258.722	0.00144153
gst-15	0.994545	0.99796	0.816542	0.880833	0.953181	0.996899	1.00313	0.994673
gst-16	0.786518	0.99796	0.805202	0.865816	1.09541	0.996899	1.16728	0.870725
gst-19	1.17491	0.99796	3.25757	0.377118	1.33983	0.996899	2.87756	0.425526
gst-20	0.32537	2.96e-10	0.888495	0.765879	0.450433	0.00092452	0.883517	0.875994
gst-21	1.54962	0.99796	2.1352	0.500331	1.42637	0.968352	2.81893	0.270036
gst-22	1.05837	0.99796	0.883036	0.883693	0.695979	0.491039	1.55176	0.417763
gst-23	1.1193	0.99796	0.680541	0.768621	1.1501	0.996899	0.978198	0.98554
gst-24	1.79616	0.730386	2.38612	0.219085	2.06507	0.393792	3.61476	0.00295557
gst-25	0.558734	0.99796	0.117384	0.48948	0.337963	0.974463	1.0965	0.978539
gst-26	0.73174	0.751876	0.989642	0.986969	0.650418	0.128631	0.921322	0.891877
gst-27	0.770944	0.848291	1.04891	0.935448	0.728837	0.369402	1.09211	0.893989
gst-28	0.340683	1.37e-07	0.647099	0.112608	0.343544	0.000112004	0.599036	0.161346
gst-29	0.304231	0.00378452	0.789371	0.731913	0.56995	0.755254	0.685665	0.598828
gst-30	0.755731	1	0.354926	1	0.357361	1	1.23742	0.931654
gst-31	2.58575	1	2.93313	1	1.97187	1	3.25003	1
gst-32	0.353104	1	1.83152	0.776929	0.370444	1	1.27487	0.902891
gst-33	0.880225	0.99796	0.797884	0.853948	0.752641	0.986533	1.28893	0.754808
gst-34	1.82711	1	1.86739	1	2.02526	1	11.2067	1
gst-35	1.00279	0.99796	0.732727	0.776929	1.45673	0.783904	1.00965	0.989667
gst-36	0.66533	0.0556667	0.821984	0.497632	0.659104	0.0208934	0.878165	0.731851
gst-38	0.0930898	3.46e-10	0.223887	0.000732595	0.0641101	3.2406e-12	0.288139	0.129759
gst-39	0.62934	0.462258	1.09941	0.879715	0.570699	0.123202	1.10362	0.881427
gst-40	1.17439	0.99796	0.787002	0.837477	1.0238	0.996899	1.03368	0.974582
gst-41	35.3493	1	62.3742	1	22.9174	1	49.9383	1
gst-42	0.675041	0.878834	1.06911	0.944522	0.772652	0.916054	1.00746	0.992681
gst-43	0.956093	0.99796	1.21719	0.772603	0.99091	0.996899	1.73753	0.305378
gst-44	1.62983	0.99796	1.46895	0.854632	0.629456	1	2.21582	0.516329
gsy-1	0.951698	0.99796	1.12901	0.754174	0.97238	0.996899	1.01993	0.971657
gta-1	0.882591	0.99796	2.66415	1.1411e-05	0.977002	0.996899	1.7394	0.0466215
gtl-1	0.593015	0.499109	0.740076	0.636705	0.610682	0.638007	0.576785	0.310161
gtl-2	1.46065	0.885466	1.42113	0.611212	1.1547	0.996899	1.85516	0.200244
lite-1	1.16061	0.99796	1.19462	0.844348	1.09591	0.996899	1.678	0.443778
gur-4	2.47414	0.578588	2.47991	0.391246	1.8303	0.936207	4.17741	0.123191
gur-5	2.01156	1	1.61786	1	2.19938	1	3.27241	0.453041
gut-2	0.922059	0.99796	0.785912	0.5692	0.827191	0.915375	0.648414	0.257866
haf-1	1.04493	0.99796	1.79943	0.261812	1.04579	0.996899	2.25651	0.0395207
haf-2	1.26978	0.944639	1.28546	0.500817	1.10229	0.990084	1.59308	0.345275
haf-3	1.02479	0.99796	0.991358	0.986101	0.973604	0.996899	0.971548	0.950157
haf-4	0.930965	0.99796	1.28416	0.35745	1.05546	0.996899	1.17487	0.762766
hmt-1	0.978332	0.99796	0.863173	0.667453	1.06664	0.996899	0.854073	0.668201
haf-6	1.02928	0.99796	1.09708	0.867915	1.02358	0.996899	1.09315	0.884197
haf-7	0.86737	0.99796	3.21038	0.089378	0.848069	0.963713	1.93763	0.0679546
haf-9	0.863884	0.99796	1.06971	0.893795	0.997063	0.996899	1.04463	0.935029
ham-1	1.15514	0.99796	1.33455	0.851635	0.873201	0.996899	2.08636	0.326494
ham-2	0.831483	0.99796	0.734429	0.737826	0.801302	0.996439	0.7909	0.82221
hap-1	1.04648	0.99796	0.98596	0.984834	1.19433	0.937062	0.972384	0.963344
hbl-1	1.40457	0.99796	2.57977	0.120121	1.60169	0.73462	2.06778	0.285091
hcf-1	1.13294	0.99796	0.838573	0.692434	1.07134	0.996899	0.751254	0.468099
hcp-1	1.0316	0.99796	0.800454	0.703107	1.03181	0.996899	0.542572	0.148104
hcp-2	0.991698	0.99796	0.87316	0.754816	1.02467	0.996899	0.960234	0.95711
hcp-3	0.983466	0.99796	0.795326	0.601358	0.98954	0.996899	0.644538	0.246877
hcp-4	1.20578	0.99796	0.89778	0.832724	1.15081	0.957585	0.654255	0.289935
hcp-6	1.17492	0.99796	0.908545	0.871205	1.14752	0.977797	0.689896	0.37011
hda-1	1.10519	0.99796	0.884859	0.774547	1.02238	0.996899	0.761972	0.469669
hda-2	1.25912	0.99796	0.844354	0.767678	1.15188	0.982295	0.78823	0.60862
hda-3	1.17779	0.99796	0.918579	0.876989	1.15895	0.957585	0.930767	0.888769
hda-4	0.872249	0.99796	0.963299	0.954128	1.01086	0.996899	0.92738	0.854724
hda-10	1.17671	0.99796	0.979636	0.976949	1.24759	0.812502	0.774976	0.527677
hdl-1	0.817171	0.99796	0.763974	0.6544	0.859147	0.952628	0.585978	0.518974
hel-1	0.934858	0.99796	0.890811	0.739964	0.90919	0.961083	0.871081	0.703153
hen-1	1.07249	0.99796	0.4785	1	0.58427	1	1.12899	0.957275
hgo-1	0.755429	0.617485	1.05206	0.916495	0.714027	0.206844	1.08994	0.836856
hid-1	0.854033	0.99796	1.02395	0.974273	0.849003	0.956741	0.995123	0.992681
hif-1	1.01417	0.99796	1.15509	0.627381	0.983814	0.996899	1.24385	0.5206
hil-1	1.21091	0.99796	0.688322	0.767819	1.33287	0.996439	0.563274	0.563976
hil-2	1.52698	0.139858	1.16206	0.674213	1.62646	0.0706911	1.64018	0.0450374
hil-3	2.55512	0.02444	1.45153	0.604871	3.69506	5.93607e-07	2.49069	0.0560652
hil-4	1.05536	0.99796	0.878666	0.727423	1.04829	0.996899	0.722209	0.286203
hil-5	1.0555	0.99796	0.876104	0.64785	1.03474	0.996899	0.854664	0.643977
hil-7	1.27508	0.99796	0.95998	0.981576	1.15467	0.996899	1.1185	0.914423
hil-8	0.707702	0.99796	0.770772	0.909769	0.674802	0.993707	1.33294	0.823924
him-1	1.14755	0.99796	0.903338	0.816235	1.03419	0.996899	0.684966	0.245863
him-3	1.02447	0.99796	0.793591	0.421049	1.00559	0.996899	0.890908	0.778937
him-4	0.913791	0.99796	1.14936	0.676366	0.956454	0.996899	1.17469	0.632247
him-5	1.272	0.99796	0.914475	0.92295	1.25949	0.918146	0.676304	0.475794
him-6	1.17356	0.99796	0.876093	0.797432	1.15928	0.965953	0.738563	0.465282
him-8	1.23353	0.99796	0.821734	0.753305	1.18339	0.977797	0.546193	0.160123
him-10	1.18116	0.99796	0.831998	0.684476	1.05673	0.996899	0.658164	0.263278
him-14	1.30275	0.973785	0.993559	0.995256	1.22245	0.918146	0.842163	0.750851
him-17	1.12725	0.99796	0.826357	0.660592	1.07993	0.996899	0.633908	0.185652
his-1	1.25244	0.99796	2.04402	0.583273	3.16245	0.293707	1.03985	0.98217
his-2	1.90471	0.944997	1.82654	0.615517	3.7979	0.0418288	1.42838	0.771531
his-3	2.17287	0.453016	2.29963	0.186593	3.26837	0.028606	1.99455	0.296153
his-4	2.31908	0.270933	3.4097	0.00205417	4.37867	0.00298387	2.17601	0.196359
his-5	1.8892	0.601045	3.30074	0.00125262	4.60465	0.000130729	2.37971	0.0898106
his-6	1.83441	0.59082	2.68534	0.0110449	4.5783	3.29158e-06	2.31439	0.0982274
his-7	2.78907	0.196791	3.07196	0.0652766	5.35219	0.000961205	3.14875	0.0573953
his-8	3.11395	0.0277104	4.34348	5.95267e-07	7.43151	2.77562e-06	3.94181	9.35972e-05
his-10	1.70289	0.99796	3.76999	0.103542	3.67469	0.190633	4.3008	0.0412207
his-11	1.32838	0.99796	2.67441	0.0330359	2.40199	0.0479295	2.48776	0.0855625
his-12	2.40451	0.99796	2.90787	0.738101	5.37219	0.620621	3.34638	0.616964
his-14	1.70289	0.99796	3.76999	0.103542	3.67469	0.190633	4.3008	0.0412207
his-16	0.651418	0.99796	2.08219	0.918379	0.00401212	0.784255	1.05399	0.994525
his-17	2.57879	0.355883	5.02286	0.0042251	5.13173	0.00840784	4.0885	0.0283229
his-18	1.97623	0.997826	4.37149	0.0398525	5.24669	0.0118979	3.38527	0.147059
his-19	2.20646	0.571308	2.48555	0.230372	4.26437	0.0053027	2.70162	0.147459
his-20	2.3738	0.831857	3.81408	0.118344	6.23285	0.0185416	3.84933	0.115025
his-21	2.20646	0.571308	2.48555	0.230372	4.26437	0.0053027	2.70162	0.147459
his-22	2.3738	0.831857	3.81408	0.118344	6.23285	0.0185416	3.84933	0.115025
his-24	1.5543	0.643501	1.58112	0.498459	1.86737	0.161539	2.00973	0.0858926
his-25	1.70197	0.352906	3.44905	0.000153365	2.83977	0.000679581	3.54819	0.000398042
his-26	1.70289	0.99796	3.76999	0.103542	3.67469	0.190633	4.3008	0.0412207
his-28	2.85426	1	6.67042	0.264851	7.50846	0.237692	4.55241	0.422325
his-31	0.613149	1	1.58009	1	3.6658	0.505825	1.84635	1
his-32	2.67309	0.592166	1.23488	0.920604	7.86274	4.1191e-05	1.89842	0.590082
his-35	1.04735	0.99796	1.43889	0.331377	1.31443	0.703258	1.43701	0.429737
C50F4.6	2.68412	0.0322308	1.63978	0.526079	4.4596	1.36131e-06	2.09655	0.238079
his-37	0.883748	0.99796	1.21965	0.654503	1.83441	0.0109749	1.61572	0.130628
his-38	0.89712	0.99796	0.859506	0.938002	1.84721	0.621743	0.848687	0.912714
his-40	1.87485	0.78746	1.36021	0.827886	4.92716	0.00286293	1.29772	0.840435
his-41	1.08377	0.99796	1.71027	0.143565	1.58838	0.208398	1.58129	0.34178
his-43	2.40451	0.99796	2.90787	0.738101	5.37219	0.620621	3.34638	0.616964
his-45	1.11973	0.99796	3.49679	0.837251	1.66614	0.996899	1.52584	0.96388
his-46	1.12805	0.99796	2.13283	0.664614	2.19116	0.870715	1.92448	0.643977
his-48	1.09825	0.99796	1.46377	0.498806	1.84817	0.101109	1.24183	0.722784
his-50	2.85426	1	6.67042	0.264851	7.50846	0.237692	4.55241	0.422325
his-51	2.20646	0.571308	2.48555	0.230372	4.26437	0.0053027	2.70162	0.147459
his-52	2.3738	0.831857	3.81408	0.118344	6.23285	0.0185416	3.84933	0.115025
his-53	2.20646	0.571308	2.48555	0.230372	4.26437	0.0053027	2.70162	0.147459
his-54	2.3738	0.831857	3.81408	0.118344	6.23285	0.0185416	3.84933	0.115025
his-55	1.83991	0.453165	1.47993	0.776059	2.51122	0.0706582	2.39764	0.0564001
his-56	1.12805	0.99796	2.13283	0.664614	2.19116	0.870715	1.92448	0.643977
his-57	4.52289	1	2.27578	1	11.5267	1	6.23402	1
his-58	2.29112	0.406418	2.08085	0.381528	3.26583	0.0836849	0.96969	0.980587
his-59	1.95073	0.217065	2.07543	0.0161105	3.14404	1.8558e-05	1.91366	0.0858926
his-60	1.74255	0.505477	2.0179	0.0849196	2.77078	0.00951311	2.06757	0.113147
his-61	1.36311	0.951894	1.6397	0.242451	2.52681	0.000697624	1.20313	0.776368
his-62	1.22708	0.99796	1.76633	0.401149	1.85069	0.496358	1.27917	0.768855
his-63	1.16899	0.99796	0.691261	0.752886	1.91416	0.537537	1.15289	0.891242
his-64	1.39721	0.99796	1.19714	0.916495	1.52769	0.961083	1.42699	0.742486
his-65	1.56204	0.466953	1.62721	0.326543	2.83175	8.83457e-06	1.43878	0.574671
his-66	0.936835	0.99796	1.35698	0.758945	2.21384	0.0706582	1.72507	0.477661
his-67	0.903763	0.99796	0.381726	1	1.16548	0.996899	0.56079	0.740324
his-68	1.18355	0.99796	0.786619	0.707425	1.42256	0.717813	0.854209	0.825805
his-69	2.16509	1	1.25416	1	1.37238	1	3.26952	1
his-70	0.754969	0.99796	0.840096	0.799542	0.735954	0.867355	1.08047	0.898512
his-71	1.0852	0.99796	1.26208	0.602463	1.21451	0.904857	1.25846	0.578095
his-72	1.18123	0.99796	1.18848	0.62738	1.35574	0.374049	0.978849	0.970274
his-73	1.76289	0.99796	1.50683	0.838506	1.3183	0.996899	1.37711	0.851847
hlh-1	1.43474	0.99796	1.67409	0.489241	1.49336	0.796282	2.19228	0.0862518
hlh-2	1.32795	0.99796	1.04081	0.976949	1.10778	0.996899	0.988288	0.988577
hlh-3	1.62166	1	0.672948	1	1.71338	1	1.37499	1
hlh-4	0.91768	0.99796	0.652978	0.799542	0.528329	0.906208	1.42136	0.75392
hlh-6	2.33435	0.761073	1.81276	0.668401	2.85419	0.518987	2.8782	0.318819
hlh-8	1.65516	0.984511	2.01054	0.56757	1.45704	0.963072	2.70404	0.296609
hlh-10	3.05093	1	2.60756	1	2.37717	1	2.82981	1
hlh-11	0.980566	0.99796	1.33419	0.291198	0.967649	0.996899	1.28819	0.465172
hlh-19	1.32111	0.99796	1.2471	1	1.5192	1	0.967895	1
btb-1	0.426554	0.974386	0.629905	0.816087	0.575631	0.963713	0.9522	0.976313
hmg-1.1	1.14769	0.975788	1.02865	0.949711	1.19884	0.785292	0.935286	0.849693
hmg-1.2	1.02684	0.99796	0.979884	0.967054	0.969758	0.996899	1.02094	0.962688
hmg-3	1.16333	0.99796	0.871055	0.753912	1.09148	0.996779	0.855416	0.715636
hmg-4	1.05543	0.99796	0.999557	0.99774	1.04471	0.996899	0.884954	0.802616
hmg-5	1.0254	0.99796	0.754916	0.351066	0.987526	0.996899	0.691359	0.276395
hmg-11	1.53178	0.769779	2.33236	0.0679554	1.6288	0.500895	2.45392	0.0757082
hmg-12	1.07057	0.99796	0.929672	0.843106	1.07606	0.990084	0.884163	0.70919
hmp-1	1.24629	0.868551	1.20999	0.670902	1.17851	0.891443	1.10834	0.878737
hmp-2	1.18963	0.99796	1.06773	0.908244	1.15579	0.957585	0.902316	0.850222
hmr-1	1.25029	0.902801	1.57289	0.127363	1.35032	0.513586	1.42156	0.494192
hoe-1	1.11276	0.99796	0.879705	0.8495	1.03035	0.996899	0.717083	0.306856
hog-1	1.06878	0.99796	1.11042	0.923237	1.04096	0.996899	1.19642	0.79925
hop-1	1.27859	0.99796	0.760046	0.727423	1.07816	0.996899	0.549214	0.318089
hot-1	0.835662	0.99796	0.768863	0.692434	0.77379	0.911119	1.07274	0.917379
hot-2	1.33384	0.99796	1.09921	0.958523	1.08731	0.996899	1.16058	0.902396
hot-4	1.4774	0.99796	1.10438	0.946002	1.0919	0.996899	1.49071	0.61237
hot-5	0.945499	0.99796	1.02857	0.985819	1.15906	0.996899	1.69016	0.548391
hot-6	1.38072	0.99796	1.42761	0.680235	1.30362	0.985651	1.43386	0.668672
hot-7	0.584372	1	1.46781	1	1.15886	1	1.7623	0.728447
hpd-1	1.15961	0.99796	1.24936	0.644984	0.864351	0.991002	1.41188	0.486272
hpk-1	0.907162	0.99796	1.27376	0.421366	0.965185	0.996899	1.17344	0.69327
hpl-1	1.26992	0.99796	1.74316	0.406526	1.51277	0.887126	2.09612	0.18577
hpl-2	1.01203	0.99796	0.880083	0.706426	0.996313	0.996899	0.733293	0.296153
hpr-9	1.26774	0.978629	0.833548	0.703966	1.12207	0.990084	0.651206	0.282176
hpr-17	1.21661	0.99796	0.890272	0.84966	1.13497	0.990084	0.603245	0.214183
hrpa-1	0.928958	0.99796	0.869004	0.633091	0.940035	0.996779	0.80025	0.502577
hrpr-1	0.924402	0.99796	0.865123	0.611212	0.906617	0.957585	0.771546	0.391424
hars-1	0.838634	0.938458	0.935713	0.873396	0.832629	0.744486	0.998266	0.995433
hsb-1	1.04616	0.99796	1.12857	0.761448	1.10007	0.990084	1.13754	0.744466
hse-5	1.23349	0.900114	1.67931	0.221615	1.12446	0.974064	1.1112	0.870725
hsf-1	1.22605	0.944146	1.00391	0.995371	1.25137	0.607447	0.901108	0.791109
hsp-1	0.880895	0.99796	0.772051	0.421286	0.845309	0.697612	0.709796	0.362887
hsp-3	0.84426	0.941965	1.35018	0.580928	0.915655	0.996899	0.986961	0.982158
hsp-4	0.684752	0.313308	0.694891	0.445911	0.59154	0.215692	0.629867	0.371542
hsp-6	1.04377	0.99796	0.783679	0.32765	0.947552	0.996899	0.677733	0.138269
hsp-12.2	0.940818	0.99796	0.741604	0.335079	0.953605	0.996899	1.11302	0.827869
hsp-12.3	6.8117	1.12388e-05	1.41367	0.907523	3.08128	0.148782	2.72283	0.24007
hsp-12.6	9.38777	0.275294	1.71951	1	4.27833	1	2.56186	1
hsp-16.1	0.817947	0.99796	0.603364	0.327494	0.584745	0.640432	0.579071	0.310826
hsp-16.2	0.940151	0.99796	0.661694	0.0542014	0.999611	0.99822	0.745548	0.686401
hsp-16.11	0.715167	0.99796	0.482947	1.06284e-07	0.719309	0.966427	0.490859	0.120194
hsp-16.41	0.806259	0.99796	0.520631	0.000305204	0.908767	0.996899	0.677431	0.450691
hsp-16.48	0.683052	0.99796	0.546412	0.0113371	0.718323	0.952628	0.630016	0.334668
hsp-16.49	0.683052	0.99796	0.546412	0.0113371	0.718323	0.952628	0.630016	0.334668
hsp-17	1.14085	0.99796	1.21843	0.808178	0.933834	0.996899	1.33092	0.711366
hsp-25	0.992954	0.99796	1.10147	0.816376	0.882479	0.937124	1.0878	0.862186
hsp-43	1.11048	0.99796	0.771809	0.681091	1.07919	0.996899	0.976672	0.974424
hsp-60	0.817209	0.80746	0.706191	0.115391	0.780818	0.441716	0.689645	0.19298
hsp-70	0.636556	0.99796	0.388627	0.00107125	0.675557	0.933974	0.49343	0.0111549
hsr-9	1.06465	0.99796	0.789806	0.463059	1.02775	0.996899	0.607893	0.0849566
hst-1	1.0528	0.99796	1.05594	0.922292	1.08623	0.996899	0.922561	0.863256
hst-2	0.982917	0.99796	0.938112	0.949085	1.05024	0.996899	0.9074	0.891895
hst-3.1	1.57226	0.99796	2.1247	0.530967	1.24253	0.996899	1.86421	0.575974
hst-6	0.975577	0.99796	1.052	0.96456	1.07319	0.996899	1.2198	0.756227
htp-1	0.958659	0.99796	0.821139	0.591611	0.926301	0.996439	1.1393	0.724089
htp-2	1.21536	0.973785	0.844008	0.669885	1.17369	0.891443	0.784836	0.56508
htp-3	1.13108	0.99796	1.00454	0.994815	1.08397	0.990084	0.937468	0.876989
hum-1	1.06202	0.99796	1.00831	0.986612	0.922505	0.990084	1.15774	0.747426
hum-2	0.967988	0.99796	0.852809	0.653913	0.905194	0.971768	0.926364	0.835029
hum-4	0.872283	0.99796	1.04596	0.957067	0.905572	0.996899	0.856516	0.774531
hum-5	0.910623	0.99796	1.19068	0.591712	0.942223	0.996899	1.14625	0.716116
hum-6	0.845904	0.99796	1.88218	0.266599	1.00842	0.996899	1.404	0.671031
hum-7	0.744348	0.843821	0.725439	0.536118	0.78499	0.872885	0.876821	0.820665
hum-8	0.860731	0.99796	0.922057	0.880534	0.853008	0.851386	0.874511	0.712967
hus-1	1.34707	0.898088	1.03517	0.969373	1.40669	0.626048	1.01895	0.977934
hyl-1	0.810377	0.82327	0.82234	0.809749	0.672942	0.0357031	1.01109	0.979978
hyl-2	1.0552	0.99796	1.24041	0.42193	1.02804	0.996899	1.08456	0.826599
icd-1	0.983966	0.99796	0.869617	0.684662	0.948787	0.996899	0.847151	0.625491
icln-1	0.865985	0.99796	0.783001	0.373135	0.811641	0.651223	0.681673	0.203844
icp-1	1.21291	0.99796	0.963078	0.965136	1.1714	0.974932	0.784032	0.635939
ida-1	1.12468	0.99796	1.07026	0.867646	1.10773	0.977797	1.15616	0.658925
ifa-1	0.946291	0.99796	0.748189	0.621012	0.880409	0.957025	0.885956	0.826599
ifa-3	1.42157	0.99796	2.59569	0.547304	1.69457	0.984008	2.17678	0.664316
ifa-4	0.815392	0.85065	0.533761	0.234509	0.720425	0.581447	0.516876	0.325065
ifb-1	0.883187	0.99796	1.03414	0.9475	0.893301	0.959427	0.953428	0.903322
ifb-2	0.532045	0.0822062	0.514686	0.114752	0.647679	0.658357	0.525427	0.214484
ifc-1	1.44218	0.301168	1.30866	0.784412	2.02227	0.0149892	1.17525	0.829128
ifc-2	0.565958	0.0717319	0.642135	0.122383	0.600312	0.26939	0.612623	0.189499
ifd-1	0.438056	9.88501e-06	0.466995	0.217929	0.553594	0.250812	0.447247	0.181476
ifd-2	0.6844	0.101454	0.425179	0.0660842	0.653424	0.246312	0.572138	0.0610034
ife-1	1.03825	0.99796	0.987626	0.983955	0.965318	0.996899	1.06563	0.876511
ife-2	0.729155	0.629372	1.13635	0.829226	0.793292	0.714352	1.07681	0.89247
ife-3	1.08415	0.99796	0.828457	0.584041	1.00444	0.996899	0.686804	0.224614
ife-4	1.00465	0.99796	1.32268	0.647231	0.980891	0.996899	1.65208	0.272402
ife-5	1.50969	0.474379	1.08564	0.921495	1.33486	0.810093	1.75434	0.0690893
iff-1	0.967743	0.99796	0.747743	0.124134	0.916785	0.984008	0.678464	0.130549
iff-2	0.902318	0.99796	1.12127	0.825484	1.02149	0.996899	1.14807	0.780749
ifg-1	0.962146	0.99796	0.832776	0.432786	0.906124	0.948265	0.674555	0.094757
ifp-1	0.340096	3.4e-07	0.421792	0.0141299	0.551319	0.324809	0.41618	0.00776421
ify-1	0.992747	0.99796	0.777618	0.601099	0.942441	0.996899	0.527362	0.101803
ikb-1	1.99749	0.15483	2.11743	0.00125262	1.81602	0.112711	2.59217	0.000451296
ile-1	0.910536	0.99796	1.18606	0.6544	0.913698	0.991	0.993548	0.988934
ile-2	0.858405	0.99796	1.26741	0.601321	0.916791	0.996899	1.06421	0.913851
ima-1	1.09085	0.99796	0.747257	0.565981	0.944611	0.996899	0.521807	0.0862518
ima-2	0.921666	0.99796	0.852905	0.771899	0.859326	0.97934	0.59143	0.158477
ima-3	0.995069	0.99796	0.941355	0.882381	0.913314	0.973971	0.816038	0.49521
imb-1	1.05372	0.99796	0.987566	0.980637	1.00187	0.996899	1.00057	0.9978
imb-2	1.10278	0.99796	0.938434	0.88901	1.09424	0.995601	0.751687	0.423226
imb-3	0.83295	0.83608	0.661881	0.0246759	0.823769	0.726499	0.579703	0.02602
xpo-1	1.10459	0.99796	0.971941	0.953542	1.10086	0.984008	0.953689	0.90764
xpo-2	0.986516	0.99796	0.861896	0.681091	1.00164	0.996899	0.810434	0.585956
xpo-3	1.0595	0.99796	0.892465	0.770214	1.03783	0.996899	0.864763	0.693122
ina-1	0.941729	0.99796	1.11271	0.801965	0.926107	0.996899	1.16931	0.669551
inf-1	0.858415	0.930053	0.854571	0.540854	0.815922	0.465315	0.775343	0.377597
ins-1	0.976327	0.99796	1.12652	0.905939	0.911819	0.996899	1.29807	0.689084
ins-3	0.943367	0.99796	1.10298	0.95723	1.00531	0.996899	1.23036	0.854211
ins-4	1.02312	0.99796	1.05631	0.961954	0.750787	0.942602	1.39919	0.598828
ins-5	0.846018	0.99796	1.06353	0.96456	0.623063	0.850106	1.40848	0.604661
ins-6	1.03834	0.99796	0.985208	0.990849	0.959356	0.996899	1.23748	0.756227
ins-7	0.761453	0.99796	1.92553	0.56482	1.76985	0.728816	2.21484	0.252172
ins-9	1.60402	0.99796	2.36346	1	2.16206	1	3.33326	0.425725
ins-11	3.59324	1	1.38936	1	2.88657	1	3.46508	1
ins-12	2.06407	1	1.54336	1	2.0751	1	1.62618	1
ins-14	2.23589	0.99796	1.62549	1	1.3163	1	3.2764	0.375753
ins-16	1.1934	1	4.06312	1	1.48858	1	2.02228	1
ins-17	1.02809	0.99796	0.913964	0.874772	1.08447	0.996899	1.18734	0.695426
ins-18	1.14558	0.99796	0.971794	0.977829	0.882309	0.996899	1.33688	0.606634
ins-22	1.16947	0.99796	1.07341	0.980898	1.12774	0.996899	0.606955	0.791672
ins-24	1.15327	0.99796	1.0341	0.988743	0.525009	0.961083	0.859621	0.943867
ins-26	1.00689	0.99796	0.810968	0.873396	0.864568	0.996899	0.720084	0.735297
ins-27	1.20424	0.99796	2.09832	0.0673879	1.08968	0.996899	2.35423	0.0323099
ins-28	1.16087	0.99796	1.01448	0.991611	0.914158	0.996899	1.16151	0.862611
ins-29	1.04669	0.99796	1.8136	0.789171	1.35417	0.996899	2.10054	0.61237
ins-30	1.3884	0.99796	1.31984	0.862053	0.877954	0.996899	1.14943	0.918202
ins-33	0.594057	0.982657	1.05047	0.983037	0.517174	0.819123	1.38179	0.697527
ins-34	1.00229	0.99796	0.213152	1	0.573052	0.996899	0.26738	0.523805
ins-35	6.89856	0.161232	19.2838	0.000305204	8.00949	0.0478433	14.3083	0.0189171
ins-37	1.17789	0.99796	1.1256	0.837923	1.2098	0.952628	0.464248	0.166403
inx-1	1.0058	0.99796	1.25501	0.584544	1.0987	0.996899	1.29099	0.614791
inx-2	1.51338	0.99796	0.470546	0.727423	0.991233	0.996899	0.495565	0.675029
inx-3	1.39298	0.99796	1.55086	0.786668	1.05685	0.996899	1.63363	0.6878
inx-5	0.828822	0.914356	1.04573	0.936335	0.781434	0.5363	1.10156	0.809725
inx-6	0.919749	0.99796	1.08262	0.941118	1.05457	0.996899	1.28926	0.72153
inx-7	1.59263	0.230354	1.11412	0.846842	1.52903	0.163842	1.0397	0.944685
inx-8	0.990092	0.99796	0.61297	0.0530641	0.798336	0.726048	0.739996	0.476124
inx-9	1.10666	0.99796	0.944635	0.92619	0.844956	0.916054	0.80784	0.682411
inx-10	1.07927	0.99796	0.998749	0.996816	1.10321	0.996439	1.03329	0.954539
inx-11	1.0389	0.99796	0.900766	0.909512	1.17874	0.996439	0.841913	0.798263
inx-12	0.956175	0.99796	1.22291	0.593085	0.901102	0.977126	1.06263	0.89247
inx-13	0.965878	0.99796	1.33336	0.42225	0.872648	0.918146	1.12923	0.773516
inx-14	1.235	0.99796	0.812065	0.699879	1.18146	0.952817	0.570928	0.18786
inx-15	0.602485	0.0501655	0.670249	0.296908	0.66679	0.116988	0.807307	0.646017
inx-16	0.611854	0.0128496	0.714545	0.421661	0.623366	0.0210977	0.845069	0.707829
inx-17	0.629255	0.0611536	0.682124	0.395643	0.644662	0.0472818	0.776701	0.583838
inx-18	0.887616	0.99796	0.848599	0.89547	0.811911	0.983753	0.777026	0.762954
inx-19	0.938129	0.99796	0.891998	0.953161	1.06388	0.996899	1.06336	0.965367
inx-20	1.09535	0.99796	0.8612	0.917125	0.821995	0.996899	1.09919	0.924534
inx-21	1.17087	0.99796	0.745172	0.551007	1.09442	0.996899	0.878222	0.809617
inx-22	1.06896	0.99796	0.665358	0.584042	0.900649	0.996899	0.46893	0.103335
ipp-5	0.70392	0.379197	0.73762	0.548141	0.715486	0.456319	0.808544	0.55154
ire-1	1.11924	0.99796	1.09673	0.839795	1.04216	0.996899	0.974591	0.961649
gon-14	1.03449	0.99796	0.835863	0.731913	1.00302	0.996899	0.630672	0.255278
irk-1	1.54212	0.99796	1.51861	0.611212	1.53669	0.839578	1.97702	0.283528
irk-2	0.838833	0.99796	0.829711	0.8495	0.806745	0.989469	1.07432	0.936082
irk-3	0.932016	0.99796	1.30376	0.772117	0.841776	0.996899	1.38319	0.660445
iars-1	0.979292	0.99796	0.853467	0.549984	0.904348	0.94982	0.840658	0.565583
iars-2	0.998669	0.99796	0.895248	0.773339	0.976569	0.996899	0.81428	0.572426
isp-1	0.929859	0.99796	1.02135	0.970376	0.939872	0.996439	1.05889	0.895723
ist-1	1.37034	0.938458	1.15799	0.786823	1.38083	0.534264	1.15377	0.780715
isw-1	1.17542	0.99796	0.981157	0.976188	1.12687	0.972022	0.849431	0.678744
itr-1	0.869435	0.99167	0.788257	0.533528	0.867219	0.921252	0.733745	0.321365
itx-1	0.798477	0.822441	1.01406	0.977829	0.90435	0.97084	0.972079	0.960427
jac-1	1.15939	0.99796	1.53491	0.456442	1.13631	0.983573	1.572	0.32467
jip-1	1.11394	0.99796	1.17728	0.799998	1.15411	0.993254	1.29968	0.606634
jkk-1	0.778858	0.99796	1.24814	0.885694	0.744778	0.996899	1.22851	0.85076
jnk-1	0.970801	0.99796	0.88322	0.878996	0.817693	0.982295	1.3041	0.619923
jph-1	0.926915	0.99796	1.00156	0.996816	0.922575	0.996899	1.06475	0.89958
jtr-1	1.21151	0.99796	1.11186	0.851583	1.24307	0.851386	1.00097	0.996951
kal-1	1.45634	0.843821	2.10489	0.0747389	1.59489	0.719626	2.09111	0.186943
kap-1	1.07863	0.99796	1.33027	0.754242	1.30015	0.974932	1.17981	0.843679
kat-1	0.984175	0.99796	1.02521	0.954993	0.92994	0.990084	0.974316	0.955191
kel-1	1.40372	0.99796	1.4312	0.674213	1.43506	0.891443	1.84267	0.349017
kel-3	1.03402	0.99796	1.07592	0.88901	1.09615	0.994776	1.02436	0.966452
kel-10	0.930437	0.99796	0.84015	0.565981	0.913578	0.984008	0.629487	0.333583
kgb-1	0.995902	0.99796	0.98898	0.986303	0.911992	0.991107	0.980527	0.969269
kgb-2	1.89818	0.275403	2.50548	0.00270997	1.37158	0.876276	3.2273	0.010016
kin-1	0.974457	0.99796	1.03671	0.941118	0.947749	0.996899	1.02814	0.950968
kin-2	0.929806	0.99796	1.04508	0.921665	0.946516	0.996899	0.933172	0.85259
kin-3	0.956723	0.99796	1.01195	0.980927	0.993283	0.996899	1.05436	0.895088
kin-4	1.11951	0.99796	0.856452	0.705803	1.11347	0.990084	0.76448	0.485572
kin-5	0.826343	0.944639	0.741391	0.288065	0.815483	0.870715	0.659973	0.464362
kin-9	1.00122	0.998161	0.603741	0.525624	1.06589	0.996899	0.884771	0.909494
kin-10	1.03062	0.99796	1.0431	0.929371	1.03071	0.996899	0.920031	0.85108
kin-14	0.937326	0.99796	1.08702	0.859537	0.95818	0.996899	1.01484	0.979782
kin-15	0.822123	0.99796	0.450363	0.581135	0.329053	0.850187	1.11176	0.961962
kin-16	0.674833	0.99796	0.596798	0.717801	0.307282	0.667309	0.903355	0.950074
kin-18	0.933351	0.99796	0.734334	0.397776	0.858578	0.956741	0.714837	0.391855
kin-19	1.03952	0.99796	1.04401	0.924948	1.00373	0.996899	0.956795	0.911298
kin-20	0.74867	0.692833	0.76041	0.551007	0.718018	0.522087	0.788227	0.592776
kin-21	0.891436	0.99796	0.819114	0.676902	0.851607	0.969191	0.690239	0.536797
kin-24	1.03537	0.99796	1.05254	0.951857	0.966524	0.996899	1.01043	0.984887
sid-3	0.901485	0.99796	0.825333	0.702646	0.964787	0.996899	0.913677	0.815998
kin-26	0.923191	0.99796	0.836767	0.677194	0.856104	0.955802	0.743292	0.656372
kin-29	0.838447	0.99012	1.10882	0.799542	0.952991	0.996899	1.0692	0.884046
kin-30	0.639378	0.99796	0.712891	0.861974	0.417314	0.851386	0.912381	0.955337
kin-31	0.919985	0.99796	0.890348	0.873396	0.95576	0.996899	0.836059	0.767071
kin-32	0.940757	0.99796	1.03999	0.961929	0.851096	0.974932	1.36633	0.576119
klc-1	1.12239	0.99796	0.740134	0.577976	1.0596	0.996899	0.559647	0.175557
klc-2	0.98104	0.99796	1.3215	0.518024	0.950496	0.996899	1.26162	0.629355
klp-3	0.740894	0.571308	0.774143	0.448015	0.734847	0.723384	0.8925	0.822418
klp-4	0.893824	0.99796	0.983741	0.976188	0.995845	0.996899	1.12776	0.738514
klp-6	1.86709	0.99796	0.665096	1	1.76431	0.978592	1.18444	0.937802
klp-7	0.967996	0.99796	0.918361	0.836786	0.949851	0.996899	0.795058	0.507629
gcc-1	0.926249	0.99796	0.812182	0.734333	1.00086	0.996899	0.855892	0.748523
klp-10	0.986822	0.99796	0.656326	0.576792	0.865783	0.990084	0.423637	0.0334279
klp-11	0.820907	0.99796	0.999366	0.996763	0.818215	0.990084	1.3079	0.697221
klp-12	1.06754	0.99796	1.0692	0.887574	1.11147	0.974932	1.0072	0.986412
klp-13	0.894205	0.99796	1.08757	0.952049	0.940837	0.996899	1.15101	0.884
klp-15	0.842822	0.99796	0.683241	0.630776	0.872187	0.996899	0.3004	0.0187243
klp-16	0.9088	0.99796	0.725767	0.602503	0.90239	0.996899	0.357943	0.00922909
klp-17	0.980978	0.99796	0.973456	0.970608	1.03903	0.996899	0.815112	0.648272
klp-18	1.02389	0.99796	0.809606	0.703966	1.01651	0.996899	0.501008	0.0584005
klp-19	1.00096	0.99796	1.03602	0.959567	0.979209	0.996899	0.812273	0.644175
klp-20	1.12536	0.99796	1.08077	0.924444	1.27759	0.840633	1.05593	0.932138
knl-1	1.2779	0.800462	1.00618	0.992035	1.23361	0.740569	0.856957	0.700401
kpc-1	1.44162	0.44858	1.90882	0.000863	1.481	0.286515	1.84067	0.0606312
kqt-1	1.70162	0.813162	1.48211	0.703107	1.41224	0.897757	2.21239	0.273276
kqt-2	0.805936	0.933336	1.0537	0.94253	1.04871	0.996899	0.864753	0.703265
kqt-3	0.589115	0.234603	0.685879	0.398942	0.681119	0.499984	0.779454	0.595799
kars-1	0.920638	0.99796	0.781676	0.265709	0.895502	0.950877	0.772144	0.392252
ksr-1	1.02631	0.99796	0.995915	0.996287	0.934483	0.996899	1.14988	0.742002
ksr-2	1.12269	0.99796	0.867148	0.777185	1.11023	0.990084	0.71181	0.375368
kup-1	1.1885	0.99796	0.87765	0.777933	1.09199	0.996779	0.599421	0.114884
kvs-1	1.34131	0.99796	1.33081	0.778863	1.4063	0.947985	1.9966	0.338626
lad-2	1.21107	0.99796	0.934178	0.944911	1.25796	0.93966	1.24304	0.69327
laf-1	0.906981	0.99796	0.801233	0.399948	0.860723	0.869315	0.809017	0.510758
lag-1	1.2042	0.99796	0.977628	0.977857	1.20492	0.93966	0.782785	0.614242
lag-2	0.767166	0.99796	1.43186	0.876139	0.719765	0.996899	1.31213	0.868916
lam-1	0.910431	0.99796	1.20619	0.557728	0.945896	0.996899	1.13626	0.702846
lam-3	2.27931	0.00725384	6.31488	0.00138594	2.12565	0.0484427	5.23693	0.00540322
lap-1	0.769345	0.349895	0.78598	0.361649	0.72746	0.0759882	0.72116	0.21635
lap-2	1.01121	0.99796	1.04608	0.90234	0.899473	0.938125	1.00215	0.994673
lat-1	1.12855	0.99796	0.899143	0.801309	1.07547	0.996779	0.774316	0.451835
lat-2	0.798895	0.99796	0.969428	0.974273	0.950818	0.996899	0.894736	0.848561
lbp-1	1.0862	0.99796	1.0507	0.934517	0.911748	0.996899	1.04277	0.931708
lbp-2	1.01456	0.99796	1.1308	0.712794	0.874036	0.921252	1.0481	0.914423
lbp-3	0.882794	0.99796	0.881617	0.74443	0.774576	0.518591	0.942594	0.891242
lbp-4	1.22843	0.953109	1.31675	0.584146	1.06486	0.996899	1.16201	0.77116
lbp-5	0.314781	1.50402e-06	0.418231	0.0040683	0.376858	0.00154504	0.436281	0.0221584
lbp-6	1.22204	0.977228	1.41371	0.355021	0.961765	0.996899	1.23318	0.68561
lbp-7	0.60973	0.157994	0.774478	0.674213	0.669122	0.282662	0.682242	0.485572
lbp-8	4.8621	1	3.2337	1	0.841936	1	4.7541	1
ldb-1	0.767436	0.64918	0.980276	0.977036	0.708678	0.183144	0.966949	0.94774
ldh-1	1.39644	0.714421	1.5278	0.488025	1.3492	0.716153	1.66501	0.291834
lea-1	1.67827	0.147557	1.51876	0.0163292	1.9596	0.000231363	1.59872	0.303062
lec-1	0.930016	0.99796	0.884615	0.681091	0.890133	0.918146	0.747348	0.286203
lec-2	0.934707	0.99796	0.720567	0.456135	0.863775	0.991	0.862808	0.791672
lec-3	0.833246	0.798088	0.581518	0.291658	0.788542	0.601136	0.588736	0.397464
lec-4	1.13425	0.99796	1.60057	0.357816	1.10619	0.996899	1.50698	0.506064
lec-5	1.04077	0.99796	0.850977	0.6544	0.82605	0.708494	1.18899	0.614791
lec-6	0.716569	0.203412	0.874042	0.687683	0.741906	0.252232	0.992973	0.989177
lec-7	1.41095	0.99796	1.24655	0.926233	0.936446	0.996899	2.87708	0.373101
lec-8	0.752517	0.298981	1.06383	0.885391	0.68135	0.26939	1.06256	0.939119
lec-9	0.550895	8.34821e-05	0.743858	0.271952	0.527458	2.99847e-05	0.643405	0.228316
lec-10	0.985894	0.99796	1.25837	0.624443	0.770344	0.905764	1.1205	0.902891
lec-11	0.963548	0.99796	0.928298	0.926591	0.716643	0.740569	1.25241	0.752839
lem-2	1.14232	0.99796	1.05759	0.929047	1.11985	0.965953	1.01718	0.977934
lem-3	0.984614	0.99796	0.953028	0.945972	1.02479	0.996899	1.21492	0.693872
lep-2	0.997893	0.99796	1.07562	0.875143	1.01372	0.996899	1.01697	0.9742
let-2	0.881189	0.99796	0.899655	0.741305	0.9838	0.996899	0.83455	0.554649
let-4	6.95565	4.33935e-05	35.8889	4.83837e-09	5.65772	0.00288653	24.4345	7.19617e-05
let-19	0.943003	0.99796	1.17827	0.662994	0.963534	0.996899	1.06411	0.88813
ect-2	1.05253	0.99796	0.778486	0.557728	1.03535	0.996899	0.659237	0.340391
let-23	0.865802	0.99796	1.0421	0.954128	0.972893	0.996899	0.956467	0.930891
let-49	1.16687	0.99796	1.01501	0.983037	1.124	0.990084	0.867622	0.758178
let-60	0.958903	0.99796	0.883835	0.681091	0.886606	0.910632	0.942776	0.882886
let-70	1.05573	0.99796	1.00296	0.995742	1.07573	0.989469	0.945609	0.883289
myo-1	0.692483	0.419283	0.610043	0.168484	0.733621	0.755254	0.889243	0.806849
let-92	1.02581	0.99796	0.977576	0.958753	0.983607	0.996899	0.962613	0.928693
let-99	0.955781	0.99796	0.69234	0.519824	0.858062	0.990084	0.382849	0.00688792
lpr-1	2.76103	0.278413	13.5124	0.000177975	2.72171	0.272234	9.44417	0.0154539
let-268	1.15374	0.99796	1.41487	0.429845	1.15001	0.985651	1.32485	0.469682
let-363	0.959155	0.99796	0.909801	0.788684	1.00607	0.996899	0.910928	0.79925
let-381	1.06409	0.99796	1.24246	0.886114	0.886284	0.996899	1.47717	0.685506
let-413	0.818581	0.910812	0.934732	0.862834	0.83268	0.773539	0.913222	0.816502
let-418	1.17616	0.928312	1.12519	0.743504	1.20125	0.615989	0.955305	0.915118
let-502	1.16832	0.99796	0.923949	0.876139	1.13169	0.972188	0.848705	0.691831
let-504	1.04515	0.99796	0.799479	0.421286	1.04633	0.996899	0.716914	0.272494
let-526	1.12813	0.99796	1.09522	0.798094	1.16334	0.804434	0.913089	0.798921
let-607	0.814973	0.636004	0.950106	0.889188	0.828923	0.554409	0.825719	0.623671
let-630	0.928674	0.99796	0.86514	0.682304	0.980204	0.996899	0.747628	0.388632
let-653	8.04236	1.18479e-06	60.3073	1.16982e-07	4.8786	0.00472992	34.4033	3.9629e-05
let-711	1.02971	0.99796	0.851329	0.673735	1.04433	0.996899	0.768608	0.460833
let-716	0.830674	0.776233	0.74338	0.17565	0.820027	0.593345	0.709458	0.188286
let-721	0.955682	0.99796	1.08724	0.820767	1.02499	0.996899	1.09626	0.800496
let-754	0.909506	0.99796	1.22718	0.656714	0.881827	0.921252	1.0776	0.878758
let-756	1.03666	0.99796	1.16545	0.766442	0.770482	0.859791	1.17269	0.69362
let-765	0.96197	0.99796	0.902827	0.867478	0.966924	0.996899	0.846908	0.738158
let-767	1.05231	0.99796	1.46817	0.251605	0.930501	0.996899	1.09495	0.887002
let-805	0.7855	0.601575	1.12215	0.795982	0.936567	0.996899	0.865992	0.692978
let-858	1.03106	0.99796	0.820265	0.487785	1.79848	4.41407e-05	0.775503	0.417763
lev-1	0.995921	0.99796	1.25595	0.749126	1.01743	0.996899	1.41644	0.565273
lev-8	1.26318	0.99796	1.25648	0.826892	1.35873	0.93966	1.93073	0.246778
lev-9	0.922113	0.99796	1.16312	0.839626	1.07577	0.996899	1.38237	0.558643
lev-10	0.8842	0.99796	1.11458	0.816507	0.898943	0.983573	0.925172	0.856432
lev-11	0.965848	0.99796	0.940291	0.895768	0.917435	0.990084	1.05924	0.902253
lfe-2	0.84531	0.99796	1.08601	0.862834	0.906756	0.990084	1.03701	0.946124
lgg-1	0.896361	0.99796	0.883739	0.811631	0.909676	0.990084	1.03992	0.943009
lgg-2	1.2121	0.99796	1.17696	0.794717	1.16485	0.982295	1.43519	0.453166
lgg-3	1.26163	0.95721	1.14249	0.793568	1.07902	0.996899	0.949975	0.924613
lgx-1	0.948157	0.99796	0.670572	0.656714	1.18867	0.996779	0.938579	0.945284
lig-1	1.23952	0.99796	0.945977	0.934396	1.13222	0.990322	0.66142	0.318089
lig-4	1.30591	0.830307	1.09723	0.838073	1.22239	0.870715	1.09743	0.843623
lim-4	1.20721	1	2.06307	1	1.68366	1	2.92537	0.513159
lim-6	0.918742	0.99796	0.671901	0.419508	0.86746	0.990084	0.586449	0.282176
lim-7	1.05443	0.99796	0.937502	0.925268	0.968043	0.996899	1.0514	0.922957
lin-1	1.02718	0.99796	1.57924	0.168889	1.14165	0.996439	1.47554	0.468099
lin-2	0.936522	0.99796	1.1768	0.712749	0.981119	0.996899	1.23203	0.640411
lin-3	0.943957	0.99796	0.741296	0.670875	0.876081	0.996899	0.513846	0.213225
lin-5	1.09117	0.99796	1.01264	0.984206	1.17048	0.946927	0.821813	0.643977
lin-7	1.05078	0.99796	1.01341	0.987164	1.01172	0.996899	1.06097	0.937081
lin-8	1.22567	0.99796	1.38824	0.597845	1.51759	0.588307	1.50542	0.451355
lin-9	1.32015	0.829659	1.06463	0.920394	1.22258	0.867355	0.936358	0.900589
lin-10	0.54234	0.00106756	0.540082	0.0530641	0.534979	0.000979934	0.577373	0.142592
lin-11	1.0538	0.99796	1.39793	0.451248	1.11345	0.996439	1.22426	0.660689
lin-12	0.827318	0.99796	1.01647	0.986932	0.805413	0.937622	1.14568	0.806537
lin-13	1.17203	0.99796	1.0602	0.901418	1.23483	0.671571	1.08046	0.85259
lin-14	0.986704	0.99796	1.07712	0.890294	1.00125	0.996899	0.945861	0.903144
lin-17	1.02234	0.99796	1.21248	0.728166	1.25814	0.823653	1.20439	0.657155
lin-18	0.780289	0.97815	1.13079	0.853948	1.09648	0.996899	1.17333	0.757192
lin-22	0.881081	0.99796	1.21043	0.94253	1.42539	0.996899	1.64956	0.745227
lin-23	1.05123	0.99796	0.893661	0.807211	0.983878	0.996899	0.781798	0.519973
lin-24	1.04731	0.99796	0.913656	0.862834	0.848677	0.932747	1.02415	0.974424
lin-25	1.01063	0.99796	1.25113	0.658739	1.00207	0.996899	1.30455	0.587925
lin-26	1.28623	0.607042	1.08658	0.841955	1.23009	0.784473	0.965608	0.939929
lin-28	1.06435	0.99796	0.947174	0.930461	1.01928	0.996899	0.787856	0.578772
lin-29	1.55394	0.603148	2.80258	0.02081	1.7132	0.327851	2.56635	0.07668
lin-31	1.05501	0.99796	1.5027	0.515267	1.00677	0.996899	1.37052	0.594863
lin-33	1.17135	0.99796	1.39367	0.607398	1.1024	0.996899	1.75837	0.188283
lin-35	0.988444	0.99796	0.881282	0.793568	0.997259	0.996899	0.720589	0.468153
lin-36	1.07823	0.99796	0.877343	0.752244	1.05207	0.996899	0.660037	0.199342
lin-37	0.99649	0.99796	0.796238	0.643896	0.979652	0.996899	0.588749	0.167231
lin-39	1.17732	0.99796	1.61763	0.268985	1.09234	0.996899	1.4568	0.390674
lin-40	1.16802	0.997826	1.21907	0.5752	1.23979	0.58359	1.11992	0.809238
lin-41	1.1062	0.99796	0.605434	0.52568	1.05177	0.996899	0.294756	0.0207552
lin-44	1.48264	0.851278	1.43542	0.536643	1.5107	0.589144	1.82035	0.335093
lin-45	1.06067	0.99796	0.840693	0.706557	0.928861	0.996899	0.746161	0.47593
lin-46	0.816564	0.99796	0.492863	0.695324	0.732374	0.996899	0.805996	0.916989
lin-48	1.5068	0.996269	1.04779	0.977857	1.57094	0.81308	1.3268	0.740954
lin-49	1.07054	0.99796	0.949742	0.93435	1.02101	0.996899	0.884045	0.788113
lin-52	1.1861	0.99796	0.806052	0.668337	1.11214	0.996439	0.639252	0.286003
lin-53	1.10987	0.99796	0.943375	0.913712	1.04234	0.996899	0.849253	0.73022
lin-54	1.11729	0.99796	0.704622	0.454043	1.03864	0.996899	0.502055	0.0624556
lin-56	1.05941	0.99796	0.994883	0.995371	1.14192	0.984008	0.95022	0.928972
lin-59	1.06394	0.99796	1.03587	0.935064	0.87664	0.900677	1.06583	0.870603
lin-61	1.12497	0.99796	0.914017	0.859273	1.10432	0.990084	0.915088	0.831156
lip-1	1.24246	0.99796	0.856966	0.764068	1.11095	0.996779	0.643961	0.2516
lir-1	1.14079	0.99796	0.981044	0.977747	1.21284	0.851386	0.867565	0.750851
lir-2	1.06171	0.99796	0.929724	0.917125	1.07357	0.996899	0.871714	0.802007
lir-3	1.03938	0.99796	1.24597	0.880847	1.06354	0.996899	1.61377	0.640515
lis-1	1.0051	0.99796	1.00968	0.983037	1.01304	0.996899	1.00426	0.990592
lit-1	1.13301	0.99796	1.2245	0.744452	1.19748	0.968352	1.14671	0.806659
lmn-1	0.988843	0.99796	0.837126	0.570794	0.958463	0.996899	0.837502	0.599907
lmp-1	1.28297	0.97815	1.5243	0.234509	1.26891	0.734327	1.45415	0.456443
lon-1	0.815629	0.99796	1.22181	0.719549	0.71983	0.652805	1.02033	0.978243
lon-2	0.77465	0.974386	0.923567	0.923237	0.898571	0.996899	0.83585	0.722784
lon-3	2.93184	0.850186	6.09739	0.000732595	3.69073	0.533129	5.12058	0.0444867
lpd-2	1.00658	0.99796	0.714647	0.159441	0.947776	0.996899	0.553733	0.0459855
lpd-3	0.910266	0.99796	1.00627	0.989265	1.00584	0.996899	0.939709	0.86913
lpd-5	0.929419	0.99796	0.967192	0.943452	0.881548	0.884051	1.02662	0.956671
lpd-6	0.78106	0.451023	0.71658	0.091073	0.825421	0.747067	0.785443	0.418832
lpd-7	0.974715	0.99796	0.789576	0.304505	1.00376	0.996899	0.774973	0.409108
lpd-8	0.938516	0.99796	0.799905	0.600012	0.9541	0.996899	0.8462	0.702181
lpd-9	1.018	0.99796	1.04449	0.924849	0.970729	0.996899	0.99508	0.990534
lpl-1	1.00504	0.99796	1.05765	0.912358	1.04948	0.996899	1.12166	0.77116
lrg-1	1.1326	0.99796	0.677638	0.265719	1.10156	0.996899	0.566951	0.103335
lrk-1	0.799395	0.952708	1.03759	0.956771	0.83856	0.916514	0.996927	0.994673
lrp-1	1.47227	0.995581	2.43144	0.0598929	1.57449	0.734327	2.19614	0.219378
lrp-2	0.880335	0.99796	1.15485	0.870773	0.832881	0.983573	1.10762	0.887259
lars-1	0.857604	0.99796	0.770517	0.492961	0.838683	0.882103	0.728871	0.403935
lars-2	0.899821	0.99796	0.804012	0.570794	0.864602	0.948253	0.738104	0.404414
lrx-1	0.874096	0.99796	0.456498	0.399922	0.889945	0.996899	0.742436	0.689084
lsm-1	1.08029	0.99796	0.74853	0.610805	1.96834	0.0303056	0.566745	0.179069
lsm-3	0.964744	0.99796	0.882619	0.753912	0.938299	0.996899	0.930385	0.878093
lsm-4	1.05836	0.99796	0.860409	0.700278	0.970915	0.996899	0.772985	0.480776
lsm-5	1.09436	0.99796	0.870086	0.738069	1.07614	0.996899	0.980941	0.971657
lsm-6	0.95037	0.99796	0.784818	0.580928	0.956178	0.996899	0.620537	0.270608
lsm-7	1.09808	0.99796	0.899381	0.812924	1.00779	0.996899	0.855292	0.696978
lsm-8	0.953811	0.99796	0.822481	0.526973	0.848804	0.844785	0.74993	0.375212
lst-1	1.32173	0.860126	1.17743	0.774547	1.17612	0.957585	1.09963	0.855024
lst-2	0.831558	0.99796	0.986697	0.983037	0.844604	0.891443	1.01554	0.975266
ccar-1	1.06927	0.99796	0.927137	0.859273	1.0802	0.993254	0.829622	0.60612
lst-4	1.29544	0.779099	1.17576	0.69439	1.26212	0.635212	1.17971	0.689084
lsy-2	1.40147	0.423454	1.06461	0.895646	1.56348	0.0293708	1.05307	0.913527
ltd-1	1.2856	0.99796	1.04708	0.970608	1.21958	0.989469	1.26608	0.727749
lys-1	0.510943	0.0810846	0.875809	0.829377	0.565495	0.057667	0.816605	0.68868
lys-2	0.914409	0.99796	1.37438	0.56073	0.627317	0.57006	1.59142	0.409026
lys-3	1.14588	0.99796	0.954163	0.965398	0.918715	0.996899	2.23196	0.257377
lys-4	7.38887	1.15e-14	5.92164	5.68932e-11	7.10581	1.08327e-16	6.87678	9.73481e-09
lys-5	16.2106	1.79e-11	6.75613	0.000863	14.0844	1.43825e-07	8.51455	0.000122221
lys-6	8.62681	2.95e-12	3.98618	0.000625621	4.70239	6.73478e-07	6.47269	5.32059e-09
lys-7	0.656999	0.123056	1.54673	0.0140724	1.39493	0.518987	1.62938	0.0378986
lys-8	0.801153	0.981421	1.02122	0.970376	0.762953	0.263561	1.11648	0.757177
lys-10	3.89676	0.646183	4.42591	0.281514	65.562	3.2239e-30	6.75554	0.0380526
mab-3	4.55339	0.0135973	16.4605	2.99729e-08	4.44515	0.0724783	15.1065	0.00256756
mab-5	1.13003	0.99796	1.63691	0.494471	1.23875	0.991002	1.64968	0.370594
mab-7	1.15935	0.99796	0.640294	0.763814	1.09078	0.996899	0.915615	0.944685
mab-9	1.05854	0.99796	1.38977	0.807824	1.13837	0.996899	1.61985	0.579497
mab-10	2.5309	0.0189951	6.47642	4.64409e-06	3.31961	0.00635364	4.71651	0.0160617
mab-20	1.3121	0.99796	2.02075	0.159338	1.69185	0.459226	2.1962	0.150477
mab-21	1.34625	0.99796	2.61309	0.232462	1.29152	0.990084	2.20517	0.174501
mac-1	0.947214	0.99796	0.792837	0.327494	1.00604	0.996899	0.581861	0.025582
mag-1	1.01846	0.99796	0.99921	0.997217	0.985427	0.996899	0.967493	0.945294
mai-1	1.33543	0.99796	1.65308	0.297928	1.24391	0.961721	1.78416	0.266647
map-1	1.01861	0.99796	1.00775	0.991642	1.08761	0.991	0.923403	0.84717
map-2	0.943643	0.99796	0.885331	0.677912	0.978533	0.996899	0.890524	0.732664
mat-1	1.01428	0.99796	0.877809	0.735466	1.0006	0.997396	0.763597	0.439337
mat-2	1.15857	0.99796	0.921976	0.823191	1.62158	0.00204354	0.784224	0.454426
mat-3	1.11413	0.99796	0.984925	0.978071	1.1721	0.857842	0.815666	0.573896
mau-2	0.975503	0.99796	0.712696	0.408786	0.89926	0.989741	0.615651	0.119661
mau-8	1.2401	0.99796	1.01635	0.982695	1.16893	0.968643	0.960396	0.945119
max-1	1.12411	0.99796	1.4624	0.453225	1.31619	0.876276	1.52177	0.403109
max-2	0.855291	0.99796	0.715687	0.486061	0.815334	0.740569	0.636845	0.201172
mbf-1	0.849191	0.945828	0.949918	0.893529	0.849247	0.772574	0.851559	0.64698
mbk-1	1.17617	0.99796	1.00252	0.996621	1.41569	0.240662	0.991763	0.986003
mbk-2	0.91766	0.99796	0.777788	0.559037	1.00038	0.9986	0.706876	0.410423
mca-1	1.12974	0.99796	1.06389	0.882467	1.08591	0.99361	1.08033	0.837364
mca-3	0.966103	0.99796	1.04121	0.940688	0.968596	0.996899	0.980929	0.966452
mcm-2	0.99864	0.99796	0.947899	0.934836	0.910171	0.996439	0.772899	0.60612
mcm-3	1.16416	0.99796	1.06449	0.928546	1.09317	0.996899	0.838964	0.781111
mcm-4	1.1923	0.987783	0.991229	0.988394	1.17476	0.876281	0.909433	0.847125
mcm-5	1.1324	0.99796	1.0493	0.947133	1.0051	0.996899	0.891059	0.860893
mcm-6	1.13174	0.99796	1.07412	0.914991	1.04324	0.996899	0.915543	0.899747
mcm-7	1.06969	0.99796	0.845228	0.723393	1.01703	0.996899	0.750912	0.497906
mdf-1	1.12459	0.99796	0.901743	0.819012	1.09499	0.990084	0.791648	0.507973
mdf-2	1.30279	0.841989	1.03282	0.967047	1.34868	0.584643	0.906308	0.843665
mdh-2	0.924	0.99796	1.04783	0.916495	0.83551	0.598234	0.90603	0.798136
mdl-1	1.1833	0.99796	1.1907	0.730989	1.14808	0.978352	1.18933	0.704844
mdt-6	1.08165	0.99796	0.757448	0.544228	1.08622	0.996899	0.558527	0.109686
mec-1	1.32499	0.755622	1.57855	0.0950496	1.35694	0.714484	1.75618	0.0691634
mec-2	0.963877	0.99796	0.999818	0.999247	1.06443	0.996899	1.2067	0.655469
mec-3	0.845754	0.99796	1.07908	0.972428	0.734543	0.994776	1.11634	0.928972
mec-4	1.643	0.995803	2.08285	0.40242	1.77769	0.79673	2.89448	0.0942556
mec-5	1.12844	0.99796	1.26377	0.628081	1.16165	0.956741	1.48611	0.39548
mec-6	1.28387	0.99796	1.50623	0.765655	1.27178	0.996899	2.11628	0.422648
mec-7	1.06091	0.99796	1.34322	0.284033	1.04721	0.996899	1.5924	0.160336
mec-8	1.22299	0.968086	1.50014	0.333148	1.22794	0.817676	1.44273	0.466493
mec-9	1.02145	0.99796	1.01528	0.987545	0.952099	0.996899	1.44448	0.469851
mec-10	1.25411	0.99796	1.65067	0.450673	1.17681	0.996899	2.00983	0.271827
mec-12	0.966124	0.99796	1.27015	0.52568	0.973949	0.996899	1.38667	0.436664
mec-14	1.407	0.99796	1.82857	0.770048	1.74743	0.977536	1.94049	0.657155
mec-15	1.15936	0.99796	0.771325	0.604617	1.11953	0.996439	0.626143	0.257636
mec-17	0.886409	0.99796	0.91689	0.910637	0.825327	0.951305	1.22059	0.6878
mec-18	1.3808	0.99796	1.51063	0.494167	1.31195	0.894758	1.85892	0.165675
mef-2	1.09392	0.99796	1.4521	0.235185	1.08689	0.996779	1.39937	0.403112
mei-1	1.10353	0.99796	0.934727	0.928515	1.11056	0.996899	0.672169	0.382909
mei-2	1.06271	0.99796	0.611006	0.559037	0.993664	0.996899	0.355969	0.0304994
mek-1	1.44453	0.162308	1.00904	0.988425	1.51632	0.158694	1.05866	0.909678
mek-2	0.997871	0.99796	1.00106	0.997106	0.974016	0.996899	1.0609	0.904506
mel-11	1.14538	0.99796	0.966391	0.956261	1.12246	0.978474	0.874164	0.752839
mel-26	1.03308	0.99796	0.82116	0.771899	0.985937	0.996899	0.699842	0.465172
mel-28	1.13943	0.99796	0.89734	0.819639	1.17263	0.906793	0.776603	0.510758
mel-32	2.5082	3.35497e-05	2.45359	0.00265271	2.242	4.96053e-05	2.28559	0.0235111
memi-1	0.728717	0.988705	0.52581	0.00661563	0.674682	0.592682	0.406297	0.00256693
mep-1	1.03362	0.99796	0.880632	0.734492	1.02128	0.996899	0.788332	0.497212
mes-1	1.49008	0.99796	0.503143	0.591751	0.856108	0.996899	0.352005	0.296609
mes-2	1.18011	0.99796	0.856011	0.765195	1.14826	0.976893	0.790334	0.598828
mes-3	1.10101	0.99796	0.983736	0.978142	1.10686	0.989469	0.867679	0.72641
mes-4	1.13993	0.99796	0.800813	0.554782	1.10065	0.996439	0.797219	0.555888
mes-6	1.14564	0.99796	1.11883	0.846842	1.1278	0.990084	0.894878	0.867542
mev-1	1.04749	0.99796	1.09173	0.837923	1.00295	0.996899	1.08786	0.848791
mex-1	1.06982	0.99796	0.570459	0.602162	0.939369	0.996899	0.176869	0.00347391
mex-3	1.05737	0.99796	0.590145	0.514951	0.968002	0.996899	0.283925	0.00711395
mex-5	1.07499	0.99796	0.610246	0.533587	0.955131	0.996899	0.287666	0.0161011
mex-6	1.06806	0.99796	0.539538	0.500817	0.908457	0.996899	0.191724	0.00229883
mgl-1	1.02614	0.99796	0.882378	0.928546	1.04274	0.996899	1.16182	0.876191
mgl-2	1.34714	0.99796	2.78024	0.129089	1.16769	0.996899	2.93437	0.246258
mif-1	1.13742	0.99796	1.29872	0.477311	1.0717	0.996899	1.07669	0.877034
mif-2	1.01253	0.99796	1.19192	0.733755	0.981563	0.996899	1.54464	0.243956
mif-3	1.01342	0.99796	1.1901	0.816376	1.18009	0.957585	1.14205	0.832817
mif-4	1.74637	0.99796	3.01989	0.478904	1.27147	0.996899	3.01919	0.421793
mig-1	0.654205	0.883485	1.18842	0.685958	0.893432	0.996899	1.09291	0.84717
mig-2	1.13628	0.99796	1.18095	0.71511	0.982034	0.996899	1.23498	0.666076
mig-5	0.991202	0.99796	0.825886	0.695272	0.956666	0.996899	0.68044	0.391127
mig-6	0.890813	0.99796	1.07503	0.857998	0.930585	0.990084	1.01702	0.966892
mig-10	1.08356	0.99796	1.19331	0.690786	1.0823	0.996899	1.34296	0.435543
mig-13	0.88582	0.99796	1.02976	0.975241	1.09653	0.996899	1.05535	0.932032
mig-14	0.755551	0.99796	0.974108	0.972692	0.851315	0.973782	0.919845	0.878758
mig-15	1.24698	0.99796	1.74882	0.145114	1.27249	0.870976	1.72075	0.23043
mig-17	1.22218	0.99796	1.45683	0.50516	1.21414	0.978502	2.1921	0.0560361
mig-18	1.43813	0.977228	1.76132	0.258184	1.47683	0.723714	2.37951	0.0323639
mig-21	1.14745	1	1.22076	1	1.02744	1	1.76571	0.787383
mig-22	1.07211	0.99796	0.990593	0.991183	0.963037	0.996899	0.817195	0.686857
mig-23	0.83056	0.99796	1.15663	0.774547	0.900966	0.994776	1.06307	0.917917
cogc-1	1.17363	0.995581	1.27341	0.559037	1.17149	0.872885	1.22271	0.695165
mix-1	1.22737	0.968495	1.00673	0.991605	1.16568	0.918146	0.918624	0.862604
mkk-4	0.756963	0.99796	0.920635	0.95449	0.658887	0.870715	0.992829	0.993713
mlc-1	0.939161	0.99796	1.16506	0.713699	0.960123	0.996899	0.970207	0.956056
mlc-2	0.976745	0.99796	0.974237	0.968889	0.919865	0.990084	1.02513	0.966319
mlc-3	0.995548	0.99796	1.06706	0.893938	0.985578	0.996899	1.06644	0.896821
mlc-4	1.05771	0.99796	0.913882	0.81948	1.00823	0.996899	0.818465	0.55228
mlh-1	1.1679	0.99796	0.778263	0.506007	1.22224	0.882103	0.612774	0.134965
mlk-1	0.981982	0.99796	1.2151	0.602162	0.873406	0.938443	1.26625	0.61799
mlp-1	0.908559	0.99796	0.645405	0.181951	0.800827	0.786524	0.712033	0.373646
mls-1	1.17277	0.99796	1.7231	0.662836	1.59312	0.959427	1.41648	0.766989
mls-2	1.27291	0.99796	0.873846	1	0.932857	1	1.47572	0.813798
mml-1	1.06076	0.99796	1.40543	0.400061	1.0761	0.996899	1.12211	0.826599
mnm-2	0.727023	0.99796	1.45074	0.813625	0.813683	0.996899	1.56202	0.627699
moc-1	1.10772	0.99796	1.5386	0.341155	1.07488	0.996899	1.67897	0.263996
moc-2	0.950298	0.99796	1.31243	0.757558	1.17128	0.996899	1.65734	0.409108
mod-1	1.19502	0.99796	1.15071	0.921545	0.880776	0.996899	1.26866	0.804147
mod-5	1.41283	0.99796	2.37247	0.201148	1.03665	0.996899	2.51625	0.233585
moe-3	0.962496	0.99796	0.922675	0.954993	1.07425	0.996899	1.03996	0.967132
mog-1	1.10376	0.99796	0.897195	0.776059	1.05828	0.996899	0.749178	0.418832
mog-2	0.89035	0.99796	0.82716	0.601321	0.881113	0.951004	0.78968	0.486538
mog-3	1.19562	0.973785	0.810586	0.521925	1.17063	0.878916	0.659468	0.165731
mog-4	1.00508	0.99796	0.891607	0.717801	1.02496	0.996899	0.795195	0.461071
mog-5	1.08915	0.99796	0.799035	0.438669	1.10977	0.983573	0.702103	0.239801
mom-1	1.55017	0.99796	1.27639	0.879303	1.74397	0.849276	2.27878	0.276395
mom-2	1.07227	0.99796	0.751882	0.658739	0.965835	0.996899	0.508676	0.15812
mom-4	1.03097	0.99796	0.892713	0.804399	0.976914	0.996899	0.79684	0.55821
mom-5	1.063	0.99796	0.888097	0.793927	0.986553	0.996899	0.840172	0.664974
dapk-1	0.89293	0.99796	0.946569	0.91006	0.866893	0.878594	0.943085	0.893329
mpk-1	1.05369	0.99796	0.803168	0.611212	0.978314	0.996899	0.79343	0.517428
mpk-2	1.17655	0.99796	1.419	0.571723	1.39884	0.851386	1.2786	0.670469
mps-1	1.23793	0.99796	0.965375	0.986612	1.0587	0.996899	1.14127	0.924289
mpz-1	0.898696	0.99796	0.914929	0.818509	0.890629	0.968183	0.961157	0.926003
mre-11	1.40668	0.725623	0.845456	0.764744	1.26092	0.876957	0.687524	0.388632
mrg-1	0.994586	0.99796	0.814279	0.542546	0.944271	0.996899	0.782748	0.489416
mrp-1	0.870346	0.99796	1.10475	0.83064	0.933674	0.995467	1.02726	0.9598
mrp-2	1.25205	0.99796	2.59442	3.77568e-07	1.22558	0.851386	2.71788	0.00201259
mrp-3	0.715594	0.197657	0.797533	0.423872	0.9228	0.996899	0.87011	0.736466
mrp-4	1.14334	0.99796	1.04832	0.972692	1.00948	0.996899	0.879856	0.901934
mrp-5	0.797065	0.70686	0.959181	0.946437	0.881629	0.974932	1.00818	0.984887
mrp-6	1.13511	0.99796	0.954273	0.965459	1.25052	0.94982	1.00232	0.995264
mrp-7	0.867389	0.99796	0.855894	0.712426	0.901867	0.977797	0.927442	0.841813
mrp-8	0.92547	0.99796	0.785024	0.629484	0.933308	0.996899	1.05732	0.924044
mars-1	0.90474	0.99796	0.838994	0.513263	0.868176	0.859791	0.777289	0.398374
mrt-2	1.1727	0.99796	1.09885	0.869728	1.25055	0.841976	1.06963	0.899747
msh-2	1.22352	0.933336	0.96872	0.953915	1.1344	0.959479	0.778441	0.52406
msh-4	1.029	0.99796	1.19928	0.940288	1.10951	0.996899	0.796531	0.89474
msh-5	1.17342	0.99796	0.886661	0.827886	1.1514	0.974932	0.86464	0.757268
msh-6	1.39013	0.554331	0.904476	0.843703	1.25977	0.739411	0.796321	0.584121
msi-1	1.08524	0.99796	1.1551	0.603044	0.996438	0.996899	1.12871	0.720023
msp-3	0.767379	0.697595	0.657815	0.395431	0.754258	0.276711	0.646686	0.517428
msp-10	0.816431	0.99796	0.637785	0.513263	0.78126	0.620621	0.586237	0.549657
msp-19	0.845747	0.99796	0.747267	0.603256	0.899295	0.983573	0.578032	0.439195
msp-31	0.783389	0.836108	0.7576	0.617235	0.76885	0.27602	0.664265	0.543236
msp-32	1.70251	1	1.18294	1	0.922711	1	2.4746	1
msp-33	0.749673	0.808993	0.638634	0.320004	0.760818	0.252162	0.531537	0.353454
msp-36	0.818355	0.995581	0.660281	0.371112	0.844736	0.803652	0.582474	0.417763
msp-38	0.911359	0.99796	0.638965	0.421709	0.859202	0.947985	0.492205	0.378868
msp-40	0.840453	0.949219	0.787488	0.596177	0.90535	0.95777	0.702096	0.559497
msp-42	1.05346	0.99796	0.895146	0.913771	0.998391	0.996899	0.951278	0.961649
msp-45	0.817292	0.99796	0.717024	0.490455	0.859679	0.803875	0.664806	0.583838
msp-49	0.691266	0.601575	0.565704	0.296213	0.696784	0.129833	0.518604	0.379705
msp-50	0.689451	0.625443	0.616351	0.32274	0.713561	0.173643	0.604054	0.478728
[truncated: 14,480 more rows]
