# Supplementary material for: Caenorhabditis elegans methionine/S-adenosylmethionine cycle activity is sensed and adjusted by a nuclear hormone receptor
Source: eLife. 2020 Oct 5;9:e60259. doi: 10.7554/eLife.60259 (PMC7561351; doi:10.7554/eLife.60259)
Supplement: Supplementary file 3. — Pacdh-1::GFP on nhr-114 RNAi vs. vector; Pacdh-1::GFP;∆metr-1 on vector vs. Pacdh-1::GFP on vector; Pacdh-1::GFP;∆metr-1 on nhr-114 RNAi vs. Pacdh-1::GFP on vector; Pacdh-1::GFP;∆metr-1 on nhr-114 RNAi vs. Pacdh-1::GFP;∆metr-1 on vector; Pacdh-1::GFP;∆nhr-10;metr-1(ww52) on vector vs. Pacdh-1::GFP on vector; Pacdh-1::GFP;∆nhr-10;metr-1(ww52) on nhr-114 RNAi vs. Pacdh-1::GFP on vector; Pacdh-1::GFP;∆nhr-10;metr-1(ww52) on nhr-114 RNAi vs. Pacdh-1::GFP;∆nhr-10;metr-1(ww52) on vector. Related to Figure 4. [file elife-60259-supp3.xlsx]

## Sheet: Sheet1
Gene	Pacdh-1::GFP nhr-114 RNAi vs. Pacdh-1::GFP vector		Pacdh-1::GFP;∆metr-1 vector vs. Pacdh-1::GFP vector		Pacdh-1::GFP;∆metr-1 nhr-114 RNAi vs. Pacdh-1::GFP vector		Pacdh-1::GFP;∆metr-1 nhr-114 RNAi vs. Pacdh-1::GFP;∆metr-1 vector		Pacdh-1::GFP;∆nhr-10;metr-1(ww52) vector vs. Pacdh-1::GFP vector		Pacdh-1::GFP;∆nhr-10;metr-1(ww52) nhr-114 RNAi vs. Pacdh-1::GFP vector.		Pacdh-1::GFP;∆nhr-10;metr-1(ww52) nhr-114 RNAi vs. Pacdh-1::GFP;∆nhr-10;metr-1(ww52) vector.
	Fold Change	P adjusted	Fold Change	P adjusted	Fold Change	P adjusted	Fold Change	P adjusted	Fold Change	P adjusted	Fold Change	P adjusted	Fold Change	P adjusted
21ur-10017	0.752531	0.99968	0.367343	0.9618	0.712425	0.59385	1.96323	0.472402	0.203674	0.0712801	0.488535	0.243124	2.67663	0.40152
21ur-10126	0.851052	0.99968	0.442053	0.999945	0.701322	0.524239	1.61159	0.567699	0.30653	0.0259993	0.529279	0.15996	1.91312	0.362326
21ur-10296	1.40101	0.99968	1.20894	0.999945	1.76118	0.0957186	1.47307	0.504995	1.32083	0.726157	1.49713	0.283487	1.23428	0.671389
21ur-10762	1.08928	0.99968	1.32797	0.999945	0.978376	0.977278	0.717939	0.752298	1.36561	0.876226	1.24087	0.797515	0.988482	0.99188
21ur-11480	0.876652	0.99968	0.715023	0.999945	0.747344	0.598356	1.03928	0.96597	5.1237	2.28344e-06	1.85368	0.193849	0.393218	0.0139301
21ur-12271	0.741188	0.99968	0.960533	0.999945	0.704496	0.575014	0.716102	0.726723	1.03601	0.992008	0.624705	0.502248	0.640916	0.677983
21ur-12346	0.440931	0.99968	0.703853	0.999945	1.91538	0.194908	2.68825	0.179254	0.372665	0.332191	1.41126	0.631086	4.07451	0.0698668
21ur-12830	1.28539	0.99968	1.58725	0.999945	0.677111	0.434102	0.426434	0.16169	1.00667	0.997619	0.445737	0.114626	0.474878	0.247116
21ur-13137	0.881383	0.99968	0.681314	0.999945	1.43519	0.596642	2.09886	0.357652	1.23866	0.942287	1.23864	0.819146	1.0932	0.937805
21ur-13227	0.840227	0.99968	0.659159	0.999945	0.651861	0.491612	1.00117	0.999469	0.955726	0.988094	0.732781	0.650894	0.831968	0.856225
21ur-13321	0.969826	0.99968	0.609144	0.999945	0.0678307	2.18473e-10	0.111135	4.19125e-05	0.557357	0.251253	0.108777	2.2645e-08	0.21106	3.64303e-05
21ur-13808	0.71462	0.99968	1.09508	0.999945	0.116127	0.000389444	0.102826	0.00857092	0.49383	0.533368	0.160041	0.0141451	0.345241	0.386473
21ur-13952	1.17623	0.99968	0.795218	0.999945	0.690846	0.514533	0.869782	0.87492	0.741451	0.87203	0.753921	0.670987	1.10236	0.925413
21ur-15261	1.22007	0.99968	1.29236	0.999945	1.59882	0.243774	1.24804	0.737903	2.08324	0.186082	2.05463	0.0618924	1.07698	0.918566
21ur-2137	0.439397	0.530795	1.45034	0.999945	4.4211	0.000112885	2.97986	0.0956824	0.826933	0.891852	3.12025	0.00959679	4.11208	0.00010202
21ur-2563	0.946678	0.99968	1.14248	0.999945	0.423398	0.17595	0.366664	0.198942	0.806463	0.936581	0.403662	0.211583	0.543061	0.544607
21ur-3118	0.812806	0.99968	0.989585	0.999945	0.713781	0.521399	0.728215	0.676426	1.1888	0.931146	0.868286	0.825298	0.793426	0.777122
21ur-3139	0.915464	0.99968	1.31262	0.999945	1.97012	0.095498	1.49317	0.515613	0.856701	0.918199	1.41863	0.509388	1.79142	0.274831
21ur-3545	0.871751	0.99968	0.893483	0.999945	0.780372	0.528391	0.877721	0.842974	1.12266	0.936346	0.852413	0.725664	0.826439	0.730117
21ur-372	0.722092	0.99968	0.37498	0.999945	0.705874	0.581146	1.90533	0.492697	0.20773	0.0792972	0.451593	0.19882	2.4295	0.475909
21ur-4739	0.345408	0.455514	1.10148	0.999945	0.631884	0.352221	0.545147	0.593112	2.00055	0.882165	0.359471	0.0536766	0.200305	0.353158
21ur-4930	1.02153	0.99968	0.398642	0.999945	0.636854	0.538863	1.61762	0.676255	0.53186	0.726157	0.331343	0.182488	0.625238	0.769086
21ur-4945	0.801477	0.99968	0.645326	0.999945	0.482849	0.219081	0.757612	0.783258	0.176943	0.0795286	0.493067	0.316046	3.15948	0.360225
21ur-6258	1.22273	0.99968	1.02419	0.999945	1.88826	0.23846	1.81842	0.352969	0.896211	0.969155	0.860576	0.858982	1.04231	0.967952
21ur-7970	1.06722	0.99968	1.59572	0.999945	2.37318	0.0472813	1.48753	0.553965	1.82733	0.483921	2.09397	0.11687	1.2494	0.751492
21ur-8353	0.530904	0.99968	0.883639	0.999945	4.02234	0.00216897	4.41035	0.0512624	0.276167	0.0521926	2.08891	0.218513	8.27914	2.17324e-06
21ur-8410	0.889104	0.99968	0.883009	0.999945	0.909361	0.890726	1.03281	0.971704	0.752654	0.890404	0.832927	0.807494	1.20115	0.853508
21ur-935	0.975606	0.99968	1.0532	0.999945	0.926682	0.907308	0.888488	0.884356	0.725925	0.837822	0.83311	0.788577	1.24398	0.793184
2RSSE.6	1.25489	0.99968	0.896354	0.999945	1.22644	0.667913	1.39103	0.646019	1.19648	0.90092	1.23334	0.691555	1.12154	0.874737
4R79.2	1.10804	0.99968	0.73761	0.999945	1.65592	0.396221	2.24473	0.28182	0.743679	0.906583	2.16254	0.191703	3.11644	0.0851654
aagr-1	1.21927	0.99968	0.398758	0.293419	0.600933	0.155274	1.50988	0.463432	0.576989	0.143242	0.40157	0.00429647	0.758751	0.518822
aagr-2	1.40017	0.99968	1.27001	0.999945	1.23952	0.591703	0.977627	0.972953	0.912028	0.944069	0.986483	0.979239	1.17484	0.757281
aagr-3	1.31686	0.99968	1.1429	0.999945	1.29855	0.474815	1.12552	0.846587	1.10065	0.942823	1.07096	0.879458	1.05852	0.916218
aagr-4	1.76586	0.970719	0.655802	0.999945	0.432755	0.0393437	0.683698	0.680448	0.94444	0.976815	0.481035	0.134747	0.553034	0.282701
aak-1	1.24076	0.99968	1.02393	0.999945	1.5063	0.272475	1.47366	0.488516	0.928179	0.959169	1.22126	0.684034	1.431	0.466291
aak-2	1.13083	0.99968	1.24207	0.999945	1.77579	0.0619244	1.44228	0.503317	1.33406	0.601229	1.77274	0.0643913	1.44648	0.294766
aakb-1	1.2673	0.99968	1.01897	0.999945	1.37046	0.374131	1.36282	0.602714	1.30574	0.685271	1.31136	0.491363	1.09301	0.857673
aakb-2	1.57049	0.99968	0.810659	0.999945	0.835251	0.81606	1.0419	0.971704	0.727116	0.895853	0.621139	0.546773	0.90653	0.942067
aakg-1	0.739395	0.99968	1.15883	0.999945	1.68706	0.183938	1.45776	0.525055	1.17676	0.918272	1.30789	0.590012	1.2107	0.766531
aakg-2	1.72053	0.99968	1.05393	0.999945	1.53624	0.277897	1.4901	0.577206	1.22518	0.8534	2.09229	0.0289005	1.86096	0.13749
aakg-4	0.947316	0.99968	1.58177	0.999945	4.50778	0.000522945	2.8346	0.08929	2.44888	0.112551	5.31771	7.02629e-05	2.37424	0.0535951
aakg-5	1.09679	0.99968	1.16453	0.999945	0.605734	0.102501	0.512802	0.238593	0.78936	0.707699	0.861179	0.707367	1.19023	0.700378
aap-1	0.871657	0.99968	1.21293	0.999945	0.741318	0.421866	0.601942	0.41617	0.966244	0.984453	0.951873	0.915416	1.07299	0.897236
aars-1	1.11979	0.99968	1.37288	0.999945	0.694905	0.424488	0.49806	0.305104	1.08426	0.971201	0.517127	0.182166	0.513404	0.291233
aars-2	1.29708	0.99968	1.50426	0.999945	0.952646	0.903181	0.627263	0.397703	1.55264	0.235339	1.22633	0.593794	0.861413	0.755519
aass-1	1.17485	0.99968	1.64763	0.999945	2.59598	0.0126895	1.5446	0.506109	1.24436	0.810544	1.50225	0.32693	1.31327	0.503357
aat-1	1.25857	0.99968	0.873738	0.999945	0.803955	0.577495	0.957428	0.968381	1.97063	0.066561	0.750741	0.488946	0.414341	0.00960698
aat-2	0.966548	0.99968	1.84893	0.999945	1.83313	0.0675405	1.01175	0.988171	1.91975	0.0967108	1.64632	0.185047	0.93515	0.907875
aat-4	1.73332	0.99968	1.55358	0.999945	1.70307	0.196193	1.10126	0.889589	1.45425	0.739793	1.08676	0.914927	0.81845	0.829888
aat-5	0.949618	0.99968	1.15458	0.999945	2.04805	0.0702175	1.78683	0.316265	1.61187	0.507454	2.32863	0.0478677	1.58455	0.401248
aat-6	0.976645	0.99968	1.14961	0.999945	0.932644	0.896752	0.807516	0.760485	0.90806	0.964665	0.928193	0.902136	1.11818	0.889504
aat-9	0.920193	0.99968	1.13114	0.999945	0.4122	0.00901579	0.361568	0.0473924	1.21002	0.834591	0.643707	0.266436	0.579879	0.17802
aatf-1	0.939368	0.99968	0.767026	0.999945	0.431348	0.021063	0.557952	0.327187	0.678564	0.592857	0.328407	0.00393788	0.527181	0.213514
abce-1	0.975761	0.99968	1.08463	0.999945	0.566159	0.102501	0.523986	0.230715	1.17352	0.838856	0.902769	0.81681	0.839136	0.717436
abcf-1	1.06604	0.99968	0.891837	0.999945	0.598677	0.114261	0.665532	0.43406	0.765979	0.645525	0.638375	0.194922	0.906992	0.827787
abcf-2	0.941297	0.99968	1.19468	0.999945	0.863293	0.690678	0.716115	0.562573	1.18059	0.822795	1.33249	0.44538	1.2327	0.647478
abcf-3	0.860089	0.99968	1.06598	0.999945	0.730841	0.360361	0.678708	0.505407	1.10357	0.934657	0.995476	0.992845	0.983985	0.978274
abf-2	1.27964	0.99968	2.8703	0.999945	16.9019	0.0073424	5.98756	0.012505	2.30518	0.327208	9.76074	0.0806272	4.55512	0.0135569
abhd-11.2	0.928835	0.99968	1.03353	0.999945	0.781716	0.510949	0.756716	0.62597	0.981688	0.991593	0.656825	0.308446	0.730178	0.549673
abhd-12	0.830472	0.99968	1.00856	0.999945	0.685454	0.269592	0.674248	0.490273	0.923128	0.95305	0.709743	0.342116	0.83778	0.700378
abhd-14	0.906985	0.99968	0.895113	0.999945	1.62451	0.195835	1.84408	0.257995	1.05603	0.977219	2.45053	0.010758	2.53394	0.0120501
abhd-3.1	0.831515	0.99968	1.39297	0.999945	2.1345	0.0192922	1.53379	0.435385	1.45082	0.522873	1.86028	0.0946733	1.39061	0.508733
abhd-3.2	0.987766	0.99968	0.583895	0.999945	2.32137	0.00326907	3.98351	0.000707382	0.568172	0.1605	1.242	0.604044	2.38528	0.0201918
abhd-5.1	1.3832	0.99968	1.70306	0.999945	2.74515	0.0309645	1.64454	0.524935	2.67707	0.1502	3.4486	0.00665375	1.3983	0.599825
abhd-5.2	1.2931	0.99968	0.900048	0.999945	1.34746	0.528437	1.49405	0.53306	0.904857	0.96142	1.64624	0.271987	1.97635	0.143577
abi-1	0.764381	0.99968	1.39241	0.999945	0.446791	0.0399337	0.314722	0.0562032	0.728608	0.712082	0.65028	0.345724	0.974411	0.969512
abl-1	1.61916	0.99968	1.55544	0.999945	1.48055	0.293155	0.958322	0.949682	1.7928	0.211532	1.77299	0.120313	1.07611	0.898015
abt-1	1.13354	0.99968	0.960564	0.999945	0.123267	0.00323603	0.125122	0.0434412	0.675681	0.84128	0.130868	0.0120866	0.20657	0.178207
abt-2	1.22057	0.99968	1.55464	0.999945	2.72984	0.00706799	1.73269	0.4005	1.44521	0.71601	2.21354	0.0446567	1.66816	0.299932
abt-4	1.10995	0.99968	1.88304	0.999945	2.79094	0.00546411	1.4359	0.66103	1.23422	0.884993	1.89382	0.118828	1.67083	0.341214
abtm-1	1.17567	0.99968	1.08475	0.999945	0.985172	0.973829	0.904558	0.880559	1.01015	0.995867	0.910655	0.820109	0.982128	0.974894
abts-1	1.33561	0.99968	1.67896	0.999945	1.46042	0.288158	0.855257	0.811079	1.24294	0.780145	1.30709	0.505256	1.14375	0.767658
abts-2	1.27056	0.99968	0.914958	0.999945	1.46762	0.519419	1.61213	0.553018	1.15956	0.962747	1.07879	0.937122	1.00315	0.998597
abts-3	1.21005	0.99968	1.28354	0.999945	1.72294	0.129103	1.34621	0.609651	1.47709	0.591797	1.81376	0.124383	1.34005	0.586627
abts-4	1.3726	0.99968	1.63844	0.999945	1.94237	0.0599019	1.19746	0.781754	1.60032	0.304724	1.78035	0.0909734	1.21062	0.668952
abu-1	0.654965	0.99968	0.218775	0.00343174	0.344251	0.0690323	1.57866	0.62311	0.210372	0.142325	0.634414	0.44358	3.27478	0.0816135
abu-10	0.671624	0.99968	0.341928	0.421346	0.584942	0.469137	1.72483	0.610153	0.487957	0.423046	0.783692	0.683183	1.82173	0.50009
abu-11	0.616709	0.99968	0.21651	0.00545688	0.2335	0.0113289	1.08442	0.945821	0.348611	0.0292585	0.352829	0.0356492	1.15992	0.892607
abu-12	2.54752	0.200928	0.0601517	2.97364e-06	0.0557271	5.97718e-17	0.896616	0.91923	1.42103	0.582143	0.696594	0.648295	0.534108	0.42782
abu-13	2.56171	0.0850241	1.55084	0.999945	0.599943	0.456972	0.405642	0.445926	2.45651	0.00754901	0.908957	0.896707	0.402061	0.106042
abu-14	1.05326	0.99968	0.371137	0.999945	0.363569	0.4008	1.0228	0.987774	0.44289	0.00813975	0.657808	0.545152	1.63248	0.534471
abu-15	0.479209	0.642154	0.31984	0.252706	0.266339	0.0188714	0.8183	0.855998	0.433682	0.149754	0.570589	0.291193	1.48358	0.664185
abu-4	0.87056	0.99968	0.449068	0.999945	0.254773	0.134886	0.574182	0.690717	0.286338	0.436693	0.672719	0.693411	2.67202	0.494009
abu-6	0.544564	0.896071	0.276829	0.0216811	0.161977	0.000752492	0.581922	0.569951	0.387074	0.641937	0.392305	0.119193	1.12052	0.958046
abu-7	0.572237	0.99968	0.262164	0.0132926	0.177218	0.0025103	0.675267	0.701338	0.376725	0.67175	0.3835	0.126551	1.12766	0.95834
abu-8	0.566111	0.647176	0.252389	0.00512408	0.352095	0.0353369	1.39197	0.696409	0.31206	0.507058	0.697529	0.496663	2.451	0.548688
abu-9	0.361589	0.449767	0.394003	0.962049	0.158691	0.000151175	0.395236	0.331808	0.438476	0.356265	0.424186	0.104118	1.10854	0.934449
AC3.12	1.16982	0.99968	0.678735	0.999945	0.0664052	0.00230817	0.0953341	0.0666873	0.630832	0.812702	0.0788714	0.00458096	0.134258	0.100754
AC3.5	1.48474	0.99968	1.40442	0.999945	1.71109	0.16065	1.21951	0.756428	1.32819	0.798727	1.21285	0.697284	0.989823	0.989929
AC8.11	2.6306	0.99968	2.73034	0.999945	3.4859	0.0139908	1.29778	0.750006	3.54605	0.0774941	4.05852	0.010106	1.24404	0.786228
AC8.12	1.57205	0.99968	1.55459	0.999945	2.00904	0.195587	1.3125	0.72798	4.04522	0.00550359	2.44189	0.118242	0.66192	0.502919
AC8.4	2.67309	0.99968	2.77504	0.999945	3.58179	0.0117243	1.31156	0.737476	3.64391	0.0684898	4.0809	0.0105951	1.21749	0.810621
AC8.7	1.57205	0.99968	1.55459	0.999945	2.00904	0.195587	1.3125	0.72798	4.04522	0.00550359	2.44189	0.118242	0.66192	0.502919
acaa-2	1.15958	0.99968	1.05256	0.999945	0.894436	0.753791	0.860523	0.806647	1.17365	0.818779	0.893565	0.76789	0.829073	0.639575
acbp-1	0.960618	0.99968	0.725757	0.999945	0.923253	0.8442	1.2833	0.66906	0.717973	0.491778	0.646446	0.226798	0.979268	0.972049
acbp-3	1.52241	0.99968	1.42074	0.999945	0.887367	0.748437	0.650732	0.640138	1.84782	0.0481138	1.03746	0.937122	0.611927	0.173272
acbp-5	0.855759	0.99968	1.01092	0.999945	0.736562	0.410273	0.724434	0.583994	0.775769	0.679576	0.782973	0.525154	1.09925	0.861346
acbp-6	0.628649	0.99968	0.865677	0.999945	1.71833	0.121054	1.93381	0.36948	0.515889	0.23531	2.00833	0.149217	4.24765	0.00194336
acc-4	1.30307	0.99968	1.34367	0.999945	1.74044	0.338503	1.30909	0.742939	1.52419	0.807817	1.40355	0.64919	0.998859	0.999096
acd-1	1.49799	0.99968	0.44341	0.999945	6.20186	1.00999e-05	14.1332	9.93523e-08	1.23764	0.923322	4.94641	0.000402713	4.45934	0.000602639
acd-3	0.956656	0.99968	0.445974	0.999945	0.90978	0.908708	2.06308	0.467885	0.526955	0.735373	0.823756	0.830804	1.72109	0.649894
acdh-1	0.864042	0.99968	51.5578	9.02214e-29	1.07508	0.884142	0.0208364	1.68716e-24	31.5241	3.23508e-25	1.77969	0.304817	0.0618715	2.58263e-08
acdh-10	1.58399	0.99968	1.00507	0.999945	1.25303	0.554542	1.28213	0.756288	1.57497	0.299766	1.32215	0.455133	0.913878	0.859501
acdh-11	1.0419	0.99968	0.953944	0.999945	1.21238	0.656592	1.27526	0.697206	1.06303	0.968729	1.15842	0.7323	1.18351	0.7446
acdh-12	1.3654	0.99968	1.14924	0.999945	0.95312	0.933612	0.829955	0.775809	0.929375	0.967449	0.858448	0.777257	1.00373	0.995108
acdh-13	1.05865	0.99968	1.11092	0.999945	0.576441	0.178741	0.518248	0.257907	1.0363	0.984307	0.557198	0.119913	0.58677	0.149361
acdh-3	1.02438	0.99968	0.96668	0.999945	0.808445	0.569167	0.844281	0.768894	1.24074	0.769291	0.850823	0.707162	0.74797	0.472096
acdh-4	0.938968	0.99968	0.92385	0.999945	0.195943	0.012785	0.210063	0.0759212	0.39208	0.449119	0.409434	0.224904	1.16518	0.921447
acdh-5	0.844622	0.99968	0.518212	0.999945	0.0809574	4.57922e-10	0.155097	0.00234901	0.421027	0.088619	0.082943	2.11219e-08	0.215705	0.0238519
acdh-6	1.88894	0.57195	0.696317	0.999945	0.45653	0.241695	0.683045	0.76009	0.930317	0.965188	0.63888	0.48506	0.745411	0.71397
acdh-7	1.17888	0.99968	1.11772	0.999945	1.03975	0.939597	0.953582	0.957909	1.69029	0.130482	1.34512	0.399239	0.866235	0.746681
acdh-8	0.867239	0.99968	0.478094	0.831651	0.045384	1.97924e-19	0.0935825	4.69403e-06	0.472446	0.0217106	0.06287	1.73046e-18	0.144754	1.08039e-08
acdh-9	1.08531	0.99968	0.907217	0.999945	0.916909	0.848359	1.01802	0.980442	1.01032	0.996172	0.859014	0.755413	0.92572	0.909959
acds-10	0.947639	0.99968	1.31293	0.999945	1.57587	0.293155	1.20962	0.772055	1.50311	0.520206	1.23159	0.713396	0.889371	0.849482
ace-1	1.45115	0.99968	0.930466	0.999945	2.38241	0.11057	2.60221	0.219319	1.25345	0.940372	1.37891	0.725986	1.18979	0.888526
ace-2	0.898825	0.99968	0.746005	0.999945	1.70155	0.227909	2.28587	0.178721	1.24784	0.888769	1.7669	0.217785	1.53967	0.449063
acer-1	1.21974	0.99968	1.56016	0.999945	2.41432	0.00269248	1.555	0.383887	1.49105	0.305706	1.9349	0.0400107	1.41421	0.339492
acin-1	0.964354	0.99968	1.22913	0.999945	0.516576	0.0730758	0.414595	0.105231	0.863383	0.891441	0.725377	0.432417	0.913682	0.872082
acl-1	0.89442	0.99968	1.06793	0.999945	2.04464	0.0130145	1.9068	0.186244	1.47454	0.394448	1.5489	0.228492	1.14206	0.793697
acl-11	0.866618	0.99968	0.890588	0.999945	0.454109	0.040251	0.506038	0.260011	0.720209	0.678885	0.509524	0.156722	0.771191	0.698094
acl-12	1.14243	0.99968	3.11993	0.0628857	9.66568	2.9563e-11	3.08266	0.0373433	2.72406	0.000510033	13.1523	4.95057e-21	5.25989	4.33198e-10
acl-13	0.77999	0.99968	0.501632	0.999945	0.0561858	1.0968e-08	0.110144	0.00422393	0.421395	0.0772273	0.0535468	2.72548e-09	0.134804	0.00389445
acl-14	1.12424	0.99968	1.10266	0.999945	1.55117	0.197928	1.41673	0.534158	1.03141	0.984799	1.56434	0.168636	1.65102	0.121766
acl-2	0.886682	0.99968	1.44854	0.999945	1.94759	0.0562642	1.3458	0.570976	1.02101	0.989684	1.42005	0.404037	1.51783	0.245317
acl-3	0.853343	0.99968	0.860971	0.999945	0.450269	0.00845696	0.517254	0.225304	0.668102	0.377087	0.459326	0.02845	0.748376	0.555218
acl-4	0.870364	0.99968	1.43437	0.999945	2.64462	0.0239464	1.82703	0.320438	1.11368	0.958896	1.96101	0.227894	1.92557	0.19929
acl-5	1.37228	0.99968	1.18171	0.999945	1.60635	0.393637	1.36858	0.691418	1.32894	0.884593	1.27462	0.762243	1.04479	0.970676
acl-6	0.916755	0.99968	1.13977	0.999945	0.589092	0.188903	0.507488	0.315992	0.751411	0.744529	0.604355	0.25295	0.878259	0.831123
acl-7	0.739555	0.99968	1.42938	0.999945	2.76347	0.00439933	1.8993	0.339403	1.02397	0.992636	2.36613	0.0287132	2.51805	0.045079
acl-8	0.938483	0.99968	1.10501	0.999945	1.08027	0.890031	0.963331	0.965283	1.3004	0.833305	0.966685	0.957853	0.811142	0.757978
acl-9	0.829668	0.99968	0.984112	0.999945	0.956506	0.918218	0.955583	0.949682	0.661347	0.366871	0.728346	0.408823	1.19766	0.69997
acly-1	1.28585	0.99968	1.9067	0.952782	3.83858	3.11866e-06	2.01201	0.162424	3.17892	0.000374092	5.06155	2.14052e-07	1.72764	0.244616
acly-2	1.09167	0.99968	2.1046	0.999945	0.876697	0.789579	0.404758	0.22975	1.31147	0.743949	0.937549	0.906814	0.776509	0.652189
acn-1	2.20819	0.235759	1.26604	0.999945	0.511174	0.246188	0.422387	0.435385	2.71035	0.00157874	1.07579	0.923924	0.433145	0.159941
aco-1	1.53818	0.99968	1.94996	0.999945	2.75585	0.00118455	1.40944	0.50572	2.02448	0.0631159	1.88187	0.0953747	1.00955	0.989269
aco-2	1.18495	0.99968	1.31303	0.999945	0.967233	0.939174	0.733387	0.589154	1.14517	0.908057	0.973849	0.956933	0.926933	0.895378
acox-1.1	1.46379	0.99968	1.11495	0.999945	1.33733	0.476185	1.2134	0.771267	1.35527	0.743949	0.993483	0.991603	0.791871	0.716398
acox-1.2	1.85388	0.815819	0.668858	0.999945	0.306699	0.00220591	0.476208	0.433932	1.49064	0.576829	0.340932	0.0154545	0.247675	0.00143307
acox-1.3	1.23267	0.99968	0.680974	0.999945	0.619934	0.270986	0.911105	0.903739	1.08906	0.964216	0.380428	0.0372668	0.38006	0.0651445
acox-1.4	1.42791	0.99968	0.765508	0.999945	0.721022	0.413285	0.93821	0.92713	1.36638	0.653189	0.445076	0.0229575	0.353769	0.00552033
acox-1.5	0.590113	0.99968	1.05672	0.999945	0.579956	0.170331	0.550386	0.292755	0.884839	0.94575	0.849065	0.734353	1.0471	0.951195
acox-1.6	1.35941	0.99968	0.7508	0.999945	0.655751	0.235869	0.882783	0.852322	1.03334	0.985651	0.772632	0.556447	0.818053	0.725495
acox-3	1.04531	0.99968	0.832333	0.999945	2.12319	0.0709649	2.57151	0.10765	1.32356	0.818779	1.76294	0.277344	1.44463	0.557768
acp-1	1.0439	0.99968	1.14782	0.999945	2.03619	0.0651332	1.79116	0.340207	0.93071	0.973577	1.69028	0.324632	1.98842	0.260351
acp-2	1.37692	0.99968	0.869562	0.999945	0.811867	0.723254	0.943931	0.95047	0.750544	0.882165	0.519066	0.345729	0.746119	0.798537
acp-5	0.793155	0.99968	0.656696	0.999945	0.453184	0.0297723	0.696846	0.55419	0.819456	0.853167	0.619369	0.262792	0.825892	0.75131
acp-6	0.838194	0.99968	1.62671	0.999945	5.42416	2.28452e-07	3.29482	0.0171939	1.5414	0.425608	4.70108	0.00408993	3.31164	0.0282719
acp-7	0.350372	0.99968	1.70056	0.999945	4.98019	0.00394977	2.86164	0.167461	0.66942	0.854361	3.85426	0.048302	6.35661	0.000476584
acr-15	1.55802	0.99968	1.17543	0.999945	1.84841	0.173868	1.58271	0.468466	1.41299	0.786055	1.46554	0.523391	1.1262	0.884662
acr-16	1.27386	0.99968	1.12578	0.999945	1.07802	0.873514	0.978944	0.979948	1.12076	0.943121	1.03621	0.948714	1.00518	0.993915
acr-2	0.864178	0.99968	0.517851	0.999945	0.782035	0.670628	1.53341	0.62397	0.699742	0.829754	0.698244	0.582214	1.07804	0.944753
acr-23	1.43453	0.99968	1.17453	0.999945	1.42073	0.61359	1.23411	0.834644	0.842283	0.963164	1.32886	0.735678	1.7207	0.577152
acr-3	1.12379	0.99968	1.07574	0.999945	1.71435	0.267958	1.60952	0.507423	1.16267	0.955809	1.47957	0.532674	1.39024	0.691731
acr-8	1.68371	0.99968	1.34365	0.999945	1.54195	0.517325	1.17626	0.876721	2.06477	0.511172	0.875683	0.895378	0.462099	0.317182
acs-1	1.28939	0.99968	1.57176	0.999945	3.4342	1.63501e-05	2.17901	0.103346	1.27227	0.789286	1.68642	0.370572	1.43718	0.632785
acs-10	0.77898	0.99968	0.959812	0.999945	0.117369	2.61335e-05	0.120121	0.00272674	0.930195	0.971142	0.213171	0.000392646	0.249836	0.00350092
acs-11	0.902339	0.99968	0.926728	0.999945	2.41363	0.0189477	2.59582	0.0707794	1.02949	0.986112	1.90339	0.208633	2.01336	0.170248
acs-12	1.44562	0.99968	0.940836	0.999945	1.6586	0.229884	1.76875	0.359362	1.12217	0.95971	1.47422	0.432564	1.42941	0.591563
acs-13	1.17443	0.99968	1.66311	0.999945	1.7081	0.120994	0.998944	0.999469	1.00724	0.996183	1.81927	0.0454192	1.96813	0.0390642
acs-14	0.715532	0.99968	0.885221	0.999945	1.5754	0.201445	1.7774	0.289247	0.947342	0.978454	1.28136	0.612169	1.4709	0.46579
acs-16	1.06017	0.99968	0.914816	0.999945	1.09641	0.88905	1.22224	0.825656	0.938082	0.984799	0.998083	0.998531	1.15289	0.878852
acs-17	1.20751	0.99968	2.17143	0.764204	5.31483	5.4577e-07	2.42774	0.0818463	1.65563	0.246599	4.17585	3.78228e-06	2.74046	0.000233068
acs-18	1.20021	0.99968	0.951291	0.999945	0.0395005	3.42095e-05	0.0401542	0.00138987	0.535794	0.61892	0.114243	0.00199732	0.231584	0.180202
acs-19	1.01962	0.99968	1.21333	0.999945	2.38551	0.0148885	1.95116	0.244086	1.06104	0.968729	1.63145	0.238029	1.67605	0.228213
acs-2	1.77129	0.814129	3.44598	0.0499287	6.03847	2.67723e-05	1.75003	0.43281	1.71082	0.226487	2.75485	0.00272374	1.74958	0.123474
acs-20	1.76916	0.802771	1.01854	0.999945	0.686955	0.481732	0.702179	0.737609	1.49186	0.347225	1.18285	0.786248	0.866415	0.844644
acs-22	1.52821	0.99968	0.823647	0.999945	1.62131	0.144771	2.01917	0.292154	1.08719	0.949194	1.28951	0.503763	1.28948	0.565296
acs-4	1.19866	0.99968	1.84684	0.999945	1.3862	0.293697	0.742618	0.602686	1.46983	0.380964	1.49661	0.219528	1.10855	0.836477
acs-5	1.24197	0.99968	1.2275	0.999945	1.97802	0.0376265	1.60717	0.389734	1.22279	0.813594	1.47652	0.276824	1.31476	0.528594
acs-6	1.24404	0.99968	1.11126	0.999945	0.28543	0.0525594	0.250586	0.131314	0.771853	0.921027	0.312485	0.112038	0.444536	0.476262
acs-7	1.47111	0.99968	0.428442	0.999945	0.854253	0.750169	2.06427	0.432847	0.907734	0.968729	0.798953	0.6791	0.95142	0.955098
acsd-1	1.48018	0.99968	2.08411	0.999945	2.6554	0.0327747	1.29363	0.722295	2.23789	0.257849	2.86529	0.0323927	1.39569	0.572485
act-1	0.900956	0.99968	0.806479	0.999945	0.973145	0.950804	1.21712	0.750729	0.879753	0.881794	0.774757	0.452981	0.959207	0.933184
act-2	0.785208	0.99968	0.759053	0.999945	0.765479	0.418291	1.00764	0.990574	0.670109	0.276105	0.635734	0.187512	1.03265	0.951578
act-3	1.00197	0.99968	0.932317	0.999945	1.07189	0.853634	1.14771	0.805717	1.00956	0.995867	1.06852	0.867941	1.15217	0.760765
act-4	1.08943	0.99968	0.906837	0.999945	1.28888	0.476432	1.42079	0.48296	0.933758	0.95801	1.04071	0.932017	1.21357	0.626612
act-5	0.894968	0.99968	0.900851	0.999945	1.0591	0.87892	1.18165	0.766389	0.948376	0.968729	0.918547	0.837347	1.05482	0.915804
actl-1	0.812953	0.99968	0.904937	0.999945	1.6248	0.294282	1.82782	0.412227	1.13722	0.957458	1.49053	0.478696	1.42411	0.636834
acy-1	1.10005	0.99968	1.21696	0.999945	2.27778	0.0517776	1.87326	0.316579	1.31297	0.865905	1.99141	0.158726	1.65131	0.407407
acy-3	1.89443	0.723777	1.77452	0.999945	1.93497	0.0543414	1.09996	0.882492	1.81429	0.208392	1.96507	0.067113	1.17842	0.769669
ada-2	0.915872	0.99968	1.18151	0.999945	0.703842	0.328707	0.588826	0.363524	0.970135	0.985145	0.800284	0.590012	0.900528	0.831978
adah-1	1.26628	0.99968	0.903804	0.999945	1.79586	0.0654769	1.9434	0.273578	1.0012	0.998655	1.40954	0.422603	1.53524	0.31062
adal-1	0.8356	0.99968	1.17494	0.999945	0.275544	0.000504153	0.228976	0.0195337	0.525398	0.212989	0.314997	0.00427478	0.654482	0.443575
adbp-1	0.958267	0.99968	1.18815	0.999945	0.654492	0.364843	0.548841	0.346179	0.981807	0.992996	0.855309	0.761172	0.95019	0.937783
add-1	1.39964	0.99968	0.760591	0.999945	1.51066	0.400824	1.98815	0.316265	0.949611	0.985651	1.74179	0.280477	1.99994	0.262453
add-2	0.641335	0.99968	1.52663	0.999945	1.98269	0.0699949	1.29637	0.668527	1.58108	0.546962	1.66588	0.275685	1.1467	0.839044
adk-1	0.929151	0.99968	2.01032	0.795653	1.38089	0.388995	0.68691	0.490488	2.19398	0.00406468	1.35147	0.428231	0.673005	0.240755
adm-2	1.60079	0.99968	1.17023	0.999945	1.60691	0.217003	1.3828	0.599132	1.45092	0.513002	1.74646	0.127202	1.31205	0.572148
adm-4	0.784481	0.99968	1.31465	0.999945	0.996064	0.993923	0.757656	0.686927	1.30535	0.829754	1.24038	0.705835	1.0348	0.966502
adr-1	1.44008	0.99968	1.39867	0.999945	0.845799	0.646023	0.597769	0.36674	1.47427	0.380416	0.928344	0.859336	0.686061	0.30186
adr-2	0.816676	0.99968	1.26075	0.999945	0.501428	0.0618171	0.394001	0.0906505	0.893893	0.943247	0.598128	0.235238	0.731711	0.596428
ads-1	0.861298	0.99968	0.857329	0.999945	1.11639	0.785733	1.29232	0.657029	0.755123	0.648333	1.00256	0.996117	1.44422	0.331566
adsl-1	1.11706	0.99968	0.67855	0.999945	0.50805	0.0631813	0.755306	0.608774	0.766335	0.726406	0.480291	0.0615067	0.684754	0.355171
adss-1	0.870087	0.99968	1.26316	0.999945	1.84549	0.0302855	1.43403	0.572235	0.932318	0.955742	1.54582	0.147396	1.80699	0.0523237
adt-2	1.4767	0.99968	1.68496	0.999945	2.74476	0.00536346	1.63774	0.385238	1.58813	0.420006	2.28511	0.0287944	1.56411	0.256643
adt-3	1.14104	0.99968	1.20289	0.999945	1.47487	0.58297	1.22324	0.845203	0.71221	0.791435	1.59212	0.468679	2.46659	0.165999
aex-1	0.82114	0.99968	0.912824	0.999945	2.28788	0.0609048	2.4699	0.179021	1.24569	0.918199	2.00777	0.169143	1.76553	0.385927
aex-3	1.16622	0.99968	1.03832	0.999945	1.97234	0.14659	1.91366	0.345177	1.70694	0.593594	2.24573	0.0969172	1.43229	0.594896
aex-4	0.897225	0.99968	0.790334	0.999945	1.99356	0.219241	2.50774	0.191731	0.540762	0.695483	1.9508	0.34482	3.93499	0.0481188
aex-5	1.06856	0.99968	1.12921	0.999945	1.1237	0.82355	0.998027	0.998704	1.25727	0.876226	1.32915	0.584439	1.15273	0.846296
aex-6	1.0006	0.99968	1.12803	0.999945	1.4417	0.426535	1.30072	0.670804	1.24822	0.849722	2.06107	0.108852	1.80343	0.141851
afd-1	1.67286	0.99968	1.56354	0.999945	1.32979	0.426277	0.838873	0.794274	1.11843	0.917983	1.32067	0.598497	1.28893	0.686283
aff-1	1.31768	0.99968	1.83071	0.999945	1.26331	0.709796	0.718566	0.765863	3.04538	0.0164393	1.76044	0.374688	0.624117	0.380365
affl-2	1.14472	0.99968	1.3493	0.999945	1.07811	0.887824	0.791561	0.723773	1.23053	0.858279	1.12661	0.823661	0.994865	0.994605
afmd-1	0.498956	0.99968	0.697547	0.999945	1.05239	0.929356	1.49028	0.602348	0.587324	0.658124	0.959578	0.962918	1.7111	0.587905
afmd-2	1.95216	0.99968	1.18899	0.999945	1.71103	0.34711	1.46682	0.658424	3.76697	0.00983673	1.86982	0.293457	0.541818	0.29084
age-1	1.15721	0.99968	1.72184	0.999945	0.741334	0.443842	0.418733	0.226756	1.11303	0.943861	1.02144	0.969095	1.00262	0.997509
agef-1	1.49204	0.99968	1.04264	0.999945	1.17502	0.649981	1.12414	0.845672	1.00191	0.998048	1.17678	0.669466	1.27965	0.55745
agl-1	1.94358	0.99968	1.4705	0.999945	1.16462	0.789579	0.777558	0.743543	1.4877	0.712302	0.749262	0.662077	0.546702	0.328834
agmo-1	1.47702	0.99968	0.739743	0.999945	0.373126	0.10797	0.526725	0.587978	0.908812	0.953032	0.570911	0.3711	0.683518	0.601424
agr-1	0.743039	0.99968	0.830645	0.999945	1.44237	0.441333	1.76943	0.443041	0.761914	0.87985	1.24514	0.711548	1.77284	0.40052
ags-3	1.12413	0.99968	1.28235	0.999945	1.88786	0.116133	1.4875	0.529412	1.3383	0.725381	1.59301	0.258829	1.29222	0.574013
agt-1	0.829947	0.99968	1.20119	0.999945	0.624839	0.164478	0.517058	0.211967	0.98675	0.99433	0.630269	0.218543	0.695987	0.423144
agxt-1	1.06432	0.99968	0.691557	0.999945	0.708293	0.298993	1.04644	0.954242	0.859049	0.871878	0.688669	0.318385	0.87237	0.796303
AH6.3	0.894449	0.99968	0.895681	0.999945	0.129115	0.00104019	0.144634	0.015134	0.792033	0.918913	0.167473	0.0418472	0.22684	0.219587
AH9.3	0.962626	0.99968	0.867197	0.999945	1.13582	0.774329	1.31839	0.654808	0.921547	0.967978	1.41136	0.427211	1.66692	0.272659
AH9.6	1.04576	0.99968	0.936469	0.999945	1.41666	0.439096	1.52178	0.510241	1.01883	0.995184	0.858504	0.812825	0.917807	0.924523
aha-1	1.15612	0.99968	1.11924	0.999945	1.5918	0.349799	1.44425	0.624786	1.36537	0.845854	1.54666	0.468679	1.23642	0.807448
ahcy-1	1.12508	0.99968	2.71199	0.272962	2.05904	0.0133109	0.766272	0.629779	3.03052	4.4643e-06	1.96596	0.0263414	0.705948	0.283142
aho-3	0.953015	0.99968	0.986408	0.999945	0.457072	0.00834623	0.456902	0.161607	0.738591	0.579525	0.412824	0.00352892	0.609337	0.160899
ahsa-1	1.09959	0.99968	0.912009	0.999945	0.61266	0.104343	0.670955	0.43027	0.954369	0.972464	0.771369	0.555497	0.881746	0.826468
ain-1	1.29517	0.99968	1.19549	0.999945	1.8419	0.0426816	1.53692	0.393112	1.30455	0.638225	1.68471	0.0994476	1.4062	0.328328
ain-2	1.31115	0.99968	1.29881	0.999945	1.19095	0.635797	0.904023	0.884356	0.98077	0.989684	1.21824	0.649329	1.3548	0.513598
aip-1	0.967473	0.99968	0.984336	0.999945	1.12023	0.805374	1.12052	0.8776	0.717231	0.594126	1.73264	0.239877	2.64617	0.00888684
aipl-1	0.928338	0.99968	1.06922	0.999945	0.325278	0.00118455	0.298637	0.0389897	0.683237	0.497846	0.401034	0.00877772	0.63887	0.344305
aipr-1	0.816029	0.99968	1.08112	0.999945	1.02332	0.961525	0.944955	0.936046	0.791505	0.81193	0.947895	0.919325	1.30327	0.636117
air-1	0.890503	0.99968	0.996333	0.999945	0.147254	4.03525e-13	0.145462	4.26593e-05	0.642063	0.212989	0.223324	1.85652e-08	0.379402	0.000510694
air-2	0.780294	0.99968	1.06003	0.999945	0.147828	9.91438e-10	0.137225	7.43758e-05	0.537056	0.119047	0.254828	2.55928e-05	0.518972	0.112779
ajm-1	1.49582	0.99968	1.19163	0.999945	1.4095	0.318463	1.17839	0.783384	1.17821	0.837822	1.51588	0.322239	1.40363	0.490482
aka-1	1.20691	0.99968	1.43555	0.999945	0.628279	0.194058	0.42524	0.218266	0.924576	0.959169	0.635468	0.219293	0.747013	0.549343
akap-1	1.05807	0.99968	0.811973	0.999945	0.849536	0.659554	1.04499	0.944414	0.958483	0.978454	0.888483	0.768715	1.01179	0.984732
akir-1	0.902452	0.99968	0.890991	0.999945	0.605211	0.132082	0.673953	0.490273	0.843331	0.805296	0.726979	0.318976	0.939115	0.891647
akt-1	1.26056	0.99968	1.53931	0.999945	0.975994	0.952436	0.628927	0.394341	1.83414	0.0518413	0.991556	0.985884	0.5899	0.114219
akt-2	1.15075	0.99968	1.28893	0.999945	2.2394	0.046945	1.7541	0.388592	1.39646	0.618806	2.4266	0.00350044	1.89357	0.0952273
aldo-1	1.23453	0.99968	1.25602	0.999945	1.36386	0.323579	1.10482	0.88296	1.19063	0.844085	1.56855	0.16576	1.43259	0.424913
aldo-2	0.979462	0.99968	1.32966	0.999945	1.99289	0.053637	1.50577	0.48337	1.12014	0.914435	1.52328	0.318385	1.47761	0.404926
alfa-1	1.09186	0.99968	0.925111	0.999945	0.621534	0.26974	0.661973	0.56829	0.776361	0.738539	0.71343	0.373757	1.00075	0.999055
alg-1	1.46539	0.99968	1.05356	0.999945	1.20702	0.646346	1.16488	0.811493	1.36584	0.687723	1.24662	0.666443	0.99717	0.997572
alg-2	1.51164	0.99968	1.54848	0.999945	1.79081	0.0885808	1.14204	0.847251	1.56294	0.520206	1.53229	0.305899	1.06542	0.929854
alg-3	1.33497	0.99968	0.993076	0.999945	0.0990028	0.000288714	0.0972145	0.00598952	0.496908	0.579704	0.149952	0.00739199	0.357378	0.41926
alg-4	1.16724	0.99968	1.01991	0.999945	0.0978448	3.90165e-06	0.0934624	0.000833299	0.840368	0.914435	0.167517	0.000386838	0.219882	0.0142271
alg-5	1.2213	0.99968	1.72471	0.999945	0.154755	6.85638e-07	0.0858994	0.00121711	0.687896	0.622226	0.263521	0.00191069	0.417715	0.12404
algn-1	1.0615	0.99968	1.30375	0.999945	0.879024	0.777651	0.66406	0.536742	1.02495	0.988865	0.705968	0.394557	0.749444	0.564667
algn-10	0.826545	0.99968	1.00333	0.999945	0.633401	0.315371	0.632355	0.416058	0.852569	0.911837	0.692681	0.48184	0.888462	0.846741
algn-11	0.798928	0.99968	0.920972	0.999945	0.668287	0.291312	0.719744	0.595175	0.722027	0.547687	0.753308	0.432632	1.13581	0.795355
algn-12	1.11834	0.99968	1.14717	0.999945	0.746625	0.437903	0.647076	0.445113	1.06493	0.969155	0.896093	0.818855	0.916295	0.889017
algn-13	0.696864	0.99968	0.906426	0.999945	0.520141	0.10582	0.572313	0.345313	0.779917	0.802344	0.607135	0.263906	0.84909	0.788951
algn-2	0.920869	0.99968	1.18992	0.999945	1.10047	0.827981	0.929197	0.912325	0.971908	0.985651	0.846129	0.73215	0.942086	0.927952
algn-3	1.04809	0.99968	0.992602	0.999945	0.830881	0.698799	0.831676	0.795509	1.08769	0.968729	0.858697	0.781037	0.858316	0.830238
algn-5	0.86114	0.99968	1.05282	0.999945	1.05389	0.895522	1.00678	0.991533	1.08956	0.943247	1.19944	0.640865	1.19984	0.671714
algn-6	0.904501	0.99968	1.02037	0.999945	0.614703	0.212757	0.599892	0.371392	0.890914	0.943121	0.758646	0.542858	0.925266	0.905064
algn-7	0.730672	0.99968	1.04838	0.999945	0.926409	0.900906	0.893075	0.882741	1.04811	0.985145	1.0082	0.991055	1.05085	0.949097
algn-8	1.60368	0.99968	1.82697	0.999945	0.942894	0.918303	0.512238	0.292755	1.19555	0.921728	0.896419	0.860309	0.813695	0.792659
algn-9	1.09609	0.99968	1.11038	0.999945	0.675985	0.269257	0.607129	0.359713	0.91705	0.953028	0.668191	0.276673	0.793253	0.635994
alh-1	1.13081	0.99968	0.898894	0.999945	1.10064	0.787133	1.23159	0.70006	1.23441	0.735687	1.07408	0.874171	0.946397	0.918137
alh-10	1.04089	0.99968	0.904858	0.999945	1.47334	0.379247	1.64436	0.435806	1.05051	0.98131	1.47559	0.463605	1.5264	0.466596
alh-11	1.29331	0.99968	1.33169	0.999945	1.13033	0.800472	0.836776	0.812076	1.2589	0.851319	1.17923	0.752411	1.02089	0.978634
alh-12	0.926386	0.99968	0.705981	0.999945	0.605831	0.127035	0.86686	0.822279	0.976041	0.98702	0.610552	0.112658	0.681466	0.3557
alh-13	2.02248	0.530795	0.620368	0.999945	0.363083	0.0113344	0.60923	0.613991	1.02649	0.986651	0.437932	0.0946403	0.464421	0.123487
alh-3	1.63468	0.99968	1.21265	0.999945	1.38382	0.426535	1.15349	0.825993	1.43459	0.574363	1.10045	0.849987	0.834414	0.702594
alh-4	0.766022	0.99968	1.13727	0.999945	1.755	0.088582	1.51795	0.511396	0.834332	0.818779	1.3418	0.435031	1.75619	0.0649475
alh-5	1.44655	0.99968	1.67082	0.999945	3.53756	0.0049885	2.12233	0.243059	3.68908	0.023121	3.34828	0.0231043	0.990508	0.991334
alh-6	0.839734	0.99968	1.12772	0.999945	0.880086	0.767499	0.777634	0.6707	0.960917	0.982596	0.91816	0.856843	1.04305	0.942066
alh-7	1.04925	0.99968	1.28588	0.999945	1.54886	0.22574	1.20817	0.756749	1.14521	0.933183	1.36477	0.466582	1.2985	0.657554
alh-8	1.20259	0.99968	1.48859	0.999945	1.61772	0.107856	1.08442	0.887785	1.28543	0.649382	1.3747	0.38057	1.16605	0.738735
alh-9	0.948561	0.99968	1.30556	0.999945	1.47077	0.235032	1.11803	0.861182	1.20562	0.799633	1.36877	0.494625	1.23418	0.709925
alkb-1	0.949801	0.99968	0.950571	0.999945	0.768786	0.521321	0.810798	0.724269	0.942228	0.973577	0.698155	0.404511	0.809118	0.703634
alkb-7	0.937377	0.99968	1.00341	0.999945	0.442688	0.0554289	0.4385	0.186833	0.98828	0.996172	0.67724	0.435402	0.7482	0.659926
alkb-8	1.18588	0.99968	1.23161	0.999945	0.79023	0.687994	0.641723	0.525074	1.22031	0.923358	0.766147	0.712685	0.67466	0.653743
allo-1	0.829977	0.99968	1.50489	0.999945	3.76806	3.68691e-06	2.46565	0.104043	0.981085	0.990227	4.78042	2.20202e-08	5.30998	2.51771e-10
alp-1	1.25305	0.99968	1.01992	0.999945	1.04685	0.927612	1.0336	0.960984	1.00946	0.996172	0.865328	0.778462	0.932295	0.893106
alr-1	1.16069	0.99968	1.10271	0.999945	1.69866	0.294282	1.5583	0.553582	1.42691	0.812819	1.86518	0.201502	1.41854	0.64335
alx-1	1.72851	0.792871	1.4972	0.999945	2.5011	0.0020503	1.61642	0.536423	1.36902	0.576829	2.60638	0.00563262	2.07482	0.0599433
aly-1	1.04759	0.99968	0.814108	0.999945	1.28356	0.617716	1.61651	0.550263	1.56754	0.594074	1.88838	0.123461	1.31282	0.655569
aly-2	0.805325	0.99968	0.874254	0.999945	0.245976	4.38261e-06	0.278968	0.00795888	0.746195	0.591797	0.398282	0.00340421	0.582285	0.144344
aly-3	0.933398	0.99968	0.864098	0.999945	0.48444	0.00918936	0.558764	0.235477	0.739637	0.520206	0.469172	0.00618294	0.691166	0.291475
ama-1	1.64311	0.99968	1.9443	0.999945	0.995483	0.990972	0.501139	0.262683	1.59707	0.391654	1.14518	0.791514	0.781175	0.702594
aman-1	1.44459	0.99968	1.29067	0.999945	1.33376	0.599048	1.046	0.958936	1.27134	0.893639	1.55003	0.443001	1.32535	0.712987
aman-2	1.39052	0.99968	1.52855	0.999945	1.29788	0.499077	0.846805	0.785989	1.34483	0.713726	1.5108	0.283762	1.22282	0.694182
aman-3	1.73303	0.99968	1.72973	0.999945	3.16337	0.00140083	1.79379	0.403932	1.33557	0.789444	2.86883	0.00537492	2.34458	0.0479536
ampd-1	0.989832	0.99968	0.975635	0.999945	1.18498	0.697333	1.1954	0.770789	0.910098	0.947453	1.3985	0.454436	1.67209	0.135031
amph-1	0.89176	0.99968	1.01687	0.999945	1.88042	0.0590129	1.85609	0.193305	1.02752	0.985651	1.91379	0.065828	2.03252	0.018197
amt-4	1.9171	0.959015	1.68817	0.999945	1.18299	0.747377	0.707365	0.597837	1.73523	0.447643	0.947959	0.936332	0.59325	0.343961
amx-1	0.945443	0.99968	1.30461	0.999945	1.69586	0.354195	1.31077	0.698078	1.2945	0.897234	1.74363	0.376786	1.46661	0.571007
amx-2	0.796751	0.99968	0.683405	0.999945	1.06922	0.88905	1.55013	0.493228	0.562828	0.25027	1.18081	0.726547	2.29572	0.0545087
anat-1	0.830627	0.99968	0.966569	0.999945	0.553358	0.0955189	0.567513	0.319983	0.769278	0.678789	0.568674	0.109701	0.806809	0.593876
anc-1	1.03276	0.99968	1.35683	0.999945	1.69694	0.102929	1.21624	0.815039	1.1565	0.897258	2.03474	0.093985	1.91959	0.17855
angl-1	0.695175	0.99968	0.69283	0.999945	0.410862	0.148813	0.588415	0.573944	0.49481	0.602973	0.714622	0.646917	1.58203	0.662936
ani-1	1.16092	0.99968	1.95152	0.999945	0.340944	0.000494087	0.169279	0.0034437	0.920285	0.950874	0.47945	0.0208032	0.567397	0.114915
ani-2	1.50269	0.99968	2.25801	0.999945	0.308555	0.000423331	0.13232	0.00175447	0.986369	0.99433	0.318074	0.00035274	0.350607	0.00524808
ani-3	0.934252	0.99968	1.61236	0.999945	0.284796	0.000303433	0.171501	0.00419312	0.626226	0.277201	0.338676	0.000418789	0.588602	0.187426
anmt-1	0.875137	0.99968	0.632917	0.999945	0.658967	0.423828	1.07221	0.949269	0.865356	0.953028	0.859622	0.816496	1.07833	0.934449
anmt-2	1.12842	0.99968	0.886443	0.999945	0.918224	0.843442	1.06012	0.943311	1.05354	0.971142	0.667448	0.283422	0.688766	0.300427
anmt-3	1.13028	0.99968	0.774551	0.999945	1.18285	0.656057	1.54583	0.419858	1.08606	0.954791	0.932548	0.880039	0.936957	0.91029
anp-1	1.03259	0.99968	0.939026	0.999945	0.839572	0.690135	0.870779	0.873332	0.520419	0.144895	0.96177	0.940581	2.03197	0.125818
anr-35	1.0326	0.99968	1.33167	0.999945	1.3007	0.632047	0.972719	0.973377	1.05131	0.985651	1.35848	0.616752	1.40478	0.661364
anr-47	1.21475	0.99968	0.494124	0.999945	0.220026	0.0406652	0.438292	0.519117	0.583639	0.801678	0.371711	0.243052	0.687957	0.813323
ant-1.1	1.02531	0.99968	0.959797	0.999945	1.30696	0.418707	1.3782	0.54837	1.08549	0.943247	1.10931	0.793589	1.11477	0.805599
ant-1.3	0.967504	0.99968	0.567365	0.999945	0.0762392	3.19789e-10	0.135059	0.000145208	0.641375	0.446098	0.141226	8.76676e-07	0.238265	5.53252e-05
ant-1.4	1.21065	0.99968	0.637763	0.999945	0.0644549	2.96355e-14	0.102342	1.13972e-05	0.702667	0.61599	0.110854	2.86002e-09	0.171787	4.81628e-06
aos-1	0.990218	0.99968	1.03056	0.999945	0.435199	0.00933621	0.42287	0.0811257	0.914208	0.931683	0.511608	0.028622	0.61055	0.147381
apa-2	1.46486	0.99968	1.33963	0.999945	1.29331	0.582019	0.976515	0.97564	2.08633	0.197439	1.63567	0.272837	0.852583	0.821908
apb-1	1.71855	0.99968	1.36472	0.999945	1.20425	0.622951	0.874917	0.826614	1.42716	0.51955	1.1863	0.678981	0.904585	0.844144
apb-3	1.35641	0.99968	1.26598	0.999945	0.989124	0.981192	0.768441	0.696762	0.985379	0.994976	0.924268	0.87613	1.01972	0.978243
apc-10	1.08282	0.99968	0.892389	0.999945	0.182222	0.000168081	0.201452	0.0123784	0.758931	0.83209	0.257219	0.00581837	0.36806	0.100635
apc-11	1.0092	0.99968	0.847727	0.999945	0.409725	0.0148735	0.478287	0.233148	0.654388	0.554631	0.436278	0.0514967	0.72604	0.634624
apc-2	0.761397	0.99968	0.939609	0.999945	0.388509	0.0145035	0.407467	0.163813	0.620671	0.509344	0.375317	0.0203833	0.660983	0.544661
apd-3	1.27226	0.99968	1.19677	0.999945	0.772466	0.541898	0.636792	0.48849	1.01114	0.996172	0.758483	0.536146	0.814715	0.745766
ape-1	1.25287	0.99968	1.61933	0.999945	1.25301	0.553549	0.758485	0.696203	1.17269	0.859125	1.32549	0.484795	1.23422	0.639314
apg-1	1.16518	0.99968	0.998391	0.999945	0.889472	0.77024	0.876365	0.849038	0.936846	0.966824	0.874853	0.772703	1.01624	0.980091
aph-1	1.06945	0.99968	1.05288	0.999945	0.835541	0.659724	0.790085	0.69989	0.983511	0.992636	0.835227	0.662204	0.925461	0.894704
aph-2	1.29177	0.99968	1.36808	0.999945	1.02631	0.962411	0.746225	0.619139	1.42816	0.691656	1.01694	0.979367	0.774151	0.625227
apl-1	1.24098	0.99968	1.07221	0.999945	1.4993	0.215999	1.40354	0.512097	1.21753	0.785407	1.53092	0.207441	1.36917	0.367837
apm-1	1.5305	0.99968	1.06203	0.999945	1.35457	0.34398	1.29841	0.671693	1.11302	0.922808	1.81681	0.0466921	1.78132	0.0969905
apm-3	1.0841	0.99968	0.842021	0.999945	0.897979	0.795185	1.09173	0.907682	1.79018	0.122046	1.14212	0.760002	0.695853	0.345225
apn-1	0.723729	0.99968	1.24034	0.999945	0.575347	0.207296	0.456348	0.23902	0.927066	0.972262	0.689806	0.495809	0.814604	0.790191
app-1	1.14503	0.99968	1.00909	0.999945	0.438383	0.00541112	0.429233	0.112502	0.990873	0.995846	0.58574	0.110667	0.645126	0.239927
apr-1	1.01877	0.99968	2.03072	0.999945	0.643265	0.278888	0.310126	0.0554748	1.23781	0.834591	0.932783	0.8977	0.822275	0.705197
aps-1	0.995702	0.99968	0.867567	0.999945	0.859548	0.712226	0.996079	0.995934	0.978027	0.988038	0.946341	0.901605	1.05255	0.918137
aps-2	1.25704	0.99968	1.02621	0.999945	1.1222	0.754062	1.11012	0.876073	1.38965	0.498737	1.24758	0.544815	0.977693	0.964647
aps-3	0.535584	0.99968	0.629972	0.999945	0.54159	0.227393	0.874027	0.875913	0.778295	0.808601	0.6048	0.313024	0.849817	0.810423
aptf-3	0.848384	0.99968	1.44306	0.999945	0.246777	0.000275652	0.165835	0.00968921	0.505202	0.306095	0.360837	0.0193479	0.787835	0.787679
apx-1	0.792735	0.99968	1.60836	0.999945	0.496305	0.0945406	0.301284	0.0656336	0.694493	0.626345	0.624463	0.338944	0.982462	0.979614
apy-1	1.31643	0.99968	1.05525	0.999945	1.82122	0.122635	1.76217	0.305813	1.085	0.959262	1.66816	0.226541	1.68234	0.148861
aqp-1	0.893894	0.99968	0.92372	0.999945	2.02243	0.0179711	2.20398	0.0928843	0.996915	0.997789	1.36544	0.466088	1.48547	0.404926
aqp-10	0.982198	0.99968	0.656108	0.999945	0.942539	0.882985	1.45441	0.514423	0.74294	0.547765	0.718156	0.327332	1.05217	0.915363
aqp-11	0.74019	0.99968	0.668169	0.999945	1.04537	0.916289	1.57104	0.389934	0.795801	0.745457	0.879307	0.768792	1.20348	0.700543
aqp-2	1.05856	0.99968	1.37893	0.999945	1.76707	0.0876549	1.29362	0.658649	1.43917	0.420006	1.88851	0.0630714	1.43376	0.377895
aqp-4	0.797159	0.99968	0.364693	0.177582	0.578172	0.0959152	1.59283	0.365342	0.472966	0.019234	0.586959	0.1253	1.35415	0.45048
aqp-6	1.20681	0.99968	1.00655	0.999945	1.91226	0.278906	1.90618	0.404768	0.763478	0.924291	2.11834	0.221524	3.02224	0.0993403
aqp-7	0.906691	0.99968	1.28932	0.999945	2.91119	8.45397e-05	2.2408	0.0947527	0.987882	0.994028	2.13462	0.0109767	2.35207	0.00497595
aqp-8	0.653397	0.99968	1.947	0.999945	3.82887	0.000845319	1.94785	0.291079	1.0314	0.988094	3.35891	0.00256716	3.55928	0.000111691
aqp-9	0.8618	0.99968	1.10492	0.999945	1.32295	0.575014	1.22513	0.816201	1.02372	0.992996	0.859909	0.837781	0.913086	0.925806
arc-1	1.18691	0.99968	1.69245	0.999945	2.43317	0.00702811	1.44822	0.517713	1.77654	0.290777	2.39976	0.0172699	1.46737	0.430316
arch-1	1.14514	0.99968	1.06742	0.999945	1.09531	0.839564	1.0196	0.977181	0.988144	0.995184	1.22181	0.624552	1.34472	0.466287
ard-1	0.704041	0.99968	0.93175	0.999945	0.864507	0.707082	0.939495	0.919161	1.04641	0.974695	0.792293	0.586777	0.825579	0.676661
arf-1.1	0.793512	0.99968	6.85438	0.0291516	42.2579	3.2805e-27	5.93829	0.016729	0.829759	0.9009	36.0442	3.26252e-32	46.9768	9.75947e-22
arf-1.2	0.969919	0.99968	1.04972	0.999945	1.1025	0.789504	1.06037	0.924685	1.17083	0.819305	1.22565	0.557569	1.14033	0.756295
arf-3	1.14449	0.99968	0.864056	0.999945	0.973053	0.948409	1.14519	0.843957	1.03191	0.983416	0.945583	0.896036	0.997337	0.995913
arf-6	0.947887	0.99968	1.05869	0.999945	0.802729	0.602462	0.750807	0.652958	0.973004	0.988094	0.953855	0.930338	1.06932	0.913641
argk-1	1.4882	0.99968	0.437907	0.999945	4.33122	0.00448207	9.66131	0.0012398	1.4956	0.692796	2.00483	0.125024	1.46093	0.515635
ari-1.1	0.933827	0.99968	0.848329	0.999945	0.844096	0.677912	0.992347	0.990836	0.948536	0.972497	1.0035	0.994639	1.1545	0.761543
ari-1.2	0.900721	0.99968	1.06536	0.999945	0.563915	0.0889662	0.521419	0.281872	0.774276	0.756007	0.591668	0.144138	0.834231	0.755179
ari-1.3	0.85565	0.99968	1.45282	0.999945	1.17218	0.690135	0.792217	0.741028	1.06912	0.961287	1.60054	0.174024	1.63003	0.180743
ari-1.4	0.729307	0.99968	0.848587	0.999945	0.221833	8.67532e-06	0.257673	0.0101427	0.311756	0.000206083	0.257049	0.000319559	0.900944	0.861093
ari-2	0.848504	0.99968	0.951185	0.999945	0.878162	0.775256	0.916139	0.894647	0.818949	0.838856	0.952899	0.929089	1.26984	0.601914
arid-1	0.685033	0.99968	1.01761	0.999945	0.584641	0.240917	0.562473	0.459324	0.824305	0.908829	0.622537	0.3869	0.824029	0.820608
ark-1	1.04017	0.99968	1.29859	0.999945	0.977642	0.961706	0.747658	0.637173	1.32416	0.722067	1.22697	0.653088	1.01101	0.985627
arl-1	1.09738	0.99968	0.98876	0.999945	0.821566	0.600821	0.83993	0.779164	1.02462	0.985651	0.85742	0.707245	0.91018	0.840678
arl-3	0.801917	0.99968	0.90911	0.999945	1.08329	0.90572	1.22952	0.851105	0.920086	0.98131	1.51402	0.54926	1.81641	0.517567
arl-5	0.950162	0.99968	1.50108	0.999945	0.768153	0.573024	0.515714	0.203884	1.10123	0.958138	0.772546	0.616951	0.766697	0.624813
arl-8	1.04647	0.99968	1.12406	0.999945	0.942892	0.896752	0.837717	0.769109	0.970252	0.985145	1.2278	0.604044	1.38184	0.364718
arle-14	0.746596	0.99968	1.24875	0.999945	0.429534	0.010585	0.337892	0.0563547	0.838189	0.844303	0.556821	0.141656	0.724933	0.471817
arp-1	0.97183	0.99968	0.996163	0.999945	1.13175	0.756121	1.13732	0.823701	1.09708	0.942823	1.44298	0.337784	1.43454	0.346195
arp-11	1.09589	0.99968	1.11916	0.999945	0.763198	0.472152	0.677804	0.500934	0.753862	0.699216	0.696638	0.374023	1.00849	0.990545
arp-6	0.811561	0.99968	1.35324	0.999945	0.499204	0.0412525	0.363026	0.0719859	1.19882	0.843716	0.694576	0.363963	0.631922	0.250055
arr-1	1.12245	0.99968	1.32654	0.999945	1.30781	0.51925	0.977522	0.97268	1.35809	0.704829	1.26886	0.616752	1.01464	0.982899
arrd-10	1.09935	0.99968	0.810475	0.999945	1.02587	0.961655	1.28395	0.738526	0.970187	0.989684	1.28578	0.642075	1.44327	0.564932
arrd-13	0.870249	0.99968	1.19451	0.999945	0.98957	0.981192	0.818222	0.752933	0.843838	0.87554	0.846536	0.744816	1.09117	0.895464
arrd-14	0.806888	0.99968	2.05756	0.985708	4.49883	1.30072e-06	2.15864	0.171361	2.58608	0.0239885	3.88061	2.28315e-05	1.63391	0.328686
arrd-17	1.21248	0.99968	1.23589	0.999945	1.7506	0.167349	1.41727	0.562192	0.972935	0.991467	1.32901	0.567656	1.49219	0.536511
arrd-18	1.40682	0.99968	1.13852	0.999945	2.0079	0.0331391	1.81441	0.411137	2.23615	0.0244978	2.14452	0.028354	1.04344	0.939694
arrd-19	1.21336	0.99968	1.30003	0.999945	1.87155	0.110977	1.44601	0.551971	1.64945	0.425597	1.93845	0.137107	1.27672	0.684315
arrd-22	1.46703	0.99968	1.20376	0.999945	1.40247	0.413093	1.17892	0.81334	1.85551	0.241793	1.94705	0.104569	1.14104	0.832491
arrd-25	1.27638	0.99968	1.84196	0.999945	2.02685	0.0243476	1.09042	0.888019	1.58864	0.276105	1.88773	0.062932	1.29357	0.531425
arrd-26	1.52636	0.99968	1.07951	0.999945	1.34393	0.600574	1.26431	0.7794	1.21966	0.938396	1.4069	0.584658	1.25584	0.811076
arrd-4	0.9041	0.99968	1.294	0.999945	1.44461	0.51173	1.13419	0.88538	1.28692	0.909263	1.29538	0.723367	1.09343	0.933458
arrd-7	0.898728	0.99968	1.25858	0.999945	3.29802	0.000385673	2.61494	0.0566776	1.1761	0.918913	3.06338	0.0018476	2.8315	0.0160334
art-1	0.994627	0.99968	0.925347	0.999945	1.28098	0.444976	1.40298	0.55145	1.02154	0.987036	1.07143	0.884536	1.14039	0.806004
arv-1	0.923087	0.99968	0.980205	0.999945	0.62501	0.219322	0.631926	0.457865	0.785748	0.735627	0.781245	0.486727	1.08448	0.885371
arx-1	1.03997	0.99968	1.15597	0.999945	1.16804	0.69451	1.01375	0.984151	1.19979	0.828679	1.35911	0.412108	1.23574	0.616439
arx-2	1.04599	0.99968	0.962014	0.999945	0.872422	0.716828	0.904568	0.870257	1.02884	0.984799	1.00972	0.98195	1.06831	0.888526
arx-3	0.982481	0.99968	1.00724	0.999945	1.23103	0.55211	1.22476	0.716886	1.03289	0.98131	1.2836	0.480647	1.35338	0.421027
arx-4	1.00137	0.99968	1.00377	0.999945	0.913636	0.830165	0.910085	0.882741	1.06261	0.972464	1.03671	0.943757	1.06402	0.923515
arx-5	0.967804	0.99968	0.926454	0.999945	0.960796	0.923757	1.03473	0.958613	0.936521	0.957458	1.03676	0.933644	1.20556	0.655771
arx-6	1.07211	0.99968	1.03321	0.999945	1.14795	0.712211	1.10705	0.869432	0.964992	0.979023	1.03525	0.933502	1.16871	0.702415
arx-7	0.878563	0.99968	0.902324	0.999945	0.81595	0.60053	0.905235	0.877417	0.905286	0.922367	0.900802	0.793419	1.08306	0.867155
asah-1	1.19009	0.99968	0.357827	0.433917	0.573041	0.250659	1.58954	0.494729	0.631989	0.538528	0.332034	0.00614346	0.572001	0.305484
asah-2	0.948067	0.99968	0.539358	0.999945	1.45586	0.255095	2.67538	0.0440376	0.522811	0.117025	1.00065	0.999233	2.08664	0.0530083
asb-1	0.899535	0.99968	0.753856	0.999945	0.202527	1.49628e-09	0.268277	0.00123722	0.689531	0.394448	0.231869	3.06312e-07	0.366037	0.001289
asb-2	1.02143	0.99968	0.815114	0.999945	1.06522	0.86788	1.33352	0.656589	0.938281	0.958443	0.885635	0.761617	1.02707	0.958046
ascc-1	0.84761	0.99968	0.710887	0.999945	0.805434	0.652475	1.11916	0.889886	0.792154	0.870625	0.958693	0.944156	1.31815	0.681216
asd-1	1.05813	0.99968	1.31713	0.999945	1.02401	0.958937	0.772801	0.6707	1.09278	0.957458	1.20569	0.663008	1.20487	0.731116
asd-2	1.64699	0.99968	0.931319	0.999945	1.21615	0.61425	1.33504	0.66817	1.22473	0.798174	1.31333	0.505078	1.16995	0.76466
asfl-1	0.815899	0.99968	0.954547	0.999945	0.130903	2.70165e-06	0.135298	0.00102266	0.548531	0.187083	0.22001	3.13792e-05	0.436703	0.070508
asg-1	0.933464	0.99968	0.981903	0.999945	0.551794	0.0441517	0.564684	0.238998	0.949161	0.968729	0.578136	0.10468	0.663574	0.273604
asg-2	1.04271	0.99968	0.889588	0.999945	1.10838	0.77181	1.26784	0.693562	1.02158	0.986135	0.869513	0.713948	0.927597	0.872921
ash-2	1.07136	0.99968	1.37606	0.999945	0.673095	0.231653	0.48417	0.175364	1.02989	0.985191	0.858804	0.731022	0.909369	0.869322
asm-1	1.21617	0.99968	1.39034	0.999945	2.06721	0.115468	1.46673	0.592727	0.973336	0.992996	2.08968	0.121835	2.32781	0.111615
asm-2	1.1992	0.99968	0.652888	0.999945	0.81049	0.752995	1.23472	0.831209	0.401875	0.491321	0.423521	0.23454	1.2466	0.895422
asna-1	0.951617	0.99968	1.07904	0.999945	1.22607	0.546917	1.13209	0.835396	1.12804	0.889736	1.47531	0.210658	1.42571	0.288807
asns-1	0.825121	0.99968	0.340209	0.590292	0.461843	0.16542	1.39919	0.737141	0.544898	0.147669	0.683638	0.538546	1.39237	0.671714
asns-2	1.2504	0.99968	1.12074	0.999945	1.93228	0.0860058	1.71979	0.366215	1.01961	0.991726	0.836712	0.675251	0.894765	0.855407
asp-1	1.13212	0.99968	0.70956	0.999945	0.529246	0.0632708	0.756882	0.650033	0.831142	0.823483	0.419729	0.01091	0.549214	0.0468743
asp-12	1.60751	0.99968	3.67142	0.51397	1.81238	0.291912	0.506777	0.404854	3.05966	0.0540664	1.49351	0.644582	0.531493	0.445656
asp-13	0.859955	0.99968	4.05884	0.202089	0.403863	0.0423415	0.101077	5.79715e-06	4.81832	9.60623e-07	0.221401	0.000273415	0.0499308	1.1957e-35
asp-14	0.903815	0.99968	0.365707	0.861722	0.631428	0.130699	1.78163	0.436853	0.772699	0.627872	0.34055	0.00305475	0.478834	0.0608082
asp-17	1.17307	0.99968	4.9344	0.177823	20.3638	8.11566e-12	4.02182	0.0232778	0.658627	0.853344	12.2658	1.85652e-08	19.0945	6.8245e-13
asp-2	0.953373	0.99968	1.42835	0.999945	0.543657	0.0369977	0.382335	0.0238313	1.51246	0.31579	0.409653	0.00159087	0.2951	1.17633e-05
asp-3	1.11273	0.99968	0.810881	0.999945	0.610703	0.146409	0.762846	0.65784	0.941215	0.962486	0.48941	0.0218571	0.565662	0.0564863
asp-4	1.009	0.99968	0.835988	0.999945	1.85227	0.0977409	2.2354	0.156844	1.05528	0.970364	1.72752	0.148754	1.77825	0.168029
asp-5	0.99638	0.99968	0.699588	0.999945	0.604851	0.0846041	0.877326	0.838885	1.02148	0.988038	0.476438	0.00847188	0.508126	0.0275606
asp-6	0.971217	0.99968	0.893541	0.999945	0.802064	0.563848	0.902588	0.87038	0.924243	0.952253	0.743704	0.453108	0.874069	0.787249
asp-8	0.937166	0.99968	1.19793	0.999945	1.0446	0.93117	0.876434	0.850187	1.24261	0.85476	1.66362	0.1396	1.4606	0.550126
aspm-1	1.23687	0.99968	1.80795	0.999945	0.293387	0.0209811	0.159178	0.00511279	1.00225	0.998655	0.364646	0.0898368	0.398804	0.209358
asps-1	1.05052	0.99968	1.09737	0.999945	0.62436	0.198381	0.561946	0.339567	0.910391	0.948549	0.683154	0.343038	0.814539	0.702834
ast-1	1.08573	0.99968	1.21175	0.999945	1.76436	0.203184	1.48538	0.601794	1.70118	0.555015	1.78621	0.249077	1.14079	0.859543
atad-3	1.00822	0.99968	0.938131	0.999945	0.537938	0.0524837	0.573671	0.290452	0.818446	0.766752	0.391184	0.000789717	0.520706	0.0376898
atat-2	1.06857	0.99968	1.29325	0.999945	1.58802	0.260851	1.25076	0.76534	1.5125	0.6308	1.63205	0.270819	1.17405	0.804843
ate-1	1.00422	0.99968	1.35633	0.999945	0.976531	0.959929	0.712426	0.591234	1.01909	0.992132	0.964613	0.942365	1.03184	0.961363
atf-2	1.63588	0.99968	2.55227	0.999945	1.18443	0.782859	0.486654	0.510773	6.00197	3.62922e-11	2.35858	0.072819	0.428235	0.0934419
atf-4	0.72522	0.99968	1.16189	0.999945	0.90722	0.806909	0.792494	0.706444	1.43672	0.394448	0.921377	0.83908	0.698997	0.327693
atf-6	1.41263	0.99968	1.25297	0.999945	1.8754	0.0791806	1.52225	0.510773	1.57693	0.48524	2.13518	0.0411064	1.47627	0.411819
atf-7	1.29199	0.99968	1.25991	0.999945	1.29395	0.490232	1.01109	0.98898	0.898622	0.928956	1.47162	0.404511	1.79084	0.192042
atf-8	2.15412	0.99968	4.83342	0.999945	1.35168	0.742516	0.2938	0.333807	10.1661	1.07755e-06	3.26636	0.136533	0.341623	0.0606879
atfs-1	0.854687	0.99968	1.25663	0.999945	1.26742	0.570544	1.00158	0.998952	0.996095	0.997789	1.39108	0.444275	1.52449	0.338155
atg-13	0.84034	0.99968	1.60445	0.999945	1.44695	0.377005	0.898412	0.877777	1.6304	0.30879	1.68079	0.183425	1.12447	0.828902
atg-16.1	1.33802	0.99968	1.28322	0.999945	1.79102	0.171451	1.39522	0.562873	1.36501	0.74946	1.76832	0.218149	1.41221	0.453562
atg-16.2	1.05575	0.99968	1.65571	0.999945	2.66668	0.0109164	1.60214	0.453573	1.11097	0.959929	3.14185	0.00126512	3.07075	0.00389849
atg-18	1.04441	0.99968	1.20104	0.999945	1.3847	0.361097	1.14546	0.833166	1.03877	0.978963	1.47617	0.222484	1.54834	0.184626
atg-2	1.30994	0.99968	1.30446	0.999945	2.11195	0.0134	1.60396	0.391462	1.46127	0.484587	2.15891	0.022329	1.60857	0.250583
atg-3	0.913387	0.99968	1.08018	0.999945	0.881764	0.784522	0.81213	0.737262	1.08499	0.959799	0.986759	0.980696	0.993077	0.990979
atg-4.1	0.997104	0.99968	1.16198	0.999945	1.55693	0.281998	1.33544	0.637545	1.0973	0.962977	1.73402	0.201192	1.7246	0.221952
atg-5	0.992784	0.99968	0.980616	0.999945	0.923064	0.840324	0.938914	0.919161	1.05283	0.971142	1.08482	0.854643	1.12213	0.817427
atg-7	1.0427	0.99968	1.51134	0.999945	1.05065	0.913563	0.687079	0.545935	1.2579	0.801678	1.19794	0.680113	1.0385	0.948525
atg-9	0.920177	0.99968	1.10975	0.999945	1.19234	0.662457	1.05564	0.945511	0.90615	0.953028	1.18155	0.706758	1.42519	0.466324
atgl-1	1.41572	0.99968	1.5039	0.999945	1.72627	0.0818135	1.12342	0.87592	1.11202	0.934271	1.54463	0.20396	1.51235	0.299932
atgp-1	1.53863	0.99968	1.71382	0.999945	1.93378	0.104169	1.12654	0.838846	1.9189	0.162223	1.36182	0.571735	0.771393	0.630377
atgp-2	1.34044	0.99968	0.915384	0.999945	1.39721	0.456357	1.53711	0.461935	1.99162	0.119047	2.97242	0.00262754	1.62853	0.182275
ath-1	1.08943	0.99968	1.02185	0.999945	0.822807	0.634998	0.803911	0.699011	0.969584	0.985145	0.981911	0.971912	1.10624	0.832491
athp-1	1.96299	0.99968	1.78782	0.999945	0.622672	0.41169	0.342093	0.135154	1.22284	0.899091	0.710966	0.584738	0.63382	0.431396
athp-2	1.7452	0.99968	2.21696	0.999945	0.872727	0.761188	0.382039	0.18565	1.14126	0.931279	1.04348	0.940581	0.994796	0.994883
atic-1	1.2753	0.99968	0.487737	0.999945	0.438411	0.0583109	0.924168	0.917788	0.741767	0.73868	0.472193	0.0939902	0.69687	0.433448
atl-1	1.29414	0.99968	1.57352	0.999945	0.778172	0.700168	0.489131	0.329212	0.97958	0.995211	0.711147	0.616752	0.792425	0.78352
atln-1	1.05955	0.99968	1.31052	0.999945	2.21287	0.0211512	1.677	0.382159	1.2583	0.689228	2.82801	0.00166513	2.44577	0.00794578
atm-1	1.51622	0.99968	1.7504	0.999945	1.24722	0.676815	0.695514	0.659599	1.12045	0.964216	1.61575	0.484795	1.57385	0.595587
atn-1	1.59168	0.99968	1.71234	0.999945	2.05032	0.0216019	1.19157	0.769292	1.21758	0.811382	1.57974	0.1951	1.41773	0.407369
atp-1	1.14515	0.99968	0.887375	0.999945	0.798116	0.490148	0.895242	0.849359	0.970628	0.98347	0.616793	0.109951	0.692166	0.255407
atp-2	1.10829	0.99968	1.02522	0.999945	1.04916	0.900579	1.02716	0.965283	1.20729	0.77067	0.930672	0.855609	0.840953	0.657338
atp-3	0.994374	0.99968	0.850043	0.999945	0.836354	0.618277	0.99507	0.994625	0.979167	0.988006	0.695378	0.299413	0.772558	0.479862
atp-4	0.872948	0.99968	0.990205	0.999945	0.894429	0.747988	0.909645	0.871004	1.0058	0.997014	0.751087	0.42842	0.813491	0.628819
atp-5	0.999411	0.99968	0.696551	0.999945	0.883867	0.749716	1.26511	0.6707	0.963391	0.978937	0.721963	0.353562	0.81506	0.608839
atp-6	1.02296	0.99968	0.910203	0.999945	0.889386	0.749856	0.990081	0.988272	1.12003	0.900534	0.903584	0.798103	0.880348	0.760557
atrn-1	1.59654	0.99968	1.07593	0.999945	1.17451	0.727165	1.08265	0.914512	1.54584	0.614045	0.86363	0.819763	0.604737	0.475925
attf-2	1.08002	0.99968	1.15705	0.999945	0.423506	0.00252809	0.363507	0.02037	0.990724	0.995918	0.527682	0.0461565	0.580261	0.103883
attf-3	1.00972	0.99968	1.29574	0.999945	0.562707	0.349102	0.424317	0.326346	0.979435	0.995211	0.77348	0.721885	0.861186	0.879834
attf-4	1.07089	0.99968	0.957391	0.999945	1.20694	0.601092	1.26971	0.672305	1.13073	0.905863	1.20378	0.654344	1.16133	0.772238
attf-5	1.7466	0.99968	1.52925	0.999945	2.00846	0.189547	1.29373	0.751208	1.79551	0.612573	1.13106	0.880044	0.682658	0.652987
attf-6	1.40414	0.99968	1.71424	0.999945	0.555953	0.110359	0.315465	0.068426	1.05606	0.974695	0.656726	0.309441	0.676085	0.387605
atx-2	1.39653	0.99968	1.59937	0.999945	1.18014	0.656502	0.72324	0.626573	1.37186	0.613865	1.39232	0.359169	1.10413	0.853508
atx-3	0.998499	0.99968	1.17461	0.999945	0.731083	0.433543	0.615753	0.434469	0.87488	0.890274	0.870792	0.744269	1.08371	0.883729
ave-1	0.569753	0.99968	1.05472	0.999945	0.553705	0.141983	0.517057	0.322297	0.80262	0.856668	0.683433	0.427625	0.929866	0.923323
avr-14	1.312	0.99968	1.07705	0.999945	1.28615	0.708452	1.23386	0.857046	1.02279	0.996172	1.48607	0.579339	1.57238	0.634624
avr-15	0.682601	0.99968	1.14189	0.999945	1.63831	0.258466	1.39416	0.704575	0.982925	0.996172	1.32075	0.616752	1.45883	0.60362
axl-1	1.00892	0.99968	0.812636	0.999945	1.60651	0.377249	2.01649	0.342539	0.707479	0.872489	1.06523	0.933304	1.65573	0.624813
B0001.2	1.01003	0.99968	1.12938	0.999945	0.501461	0.16996	0.437478	0.243808	0.73529	0.822795	0.620944	0.416885	0.922147	0.925413
B0001.3	1.05531	0.99968	1.66022	0.999945	0.845386	0.704227	0.503164	0.244974	1.2785	0.799633	0.999129	0.998941	0.849492	0.783205
B0001.4	0.880325	0.99968	1.06069	0.999945	0.68049	0.25095	0.641218	0.383894	1.04133	0.978937	0.849786	0.687521	0.890028	0.806885
B0001.5	1.06025	0.99968	0.996231	0.999945	0.706367	0.435047	0.710874	0.595102	1.25425	0.859782	0.615822	0.329572	0.530266	0.272668
B0001.7	0.914362	0.99968	1.36834	0.999945	0.220842	0.00025158	0.158497	0.00146915	0.69134	0.691656	0.33328	0.0190192	0.523281	0.291068
B0001.8	0.874326	0.99968	1.12323	0.999945	0.548827	0.107672	0.489278	0.192233	0.887179	0.937532	0.620273	0.24344	0.76362	0.650087
B0019.2	1.19596	0.99968	1.43051	0.999945	0.893997	0.868169	0.613137	0.563151	1.80337	0.623879	1.09138	0.909065	0.65329	0.642728
B0024.11	1.0682	0.99968	0.898764	0.999945	0.330179	0.000387637	0.362094	0.0492526	0.688407	0.50355	0.416431	0.00913002	0.658093	0.321636
B0024.13	0.803386	0.99968	0.946501	0.999945	0.651119	0.274055	0.679652	0.534755	0.770789	0.723611	0.707672	0.457963	1.00214	0.997572
B0024.4	0.609004	0.99968	1.59762	0.999945	2.19131	0.0144335	1.31357	0.77984	0.319382	0.00122878	2.11664	0.0431582	7.26382	3.24989e-08
B0025.4	1.46554	0.99968	1.2705	0.999945	0.904035	0.842733	0.703143	0.591075	1.40561	0.655352	1.27961	0.613918	0.993585	0.99169
B0025.5	1.06369	0.99968	0.52885	0.999945	0.0530306	7.48281e-19	0.0976939	6.66121e-05	0.342885	0.000767873	0.0623475	1.97428e-14	0.197301	0.000906528
B0025.7	0.828451	0.99968	0.952241	0.999945	0.619798	0.320054	0.645204	0.534978	0.624169	0.612538	0.90384	0.871893	1.58062	0.486207
B0025.8	0.994074	0.99968	0.607047	0.999945	0.059045	6.84911e-06	0.0947747	0.0101817	0.406331	0.287282	0.0679687	0.00031548	0.167398	0.154389
B0034.1	0.421717	0.147941	0.630571	0.999945	0.963844	0.947171	1.50036	0.599132	0.398488	0.0268138	1.27245	0.552713	3.51497	0.00239152
B0035.13	1.09876	0.99968	0.517657	0.999945	0.506431	0.083104	0.997914	0.998674	0.787725	0.796861	0.4269	0.0143817	0.591565	0.239679
B0035.15	0.899272	0.99968	1.12336	0.999945	0.798183	0.543074	0.710143	0.535865	0.801994	0.80371	0.606719	0.205153	0.822936	0.734109
B0035.18	0.799093	0.99968	1.06819	0.999945	0.135841	1.09063e-07	0.125295	0.000207235	0.724597	0.710554	0.260955	0.00447545	0.398435	0.127514
B0035.3	0.889331	0.99968	0.832013	0.999945	0.45216	0.0101084	0.542114	0.23985	0.625874	0.258617	0.516489	0.0543348	0.899274	0.848531
B0041.1	0.98079	0.99968	0.71464	0.999945	0.14502	0.00201973	0.204236	0.0743286	0.768236	0.900552	0.1355	0.00543739	0.193291	0.0825075
B0041.11	1.49473	0.99968	1.37492	0.999945	1.43271	0.515152	1.04626	0.955464	1.64956	0.629411	1.99183	0.189316	1.31896	0.670743
B0041.5	0.989144	0.99968	0.792477	0.999945	0.896516	0.776476	1.12363	0.853726	0.518892	0.0437407	0.827122	0.608438	1.73689	0.116244
B0041.8	1.14228	0.99968	1.03334	0.999945	0.270978	0.000206575	0.260565	0.00465385	0.515053	0.133014	0.386999	0.0117277	0.821026	0.724685
B0198.3	1.89345	0.99968	1.48182	0.999945	1.71165	0.367346	1.17195	0.859865	1.03647	0.992996	1.69999	0.441431	1.78647	0.536184
B0205.1	0.85577	0.99968	1.30441	0.999945	0.357481	0.0043478	0.268844	0.0235412	0.912788	0.957458	0.500854	0.0847857	0.599713	0.272152
B0205.10	1.31062	0.99968	1.16202	0.999945	0.133617	9.80335e-05	0.114077	0.00068565	0.815214	0.916892	0.197966	0.00332251	0.267421	0.0874147
B0205.12	0.973976	0.99968	0.767203	0.999945	0.774146	0.581891	1.01182	0.988272	0.727791	0.746457	0.634596	0.325027	0.946411	0.939694
B0205.13	1.18963	0.99968	2.11204	0.999945	6.66056	9.51799e-05	3.15565	0.0100382	0.418996	0.229652	7.37668	0.000106537	19.6148	6.72394e-21
B0205.8	0.895011	0.99968	0.837057	0.999945	0.611386	0.138017	0.728911	0.574033	0.896697	0.918272	0.621399	0.142925	0.754845	0.492178
B0205.9	0.969507	0.99968	1.48407	0.999945	0.508908	0.133254	0.338998	0.0567255	0.99877	0.999052	0.812468	0.718171	0.889241	0.855184
B0207.1	1.09139	0.99968	0.864516	0.999945	0.121293	0.000222523	0.138265	0.00745074	0.714224	0.837822	0.0633989	0.000154196	0.0964837	0.0126052
B0207.11	0.904388	0.99968	0.729559	0.999945	0.0912984	0.0012584	0.123607	0.0382514	0.386582	0.465557	0.285434	0.0933834	0.806359	0.901644
B0207.6	0.794158	0.99968	0.825081	0.999945	0.369047	0.00170923	0.44094	0.159558	0.645455	0.310756	0.468178	0.0165692	0.788675	0.61136
B0207.7	0.976801	0.99968	0.889083	0.999945	0.0450187	4.22669e-10	0.050701	3.6002e-06	0.866802	0.931279	0.112308	2.94235e-06	0.141174	0.000352155
B0218.5	0.887382	0.99968	0.592301	0.999945	0.210933	0.00517362	0.355984	0.229969	1.00832	0.997476	0.207122	0.0170681	0.221179	0.0431504
B0218.7	0.724841	0.99968	0.548027	0.999945	0.0503378	1.75591e-11	0.08874	0.00141509	0.372098	0.0290756	0.0670052	9.9237e-10	0.196002	0.0152825
B0222.5	0.373608	0.336733	1.15993	0.999945	2.09616	0.116931	1.75309	0.516226	0.437755	0.119024	1.66833	0.328886	4.14125	2.27094e-05
B0228.6	1.05917	0.99968	1.13954	0.999945	2.43854	0.0550461	2.17969	0.290452	1.0251	0.995211	1.92154	0.245817	2.01902	0.330145
B0228.7	1.07381	0.99968	1.02023	0.999945	0.871549	0.730403	0.8599	0.809365	1.67067	0.180315	0.873615	0.726341	0.569396	0.112839
B0238.11	0.845866	0.99968	0.84185	0.999945	0.305297	3.0819e-05	0.359478	0.0330635	0.855861	0.858645	0.473921	0.0149	0.604404	0.170176
B0238.12	1.23101	0.99968	3.55023	0.130548	32.8115	2.48869e-19	9.30597	2.47226e-05	4.64326	2.63154e-05	8.16856	4.20092e-09	1.91148	0.115001
B0238.9	0.784834	0.99968	1.0349	0.999945	0.169789	1.12585e-09	0.159975	0.0010133	0.50914	0.0366031	0.280434	1.36267e-05	0.599764	0.19294
B0244.10	0.704315	0.99968	1.05561	0.999945	2.00155	0.109081	1.86923	0.367599	0.390583	0.287564	1.32095	0.592648	3.71026	0.0509473
B0244.9	0.821164	0.99968	0.609854	0.999945	0.0733295	1.95413e-15	0.118456	5.35471e-05	0.520421	0.0981613	0.0995984	1.71033e-11	0.210076	0.000238921
B0250.5	0.958206	0.99968	1.04711	0.999945	1.18112	0.639855	1.1332	0.833878	0.873466	0.881794	0.859849	0.732314	1.07205	0.904798
B0250.8	1.43256	0.99968	1.03518	0.999945	1.04399	0.940863	1.02036	0.979948	1.26245	0.866213	0.985387	0.982122	0.851512	0.823581
B0252.3	1.00255	0.99968	0.932802	0.999945	1.45722	0.35791	1.56847	0.431726	0.793232	0.809572	1.13731	0.805266	1.55716	0.319979
B0252.5	0.86846	0.99968	0.675207	0.999945	0.228574	7.43879e-05	0.33292	0.0813228	0.777108	0.814505	0.329829	0.00605756	0.460055	0.133484
B0252.8	1.22832	0.99968	1.44897	0.999945	3.15124	0.000161795	2.21866	0.164698	1.38644	0.650504	2.63721	0.00383852	2.0729	0.0395288
B0261.1	1.25521	0.99968	1.81766	0.999945	1.03522	0.94809	0.566077	0.337588	1.16823	0.920873	1.31393	0.602441	1.22732	0.754435
B0261.5	1.01788	0.99968	0.491183	0.999945	0.124725	0.000232159	0.255203	0.141025	0.604705	0.662847	0.0947933	0.000211732	0.169368	0.0412947
B0261.6	0.90569	0.99968	0.66734	0.999945	0.0759213	2.03879e-14	0.111569	0.000107477	0.44725	0.0488731	0.0927271	1.9908e-11	0.228222	0.00243206
B0261.7	0.781886	0.99968	0.811251	0.999945	0.184378	3.56548e-08	0.22384	0.00406161	0.587226	0.232006	0.265098	8.34389e-05	0.491564	0.108552
B0261.8	1.50454	0.99968	0.869702	0.999945	1.11269	0.83586	1.30469	0.731193	1.75579	0.341052	0.89506	0.850228	0.554161	0.207803
B0272.3	1.09933	0.99968	0.622254	0.999945	0.574071	0.0985433	0.943556	0.943099	0.835229	0.82207	0.679832	0.348541	0.884171	0.824855
B0272.4	1.50823	0.99968	0.842125	0.999945	1.32692	0.53987	1.59394	0.460373	1.29314	0.805296	0.907089	0.86949	0.763416	0.656549
B0273.1	0.897395	0.99968	0.567572	0.999945	0.131438	1.0437e-06	0.228308	0.0294185	0.477039	0.199429	0.245817	0.0010122	0.572869	0.452022
B0280.17	0.759831	0.99968	0.61931	0.999945	0.120834	8.76653e-10	0.1915	0.00579091	0.453909	0.0822103	0.163002	6.31969e-07	0.395467	0.100898
B0280.7	1.71272	0.99968	1.01571	0.999945	0.365593	0.0674483	0.374865	0.340484	1.01644	0.994547	0.728077	0.674065	0.778973	0.779779
B0280.9	0.922719	0.99968	0.820832	0.999945	0.435403	0.0258502	0.526455	0.285454	0.815157	0.819305	0.434794	0.0210129	0.582216	0.163939
B0281.3	0.976426	0.99968	0.773873	0.999945	1.96557	0.239594	2.56213	0.237559	1.4236	0.818142	1.86177	0.330264	1.39413	0.720227
B0284.3	1.57553	0.99968	1.44946	0.999945	2.24597	0.143327	1.55793	0.573952	1.96793	0.584518	2.11755	0.220494	1.16705	0.872337
B0285.3	0.887	0.99968	1.17207	0.999945	0.56986	0.348756	0.482657	0.354942	1.33904	0.857491	0.656687	0.584478	0.529078	0.444057
B0286.1	0.937404	0.99968	0.931137	0.999945	1.21428	0.70458	1.32208	0.7084	0.783923	0.900534	0.692196	0.556019	0.965361	0.976573
B0294.1	1.23941	0.99968	0.912608	0.999945	1.77934	0.304335	1.97439	0.304328	0.684526	0.795545	0.755651	0.687346	1.19064	0.834671
B0302.5	1.03889	0.99968	0.902712	0.999945	1.39397	0.332643	1.55209	0.412227	1.02028	0.988094	1.32729	0.387796	1.41779	0.300441
B0303.11	1.36213	0.99968	2.81232	0.478427	4.61394	1.20685e-05	1.62087	0.434469	2.12411	0.162371	3.66009	0.00328644	1.87862	0.20165
B0303.14	1.12112	0.99968	0.869089	0.999945	1.83096	0.147531	2.12543	0.210551	1.00124	0.999052	1.60812	0.282195	1.75224	0.291475
B0303.3	1.21495	0.99968	1.01801	0.999945	1.14762	0.716066	1.14263	0.838846	1.01326	0.992599	1.22398	0.558568	1.31588	0.439303
B0303.4	1.01723	0.99968	1.75557	0.999945	0.920542	0.866921	0.517678	0.277947	1.07175	0.968729	1.13687	0.811432	1.15821	0.798174
B0303.7	1.33939	0.99968	1.15706	0.999945	2.0132	0.0217366	1.72832	0.309477	1.06405	0.971142	1.39688	0.362373	1.42769	0.447084
B0304.2	0.731003	0.99968	1.19517	0.999945	0.173431	1.84662e-06	0.142544	0.000296971	0.530149	0.202278	0.244263	0.000314006	0.503055	0.13847
B0304.4	0.74494	0.99968	0.988862	0.999945	0.314634	0.051725	0.312964	0.183494	0.426889	0.466932	0.351591	0.113858	0.901439	0.942584
B0310.1	0.914047	0.99968	1.20984	0.999945	1.21541	0.603501	1.01627	0.982073	0.979167	0.991169	0.876009	0.76288	0.977194	0.973523
B0310.2	0.647526	0.99968	0.802388	0.999945	1.93389	0.148611	2.41827	0.159894	0.919579	0.977106	1.87624	0.203843	2.22704	0.151467
B0310.6	0.915465	0.99968	0.42785	0.646224	0.368177	0.0625028	0.866489	0.884736	0.627294	0.528125	0.791309	0.717524	1.41375	0.680513
B0334.13	0.746547	0.99968	0.171465	0.0482594	0.182739	0.000322903	1.09649	0.935448	0.322997	0.00336754	0.207926	0.00984598	0.708236	0.739819
B0334.3	0.998384	0.99968	0.781348	0.999945	1.49642	0.200765	1.90201	0.204744	1.08744	0.947076	1.25233	0.557756	1.25277	0.606347
B0334.4	0.850458	0.99968	0.942746	0.999945	0.522784	0.0286065	0.545631	0.307473	0.662782	0.301739	0.551695	0.0550185	0.906647	0.84081
B0334.5	1.21604	0.99968	1.01548	0.999945	0.756423	0.418407	0.744156	0.579509	0.98244	0.989684	0.719296	0.339633	0.796834	0.573587
B0334.6	1.33205	0.99968	0.876785	0.999945	0.480899	0.297265	0.566314	0.613776	1.38282	0.866595	0.734414	0.722083	0.583993	0.585795
B0336.13	0.782061	0.99968	0.87121	0.999945	0.207094	2.07417e-06	0.234797	0.00535393	0.722455	0.530498	0.30084	3.47984e-05	0.453451	0.0182049
B0336.7	0.922323	0.99968	1.20313	0.999945	0.591437	0.134058	0.4851	0.212416	0.71507	0.641267	0.604581	0.198536	0.919929	0.899044
B0348.2	1.06135	0.99968	4.15258	0.154101	11.6241	5.19396e-10	2.74986	0.0724928	0.600456	0.739682	15.8891	5.25042e-13	30.3813	6.04893e-20
B0348.5	2.60506	0.99968	2.14098	0.999945	0.325907	0.308098	0.159464	0.195279	2.10157	0.598685	0.835375	0.870616	0.429549	0.374125
B0353.1	1.514	0.99968	0.972836	0.999945	1.02511	0.960156	1.07117	0.927152	1.00263	0.998048	1.40874	0.56695	1.52545	0.508799
B0361.2	1.14968	0.99968	1.03378	0.999945	0.705469	0.367534	0.678681	0.517956	0.934797	0.969264	0.721276	0.434256	0.840847	0.774338
B0361.3	1.18263	0.99968	1.04845	0.999945	0.869285	0.764279	0.828289	0.764544	0.96	0.982356	0.94493	0.914279	1.06972	0.903827
B0361.4	1.02912	0.99968	0.840243	0.999945	1.96179	0.161514	2.34445	0.150507	1.21812	0.915598	1.74932	0.30513	1.56167	0.414378
B0361.6	0.882162	0.99968	0.76745	0.999945	0.337195	4.17547e-05	0.433503	0.105537	0.630059	0.264269	0.373602	0.000342959	0.64612	0.279859
B0361.9	1.4245	0.99968	0.64414	0.999945	1.03715	0.935972	1.66219	0.523088	1.07264	0.96332	1.20348	0.660816	1.22094	0.660423
B0365.9	2.10896	0.99968	2.96669	0.999945	0.83816	0.801575	0.297457	0.331808	5.31701	5.20061e-05	1.69015	0.457351	0.340801	0.0354725
B0379.1	0.930338	0.99968	0.809092	0.999945	1.31904	0.432054	1.62645	0.334276	0.68204	0.391818	1.18095	0.667239	1.88443	0.0388981
B0379.2	0.915956	0.99968	0.681957	0.999945	0.0724073	1.56074e-09	0.103427	0.00119088	0.555655	0.38082	0.090372	9.19233e-07	0.174414	0.0088474
B0379.7	0.83246	0.99968	0.664311	0.999945	0.0444468	1.20027e-11	0.0646288	0.00032684	0.530086	0.2846	0.0787693	1.79201e-08	0.159961	0.0026066
B0393.3	0.831186	0.99968	1.27369	0.999945	0.124056	3.41386e-06	0.0952135	0.000149058	0.722624	0.754457	0.225048	0.00219697	0.341366	0.0329917
B0393.4	0.951077	0.99968	1.04738	0.999945	0.272365	0.0049657	0.26001	0.0317769	1.53155	0.57311	0.372857	0.0362165	0.264426	0.00457225
B0393.5	2.49937	0.610756	1.56031	0.999945	0.658798	0.544527	0.436941	0.402265	1.92089	0.479585	0.612997	0.604038	0.34045	0.218426
B0393.6	0.94985	0.99968	1.1739	0.999945	0.173787	1.0838e-08	0.145392	0.000143287	0.697565	0.569907	0.338359	0.00220853	0.529872	0.149297
B0393.8	0.77079	0.99968	1.64051	0.999945	0.935389	0.885605	0.567533	0.293743	1.34157	0.701066	1.22264	0.650845	0.996852	0.996711
B0393.9	0.673003	0.99968	1.14444	0.999945	2.69827	0.00635407	2.32893	0.16004	1.01586	0.995211	1.88785	0.139581	2.02386	0.122122
B0395.3	1.12993	0.99968	1.00542	0.999945	1.6043	0.294596	1.63511	0.527336	1.21708	0.849051	1.15465	0.748246	1.03006	0.96386
B0403.3	1.00761	0.99968	1.01374	0.999945	3.72269	0.00202414	3.70663	0.00948625	1.07169	0.98347	7.54809	6.95358e-07	7.892	4.2087e-06
B0403.5	0.917981	0.99968	0.433586	0.631358	0.877475	0.834369	2.04926	0.349577	0.575589	0.215826	1.11815	0.843678	2.14061	0.12222
B0403.6	1.27888	0.99968	1.31121	0.999945	2.29212	0.0853108	1.75283	0.421433	0.910412	0.98131	2.53218	0.114057	2.98383	0.153018
B0410.3	0.860264	0.99968	1.0314	0.999945	0.988189	0.97597	0.978821	0.977549	0.562697	0.117025	0.867504	0.82599	1.68315	0.396827
B0416.3	0.643044	0.99968	0.834545	0.999945	1.85336	0.136485	2.18984	0.209002	0.553875	0.426464	1.58644	0.335577	3.11517	0.00503816
B0416.5	1.18271	0.99968	1.29821	0.999945	1.54232	0.16753	1.19504	0.756337	1.38379	0.495411	1.32043	0.414388	1.03975	0.936232
B0416.7	0.268602	0.99968	1.67371	0.999945	4.57148	0.280542	2.66242	0.294861	0.933457	0.986135	4.64844	0.304339	5.27395	0.000113073
B0432.10	0.656387	0.99968	1.21943	0.999945	0.512918	0.153865	0.414493	0.204918	0.852511	0.937765	0.610857	0.355295	0.783168	0.769935
B0432.11	0.793215	0.99968	0.490882	0.999945	0.178188	0.0069523	0.364116	0.344548	0.861981	0.959262	0.136091	0.0262095	0.171885	0.112146
B0432.14	1.09492	0.99968	1.66421	0.999945	3.97247	4.41266e-07	2.42146	0.0766821	2.80934	0.00082774	4.6069	6.45657e-08	1.7879	0.117986
B0432.7	1.08845	0.99968	1.73361	0.999945	0.774604	0.720865	0.441629	0.307487	1.22641	0.944616	1.42741	0.608092	1.26296	0.816152
B0432.9	0.981941	0.99968	0.794396	0.999945	0.933379	0.912861	1.1849	0.832464	0.986764	0.996172	1.03201	0.96483	1.1347	0.872724
B0454.5	0.368789	0.331954	1.30377	0.999945	2.25222	0.0527598	1.71732	0.357652	1.07615	0.968729	1.91757	0.17504	1.94669	0.0984847
B0454.6	1.20486	0.99968	1.35586	0.999945	2.59215	0.106346	1.96276	0.345313	1.16144	0.958363	2.03702	0.318932	1.91318	0.358582
B0457.2	0.581486	0.99968	1.12437	0.999945	2.39176	0.0098586	2.11416	0.165615	1.06276	0.975857	2.31571	0.0618954	2.37787	0.066904
B0457.6	1.00326	0.99968	0.59852	0.999945	1.87033	0.0427003	3.15995	0.00737664	0.642587	0.315972	1.70847	0.111382	2.90134	0.000355239
B0462.5	0.646882	0.99968	1.5525	0.999945	10.3082	2.83683e-13	6.63919	2.25596e-05	1.11769	0.958443	11.6385	1.86766e-15	11.2627	1.5386e-14
B0464.6	0.855181	0.99968	1.15794	0.999945	0.374448	0.00545155	0.31848	0.0364148	0.82269	0.841115	0.536134	0.116007	0.711386	0.420142
B0464.9	0.836977	0.99968	0.953789	0.999945	0.403843	0.0255624	0.421769	0.121028	0.780988	0.815135	0.545451	0.175679	0.762517	0.614694
B0491.5	0.89614	0.99968	0.938072	0.999945	0.896405	0.767127	0.9668	0.959253	1.00324	0.997789	0.911908	0.824339	0.99185	0.990979
B0491.6	1.08835	0.99968	1.48759	0.999945	0.807619	0.699857	0.531601	0.411575	0.954841	0.985651	0.902938	0.877056	1.03111	0.973523
B0491.7	0.797978	0.99968	0.666969	0.999945	0.349876	0.000290037	0.523025	0.187643	0.704822	0.451425	0.425223	0.00489764	0.657132	0.24363
B0495.5	1.04421	0.99968	1.67419	0.999945	1.44861	0.536652	0.859672	0.860218	1.3934	0.872373	1.76262	0.399239	1.3681	0.752627
B0495.7	1.38048	0.99968	1.14103	0.999945	0.994484	0.990015	0.869692	0.813105	1.09276	0.946423	0.948598	0.908437	0.944875	0.909918
B0495.8	1.10773	0.99968	1.10314	0.999945	0.734662	0.405332	0.656347	0.508541	1.15746	0.890817	0.810487	0.617463	0.762849	0.554768
B0495.9	0.941675	0.99968	1.02422	0.999945	0.800974	0.585089	0.779874	0.679196	0.982786	0.991857	0.675765	0.313978	0.74947	0.522766
B0496.1	1.29819	0.99968	0.855824	0.999945	0.169276	0.000995129	0.199253	0.0141457	0.920132	0.971669	0.188139	0.00462955	0.223445	0.00739741
B0496.6	1.58098	0.99968	0.739807	0.999945	0.37648	0.17173	0.511443	0.534158	1.21183	0.943083	0.257757	0.0683233	0.232431	0.0952394
B0507.1	2.06777	0.650729	1.09215	0.999945	0.715647	0.601288	0.66931	0.65717	1.56947	0.520206	1.11694	0.872159	0.772483	0.693813
B0507.2	0.969164	0.99968	1.08215	0.999945	2.27583	0.0198703	2.12437	0.169616	1.26656	0.773176	2.20719	0.0206618	1.8955	0.0440555
B0511.11	0.99534	0.99968	0.591515	0.999945	0.161064	0.000555924	0.269875	0.127452	1.61666	0.596964	1.19767	0.802851	0.79542	0.795029
B0511.12	1.76525	0.99968	2.3161	0.999945	1.41105	0.326337	0.592075	0.485758	1.54968	0.445553	1.5658	0.256637	1.10037	0.884477
B0511.19	0.697278	0.99968	0.939208	0.999945	0.176744	1.74467e-10	0.184961	0.0005484	0.492928	0.020382	0.240108	3.06917e-06	0.530785	0.0995111
B0511.2	1.07105	0.99968	1.31351	0.999945	0.805862	0.59334	0.608461	0.391549	1.25087	0.807817	1.0513	0.92093	0.916782	0.881046
B0511.6	0.953938	0.99968	0.796413	0.999945	0.676427	0.237933	0.839883	0.770059	0.778748	0.704226	0.780694	0.528128	1.09213	0.871142
B0511.7	0.78091	0.99968	0.920586	0.999945	0.470202	0.124796	0.50571	0.357869	0.769849	0.87398	0.565877	0.313725	0.801719	0.808976
B0513.4	0.723978	0.99968	0.952462	0.999945	1.64137	0.221518	1.68548	0.471749	0.608724	0.305706	1.31266	0.635838	2.35257	0.0632011
B0524.6	1.09336	0.99968	1.18308	0.999945	0.489568	0.0208214	0.411572	0.0642776	0.828438	0.81677	0.636376	0.183204	0.838186	0.711253
B0545.4	0.910521	0.99968	1.26455	0.999945	3.81677	6.04069e-05	2.96648	0.068426	1.09948	0.961782	2.96957	0.0366228	2.91026	0.0588283
B0546.3	0.535339	0.99968	0.675462	0.999945	0.881428	0.839564	1.35383	0.7907	0.770075	0.893625	0.957959	0.953215	1.35063	0.733259
B0546.4	0.7285	0.99968	1.05726	0.999945	2.05157	0.0613804	1.92919	0.223062	0.99797	0.998487	1.86815	0.145371	2.04258	0.0515173
B0563.5	0.54872	0.99968	0.651079	0.999945	1.66686	0.280604	2.50031	0.236059	0.249773	0.0735654	1.04098	0.953248	4.52588	0.0285352
B0563.6	1.23511	0.99968	1.25172	0.999945	2.27644	0.0888389	1.82652	0.392201	1.10734	0.973577	1.53153	0.522441	1.49903	0.64336
B0563.7	1.05134	0.99968	0.379823	0.999945	0.785092	0.603231	2.12199	0.352539	0.710473	0.765561	0.629343	0.37239	0.954522	0.958558
B0564.2	0.870235	0.99968	1.19941	0.999945	0.787728	0.65196	0.653149	0.528925	1.06028	0.98131	1.10652	0.86998	1.13842	0.859525
B0564.6	0.797597	0.99968	0.840981	0.999945	1.28889	0.594663	1.52252	0.511325	0.673311	0.587212	1.41525	0.471634	2.29693	0.035378
B0564.7	0.977342	0.99968	1.04359	0.999945	0.709176	0.349816	0.678215	0.480004	0.960716	0.982227	0.670422	0.333768	0.759128	0.590668
B0564.9	0.805072	0.99968	0.845443	0.999945	1.29194	0.591186	1.51812	0.514516	0.675383	0.59252	1.42134	0.466244	2.29972	0.0352004
baf-1	0.89766	0.99968	0.751405	0.999945	1.17382	0.681248	1.55544	0.409978	0.797159	0.702567	1.52929	0.198503	2.08737	0.00871661
bag-1	0.850667	0.99968	0.858164	0.999945	0.47113	0.0293846	0.547971	0.262378	0.759102	0.732124	0.661195	0.300801	0.951094	0.934409
bam-2	1.4867	0.99968	1.36557	0.999945	1.85322	0.0971179	1.35657	0.586756	1.30336	0.772468	2.28019	0.0269989	1.90826	0.0762273
bar-1	1.49182	0.99968	0.938052	0.999945	1.60294	0.313945	1.71645	0.420108	1.1449	0.957458	1.91254	0.179875	1.81923	0.312765
bas-1	1.10301	0.99968	0.610755	0.999945	0.897787	0.845633	1.48852	0.57826	0.87288	0.942402	0.63712	0.451325	0.790503	0.763949
basl-1	0.937212	0.99968	0.635774	0.999945	0.055363	2.50195e-08	0.0853465	0.000765966	0.574212	0.469038	0.121455	1.82231e-05	0.235629	0.0305557
bath-1	0.710257	0.99968	1.30623	0.999945	0.38875	0.0649595	0.293873	0.0514641	1.24832	0.88255	0.629351	0.456747	0.552914	0.285066
bath-15	0.739202	0.99968	1.24257	0.999945	0.288699	0.00858703	0.228657	0.0122768	0.840968	0.914435	0.469659	0.161822	0.609779	0.297415
bath-19	0.7846	0.99968	1.13854	0.999945	0.203241	0.0216207	0.174705	0.0292925	0.450439	0.520145	0.311547	0.140822	0.758179	0.813761
bath-2	0.925615	0.99968	0.950847	0.999945	0.264409	5.02634e-05	0.272733	0.0246587	0.788292	0.766752	0.302308	0.000260501	0.4186	0.0237918
bath-24	0.946899	0.99968	1.06109	0.999945	0.686436	0.514117	0.650551	0.579786	0.896289	0.966627	0.806368	0.731867	0.976399	0.981611
bath-26	1.1776	0.99968	2.01664	0.999945	2.7506	0.0781868	1.37474	0.709097	2.11192	0.437944	1.78205	0.409281	0.912679	0.927055
bath-27	0.648691	0.99968	0.991817	0.999945	0.10766	1.32748e-07	0.107421	8.19608e-05	0.422969	0.17643	0.214671	0.000622871	0.563784	0.510506
bath-28	0.80919	0.99968	1.14627	0.999945	0.392681	0.103041	0.336135	0.181665	0.611984	0.786055	0.422458	0.195611	0.768353	0.849482
bath-29	0.727584	0.99968	0.996409	0.999945	0.227209	4.35168e-06	0.223292	0.00783364	0.708514	0.552882	0.341313	0.00503703	0.526123	0.130364
bath-3	0.615434	0.99968	0.94495	0.999945	0.449759	0.163174	0.475462	0.28168	1.01488	0.996172	0.505308	0.269476	0.545157	0.280663
bath-30	0.709184	0.99968	0.992752	0.999945	0.211207	1.03892e-06	0.208357	0.00465381	0.689412	0.496982	0.328958	0.0036391	0.521111	0.122978
bath-38	1.12527	0.99968	1.15288	0.999945	2.04462	0.0393934	1.78552	0.299807	1.27155	0.822921	1.84922	0.10803	1.58103	0.317034
bath-4	0.606046	0.99968	1.06831	0.999945	0.340426	0.0225441	0.313292	0.102897	0.68493	0.727661	0.378164	0.0513156	0.603893	0.464845
bath-40	0.937223	0.99968	1.19773	0.999945	0.758912	0.413144	0.61913	0.480517	0.85406	0.865865	0.845404	0.661225	1.07957	0.890233
bath-41	0.921793	0.99968	1.22766	0.999945	0.242707	1.36117e-06	0.192931	0.00296939	0.613026	0.189695	0.311687	3.99002e-05	0.553742	0.0962986
bath-42	0.908734	0.99968	1.02017	0.999945	0.499365	0.0165794	0.484046	0.170851	0.725759	0.493522	0.56468	0.0546107	0.848069	0.704131
bath-43	0.964186	0.99968	1.18237	0.999945	0.778128	0.524166	0.653198	0.463025	0.944428	0.968729	0.914998	0.828967	1.05468	0.914284
bath-44	0.924038	0.99968	1.68749	0.999945	0.878712	0.727165	0.513206	0.240762	1.34206	0.632343	0.974669	0.957853	0.791737	0.640693
bath-46	1.39866	0.99968	0.703683	0.999945	3.83213	0.00166775	5.49025	0.00264962	0.537589	0.659306	2.6267	0.0455153	5.31056	0.00184132
bath-5	0.821432	0.99968	1.11209	0.999945	0.242923	3.20777e-05	0.216989	0.000607493	0.819936	0.830535	0.338027	0.00321599	0.450313	0.0157933
bath-7	0.830176	0.99968	1.2518	0.999945	0.540952	0.130356	0.427126	0.163813	0.849254	0.906015	0.655686	0.35709	0.844373	0.800033
bca-1	0.947432	0.99968	0.688234	0.999945	1.45885	0.337248	2.14032	0.175332	0.767211	0.689211	1.31641	0.489531	1.86491	0.0651943
bca-2	1.04149	0.99968	1.35633	0.999945	1.6258	0.153617	1.21136	0.740448	1.39614	0.51464	1.41712	0.362921	1.10716	0.831771
bcas-2	0.936792	0.99968	1.08887	0.999945	0.534305	0.0409813	0.48381	0.179627	0.952063	0.973577	0.620006	0.151106	0.708773	0.399321
bcat-1	1.31007	0.99968	1.61498	0.999945	1.67299	0.101167	1.03011	0.963858	1.30632	0.665384	1.19985	0.666339	1.00086	0.999055
bckd-1A	1.02027	0.99968	0.934009	0.999945	0.940694	0.885018	1.00788	0.990306	0.998228	0.998048	0.739274	0.438922	0.805092	0.608624
bckd-1B	0.985501	0.99968	0.894837	0.999945	1.00052	0.99861	1.12617	0.841618	0.874744	0.871606	0.762791	0.49813	0.949673	0.923064
bcl-11	1.17882	0.99968	0.40825	0.378008	0.867131	0.76232	2.10978	0.192233	0.455974	0.0136406	0.849803	0.750774	2.03695	0.0977315
bcl-7	0.800117	0.99968	1.14222	0.999945	0.412594	0.0104716	0.35259	0.114641	0.758633	0.695853	0.553343	0.128474	0.796834	0.675264
bcs-1	0.76322	0.99968	0.998712	0.999945	0.361159	0.0178937	0.360583	0.101195	0.608863	0.564089	0.411468	0.0496085	0.731837	0.692083
BE0003N10.1	0.841071	0.99968	1.34203	0.999945	0.729219	0.559989	0.54115	0.367599	0.992123	0.997476	0.689698	0.520882	0.756891	0.71369
BE0003N10.6	1.85385	0.596748	0.147066	0.142362	0.0191973	4.57604e-39	0.137005	0.0194037	1.70621	0.0989766	0.621117	0.487857	0.398643	0.15624
BE10.1	1.02651	0.99968	0.710418	0.999945	0.0556968	3.14335e-09	0.0792374	0.000232983	0.618066	0.569907	0.162123	0.000195325	0.296518	0.0859049
bec-1	1.03305	0.99968	0.859454	0.999945	1.0719	0.873662	1.24033	0.726849	0.679203	0.365651	1.49622	0.195591	2.40139	0.00254174
bed-2	1.04184	0.99968	1.27723	0.999945	1.64798	0.16573	1.32934	0.70408	1.61527	0.346078	1.70419	0.16556	1.15092	0.788525
bed-3	1.99787	0.692795	1.16561	0.999945	0.377432	0.108669	0.338897	0.351062	1.46774	0.596504	0.878359	0.879335	0.651797	0.586734
ben-1	0.88094	0.99968	0.636938	0.999945	0.349338	0.00294255	0.542359	0.349577	0.760306	0.785428	0.411004	0.0209892	0.59274	0.353646
best-10	1.29026	0.99968	0.798268	0.999945	0.128746	0.0096604	0.16119	0.0734168	0.925716	0.984799	0.104255	0.0170654	0.12292	0.057838
best-12	1.17099	0.99968	0.998234	0.999945	0.101037	0.00145066	0.101574	0.010897	1.28767	0.895853	0.198251	0.0412273	0.1646	0.0350583
best-13	1.0701	0.99968	0.952079	0.999945	2.62562	0.0022241	2.74773	0.0333017	1.77091	0.216349	2.58285	0.00333249	1.59012	0.244479
best-14	1.05926	0.99968	2.11772	0.756849	4.17137	4.17936e-06	1.96452	0.202964	1.92844	0.148766	3.91123	5.15544e-05	2.20849	0.0473038
best-15	1.07469	0.99968	1.3025	0.999945	2.0688	0.0461477	1.57871	0.445113	1.14475	0.94575	1.55005	0.37162	1.47238	0.53471
best-18	1.00879	0.99968	1.2365	0.999945	2.29184	0.00797149	1.86944	0.238593	1.23633	0.843716	1.79258	0.122978	1.5788	0.340944
best-19	1.21878	0.99968	1.41353	0.999945	1.6007	0.228777	1.1155	0.88486	1.56704	0.534649	1.82311	0.14476	1.26675	0.674003
best-20	0.774622	0.99968	1.11241	0.999945	3.17208	0.00722875	2.74076	0.283552	0.618758	0.74946	1.93776	0.188033	3.43215	0.0347072
best-21	0.965634	0.99968	0.573977	0.999945	0.882282	0.762907	1.53508	0.432814	0.543518	0.176117	0.661026	0.334286	1.32443	0.609996
best-22	0.862653	0.99968	1.11357	0.999945	2.5192	0.00226409	2.24622	0.109447	0.872796	0.916658	1.35743	0.491363	1.69102	0.251623
best-23	1.46794	0.99968	0.972766	0.999945	0.922062	0.894176	0.966848	0.971042	1.32422	0.851845	1.03954	0.956507	0.854001	0.848495
best-24	1.06452	0.99968	1.2169	0.999945	2.58929	0.00683794	2.08762	0.263424	1.08759	0.968729	2.37077	0.0146065	2.37775	0.0474187
best-25	1.62675	0.99968	1.4061	0.999945	0.181706	0.00837362	0.1284	0.005969	1.8148	0.512415	0.262643	0.0643638	0.155478	0.00658614
best-26	1.17312	0.99968	1.00964	0.999945	0.554639	0.357572	0.556821	0.515795	0.807166	0.937765	0.279253	0.0722422	0.379523	0.352283
best-6	1.33487	0.99968	1.0704	0.999945	0.249758	0.0462715	0.23777	0.122381	2.10826	0.395276	0.356842	0.187278	0.180304	0.0143758
best-9	0.936636	0.99968	0.565779	0.999945	0.751924	0.59385	1.3589	0.725788	0.65438	0.596561	0.630327	0.414056	1.04174	0.963427
bet-1	1.18076	0.99968	1.49266	0.999945	0.882226	0.777053	0.580894	0.406119	1.08494	0.960341	1.11378	0.82599	1.12009	0.839358
bet-2	1.24054	0.99968	1.30027	0.999945	1.502	0.34818	1.14998	0.838792	1.45139	0.664834	1.25803	0.686151	0.945706	0.937805
bgal-1	1.23164	0.99968	1.16309	0.999945	1.64038	0.208297	1.39933	0.599186	1.08693	0.969155	1.32493	0.611949	1.31307	0.70645
bgal-2	1.06897	0.99968	0.769893	0.999945	1.05652	0.916188	1.38283	0.629835	1.18523	0.908629	0.680792	0.476881	0.625464	0.454015
bgnt-1.6	1.33248	0.99968	0.664235	0.999945	0.0355214	0.00247978	0.0538769	0.0535963	1.56025	0.800795	0.116127	0.0238233	0.0789448	0.00839103
bicd-1	1.4551	0.99968	1.06639	0.999945	1.55322	0.207002	1.47229	0.486873	1.10569	0.933801	1.26909	0.558294	1.24837	0.566589
bigr-1	1.24794	0.99968	0.27033	0.439289	1.42927	0.458924	5.45873	0.00202346	0.276911	0.00196172	0.865189	0.818855	3.41302	0.00249549
bir-1	0.635147	0.99968	0.824842	0.999945	0.368071	0.00713421	0.441655	0.161516	0.704395	0.629814	0.442082	0.0455427	0.685145	0.434147
bir-2	0.74167	0.99968	1.21765	0.999945	0.240492	0.001827	0.194374	0.00857803	0.758344	0.831733	0.431961	0.0898872	0.619733	0.478751
bkip-1	0.846377	0.99968	0.770154	0.999945	1.47858	0.508226	1.9454	0.421086	1.41906	0.843015	1.01899	0.981949	0.777259	0.799058
bli-1	2.22087	0.530795	2.02063	0.999945	0.466133	0.219241	0.241207	0.187105	4.40992	0.000108483	0.867735	0.870495	0.213993	0.0088474
bli-2	1.90931	0.692056	2.02781	0.999945	0.36354	0.0709355	0.188785	0.154994	3.67289	2.25277e-05	0.726209	0.666488	0.215107	0.00496642
bli-3	1.4146	0.99968	1.09328	0.999945	1.43874	0.380179	1.32152	0.624356	0.95425	0.98131	1.46053	0.39285	1.66599	0.209358
bli-4	1.28939	0.99968	1.51861	0.999945	1.1093	0.778825	0.728531	0.54981	1.12196	0.908341	0.973918	0.951969	0.945064	0.909918
bli-5	1.08874	0.99968	0.449084	0.999945	0.298228	0.0302086	0.685735	0.724269	0.720827	0.771521	0.535974	0.433588	0.820098	0.857372
bli-6	1.24359	0.99968	0.467774	0.999945	0.257838	0.218179	0.576597	0.645629	0.777128	0.653189	0.63397	0.765635	0.895175	0.958046
blmp-1	1.37163	0.99968	1.16138	0.999945	0.612933	0.13891	0.55158	0.539883	1.93106	0.0395285	1.0044	0.994316	0.567604	0.195416
blos-1	0.74733	0.99968	0.995919	0.999945	0.781998	0.535872	0.77833	0.69376	0.845571	0.88667	0.725787	0.430598	0.931896	0.91373
blos-2	0.928269	0.99968	1.13788	0.999945	0.921758	0.835614	0.80296	0.714201	0.824828	0.812819	1.02047	0.965684	1.34751	0.477697
blos-4	0.847502	0.99968	1.03536	0.999945	0.480926	0.0223343	0.45611	0.198654	0.656075	0.315288	0.531208	0.0556285	0.882062	0.806885
blos-7	0.815813	0.99968	1.20989	0.999945	0.6819	0.34818	0.553507	0.376076	0.773541	0.799633	0.73758	0.51795	1.04187	0.952121
blos-9	1.07166	0.99968	1.17371	0.999945	0.713857	0.360309	0.599537	0.407454	0.835841	0.868594	0.629037	0.23207	0.81933	0.725688
bmk-1	1.18137	0.99968	1.57662	0.999945	0.14898	5.40247e-05	0.0917145	0.000995683	0.786616	0.868365	0.353199	0.0342537	0.491745	0.302698
bmy-1	1.07997	0.99968	1.2672	0.999945	1.02653	0.954409	0.804741	0.726413	1.08683	0.957458	0.794424	0.678643	0.794489	0.729836
bpl-1	0.523319	0.99968	0.826988	0.999945	0.617901	0.38063	0.742021	0.725128	0.500735	0.558474	0.527917	0.339184	1.14682	0.915483
bpnt-1	1.10358	0.99968	0.971629	0.999945	0.708919	0.397167	0.736595	0.608049	0.954647	0.978707	0.637419	0.27998	0.725292	0.429525
bra-1	0.971504	0.99968	1.04995	0.999945	1.54408	0.365652	1.48131	0.574479	2.05226	0.266797	1.9152	0.186491	1.01074	0.99011
bra-2	0.933622	0.99968	0.928823	0.999945	0.51274	0.07829	0.543552	0.340665	0.741443	0.705753	0.553483	0.153317	0.815095	0.691572
brap-2	0.933036	0.99968	1.14791	0.999945	0.717249	0.37728	0.61622	0.417613	0.836818	0.85133	0.562496	0.107633	0.731263	0.487632
brc-1	1.05705	0.99968	1.1853	0.999945	0.249746	7.80443e-05	0.204629	0.0164977	0.987346	0.995211	0.406369	0.0471521	0.448379	0.108466
brc-2	0.971266	0.99968	1.12273	0.999945	0.385892	0.00219568	0.337375	0.047344	0.731259	0.61744	0.405488	0.00866821	0.603163	0.234178
brd-1	1.12473	0.99968	1.41548	0.999945	0.354276	0.0133182	0.246927	0.0156597	0.875796	0.950233	0.284403	0.0075336	0.349927	0.0993495
bre-1	1.29298	0.99968	0.789408	0.999945	1.06086	0.899198	1.36706	0.640724	1.263	0.726384	1.40681	0.347517	1.21219	0.628475
bre-2	0.935338	0.99968	0.923181	0.999945	1.09933	0.907479	1.2028	0.855418	0.660704	0.85094	1.01561	0.986926	1.68338	0.616052
bre-3	1.08107	0.99968	0.956722	0.999945	1.33913	0.416919	1.38441	0.595476	0.633014	0.246419	1.10625	0.80331	1.9074	0.0468397
bre-4	0.963516	0.99968	1.0075	0.999945	0.858072	0.691169	0.84889	0.786168	0.954833	0.977445	0.680739	0.326443	0.777431	0.608624
bre-5	0.869077	0.99968	0.895905	0.999945	0.450269	0.0341632	0.500941	0.242443	0.689895	0.588257	0.558594	0.134413	0.882285	0.846422
brf-1	1.00583	0.99968	1.27907	0.999945	0.510264	0.0486356	0.387943	0.169743	0.823386	0.82083	0.517037	0.0472313	0.683843	0.377895
bris-1	1.51513	0.99968	2.09188	0.999945	2.35763	0.0340425	1.1178	0.878006	1.82573	0.41873	2.3264	0.0516217	1.39095	0.553712
brp-1	1.13666	0.99968	1.70267	0.999945	4.81057	7.46923e-07	2.76745	0.102459	1.29696	0.641757	2.26113	0.0038589	1.90195	0.0330022
btb-14	0.802676	0.99968	1.10522	0.999945	1.7715	0.100989	1.61105	0.382502	0.833101	0.876862	1.3356	0.487836	1.74772	0.188785
btb-16	1.368	0.99968	1.10753	0.999945	1.46483	0.369874	1.32491	0.659416	1.4023	0.758357	1.50823	0.375599	1.17136	0.826304
btb-19	0.767036	0.99968	1.05312	0.999945	0.244747	4.61384e-05	0.227855	0.0116391	0.63446	0.48389	0.371191	0.0123425	0.637686	0.447681
btb-2	1.0913	0.99968	0.760682	0.999945	0.111624	5.06801e-10	0.148172	0.000140935	0.786874	0.762896	0.0641206	8.70837e-16	0.0884064	3.49683e-13
btb-20	0.808203	0.99968	0.650175	0.999945	0.212525	3.27755e-05	0.327603	0.0575293	0.66003	0.507058	0.268218	0.000432316	0.441867	0.0997042
btb-4	1.0461	0.99968	1.34109	0.999945	1.09739	0.869102	0.816364	0.775809	0.978976	0.99433	1.18189	0.770573	1.31614	0.68046
btb-9	0.788577	0.99968	0.862025	0.999945	2.22241	0.0677601	2.54548	0.163642	0.400772	0.40739	2.39877	0.0573444	6.4099	0.000697698
btbd-10	1.07414	0.99968	1.09375	0.999945	0.952804	0.912787	0.865437	0.816588	1.10024	0.942287	1.38448	0.412452	1.37424	0.418322
btf-1	1.11769	0.99968	1.98424	0.999945	0.744706	0.481169	0.367413	0.114469	1.31694	0.765548	1.03418	0.951086	0.855745	0.795339
bub-1	1.47804	0.99968	2.22329	0.9721	0.32951	0.00277885	0.145007	0.000671458	1.44528	0.552257	0.514249	0.0814204	0.38696	0.0151537
bub-3	0.888511	0.99968	1.077	0.999945	0.300854	6.96368e-06	0.277438	0.00259656	0.78827	0.747451	0.388008	0.000748383	0.535551	0.108588
bud-31	0.871547	0.99968	0.853282	0.999945	0.339235	0.000108556	0.393209	0.0634001	0.753344	0.580016	0.442085	0.00333249	0.639648	0.189367
bus-12	1.86128	0.99968	1.59715	0.999945	0.314448	0.100794	0.207134	0.203823	2.78267	0.0645235	1.35496	0.723937	0.523445	0.384369
bus-17	1.64531	0.99968	0.97563	0.999945	0.481729	0.0891088	0.519045	0.572721	1.76421	0.227439	0.923139	0.908378	0.568942	0.324476
bus-18	1.82814	0.99968	2.56132	0.999945	0.951549	0.941173	0.389956	0.381183	4.35718	0.000827285	2.3401	0.0736456	0.583462	0.387264
bus-19	1.53736	0.99968	0.909048	0.999945	0.632778	0.389488	0.730111	0.792347	1.27044	0.684738	1.11405	0.86998	0.959067	0.959101
bus-2	2.06699	0.99968	5.27668	0.464581	2.30959	0.094466	0.458484	0.446296	3.14123	0.0266161	1.64685	0.408676	0.568805	0.340017
bus-4	1.63056	0.99968	1.32594	0.999945	0.427352	0.118611	0.338445	0.344526	1.08125	0.968729	0.667338	0.595412	0.664757	0.649225
bus-8	2.15933	0.261646	1.85943	0.999945	0.537388	0.342503	0.304023	0.339494	2.55146	0.00182479	0.89893	0.890633	0.38453	0.103672
byn-1	1.04293	0.99968	0.985392	0.999945	0.888656	0.779756	0.893022	0.871338	0.929709	0.957458	1.05971	0.885759	1.24345	0.626236
C01A2.2	1.38164	0.99968	1.43207	0.999945	1.41029	0.313401	1.01509	0.987299	2.1935	0.00985812	1.87755	0.0580293	0.933074	0.898068
C01A2.4	0.972475	0.99968	1.22636	0.999945	2.46924	0.00372977	1.9979	0.191459	0.877306	0.918913	2.99175	0.000475468	3.72006	7.56473e-06
C01B10.11	1.71986	0.896071	1.07842	0.999945	1.11994	0.79706	1.0735	0.941995	1.21761	0.819305	1.25994	0.598879	1.12448	0.793851
C01B10.3	1.0321	0.99968	0.600561	0.999945	1.25405	0.505363	2.08682	0.110389	0.572526	0.0993774	1.18844	0.643903	2.25942	0.00472468
C01B10.6	0.959787	0.99968	0.986416	0.999945	1.24922	0.527498	1.27211	0.665876	0.753054	0.646024	1.07952	0.865451	1.56185	0.316457
C01B10.8	1.0737	0.99968	1.16614	0.999945	0.463932	0.0257295	0.39306	0.0643564	0.999919	0.99988	0.527426	0.0863268	0.573114	0.153018
C01B10.9	0.887836	0.99968	1.30102	0.999945	1.13838	0.775628	0.868749	0.829498	0.915434	0.958443	1.23201	0.661633	1.46827	0.383808
C01B12.8	0.75532	0.99968	0.971588	0.999945	0.113105	2.10741e-09	0.115151	1.63878e-05	0.587709	0.343002	0.207659	4.22091e-05	0.386376	0.0278289
C01B4.6	0.581294	0.99968	0.807518	0.999945	0.917209	0.886866	1.11159	0.911142	0.641362	0.749754	1.0526	0.942717	1.79411	0.455958
C01B4.7	1.19886	0.99968	1.99101	0.999945	3.61826	0.000431084	1.82589	0.289247	2.3074	0.0649954	5.01076	1.48004e-06	2.3737	0.0130323
C01C10.2	0.85066	0.99968	0.875217	0.999945	1.15306	0.769279	1.34336	0.684904	0.951594	0.984799	1.27671	0.628817	1.46152	0.531095
C01C4.3	1.19639	0.99968	1.09409	0.999945	2.05869	0.0798962	1.91674	0.32743	0.991099	0.997476	1.66416	0.290493	1.81601	0.216061
C01F1.3	1.25714	0.99968	2.76965	0.999945	1.76378	0.408922	0.659019	0.679196	4.64009	0.00438531	1.97943	0.356387	0.464089	0.114982
C01F1.5	2.03297	0.99968	3.22163	0.999945	0.733023	0.662457	0.239101	0.192704	5.8845	1.87354e-06	1.12232	0.891698	0.204703	0.00291354
C01F1.6	1.07077	0.99968	1.39003	0.999945	0.839632	0.718206	0.587479	0.508323	0.69972	0.75392	0.791839	0.654562	1.2395	0.787462
C01F6.14	1.15365	0.99968	1.14253	0.999945	1.25833	0.574352	1.10679	0.877316	1.08074	0.968729	1.41438	0.403477	1.42537	0.493594
C01F6.2	0.920454	0.99968	0.988432	0.999945	0.473573	0.0670745	0.466311	0.331808	0.730247	0.597371	0.554786	0.0993838	0.827399	0.725702
C01F6.9	1.0556	0.99968	0.932905	0.999945	0.611188	0.162213	0.647838	0.415194	0.985046	0.99277	0.601968	0.169308	0.66499	0.233944
C01G10.1	0.928556	0.99968	0.672894	0.999945	0.289535	0.0550791	0.43224	0.38993	0.992603	0.997789	0.247948	0.0609653	0.275244	0.167837
C01G10.14	0.958232	0.99968	0.673898	0.999945	0.0593934	8.16808e-10	0.087654	0.000106366	0.534511	0.34471	0.0891527	3.8381e-07	0.181287	0.0105564
C01G10.4	1.02799	0.99968	4.46766	0.0413124	16.858	7.95112e-13	3.75866	0.0167321	5.4121	6.14029e-05	15.7709	3.1177e-12	3.17221	0.00629215
C01G10.7	0.71374	0.99968	1.21685	0.999945	0.643094	0.354402	0.528022	0.280396	0.992869	0.997476	0.647863	0.417164	0.712683	0.573522
C01G10.9	1.05087	0.99968	0.576058	0.999945	0.673183	0.415558	1.1786	0.845018	0.86236	0.941327	0.445782	0.129346	0.55936	0.421297
C01G12.3	0.871671	0.99968	0.644683	0.999945	0.0413856	8.63026e-17	0.0628136	2.42363e-06	0.49684	0.0917496	0.0822236	3.91051e-07	0.179057	0.00393546
C01G5.25	1.04062	0.99968	1.23119	0.999945	2.41918	0.00688068	1.99636	0.23902	1.37052	0.733038	2.17474	0.0227791	1.72901	0.235342
C01G5.3	0.847594	0.99968	0.692038	0.999945	0.0963129	0.00184735	0.135039	0.0721709	0.716489	0.880376	0.15916	0.0195902	0.235074	0.185986
C01G5.4	1.0324	0.99968	0.818269	0.999945	0.107539	0.0029446	0.130282	0.0441458	0.542241	0.722774	0.174324	0.0286728	0.337443	0.415592
C01G5.5	0.814844	0.99968	1.2738	0.999945	0.778383	0.618528	0.601625	0.453413	0.979545	0.992465	0.802759	0.707186	0.897172	0.860631
C01G5.9	1.16511	0.99968	0.921763	0.999945	1.02716	0.961706	1.15028	0.890262	1.57699	0.626345	1.67305	0.344756	1.15402	0.857926
C01G6.2	0.902429	0.99968	0.600313	0.999945	0.122794	3.17528e-06	0.201138	0.0258482	0.577551	0.450873	0.133333	3.67265e-05	0.244497	0.0388498
C01G6.3	0.292114	0.626635	1.64646	0.999945	0.0554604	8.01177e-05	0.03218	0.000995683	0.190923	0.0612227	0.144984	0.0220652	0.737203	0.873886
C01G6.4	0.825192	0.99968	0.923647	0.999945	1.12427	0.766808	1.2137	0.731322	0.869755	0.881794	1.2792	0.52999	1.60442	0.150753
C01G6.5	1.31204	0.99968	1.57648	0.999945	1.38027	0.3118	0.858851	0.829976	1.21156	0.805864	1.24548	0.607536	1.12038	0.842504
C01G6.9	0.296566	0.104353	0.473418	0.999945	0.906616	0.882985	1.87611	0.460791	0.38013	0.0514829	0.634495	0.374102	1.82262	0.233817
C01G8.1	0.635948	0.99968	1.09819	0.999945	0.0475341	1.03771e-20	0.0416633	4.55416e-06	0.223026	7.14132e-06	0.119041	6.68694e-07	0.585525	0.430681
C01H6.4	0.777796	0.99968	0.687272	0.999945	1.41737	0.465976	2.08984	0.291085	0.62624	0.73441	1.40457	0.600207	2.43444	0.220349
C01H6.8	1.21416	0.99968	1.32943	0.999945	1.17665	0.766114	0.922789	0.944806	1.87609	0.276304	1.11651	0.84488	0.647437	0.409926
C02B10.3	1.23058	0.99968	0.979565	0.999945	1.06912	0.871444	1.12464	0.888179	1.4948	0.371124	1.14485	0.781484	0.836552	0.75204
C02B10.4	0.879166	0.99968	0.807773	0.999945	0.396501	0.000900405	0.48541	0.169184	0.766514	0.602973	0.47597	0.00989466	0.676068	0.268503
C02B10.5	1.0872	0.99968	1.41102	0.999945	0.678625	0.295671	0.471919	0.235704	0.917487	0.956953	1.06785	0.891376	1.26912	0.625544
C02B10.6	0.899398	0.99968	0.676399	0.999945	0.0670372	1.34383e-09	0.0978358	0.000247611	0.650166	0.579525	0.0723906	1.16529e-08	0.12359	0.000339179
C02B8.3	1.4426	0.99968	2.02365	0.999945	3.99525	2.23407e-06	2.02746	0.301298	3.37036	7.23246e-05	5.39844	4.92628e-09	1.74328	0.105142
C02B8.6	1.01299	0.99968	1.10938	0.999945	2.38464	0.0253498	2.14797	0.162397	1.6175	0.502526	3.49855	0.000586755	2.35777	0.0155931
C02D5.2	1.2915	0.99968	1.19031	0.999945	1.12918	0.801138	0.985692	0.989739	1.67888	0.332191	1.01488	0.979367	0.656391	0.341214
C02D5.4	1.09282	0.99968	0.991922	0.999945	1.75284	0.102815	1.78233	0.251552	1.52108	0.418947	2.31471	0.0180348	1.66003	0.175395
C02E7.6	1.04382	0.99968	0.337236	0.999945	0.131447	0.00011267	0.407671	0.43259	0.497919	0.049878	0.16761	0.00320538	0.368454	0.450766
C02E7.7	0.89716	0.99968	0.214159	0.378008	0.140426	0.000307213	0.68358	0.751063	0.254178	1.26371e-08	0.148528	0.000116329	0.639503	0.526052
C02F12.5	0.333705	0.390468	0.709512	0.999945	1.48824	0.382102	2.04108	0.37509	0.366837	0.753331	1.63377	0.439093	4.52537	0.0687391
C02F12.8	0.828709	0.99968	1.30862	0.999945	1.82546	0.259824	1.38228	0.67397	0.685418	0.857641	1.4862	0.609023	2.35603	0.327271
C02F4.4	1.96539	0.476292	1.61306	0.999945	0.39627	0.110014	0.259124	0.256519	2.70018	0.00188924	0.96515	0.96103	0.388385	0.0709113
C02F5.10	0.7418	0.99968	0.639501	0.999945	0.0824169	8.82722e-07	0.126802	0.00609231	0.41863	0.160256	0.155353	7.32908e-05	0.389748	0.245795
C02F5.13	0.904062	0.99968	1.42191	0.999945	0.707581	0.424101	0.492506	0.231416	1.15538	0.906183	0.873612	0.817086	0.824843	0.75364
C02F5.14	2.0644	0.539213	1.18936	0.999945	0.636457	0.312697	0.559664	0.592993	2.29832	0.0476421	0.568243	0.269677	0.267473	0.000902722
C02F5.2	1.33249	0.99968	1.04308	0.999945	0.0294062	0.000686464	0.0278358	0.00417834	0.599266	0.780007	0.153123	0.0241518	0.267081	0.304609
C02F5.3	1.03817	0.99968	0.898901	0.999945	0.689404	0.291507	0.763176	0.623992	1.06121	0.968729	0.889198	0.783926	0.911655	0.846422
C02F5.5	0.782736	0.99968	0.613647	0.999945	0.0688989	7.35093e-18	0.109435	9.6929e-05	0.441685	0.00910945	0.0800876	4.11482e-16	0.196565	1.46257e-05
C03A3.1	1.4659	0.99968	1.13658	0.999945	1.76053	0.227007	1.56738	0.50572	1.69094	0.550271	1.54062	0.446389	0.989495	0.989929
C03A3.2	1.16795	0.99968	1.06293	0.999945	0.998957	0.997641	0.944874	0.927319	1.23631	0.795545	1.15995	0.731867	1.02335	0.969931
C03A3.9	1.79127	0.99968	1.13313	0.999945	0.608659	0.493802	0.560265	0.630584	1.72134	0.476789	0.934028	0.940581	0.584334	0.503182
C03A7.13	1.73896	0.99968	1.22764	0.999945	1.75152	0.344754	1.42276	0.663026	1.54406	0.817124	1.65851	0.47578	1.1749	0.884057
C03B1.14	1.10462	0.99968	1.31471	0.999945	2.05382	0.0616754	1.55609	0.470158	1.16587	0.93988	2.24045	0.0443154	2.10101	0.130152
C03B1.7	0.890893	0.99968	0.856009	0.999945	0.744854	0.621336	0.857098	0.874761	0.601359	0.775465	0.801068	0.748863	1.47715	0.738497
C03B8.2	1.05557	0.99968	1.03813	0.999945	0.382551	0.0681477	0.362113	0.20639	0.915911	0.969155	0.390457	0.0594485	0.465099	0.238473
C03B8.3	0.815071	0.99968	0.644272	0.999945	0.131991	4.16956e-08	0.201881	0.00509862	0.561028	0.312115	0.169392	2.39145e-05	0.325715	0.0415726
C03B8.6	0.619571	0.99968	0.887647	0.999945	0.782083	0.683109	0.870181	0.879368	1.02265	0.996172	0.984435	0.984026	1.03685	0.9793
C03C10.2	1.26067	0.99968	1.13768	0.999945	0.171793	0.00725184	0.148932	0.0212044	0.864289	0.959629	0.162969	0.0421593	0.199634	0.16996
C03C11.1	0.820431	0.99968	0.604163	0.999945	0.0530407	1.57126e-15	0.0861177	2.12983e-05	0.50442	0.153232	0.106425	3.38365e-09	0.230124	0.004622
C03D6.1	1.11587	0.99968	0.897009	0.999945	1.53084	0.276137	1.72691	0.371392	0.986353	0.995211	1.04831	0.936742	1.15872	0.830238
C03F11.2	1.57936	0.99968	0.522454	0.999945	0.384614	0.194024	0.755484	0.829505	0.432263	0.553297	0.47825	0.422603	1.23475	0.89609
C03F11.4	1.07074	0.99968	0.956041	0.999945	2.04268	0.0742598	2.13231	0.204918	0.814067	0.923091	1.09779	0.883185	1.45658	0.643716
C03H12.1	1.12358	0.99968	0.820247	0.999945	1.29464	0.566483	1.58709	0.418425	0.942715	0.978454	1.16411	0.802886	1.34913	0.632785
C03H5.10	1.51202	0.99968	1.18242	0.999945	1.09269	0.900987	0.931486	0.938245	1.34336	0.871606	1.28546	0.732314	1.03875	0.970634
C03H5.3	0.953865	0.99968	1.14643	0.999945	0.480432	0.150992	0.418147	0.199269	0.991159	0.997022	0.567293	0.277707	0.625207	0.416513
C03H5.5	1.20779	0.99968	1.10928	0.999945	1.48716	0.269441	1.35642	0.615025	1.35053	0.712302	1.05199	0.926041	0.848317	0.787679
C04A11.1	0.996994	0.99968	0.467149	0.999945	0.785	0.598535	1.71915	0.466503	0.515583	0.319211	0.687188	0.422374	1.48406	0.592394
C04B4.2	0.309805	0.632416	1.7462	0.999945	0.026177	1.4774e-07	0.0142925	5.69775e-05	0.121433	0.00151637	0.209116	0.03992	1.79152	0.64042
C04C11.1	0.561065	0.99968	0.504754	0.999945	0.90654	0.885438	1.79027	0.476471	0.343358	0.243063	0.973673	0.973638	3.05387	0.146682
C04C11.23	1.22063	0.99968	0.799649	0.999945	1.53375	0.156803	1.93117	0.16841	0.933787	0.957768	1.06772	0.873276	1.24686	0.597799
C04E12.2	1.17134	0.99968	1.15593	0.999945	1.89811	0.0983876	1.6666	0.424402	1.60812	0.525041	1.12825	0.82527	0.760523	0.669834
C04E6.11	1.10251	0.99968	1.27098	0.999945	0.49772	0.0622284	0.381305	0.14648	0.744642	0.722084	0.415759	0.0264835	0.605753	0.296365
C04E6.13	1.3896	0.99968	1.14315	0.999945	3.57921	0.000923694	3.17677	0.0529838	1.85602	0.425597	3.05048	0.00868172	1.78641	0.269953
C04E6.5	1.30613	0.99968	0.874216	0.999945	0.114609	0.000635299	0.129547	0.0128171	0.972867	0.992996	0.216953	0.0328071	0.236361	0.0953779
C04E6.7	0.965097	0.99968	1.39076	0.999945	2.98567	0.00149953	2.18564	0.208744	1.90218	0.186082	2.64283	0.0203414	1.51223	0.443575
C04F12.1	1.36266	0.99968	1.85234	0.999945	1.73648	0.155324	0.917151	0.917636	1.0961	0.963164	2.07436	0.0640537	2.06091	0.0925625
C04F12.12	0.588225	0.875517	0.630526	0.999945	0.0547743	4.68233e-17	0.0847117	2.828e-05	0.397478	0.00417882	0.0767744	1.02536e-13	0.208388	0.000416769
C04F12.16	0.987799	0.99968	0.763694	0.999945	0.632259	0.558269	0.808951	0.864144	0.595479	0.791435	0.374104	0.206187	0.667764	0.775504
C04F12.5	0.88999	0.99968	1.10351	0.999945	0.409218	0.0563301	0.368354	0.105777	0.788029	0.876899	0.487614	0.172717	0.677331	0.597226
C04F12.7	0.88453	0.99968	0.676449	0.999945	0.0662769	3.3256e-17	0.0953523	4.77744e-05	0.503559	0.0176281	0.0953024	7.01124e-15	0.20569	1.129e-06
C04F12.8	0.613819	0.99968	0.547503	0.999945	1.69729	0.117715	3.05611	0.039063	0.426275	0.0332182	1.25324	0.580963	3.20299	0.00106693
C04F5.8	0.919297	0.99968	1.1452	0.999945	0.575142	0.136936	0.497841	0.224861	0.9318	0.968767	0.627725	0.256491	0.73657	0.591459
C04F5.9	1.18909	0.99968	1.48463	0.999945	0.951299	0.937609	0.626739	0.577069	1.03178	0.991593	1.00277	0.997176	1.05954	0.951195
C04G2.10	1.30616	0.99968	1.31943	0.999945	1.22229	0.703294	0.940606	0.942434	1.21626	0.920051	0.886307	0.856843	0.793434	0.787462
C04G2.14	0.769661	0.99968	2.2713	0.591663	4.48762	3.04708e-07	1.97431	0.175375	1.58443	0.508437	1.99266	0.251172	1.37864	0.69004
C04G2.5	0.882872	0.99968	0.433551	0.999945	0.095289	2.89503e-05	0.216294	0.106298	0.48963	0.43203	0.0612899	3.41755e-05	0.131508	0.0386657
C04G2.9	0.769017	0.99968	0.461105	0.859318	0.0635911	1.51763e-22	0.135125	5.46187e-05	0.421193	0.0014615	0.0757054	4.96843e-21	0.195502	1.13869e-08
C04G6.10	0.844041	0.99968	0.263307	0.945612	0.310708	0.0759683	1.23944	0.88586	0.327359	0.0126989	0.526919	0.33345	1.7983	0.503865
C04G6.15	1.06338	0.99968	1.11598	0.999945	0.756249	0.613084	0.673617	0.587757	1.10117	0.968776	0.682059	0.539938	0.674916	0.603541
C04G6.2	1.64649	0.99968	0.272021	0.923579	0.0756664	2.31207e-10	0.289679	0.205431	0.663345	0.582289	0.095819	7.82522e-06	0.155631	0.000348913
C04G6.4	0.989886	0.99968	1.21507	0.999945	0.794554	0.563739	0.651484	0.434301	1.14388	0.906183	0.935283	0.892583	0.892227	0.824549
C04G6.5	1.22176	0.99968	0.696912	0.999945	1.97574	0.070863	2.81791	0.0314734	0.727199	0.684738	1.63404	0.234674	2.44428	0.0143112
C04G6.7	0.759526	0.99968	0.201538	0.503373	0.344997	0.169286	1.79499	0.696761	0.216957	0.0147825	0.535284	0.473463	2.71977	0.37795
C04H5.1	1.0039	0.99968	0.997805	0.999945	0.518334	0.0730774	0.51953	0.23999	0.799109	0.826369	0.4054	0.0212474	0.552653	0.243059
C04H5.7	0.237266	0.259981	2.92072	0.999945	9.4556	3.04708e-07	3.07568	0.349564	0.0743348	0.00130898	6.57677	0.000846572	95.9952	1.48996e-12
C05A9.2	1.03502	0.99968	1.33252	0.999945	2.35943	0.00844645	1.79979	0.334486	1.53673	0.500308	2.04454	0.0401223	1.44789	0.409926
C05B5.12	1.09179	0.99968	0.950384	0.999945	0.077696	0.000320087	0.0809961	0.00232514	0.708189	0.851319	0.083237	0.00139415	0.128334	0.0335554
C05B5.2	0.879383	0.99968	0.781256	0.999945	0.0825668	3.23009e-13	0.102284	0.00068565	0.502732	0.11632	0.146985	2.65442e-06	0.317335	0.038725
C05B5.4	0.715291	0.99968	1.10561	0.999945	1.44834	0.457718	1.32525	0.70099	1.26278	0.895853	1.85879	0.192564	1.59688	0.457207
C05B5.8	1.37985	0.99968	0.764836	0.999945	1.87014	0.0432255	2.46958	0.0605552	0.926964	0.956814	1.82565	0.0490571	2.14398	0.0105564
C05C10.2	1.19111	0.99968	1.87881	0.999945	0.687084	0.347773	0.359092	0.0810623	1.0694	0.968729	0.746882	0.479896	0.760982	0.584968
C05C10.3	0.968221	0.99968	1.12989	0.999945	0.783573	0.513375	0.688686	0.521888	0.752234	0.662614	0.606672	0.161398	0.877873	0.818925
C05C10.5	0.584262	0.935301	1.18402	0.999945	0.065257	7.26721e-12	0.0531899	3.29159e-05	0.242423	1.32647e-06	0.130676	2.21821e-06	0.590498	0.387719
C05C10.7	0.622329	0.99968	0.789833	0.999945	0.142893	0.00015339	0.179189	0.0180989	0.746539	0.843571	0.413011	0.123151	0.617864	0.592912
C05C12.1	1.05001	0.99968	0.63342	0.999945	0.133159	0.00291438	0.210508	0.128571	0.839713	0.953631	0.142401	0.0151072	0.178113	0.0976674
C05C12.4	1.13913	0.99968	0.422885	0.499213	0.977879	0.954477	2.33757	0.0767198	0.531866	0.0492798	0.793656	0.513374	1.62547	0.161927
C05C12.5	1.02868	0.99968	0.592392	0.999945	0.0680557	1.01566e-12	0.112246	0.000242951	0.511083	0.0833406	0.116848	1.13272e-10	0.248475	0.000516155
C05C12.6	1.17266	0.99968	1.22986	0.999945	1.91483	0.0954305	1.57223	0.467153	0.866185	0.949641	2.14344	0.0573707	2.6897	0.0448065
C05C8.1	1.07306	0.99968	1.70355	0.999945	1.49947	0.266078	0.884498	0.84876	1.2023	0.854393	1.24762	0.658695	1.12421	0.85938
C05C8.5	1.08463	0.99968	1.34039	0.999945	0.594723	0.231865	0.437613	0.191662	0.869689	0.939177	0.711756	0.500775	0.895786	0.88816
C05C8.7	0.933283	0.99968	1.53795	0.999945	1.64362	0.160082	1.09631	0.909868	1.58592	0.179139	1.94519	0.0212127	1.33575	0.41926
C05C9.1	2.18659	0.974723	1.81699	0.999945	0.365855	0.109294	0.210317	0.135901	2.02652	0.38785	0.960098	0.970893	0.51039	0.4396
C05C9.3	1.57298	0.99968	1.28048	0.999945	2.64857	0.0224086	2.04347	0.300282	0.707265	0.886619	1.75595	0.341257	2.6699	0.236348
C05D10.4	1.31868	0.99968	0.786239	0.999945	0.88711	0.815318	1.15185	0.866489	2.68515	0.00266084	2.07005	0.055929	0.838652	0.734569
C05D11.1	1.07309	0.99968	1.19413	0.999945	0.800378	0.559676	0.658961	0.477526	1.00707	0.996984	0.871384	0.753585	0.942146	0.911703
C05D11.13	0.857051	0.99968	0.866749	0.999945	1.25822	0.691835	1.45946	0.624432	1.04062	0.9896	1.22261	0.75237	1.28026	0.769669
C05D11.5	0.61343	0.99968	0.930279	0.999945	1.71747	0.217971	1.85385	0.255214	0.872181	0.943121	1.5627	0.400803	1.95574	0.171003
C05D12.1	1.50433	0.99968	0.909864	0.999945	0.906683	0.811143	1.01781	0.983072	1.16324	0.881794	1.20694	0.663309	1.12957	0.830659
C05D12.3	1.20941	0.99968	0.875803	0.999945	0.87882	0.806909	0.993367	0.993816	0.636147	0.502176	0.397217	0.0213442	0.676817	0.473372
C05D12.7	0.926131	0.99968	1.01812	0.999945	1.55364	0.333434	1.55024	0.534656	1.07265	0.978475	0.895422	0.860877	0.909861	0.912791
C05D2.10	0.8343	0.99968	1.32777	0.999945	0.826727	0.692638	0.612801	0.474158	1.18603	0.900534	1.02087	0.972946	0.939468	0.923323
C05D2.11	1.21428	0.99968	1.46242	0.999945	2.45758	0.00933208	1.68962	0.36301	2.01946	0.0623069	2.34371	0.00767846	1.26344	0.601944
C05D2.8	1.09735	0.99968	1.03049	0.999945	1.42267	0.323924	1.37965	0.567347	0.930102	0.963016	1.26684	0.571975	1.48209	0.368989
C05D9.12	0.746371	0.99968	0.874675	0.999945	0.215829	0.00166238	0.238921	0.0721294	0.514043	0.451474	0.272498	0.0129992	0.581272	0.549673
C05D9.3	0.980204	0.99968	0.512623	0.999945	0.533598	0.259375	1.04254	0.968432	0.442143	0.489263	0.515395	0.278935	1.29892	0.842036
C05D9.9	0.357433	0.455514	1.69755	0.999945	4.61002	0.00249036	2.65774	0.168003	0.931835	0.987036	2.78166	0.0765305	3.27858	8.89596e-05
C05E11.3	1.61879	0.99968	0.74476	0.999945	0.667833	0.314657	0.923657	0.932305	1.12576	0.938706	1.0875	0.897216	1.05014	0.950641
C05E7.1	1.68453	0.99968	0.749705	0.999945	0.364804	0.0481346	0.507963	0.528853	1.04199	0.98398	0.463443	0.141657	0.483336	0.19294
C05E7.2	0.525697	0.538107	0.213475	0.0713621	0.167111	0.000181675	0.801184	0.823701	0.251562	4.62536e-05	0.201465	0.00017271	0.884074	0.888262
C05G5.1	1.27691	0.99968	0.921694	0.999945	1.14576	0.786742	1.24469	0.756814	0.915049	0.968729	1.14875	0.797758	1.36586	0.627246
C05G5.3	1.0347	0.99968	1.43748	0.999945	2.61079	0.0330691	1.81261	0.329212	0.760761	0.894947	1.70144	0.356387	2.41463	0.139588
C05G5.7	2.08914	0.543633	2.81265	0.999945	0.982332	0.9805	0.368848	0.426997	5.67492	8.9732e-11	2.05721	0.234674	0.397403	0.116406
C06A1.12	0.821653	0.99968	1.83672	0.999945	0.211084	3.07892e-06	0.111181	0.000427234	0.755737	0.754446	0.389146	0.00815216	0.554865	0.257321
C06A1.2	0.947012	0.99968	1.11832	0.999945	1.58053	0.174516	1.43116	0.521286	1.0928	0.950233	1.53847	0.241504	1.53496	0.252958
C06A1.3	0.807498	0.99968	0.717879	0.999945	0.0646865	3.24476e-11	0.0891318	3.81493e-05	0.598006	0.412902	0.100485	7.90177e-08	0.181837	0.00154436
C06A1.6	0.707847	0.99968	0.208851	0.189581	0.212097	0.0203925	1.05832	0.970713	0.389084	0.135098	0.533176	0.402792	1.57169	0.687343
C06A1.7	0.583891	0.99968	0.246001	0.148902	0.299996	0.0582631	1.25518	0.854873	0.266327	0.016108	0.413318	0.149047	1.83655	0.574879
C06A12.3	0.892528	0.99968	1.29715	0.999945	2.67449	0.0124391	2.04416	0.257569	0.665014	0.796545	2.19609	0.1103	3.57999	0.0231751
C06A5.12	1.12536	0.99968	1.98346	0.999945	0.631132	0.401654	0.32043	0.057284	2.72275	0.0366031	0.816265	0.761893	0.324856	0.0206164
C06A5.3	0.869987	0.99968	1.30268	0.999945	0.598758	0.201998	0.450299	0.237795	1.02672	0.989684	0.646662	0.332922	0.686011	0.471539
C06A5.8	0.603486	0.99968	0.990309	0.999945	0.195534	0.000460072	0.192917	0.0202071	0.453262	0.287678	0.263285	0.0151077	0.637813	0.652265
C06A6.2	1.05283	0.99968	1.48187	0.999945	1.3878	0.372038	0.938847	0.91923	1.67969	0.249136	1.53432	0.400297	0.995875	0.996079
C06A6.4	0.61407	0.99968	0.866339	0.999945	0.900314	0.800601	1.02323	0.975721	0.547387	0.122046	0.846733	0.716702	1.68348	0.206084
C06A6.7	0.884466	0.99968	0.587485	0.999945	0.151752	3.93914e-05	0.258457	0.059773	0.663382	0.726406	0.192434	0.00191861	0.330485	0.171781
C06A8.6	0.994569	0.99968	0.728549	0.999945	0.106799	1.43999e-08	0.144479	0.00104583	0.582487	0.45949	0.106504	5.20684e-07	0.206094	0.0138101
C06A8.8	1.21282	0.99968	0.949699	0.999945	1.57258	0.171162	1.66955	0.332939	0.802346	0.799633	1.38314	0.402363	1.88038	0.103883
C06B3.6	1.08149	0.99968	1.43866	0.999945	4.03183	0.000241433	2.80645	0.0563547	1.13914	0.926358	2.34037	0.0173088	2.23099	0.0312818
C06B3.7	1.24418	0.99968	0.965213	0.999945	4.63951	0.000114901	4.8205	0.00317958	0.802345	0.946506	2.20131	0.160161	2.99262	0.106332
C06B8.2	1.28687	0.99968	0.940402	0.999945	2.35828	0.0609048	2.50266	0.103228	0.778546	0.904925	2.33187	0.108859	3.23654	0.0262008
C06B8.7	1.44672	0.99968	0.941092	0.999945	0.930427	0.894527	1.0002	0.999737	1.1709	0.90789	1.31738	0.573192	1.22286	0.714458
C06C3.10	1.71903	0.99968	1.01484	0.999945	0.471159	0.240969	0.482872	0.503918	1.29586	0.833201	0.97695	0.975151	0.822827	0.814307
C06C3.4	1.87343	0.997917	2.15982	0.999945	1.77091	0.285117	0.854701	0.891876	4.4203	3.69136e-06	2.12418	0.0690833	0.522549	0.0906877
C06E1.1	0.932884	0.99968	1.95055	0.999945	4.38123	4.42897e-05	2.24583	0.15066	1.76845	0.489263	6.87805	1.53256e-09	4.21103	3.16221e-05
C06E1.7	1.35728	0.99968	0.75732	0.999945	0.750472	0.567612	0.990886	0.991533	0.719828	0.817405	0.941362	0.929022	1.42323	0.657419
C06E1.9	1.00665	0.99968	1.31502	0.999945	0.790814	0.720416	0.588808	0.549831	1.5732	0.733115	1.01307	0.988221	0.698442	0.679347
C06E2.1	0.885618	0.99968	0.522143	0.999945	0.480222	0.157909	0.947596	0.961343	0.780162	0.895853	0.525498	0.322036	0.753297	0.78886
C06E2.5	1.20794	0.99968	1.29665	0.999945	1.88821	0.185813	1.46549	0.590826	1.37155	0.836558	1.88828	0.212598	1.50009	0.548688
C06E4.2	1.43805	0.99968	0.977313	0.999945	1.68294	0.172524	1.78506	0.506109	1.15782	0.921762	1.73679	0.157776	1.63468	0.29923
C06E7.2	0.74288	0.99968	1.01368	0.999945	1.25852	0.669898	1.22824	0.801998	1.08823	0.9723	1.54476	0.370056	1.5462	0.469351
C06E7.4	1.61569	0.997917	0.650263	0.999945	0.609803	0.436556	0.96573	0.975979	0.928302	0.958278	0.834793	0.769966	0.980972	0.982899
C06E8.5	0.495528	0.99968	0.461219	0.999945	0.330785	0.0493513	0.6972	0.72277	0.275582	0.0319009	0.628929	0.474825	2.61734	0.26381
C06G1.1	1.23247	0.99968	0.440343	0.999945	0.384754	0.0921683	0.908288	0.937726	0.689902	0.42871	0.56745	0.309283	0.901448	0.899548
C06G1.2	2.43613	0.198495	0.857666	0.999945	0.240736	0.00859531	0.295186	0.288629	1.05395	0.984799	0.573294	0.468907	0.614514	0.637206
C06G3.6	0.882094	0.99968	1.0743	0.999945	1.33797	0.576314	1.26358	0.759805	1.01308	0.996183	1.53877	0.429923	1.64533	0.400916
C06G3.8	1.06215	0.99968	1.09264	0.999945	0.573722	0.255324	0.525811	0.340207	0.948542	0.985145	0.541572	0.283094	0.62394	0.562032
C06G4.4	0.939913	0.99968	0.696885	0.999945	0.130339	3.65115e-08	0.184751	0.00206128	0.634547	0.354495	0.139776	1.53039e-08	0.239708	0.0003931
C06G4.6	1.87134	0.882759	0.892299	0.999945	0.357883	0.0838537	0.419256	0.448781	1.01984	0.992599	0.696239	0.640025	0.747882	0.750758
C06H2.2	0.760299	0.99968	0.728985	0.999945	0.776545	0.524401	1.05459	0.943301	0.726322	0.689228	0.708359	0.414652	1.06113	0.927526
C06H2.7	0.512238	0.99968	2.29414	0.999945	3.71722	0.0031742	1.56199	0.640206	0.401116	0.479585	2.7667	0.0545506	7.42341	0.000222026
C06H5.6	1.51003	0.99968	1.23802	0.999945	1.76245	0.137982	1.41795	0.566847	1.72228	0.404427	1.58632	0.271388	1.00136	0.998946
C07A12.18	1.44557	0.99968	0.630395	0.999945	0.663724	0.581111	1.10114	0.951517	0.883911	0.973577	0.675284	0.654344	0.835817	0.896097
C07A12.2	0.951921	0.99968	1.21228	0.999945	4.29611	0.000157626	3.56668	0.00720648	1.22381	0.897512	3.432	0.00294594	3.05776	0.00129366
C07A12.7	1.35348	0.99968	0.889727	0.999945	1.92798	0.0794704	2.16965	0.148078	1.33421	0.726406	2.01647	0.0805245	1.63863	0.276287
C07A4.3	0.731799	0.99968	0.287259	0.262383	0.655394	0.370094	2.25124	0.280979	0.277349	0.020382	0.451065	0.0926844	1.80992	0.46579
C07A9.12	1.1826	0.99968	1.08091	0.999945	3.10676	0.000542489	2.93804	0.0743286	1.62574	0.446541	2.67222	0.0176824	1.78592	0.227679
C07A9.9	1.11778	0.99968	0.798563	0.999945	1.30613	0.597647	1.643	0.467153	2.00346	0.0582347	2.56271	0.0068362	1.39679	0.452022
C07B5.4	0.952465	0.99968	1.75391	0.999945	2.48123	0.0523362	1.42326	0.613103	1.43084	0.848302	2.3107	0.107494	1.74275	0.448614
C07B5.8	1.36969	0.99968	0.842988	0.999945	0.688071	0.555966	0.820481	0.836913	0.596972	0.770507	1.55817	0.469413	2.84457	0.150566
C07D10.1	1.01483	0.99968	1.35676	0.999945	2.85973	0.0195945	2.07701	0.27657	1.05871	0.985651	2.20195	0.155318	2.23948	0.22855
C07D10.5	1.16968	0.99968	0.682441	0.999945	2.96879	0.0175109	4.3241	0.00979502	0.829122	0.893639	2.24385	0.071116	2.93561	0.00744922
C07D8.6	0.934835	0.99968	0.460904	0.460609	0.311927	5.1292e-06	0.676896	0.436368	0.680431	0.344352	0.467906	0.0169609	0.750663	0.518822
C07E3.10	1.36561	0.99968	0.891861	0.999945	0.26369	0.0226604	0.31261	0.403914	1.34969	0.796573	0.591612	0.475357	0.471208	0.325379
C07E3.3	1.3294	0.99968	0.99153	0.999945	3.26473	0.00536647	3.33493	0.0518451	1.23065	0.928717	5.24072	0.000233146	4.67484	0.00234937
C07E3.4	0.912292	0.99968	0.858381	0.999945	0.0317035	0.00112438	0.0373253	0.0134542	0.893533	0.973577	0.183905	0.036984	0.226611	0.18274
C07E3.9	1.34814	0.99968	2.031	0.999945	4.7627	5.69749e-05	2.33831	0.120265	1.40674	0.833835	3.55593	0.0116289	2.74728	0.0609202
C07G1.6	0.636648	0.99968	0.542197	0.999945	0.0537133	1.03134e-09	0.0982843	0.00122373	0.56751	0.426711	0.108281	1.39872e-06	0.208422	0.0162998
C07H4.1	0.908037	0.99968	0.836327	0.999945	1.83795	0.136653	2.1851	0.174811	0.712516	0.66273	1.28796	0.58184	1.97471	0.0958542
C07H6.2	0.901208	0.99968	0.940344	0.999945	0.799174	0.545312	0.837926	0.79388	0.789885	0.706631	0.720403	0.373493	0.993113	0.990783
C07H6.4	0.923311	0.99968	0.933729	0.999945	0.58086	0.205582	0.611799	0.490554	0.742258	0.772444	0.521142	0.156588	0.762489	0.67939
C08B11.9	1.09553	0.99968	0.983898	0.999945	0.745298	0.500195	0.75442	0.668056	1.15716	0.906015	0.930468	0.881258	0.875092	0.817135
C08B6.10	0.673041	0.99968	0.921363	0.999945	1.45424	0.442633	1.56635	0.533419	0.890088	0.968729	1.58542	0.38196	1.93848	0.318862
C08B6.11	1.1591	0.99968	1.22009	0.999945	1.46994	0.304877	1.20501	0.752262	1.06933	0.968729	1.73621	0.139005	1.77234	0.115513
C08B6.3	0.967688	0.99968	0.655692	0.999945	0.711363	0.428157	1.09763	0.899945	0.823274	0.877453	0.746229	0.563601	0.982357	0.982899
C08B6.4	1.5673	0.99968	1.4191	0.999945	0.511484	0.367946	0.374522	0.371878	1.56451	0.751938	0.666644	0.61869	0.458827	0.274705
C08B6.8	0.917113	0.99968	0.834695	0.999945	0.582828	0.0920256	0.696391	0.510773	0.667864	0.377258	0.528509	0.0434642	0.861963	0.764428
C08E3.13	0.899145	0.99968	0.513922	0.999945	4.25948	9.22928e-05	8.29591	4.76249e-05	2.14677	0.374928	1.1811	0.814493	0.597136	0.510413
C08E8.10	1.18833	0.99968	0.999361	0.999945	1.48434	0.382819	1.50578	0.53973	1.61469	0.405804	2.01974	0.093985	1.36792	0.557025
C08E8.4	0.955791	0.99968	1.28538	0.999945	6.43794	0.00023097	5.03253	0.00463768	0.945346	0.98131	9.55387	5.53409e-07	10.8859	4.59993e-15
C08F11.1	1.1343	0.99968	1.11351	0.999945	2.09247	0.0755719	1.89673	0.322269	0.682536	0.766752	1.07803	0.901105	1.71891	0.421027
C08F11.10	0.916058	0.99968	0.521637	0.999945	0.0665208	8.30125e-09	0.124923	0.00396175	0.695505	0.612201	0.155283	8.16754e-06	0.245887	0.00530077
C08F11.13	1.20117	0.99968	0.733278	0.999945	1.82361	0.160202	2.53752	0.0575293	1.47311	0.632821	1.57747	0.350544	1.17386	0.800342
C08F8.2	0.982933	0.99968	0.99129	0.999945	0.503884	0.0447683	0.503334	0.201278	0.803274	0.817126	0.501038	0.0688491	0.674625	0.439191
C08F8.3	0.824106	0.99968	1.46107	0.999945	0.236138	0.000123917	0.157716	0.00199439	0.667275	0.534649	0.343282	0.010715	0.562623	0.224675
C08F8.6	0.758839	0.99968	0.491698	0.999945	0.0955665	2.94231e-07	0.191879	0.0266354	0.43036	0.186506	0.0966903	5.84886e-06	0.243628	0.0922413
C08F8.9	0.855056	0.99968	1.00658	0.999945	0.608493	0.125027	0.604248	0.334422	1.10516	0.933405	0.569742	0.0891175	0.562146	0.102165
C08G5.7	0.871684	0.99968	0.897306	0.999945	3.07848	0.00206792	3.47328	0.0232778	1.15036	0.933548	3.87174	0.000195325	3.65501	0.000909319
C08G9.1	1.11993	0.99968	1.28695	0.999945	2.28943	0.00608999	1.79623	0.272689	1.29221	0.74956	1.88936	0.0684406	1.59237	0.275916
C08H9.15	0.535751	0.99968	0.926557	0.999945	2.09543	0.083182	2.27614	0.0789105	0.967656	0.986462	2.54978	0.046809	2.87766	0.0050355
C08H9.16	0.596806	0.99968	1.26569	0.999945	0.549481	0.30498	0.430703	0.278943	0.811342	0.923144	0.654088	0.510852	0.872979	0.897058
C09B7.2	1.06781	0.99968	1.06878	0.999945	1.39246	0.320578	1.31511	0.621175	1.20958	0.796861	1.26974	0.543923	1.14325	0.78552
C09B8.3	1.45177	0.99968	1.72274	0.999945	0.323874	0.155267	0.198345	0.22477	1.78154	0.613939	0.4307	0.318121	0.259319	0.0696046
C09B8.8	0.603658	0.99968	0.617512	0.999945	1.35349	0.584589	2.1635	0.331705	0.388588	0.468347	0.855505	0.841622	2.41955	0.413468
C09B9.2	1.00063	0.99968	0.774705	0.999945	0.118707	1.74655e-07	0.150744	0.00179535	0.700937	0.658909	0.111497	1.1836e-07	0.173465	0.000584823
C09B9.4	0.754579	0.99968	0.552892	0.999945	0.0832665	6.5016e-11	0.148355	0.00129661	0.435195	0.0528162	0.111064	2.45607e-07	0.274073	0.0338562
C09B9.7	0.815918	0.99968	0.909268	0.999945	0.105021	0.000904596	0.114584	0.00974138	0.743211	0.888297	0.107348	0.00497715	0.157749	0.0702457
C09B9.85	1.04462	0.99968	0.537457	0.999945	0.12253	0.00112993	0.233148	0.16731	0.963317	0.989684	0.175125	0.0098383	0.197557	0.0344738
C09D4.1	0.923524	0.99968	4.62594	0.00411394	3.36295	0.000256168	0.730251	0.569015	4.57242	2.28344e-06	3.05038	0.00214325	0.727316	0.478097
C09D4.2	0.945321	0.99968	1.50256	0.999945	4.01712	0.00010495	2.65661	0.07903	1.15658	0.910111	3.12424	0.00437254	2.92849	0.00979919
C09D4.3	0.95814	0.99968	0.71487	0.999945	0.0698752	3.77876e-17	0.0974737	5.93024e-07	0.660672	0.430964	0.122542	7.74947e-11	0.203183	2.30161e-05
C09D4.4	1.26741	0.99968	1.60967	0.999945	0.821583	0.621076	0.50077	0.281582	1.00732	0.997133	0.886572	0.797151	0.955503	0.944749
C09D4.9	0.999532	0.99968	0.486501	0.999945	0.0581758	1.99608e-09	0.118033	0.00156582	0.630632	0.591797	0.104495	2.24889e-06	0.182379	0.00496642
C09E7.4	1.15878	0.99968	1.38118	0.999945	1.23907	0.75439	0.886114	0.897245	1.07824	0.983078	1.28368	0.772079	1.29616	0.813323
C09E7.7	1.2668	0.99968	1.59897	0.999945	1.10883	0.8476	0.681923	0.60079	1.46381	0.66007	1.36489	0.530597	1.01641	0.982527
C09E7.8	0.946008	0.99968	2.0139	0.999945	0.86904	0.821947	0.415841	0.347738	1.08828	0.977211	0.831698	0.806864	0.826077	0.84661
C09E8.1	1.32037	0.99968	1.32787	0.999945	1.75425	0.0856196	1.32081	0.612673	1.30875	0.712006	1.3311	0.467125	1.10628	0.846922
C09E9.1	0.722103	0.99968	1.0439	0.999945	1.05117	0.914701	0.999578	0.999679	1.01544	0.992996	1.26157	0.590625	1.35627	0.441198
C09F5.1	1.44452	0.99968	1.23354	0.999945	2.03282	0.0324707	1.67444	0.390052	1.67994	0.263691	2.34702	0.0187073	1.52086	0.317764
C09F9.1	0.688949	0.99968	0.584202	0.999945	0.0835716	8.91208e-08	0.142164	0.00417834	0.561136	0.49965	0.113872	1.26446e-05	0.229607	0.0555303
C09F9.2	1.44238	0.99968	2.46321	0.999945	0.450263	0.0797318	0.192384	0.137124	4.88125	3.05024e-08	1.93181	0.261589	0.431425	0.119116
C09G1.5	1.01312	0.99968	0.920476	0.999945	1.60986	0.203092	1.77723	0.351395	1.23667	0.862731	1.80429	0.140856	1.5887	0.359467
C09G4.4	1.5262	0.99968	1.02582	0.999945	0.329173	0.000207727	0.316331	0.0235412	1.0591	0.968729	0.402059	0.0226804	0.414449	0.0373019
C09G9.1	0.768933	0.99968	0.924461	0.999945	0.617815	0.140655	0.662547	0.46925	0.659259	0.272468	0.677157	0.238541	1.11941	0.80841
C09G9.5	0.809891	0.99968	1.32218	0.999945	2.65556	0.0340915	2.06523	0.355367	1.7874	0.571059	3.4851	0.00633817	2.11464	0.12917
C09H10.5	0.986039	0.99968	1.24646	0.999945	0.706866	0.310816	0.557837	0.3399	2.06558	0.00672219	1.6858	0.0847857	0.889408	0.788986
C09H10.9	0.895904	0.99968	0.95788	0.999945	0.13598	0.00375118	0.141595	0.0237873	1.13611	0.966824	0.338307	0.132965	0.323867	0.181272
C09H5.7	0.761872	0.99968	0.714645	0.999945	0.0993416	3.58012e-07	0.137532	0.00146218	0.665007	0.668646	0.122615	1.87988e-05	0.200458	0.00966222
C10A4.10	0.429934	0.99968	0.945511	0.999945	2.836	0.0101142	2.94085	0.111814	0.514354	0.58821	2.02899	0.16381	4.23904	0.0103534
C10A4.3	1.29218	0.99968	0.804478	0.999945	1.39122	0.585422	1.761	0.514148	1.31612	0.89912	1.20413	0.807695	0.995953	0.997572
C10A4.4	0.46772	0.99968	0.978038	0.999945	2.08861	0.163145	2.05231	0.484988	0.144758	0.0210157	1.35824	0.658683	10.0958	0.000961585
C10A4.9	0.909695	0.99968	0.82624	0.999945	0.582394	0.347456	0.724826	0.743831	1.01793	0.992996	0.802793	0.673518	0.862828	0.833498
C10B5.1	0.913911	0.99968	1.22723	0.999945	0.332452	0.00492775	0.267113	0.0231579	0.782874	0.785428	0.42348	0.0215723	0.589492	0.283142
C10B5.3	0.954711	0.99968	0.765806	0.999945	1.43235	0.435255	1.88834	0.215365	0.535332	0.228712	1.13207	0.834548	2.31791	0.0519507
C10C5.3	0.160416	0.0275414	1.07143	0.999945	1.26806	0.726094	1.13838	0.917288	0.29306	0.0554051	1.2714	0.721853	4.68058	0.00103354
C10C5.4	0.360603	0.0970139	0.374621	0.649728	0.837037	0.723794	2.18873	0.30353	0.607922	0.392061	0.515961	0.0861288	0.922088	0.906475
C10C5.5	0.256336	0.431915	0.958819	0.999945	1.27596	0.717069	1.28707	0.824406	0.271641	0.154865	1.40822	0.619714	5.63988	0.00552219
C10C5.7	1.06194	0.99968	1.54209	0.999945	3.35543	0.00172515	2.18228	0.182747	2.35961	0.186253	2.53365	0.054788	1.16324	0.849482
C10C6.7	1.0149	0.99968	0.831659	0.999945	0.206849	0.00169073	0.253056	0.0669203	0.585595	0.613939	0.181991	0.00263082	0.334261	0.174352
C10E2.1	1.53332	0.99968	0.912306	0.999945	0.812807	0.797584	0.899522	0.923212	1.22708	0.950736	1.19506	0.843406	1.06019	0.961539
C10G11.1	0.945133	0.99968	0.485199	0.999945	0.051052	2.11024e-05	0.102531	0.0358298	0.453551	0.466414	0.0458896	0.000171303	0.106715	0.105695
C10G11.6	1.43081	0.99968	1.55041	0.999945	1.02674	0.965914	0.654404	0.570418	0.729753	0.876226	0.991533	0.991338	1.49408	0.671389
C10G11.8	0.78518	0.99968	0.807009	0.999945	0.0609278	3.82079e-10	0.0731463	0.00025717	0.51355	0.138249	0.106156	8.14845e-08	0.225658	0.00372825
C10G8.4	0.27219	0.99968	8.41455	0.999945	38.5621	0.000203191	4.37109	0.526584	0.187353	0.00630545	27.2362	0.0207585	159.052	4.81628e-06
C10G8.8	0.695862	0.99968	0.836061	0.999945	1.4993	0.204874	1.77841	0.273007	0.761599	0.588257	1.34406	0.435029	1.91934	0.0497862
C10H11.7	0.734691	0.99968	0.547499	0.999945	0.0490753	4.83699e-05	0.0873906	0.0259215	0.392289	0.370858	0.149371	0.00490203	0.435322	0.537772
C11D2.4	0.95942	0.99968	1.03194	0.999945	0.6827	0.306575	0.656342	0.467047	0.859516	0.880376	0.55807	0.133714	0.708376	0.420976
C11D2.7	1.04649	0.99968	0.992182	0.999945	0.887344	0.734235	0.899265	0.856339	1.08322	0.947508	0.886741	0.775044	0.891388	0.821143
C11E4.6	1.16452	0.99968	0.973345	0.999945	1.2835	0.565617	1.33262	0.647392	1.26156	0.826204	1.03555	0.953323	0.892072	0.851475
C11G10.1	1.38626	0.99968	1.63761	0.999945	2.65764	0.00171269	1.64656	0.399791	1.57671	0.328047	2.60001	0.000951637	1.7959	0.0915919
C11H1.2	1.33015	0.99968	0.864755	0.999945	1.14255	0.782506	1.34967	0.690717	0.925675	0.971142	0.928704	0.89929	1.08995	0.902074
C11H1.3	1.43733	0.99968	1.04646	0.999945	1.05645	0.910737	1.0236	0.974331	1.07203	0.968336	0.863992	0.771586	0.875709	0.790191
C11H1.5	1.6968	0.99968	2.97327	0.999945	0.744018	0.709796	0.262285	0.255718	7.79136	3.23086e-10	2.51229	0.112239	0.34929	0.0291251
C11H1.7	1.51719	0.99968	1.25159	0.999945	1.31726	0.713014	1.0754	0.949127	1.42264	0.869222	1.17063	0.875769	0.893354	0.927055
C11H1.9	1.46285	0.99968	1.34913	0.999945	1.35935	0.50705	1.03678	0.969502	2.51394	0.0184024	1.35342	0.572441	0.58515	0.196434
C12D12.1	1.50104	0.99968	1.1841	0.999945	1.66015	0.0886416	1.38099	0.599078	1.1132	0.93338	1.23916	0.529014	1.21412	0.71397
C12D5.3	1.45271	0.99968	2.62402	0.923579	2.01396	0.253085	0.77463	0.77009	1.7044	0.653189	1.04677	0.959081	0.665686	0.627343
C12D5.9	1.06013	0.99968	0.736068	0.999945	0.940181	0.934491	1.28619	0.790422	0.975272	0.99433	0.707891	0.641733	0.788392	0.817593
C12D8.9	1.10619	0.99968	0.690513	0.999945	0.0813901	1.69468e-05	0.11535	0.01113	0.629468	0.728889	0.122399	0.00157194	0.210182	0.132001
C13A10.2	1.04142	0.99968	1.01402	0.999945	2.57101	0.00716093	2.55423	0.077839	1.38391	0.763014	2.44282	0.0167112	1.92422	0.159941
C13B4.1	0.98017	0.99968	1.15959	0.999945	0.81635	0.66052	0.685562	0.641988	0.839937	0.852938	0.916307	0.840979	1.18824	0.731116
C13B7.6	0.785415	0.99968	1.53256	0.999945	0.541071	0.14831	0.344827	0.120903	0.874244	0.942287	0.628743	0.331586	0.780388	0.718333
C13C12.2	1.1482	0.99968	1.1288	0.999945	0.5065	0.347592	0.473614	0.602413	1.95559	0.124502	0.961534	0.964035	0.536781	0.383082
C13C4.4	1.04623	0.99968	0.667927	0.999945	0.770243	0.585645	1.1488	0.857046	0.861945	0.935589	0.488787	0.172844	0.618308	0.513598
C13C4.6	1.25252	0.99968	0.610711	0.999945	1.53717	0.470507	2.56731	0.280396	0.851051	0.957756	1.34501	0.65005	1.72698	0.502703
C13F10.1	1.19821	0.99968	0.751986	0.999945	0.886134	0.815132	1.18778	0.796481	0.822845	0.881794	1.18715	0.751541	1.56258	0.324344
C13F10.5	0.92459	0.99968	1.2111	0.999945	0.702354	0.325329	0.573835	0.340081	1.07176	0.958896	0.763131	0.462811	0.775971	0.550354
C13F10.6	0.608181	0.99968	1.09403	0.999945	0.39262	0.0713326	0.355937	0.0880969	0.897891	0.960841	0.414605	0.148461	0.502648	0.239445
C13F10.7	0.749972	0.99968	0.828331	0.999945	0.409554	0.00701944	0.49065	0.19461	0.627216	0.327834	0.504402	0.0444018	0.878282	0.814307
C13G3.1	0.80924	0.99968	0.796041	0.999945	2.38714	0.00552643	2.98611	0.0208851	0.7183	0.675345	2.34028	0.0667461	3.55094	0.00643664
C13G5.2	0.700762	0.99968	1.08198	0.999945	0.367781	0.0102336	0.33038	0.141351	0.816892	0.871606	0.503498	0.129946	0.67302	0.500039
C14A11.9	1.02131	0.99968	0.805165	0.999945	1.35516	0.398669	1.68638	0.319989	0.968024	0.985651	1.3393	0.460878	1.51218	0.362723
C14A4.12	1.28144	0.99968	1.81246	0.999945	2.44943	0.0114994	1.32999	0.680481	1.46592	0.658075	2.35953	0.0186772	1.7539	0.205966
C14A4.6	1.04954	0.99968	0.577442	0.999945	0.871553	0.730403	1.5171	0.445113	0.764245	0.6642	0.871436	0.733083	1.24073	0.609942
C14A4.7	1.24383	0.99968	0.908717	0.999945	1.11192	0.814377	1.24841	0.76534	0.987333	0.994859	0.983434	0.971912	1.08407	0.884261
C14A4.8	0.916487	0.99968	0.453088	0.999945	0.133712	0.000542382	0.296775	0.230339	0.621613	0.727661	0.134399	0.00344036	0.237637	0.141565
C14A4.9	1.42795	0.99968	2.70578	0.999945	0.577512	0.420791	0.224546	0.23936	4.73132	1.62714e-06	1.23956	0.790678	0.285272	0.0281827
C14A6.13	0.986286	0.99968	0.921003	0.999945	0.0838142	7.06039e-07	0.090571	0.000203593	0.866184	0.943083	0.216568	0.00211752	0.274985	0.0403139
C14A6.6	0.971577	0.99968	0.596475	0.999945	0.06545	1.07647e-10	0.10956	0.000223348	0.574169	0.446098	0.107267	2.26316e-07	0.205847	0.0148915
C14A6.8	0.819361	0.99968	0.508992	0.999945	0.114971	0.000243512	0.223711	0.0947527	0.743985	0.8589	0.0905137	0.000678762	0.12932	0.0171431
C14B1.12	0.653755	0.99968	0.910396	0.999945	0.250171	0.0141215	0.269322	0.121198	0.631989	0.736482	0.420723	0.163983	0.726417	0.743978
C14B1.2	0.56816	0.99968	0.913967	0.999945	0.117867	8.54029e-09	0.125066	0.00173576	0.432703	0.0533947	0.249274	0.000450484	0.63054	0.382692
C14B1.3	1.08252	0.99968	0.852014	0.999945	1.66166	0.15249	1.97509	0.228435	1.21612	0.842275	2.23958	0.0178791	2.00581	0.0578518
C14B1.8	0.822203	0.99968	1.09935	0.999945	0.595051	0.163832	0.536826	0.283934	0.640681	0.483921	0.58536	0.16556	0.997212	0.997509
C14B1.9	0.707576	0.99968	0.966001	0.999945	0.08703	2.09325e-14	0.0876755	3.14154e-05	0.308297	0.000102834	0.119602	1.09388e-10	0.421828	0.0632973
C14B4.2	1.14393	0.99968	0.917411	0.999945	1.58275	0.345948	1.74245	0.413291	0.863258	0.950233	1.74607	0.242522	2.19886	0.143906
C14B9.10	0.997824	0.99968	1.0144	0.999945	0.962123	0.920687	0.956164	0.942371	1.00395	0.997597	0.75206	0.3964	0.817048	0.597799
C14B9.2	1.53736	0.99968	1.05856	0.999945	1.32496	0.406893	1.27205	0.70142	1.48027	0.342146	1.46543	0.249077	1.07816	0.873743
C14B9.3	1.29849	0.99968	0.978767	0.999945	1.03987	0.938572	1.08463	0.920702	1.41668	0.694282	1.13215	0.808442	0.866731	0.832491
C14B9.8	1.54693	0.99968	1.9147	0.999945	1.52717	0.249966	0.783846	0.716886	1.10133	0.957203	1.47228	0.331728	1.45401	0.435488
C14C10.1	0.840667	0.99968	0.827306	0.999945	0.121256	1.16053e-08	0.142161	0.00217746	0.552681	0.276679	0.179409	2.08762e-05	0.35229	0.0358313
C14C10.2	0.723043	0.99968	0.815222	0.999945	0.799735	0.765432	0.974271	0.981413	0.7255	0.892143	0.810117	0.811432	1.2044	0.884477
C14C10.5	1.29527	0.99968	1.44866	0.999945	0.970839	0.95338	0.656543	0.505283	1.19941	0.857638	0.897402	0.831346	0.813401	0.668101
C14C11.1	0.97501	0.99968	0.74639	0.999945	0.0939898	4.50509e-09	0.122558	0.00152504	0.612374	0.460981	0.166694	5.73846e-06	0.297551	0.0273218
C14C11.2	0.919508	0.99968	1.04119	0.999945	0.28626	0.0654233	0.268317	0.178248	0.492459	0.520206	0.309689	0.0545506	0.686823	0.756245
C14C11.4	0.746513	0.99968	0.644918	0.999945	1.69476	0.155324	2.64399	0.0596107	0.710589	0.746675	1.17206	0.754108	1.80571	0.280841
C14C11.7	0.926888	0.99968	1.1968	0.999945	0.523188	0.100847	0.438848	0.114469	1.33651	0.668704	0.814097	0.704371	0.66574	0.421027
C14C6.2	0.927247	0.99968	1.37412	0.999945	4.27612	4.70488e-05	3.1207	0.0230569	0.870883	0.920051	3.43665	0.0083658	4.29773	0.00238473
C14C6.5	0.915599	0.99968	0.352361	0.863211	0.879395	0.844349	2.49293	0.0613542	0.879708	0.979023	0.638492	0.508779	0.781236	0.734677
C14E2.12	0.603718	0.99968	0.514647	0.999945	0.645931	0.519954	1.22498	0.849961	0.66192	0.781203	0.547292	0.351736	0.894802	0.912791
C14F11.4	0.670156	0.99968	0.599495	0.999945	1.05266	0.91136	1.72836	0.39591	0.271184	4.6985e-06	0.950367	0.920946	3.85788	0.000488208
C14F11.6	2.03971	0.99968	3.15895	0.999945	0.725864	0.648564	0.242121	0.260507	3.84837	0.000744683	1.15635	0.866762	0.323917	0.0476667
C14H10.2	1.36495	0.99968	0.759295	0.999945	1.00236	0.996147	1.34738	0.695561	1.17652	0.916152	1.0569	0.936587	0.973467	0.972317
C14H10.3	1.73764	0.882759	1.32998	0.999945	1.37571	0.357639	1.05253	0.944414	1.88366	0.0941329	1.72195	0.0947462	0.99502	0.993532
C15A11.2	0.940086	0.99968	0.774514	0.999945	0.162328	0.00414735	0.208326	0.0754582	1.02826	0.992996	0.109314	0.00375513	0.116099	0.0131626
C15A11.4	0.757491	0.99968	0.722602	0.999945	1.39359	0.514031	1.9545	0.353309	1.28438	0.914435	5.52643	4.32563e-05	4.71435	0.0135116
C15A11.7	0.482383	0.99968	1.50274	0.999945	7.13865	8.98971e-09	4.7063	0.00131816	1.96576	0.216349	8.67668	5.0203e-10	4.8225	5.67463e-07
C15B12.1	1.17087	0.99968	0.423661	0.999945	0.810426	0.663623	1.95373	0.379918	0.83261	0.908341	0.782613	0.682604	1.02198	0.982173
C15C6.1	1.11602	0.99968	0.698833	0.999945	0.341461	0.0344485	0.513409	0.585087	0.634367	0.455082	0.374321	0.028753	0.647978	0.501177
C15C6.2	0.883766	0.99968	0.636837	0.999945	0.0694355	2.97415e-14	0.106109	0.000243966	0.381272	0.00399539	0.0955505	1.68567e-12	0.273588	0.00537263
C15C6.3	0.836615	0.99968	1.12256	0.999945	0.725988	0.413457	0.646624	0.44188	0.8615	0.900534	0.926877	0.872159	1.17287	0.773543
C15C7.4	1.33782	0.99968	1.72015	0.999945	2.59414	0.0155073	1.52692	0.516742	1.50944	0.688391	1.61242	0.340844	1.16214	0.836489
C15C7.5	1.2806	0.99968	0.577512	0.999945	0.719594	0.358164	1.26627	0.715131	0.9461	0.968729	0.848497	0.73215	0.978481	0.973286
C15C7.7	1.03738	0.99968	0.676542	0.999945	0.931136	0.865652	1.39851	0.592153	0.822778	0.838856	0.902309	0.817457	1.19399	0.736669
C15C8.4	1.05484	0.99968	1.17103	0.999945	0.669096	0.237896	0.567702	0.295974	1.03141	0.985145	0.799155	0.591045	0.844505	0.748568
C15C8.7	0.831614	0.99968	1.16838	0.999945	1.14855	0.733179	0.975955	0.970973	1.04936	0.973577	1.16405	0.72812	1.2106	0.64568
C15F1.1	0.638538	0.99968	0.632849	0.999945	1.16989	0.733619	1.81868	0.382693	0.507184	0.0751435	1.00694	0.989216	2.17586	0.0469966
C15F1.2	1.67265	0.99968	4.00875	0.999945	0.754143	0.683215	0.197836	0.141152	6.32375	1.03863e-06	2.49646	0.142337	0.425569	0.116244
C15F1.5	0.833361	0.99968	0.886028	0.999945	0.285814	0.00392892	0.315926	0.117713	0.826263	0.908829	0.242091	0.00463358	0.312419	0.0749544
C15H11.1	0.629091	0.99968	0.55994	0.999945	0.195531	0.000698903	0.334957	0.266125	0.340726	0.0618333	0.301421	0.00475867	1.00273	0.99875
C15H11.11	0.832148	0.99968	0.777412	0.999945	0.816804	0.724318	1.07076	0.944414	0.786902	0.894547	0.725143	0.590625	1.00289	0.998285
C15H7.3	0.883772	0.99968	0.567551	0.999945	0.0805032	1.43644e-07	0.140705	0.0045144	0.667753	0.624277	0.151283	1.09747e-05	0.244792	0.00837973
C15H7.4	1.09994	0.99968	0.616987	0.999945	0.170453	0.018571	0.274638	0.259116	0.655704	0.843404	0.208453	0.0736353	0.33769	0.420242
C15H9.11	0.484515	0.99968	3.27429	0.353403	10.8156	5.24751e-10	3.25441	0.0490464	1.94337	0.393987	6.34579	1.98533e-05	3.56557	0.00432404
C15H9.4	0.961366	0.99968	0.906786	0.999945	1.52298	0.239815	1.67633	0.349375	0.918546	0.960129	1.42776	0.402363	1.69043	0.249577
C15H9.5	1.4885	0.99968	1.27192	0.999945	2.21697	0.0180637	1.75214	0.269923	1.6826	0.271126	1.78365	0.142908	1.15647	0.78443
C15H9.9	0.866956	0.99968	0.997904	0.999945	1.37683	0.400005	1.38323	0.579131	0.860281	0.837046	1.0747	0.87167	1.3601	0.443001
C16A11.10	0.736266	0.99968	0.990674	0.999945	0.333159	0.0018832	0.333593	0.0399234	0.808342	0.822795	0.29184	0.00151457	0.392371	0.0435215
C16A11.2	0.809148	0.99968	1.08307	0.999945	0.681533	0.404661	0.627666	0.477526	0.586819	0.479585	0.702875	0.463651	1.30333	0.711264
C16A11.3	0.80622	0.99968	1.05042	0.999945	0.444052	0.0376108	0.418386	0.132507	0.873508	0.928717	0.548424	0.168167	0.687738	0.491367
C16A11.4	1.0364	0.99968	1.3085	0.999945	0.498564	0.0333137	0.378786	0.0400037	1.19532	0.824171	0.530126	0.0636172	0.483944	0.0172186
C16A11.7	0.990584	0.99968	0.648525	0.999945	0.106169	3.78964e-06	0.161916	0.00815032	0.475712	0.388604	0.0972238	5.11423e-05	0.223036	0.11885
C16A3.11	0.951902	0.99968	0.764041	0.999945	0.624073	0.443222	0.823768	0.842974	0.849122	0.95565	0.561955	0.414859	0.709147	0.751295
C16A3.2	0.701181	0.99968	0.961382	0.999945	0.347211	0.00319822	0.35653	0.0726881	0.66352	0.438032	0.456969	0.0419587	0.752441	0.593157
C16A3.4	0.792262	0.99968	0.817911	0.999945	0.581486	0.0662864	0.704236	0.525081	0.80665	0.739329	0.768604	0.453455	1.0383	0.939354
C16A3.5	1.01035	0.99968	0.937969	0.999945	0.976426	0.95227	1.04789	0.941057	0.948854	0.971142	0.83721	0.653139	0.961316	0.941849
C16A3.6	0.88836	0.99968	1.08203	0.999945	0.822804	0.613846	0.752672	0.642641	1.18715	0.81677	1.16206	0.681267	1.06628	0.893106
C16B8.3	0.920708	0.99968	1.1526	0.999945	1.58847	0.127639	1.3562	0.617249	1.06107	0.968729	1.91718	0.033026	1.9687	0.0500281
C16B8.4	1.17848	0.99968	1.19546	0.999945	1.03502	0.951996	0.899869	0.923602	1.33642	0.791895	0.816275	0.726914	0.661613	0.422268
C16C10.1	0.592229	0.99968	1.14111	0.999945	0.584702	0.160298	0.503786	0.278438	0.768512	0.740388	0.699747	0.435031	0.994514	0.993066
C16C10.13	0.650383	0.99968	0.557503	0.999945	0.1035	1.63368e-05	0.179658	0.0595402	0.480933	0.377258	0.0875502	2.83816e-05	0.200651	0.073299
C16C10.2	0.986681	0.99968	0.932395	0.999945	0.5281	0.0828572	0.56219	0.340219	0.787528	0.819168	0.557037	0.14893	0.773581	0.676661
C16C10.4	1.19431	0.99968	1.36412	0.999945	0.492042	0.0476434	0.363904	0.0351623	1.23777	0.782008	0.719032	0.414548	0.633761	0.218936
C16C10.8	0.86904	0.99968	0.753139	0.999945	0.411892	0.00330689	0.544797	0.224353	0.810032	0.785625	0.506691	0.0352026	0.680763	0.318621
C16C2.4	0.912969	0.99968	1.09321	0.999945	0.791932	0.608713	0.716359	0.616854	0.942693	0.977106	0.976159	0.968137	1.12999	0.844064
C16C8.11	0.799565	0.99968	0.921798	0.999945	0.246293	0.000693685	0.2627	0.0372882	0.598608	0.512943	0.306538	0.00767846	0.55255	0.392059
C16C8.12	0.866309	0.99968	1.15849	0.999945	0.269478	0.000403495	0.227006	0.0194644	0.421027	0.0626147	0.312361	0.00375683	0.794158	0.767487
C16C8.13	0.918434	0.99968	1.57137	0.999945	0.427247	0.0976178	0.267326	0.0502882	0.785402	0.896998	0.470204	0.194047	0.648512	0.624813
C16C8.14	0.877074	0.99968	0.775844	0.999945	0.28543	0.0239812	0.360561	0.261112	0.618226	0.747136	0.521997	0.300657	0.924538	0.948363
C16C8.16	0.872564	0.99968	0.932624	0.999945	0.176965	1.13569e-06	0.187052	0.0025765	0.550505	0.268387	0.279835	0.000732244	0.556744	0.309954
C16C8.18	1.04027	0.99968	0.523977	0.999945	0.0614517	1.19092e-12	0.116777	8.406e-05	0.651176	0.496861	0.0884176	7.37229e-09	0.148115	4.32874e-05
C16C8.20	0.878653	0.99968	1.18984	0.999945	0.218189	0.0149022	0.183063	0.0297155	0.621773	0.748488	0.307296	0.0567396	0.543242	0.57162
C16C8.22	0.490398	0.99968	0.621689	0.999945	0.0799764	9.32472e-05	0.126467	0.0288008	0.502389	0.541039	0.130495	0.00159224	0.295946	0.256643
C16C8.4	0.83104	0.99968	1.3275	0.999945	0.29321	0.000361884	0.21582	0.0093965	0.563986	0.235339	0.287293	0.000246057	0.559874	0.248815
C16C8.5	0.920875	0.99968	1.19526	0.999945	0.205504	1.6066e-06	0.171315	0.000107931	0.711567	0.639379	0.408884	0.0120265	0.628093	0.368989
C16D2.1	0.931788	0.99968	0.932513	0.999945	1.6509	0.123654	1.78674	0.270995	0.842286	0.851763	1.98064	0.0378497	2.56016	0.00552085
C16D9.1	0.557558	0.99968	1.44147	0.999945	4.02998	0.00122681	2.8086	0.105537	2.54177	0.192879	2.89175	0.00781555	1.25666	0.813988
C16D9.4	1.03944	0.99968	0.935704	0.999945	1.79926	0.107445	1.92862	0.208676	0.806982	0.82207	2.10159	0.0604802	2.84719	0.00483963
C16D9.5	0.893975	0.99968	0.56319	0.999945	0.128821	0.000910022	0.22854	0.137159	0.639357	0.7356	0.251699	0.0201823	0.430084	0.349115
C16D9.6	1.39898	0.99968	1.1163	0.999945	2.48363	0.0367587	2.26832	0.23985	1.77479	0.578916	3.08067	0.0104616	1.90577	0.249798
C16D9.9	0.998972	0.99968	1.49235	0.999945	3.66847	0.000958304	2.46311	0.104808	2.12998	0.29791	3.50355	0.00300856	1.7976	0.239445
C16E9.1	0.20919	0.195249	0.918609	0.999945	2.05185	0.28522	2.19316	0.32743	0.492481	0.537885	1.62566	0.558294	3.60454	0.0193018
C16E9.2	1.35341	0.99968	1.22849	0.999945	1.81209	0.0966486	1.47907	0.475949	1.413	0.653838	1.62435	0.240442	1.2541	0.683564
C16H3.3	1.54511	0.99968	1.37709	0.999945	1.92111	0.0426004	1.40367	0.542254	1.81304	0.204869	2.17702	0.0526916	1.30482	0.659926
C17B7.12	0.668485	0.99968	0.613629	0.999945	0.297586	0.156712	0.493809	0.479016	0.724611	0.912263	0.246392	0.148354	0.371922	0.356873
C17C3.1	0.966258	0.99968	1.25831	0.999945	3.26418	0.000495799	2.61256	0.0571363	1.04431	0.985145	2.23275	0.0771984	2.32359	0.0832228
C17D12.5	0.769186	0.99968	0.566191	0.999945	0.077782	8.20979e-07	0.13624	0.00959215	0.546231	0.49965	0.0909473	2.28315e-05	0.177223	0.0341859
C17E4.10	0.817807	0.99968	1.14579	0.999945	0.99936	0.998584	0.866422	0.822279	1.08911	0.956953	1.07894	0.879324	1.08112	0.884477
C17E4.11	0.82091	0.99968	0.988109	0.999945	0.575802	0.221011	0.58011	0.356576	0.866065	0.92635	0.776367	0.644582	0.977871	0.973642
C17E4.20	1.2492	0.99968	1.72351	0.999945	1.04483	0.950917	0.591517	0.550301	1.33697	0.8855	1.43468	0.577579	1.16843	0.875633
C17E4.4	1.27815	0.99968	1.31014	0.999945	0.704816	0.448389	0.528158	0.3725	0.866569	0.942287	0.439868	0.110054	0.551687	0.394008
C17E4.6	0.887333	0.99968	0.953141	0.999945	0.513731	0.0335346	0.533072	0.2596	0.767223	0.670113	0.554115	0.063538	0.788552	0.609942
C17E7.9	0.183617	0.134546	1.719	0.999945	0.0741256	0.000267407	0.0408155	0.00960831	0.254248	0.101212	0.329512	0.143729	1.41428	0.768945
C17F3.1	0.867439	0.99968	0.577114	0.999945	0.0570315	9.89528e-11	0.0957753	0.000779772	0.349309	0.0017851	0.0462656	7.82263e-14	0.140568	0.000109341
C17F3.3	0.995582	0.99968	0.637635	0.999945	0.081507	3.50974e-09	0.125926	0.000963015	0.458625	0.158955	0.123233	1.68144e-06	0.292859	0.0641072
C17F4.2	1.44419	0.99968	1.89099	0.999945	1.06858	0.92627	0.594085	0.673475	3.47284	0.00903226	1.27322	0.758222	0.395569	0.120954
C17F4.7	1.09206	0.99968	0.970193	0.999945	1.48062	0.351699	1.53596	0.499457	1.13499	0.881794	0.876244	0.804673	0.838373	0.766249
C17G1.2	0.980849	0.99968	1.12234	0.999945	3.37802	0.0186473	2.88681	0.304277	0.5395	0.746583	2.22146	0.281951	4.31833	0.119393
C17G1.5	1.08522	0.99968	0.757706	0.999945	1.15699	0.735867	1.56404	0.50808	1.11874	0.936925	1.86075	0.0810543	1.81497	0.094353
C17G10.1	0.898338	0.99968	0.954767	0.999945	0.299872	4.96358e-05	0.309997	0.0157767	0.714233	0.522994	0.377625	0.00168096	0.575464	0.130461
C17G10.13	0.760676	0.99968	0.916051	0.999945	0.144334	4.85125e-07	0.155639	0.000846845	0.685091	0.64723	0.235003	0.000507599	0.374817	0.0793443
C17G10.3	0.961261	0.99968	0.5443	0.999945	0.0491595	4.74326e-12	0.090142	8.36716e-05	0.566374	0.402906	0.08734	2.42257e-06	0.166624	0.0129145
C17G10.7	0.874572	0.99968	0.458924	0.93805	1.12667	0.827704	2.46572	0.13267	0.811543	0.851845	1.02638	0.964333	1.38107	0.495966
C17H11.2	1.21229	0.99968	1.82732	0.999945	1.8456	0.195051	1.01226	0.988078	2.66117	0.0774941	2.05739	0.148212	0.842748	0.804843
C17H11.6	1.1502	0.99968	1.16118	0.999945	1.88284	0.0623075	1.63094	0.375557	1.40083	0.602973	1.75894	0.108305	1.36696	0.471232
C17H12.11	0.731602	0.99968	1.0548	0.999945	3.45544	0.000317055	3.19186	0.0798452	0.548993	0.200782	2.87355	0.00550701	5.71815	4.14899e-10
C17H12.12	0.707552	0.99968	0.63111	0.999945	0.0561208	7.11637e-09	0.0868037	0.0012398	0.497817	0.31579	0.0789613	1.22435e-06	0.167806	0.0156026
C17H12.2	0.943734	0.99968	1.02438	0.999945	0.723632	0.314427	0.698592	0.533419	0.816665	0.757885	0.678143	0.230003	0.904564	0.830238
C17H12.3	0.851127	0.99968	0.684975	0.999945	0.0962586	4.33892e-09	0.1398	0.000253498	0.6771	0.557425	0.169353	1.65448e-06	0.27134	0.00125785
C17H12.37	0.745876	0.99968	1.0271	0.999945	3.42171	0.00035717	3.24517	0.0760502	0.540746	0.197366	2.85744	0.00572195	5.76399	6.94798e-10
C17H12.5	1.1246	0.99968	0.70032	0.999945	0.123564	1.22766e-05	0.172512	0.0106279	0.577681	0.503115	0.0739788	3.60796e-06	0.137139	0.00443923
C17H12.6	1.19504	0.99968	0.357995	0.350891	1.37254	0.535128	3.80606	0.0221035	0.112335	5.01244e-07	0.280761	0.00093782	2.56493	0.180987
C17H12.8	1.07613	0.99968	0.404863	0.718267	0.205803	1.52632e-05	0.519121	0.300756	0.195323	1.91743e-08	0.0613335	2.23868e-18	0.342547	0.00330907
C18A11.1	0.70024	0.99968	0.866964	0.999945	2.81372	0.00100375	3.26387	0.0109453	1.00165	0.998655	3.15324	8.60229e-05	3.42515	0.000168603
C18A11.2	0.967107	0.99968	1.40822	0.999945	2.83335	0.00375118	2.0453	0.258162	1.12203	0.953028	2.49518	0.00930872	2.41502	0.0263677
C18A11.3	0.936412	0.99968	1.03118	0.999945	0.722488	0.46239	0.721626	0.680965	1.81281	0.338199	0.731704	0.512353	0.437806	0.1065
C18A3.10	1.01161	0.99968	0.931394	0.999945	1.35628	0.383828	1.46781	0.476779	0.719401	0.601901	1.06376	0.894013	1.61244	0.227782
C18A3.3	0.860859	0.99968	0.703243	0.999945	0.286087	2.16221e-05	0.403807	0.0649833	0.636285	0.307203	0.28894	4.25274e-05	0.496117	0.0698668
C18A3.7	0.964385	0.99968	0.783163	0.999945	0.0475831	2.02874e-09	0.0601227	3.24556e-05	0.667901	0.684431	0.133894	1.3699e-05	0.224372	0.0219393
C18A3.9	1.10125	0.99968	1.06472	0.999945	0.803319	0.712259	0.759611	0.690721	0.977925	0.99433	0.728194	0.628601	0.81332	0.796303
C18B12.4	0.864945	0.99968	0.899223	0.999945	1.63272	0.186259	1.81471	0.262886	0.921574	0.958896	1.43771	0.340406	1.6971	0.184839
C18B12.6	1.08091	0.99968	0.7552	0.999945	1.00685	0.987753	1.35498	0.635228	0.861658	0.881794	0.956758	0.926041	1.20744	0.679782
C18B2.3	1.07821	0.99968	0.770954	0.999945	0.898846	0.789579	1.18266	0.796481	0.752914	0.673177	0.773972	0.512619	1.11975	0.835588
C18B2.4	1.00296	0.99968	1.38011	0.999945	4.34595	1.38365e-05	3.15468	0.0248085	1.22853	0.736477	4.70772	1.2383e-07	4.16825	5.59624e-07
C18B2.5	1.08388	0.99968	0.879994	0.999945	0.894117	0.767492	1.00975	0.988238	0.886524	0.906015	0.75298	0.479103	0.926021	0.891408
C18C4.7	1.95986	0.76778	1.05559	0.999945	1.42065	0.310621	1.36527	0.596813	1.51408	0.393591	1.8686	0.054788	1.34589	0.456737
C18D11.1	1.19155	0.99968	0.798232	0.999945	0.92169	0.842932	1.18402	0.82795	0.877679	0.892143	0.88369	0.786648	1.09686	0.853508
C18D11.3	1.13717	0.99968	1.6229	0.999945	0.924759	0.866093	0.556849	0.411137	1.2136	0.822795	0.71468	0.386665	0.64159	0.266723
C18E3.1	1.08307	0.99968	0.695215	0.999945	0.0827002	4.56349e-08	0.117928	0.000436765	0.709467	0.733038	0.130166	2.82825e-05	0.198203	0.00545185
C18E3.3	1.66318	0.99968	1.93719	0.999945	1.87051	0.104772	0.963079	0.958084	1.54892	0.608792	2.25576	0.0333258	1.58455	0.372115
C18E3.9	0.614455	0.99968	0.909827	0.999945	0.257707	1.79401e-05	0.27762	0.0261761	0.654063	0.40136	0.383107	0.00435649	0.63862	0.270686
C18E9.2	1.09581	0.99968	0.886007	0.999945	1.01386	0.97597	1.15183	0.821664	0.840089	0.835021	0.976134	0.960739	1.26364	0.568487
C18E9.4	1.09987	0.99968	1.13063	0.999945	0.930042	0.878	0.841611	0.796605	1.14215	0.906015	0.980867	0.972044	0.937681	0.899195
C18E9.5	0.86284	0.99968	0.880792	0.999945	1.15099	0.713038	1.30486	0.637702	0.882078	0.923245	0.808349	0.622132	0.992288	0.990984
C18E9.7	1.34024	0.99968	0.52737	0.999945	0.408877	0.142402	0.801186	0.849629	0.71256	0.676361	0.672199	0.496172	1.04926	0.958674
C18E9.8	0.854111	0.99968	0.630412	0.999945	0.0821296	6.80528e-12	0.128209	3.63777e-05	0.478756	0.0789594	0.084585	6.00007e-11	0.191813	2.07768e-05
C18E9.9	1.06695	0.99968	1.15746	0.999945	2.09308	0.00996739	1.81088	0.211898	1.45389	0.41872	2.33832	0.00310926	1.75427	0.0850831
C18F10.7	0.829749	0.99968	1.30674	0.999945	0.935073	0.877424	0.704131	0.593112	1.00196	0.998048	0.972711	0.95803	1.05698	0.925702
C18G1.1	1.28692	0.99968	1.90626	0.999945	2.89731	0.0223072	1.5614	0.573495	2.07639	0.419935	2.72547	0.0542499	1.42301	0.593978
C18G1.9	0.850811	0.99968	0.648031	0.999945	0.0661006	5.44887e-05	0.0988069	0.0233312	0.450288	0.42755	0.0610852	0.000314006	0.140812	0.136092
C18H2.5	1.30023	0.99968	0.759669	0.999945	0.204314	0.0116739	0.269354	0.148258	0.967524	0.991857	0.0808139	0.00201182	0.089171	0.0104524
C18H7.11	0.74671	0.99968	0.566125	0.999945	1.69647	0.215636	2.9393	0.108784	0.24863	0.00686525	1.38093	0.456197	6.04024	5.84342e-05
C18H7.4	1.33313	0.99968	0.732186	0.999945	0.120258	0.00212945	0.165261	0.0564625	0.695184	0.845854	0.263732	0.0506281	0.418807	0.392156
C18H7.7	1.1289	0.99968	0.855409	0.999945	0.0619398	2.35094e-09	0.0717298	2.61181e-05	0.773336	0.833717	0.0561219	7.68657e-08	0.0789624	9.52576e-05
C18H9.6	1.10285	0.99968	0.649651	0.999945	1.9295	0.0699791	2.98693	0.0210807	0.685844	0.605506	1.04042	0.951878	1.64298	0.365242
C23F12.4	1.52595	0.99968	1.10429	0.999945	1.70273	0.113861	1.57233	0.481628	1.27225	0.802495	1.43189	0.357721	1.22601	0.704262
C23G10.1	0.979793	0.99968	0.631501	0.999945	0.0364907	5.00837e-08	0.0575497	0.000186748	0.543718	0.49793	0.146559	0.00538397	0.289575	0.212145
C23G10.2	0.894863	0.99968	0.725421	0.999945	0.573131	0.0609257	0.790617	0.661097	0.741896	0.558006	0.517103	0.0445751	0.758234	0.510506
C23G10.7	1.08208	0.99968	0.850495	0.999945	0.42672	0.00311613	0.491119	0.237795	0.675533	0.363016	0.442878	0.00859776	0.714115	0.383929
C23G10.8	1.27356	0.99968	1.28566	0.999945	0.758147	0.489998	0.579886	0.40593	1.06877	0.971142	0.849701	0.72664	0.867359	0.822926
C23H3.2	1.10396	0.99968	1.1829	0.999945	1.52938	0.224264	1.30762	0.658541	1.32982	0.596614	1.19168	0.703151	0.97346	0.964238
C23H3.5	0.939767	0.99968	1.22441	0.999945	0.702662	0.371232	0.567693	0.349962	0.906887	0.95694	0.784256	0.591366	0.944905	0.933522
C23H3.9	2.35094	0.449767	1.9993	0.999945	1.59211	0.288305	0.820189	0.822279	2.34558	0.0305179	1.66002	0.280974	0.767565	0.525312
C23H5.8	0.636173	0.99968	1.2165	0.999945	0.529131	0.0433515	0.438715	0.0928491	0.668424	0.49988	0.473831	0.0209879	0.769401	0.643337
C24A11.1	0.902529	0.99968	0.703567	0.999945	0.164747	3.28714e-05	0.230732	0.0298187	0.517486	0.232006	0.243854	0.000348981	0.515093	0.27395
C24A3.2	1.13593	0.99968	0.869479	0.999945	1.80867	0.0386054	2.09801	0.118904	1.00244	0.997789	1.32497	0.436464	1.44109	0.356549
C24A3.4	1.20988	0.99968	2.20025	0.999945	2.62972	0.0164801	1.20913	0.78882	2.53931	0.0822103	3.73943	0.00136213	1.60065	0.38435
C24B5.4	1.22062	0.99968	1.11273	0.999945	1.8569	0.0638622	1.70274	0.406401	1.30344	0.740397	1.66142	0.215212	1.38267	0.505311
C24B9.3	0.8646	0.99968	0.696616	0.999945	0.732557	0.419156	1.05407	0.933045	0.776932	0.736314	0.594534	0.17478	0.83193	0.692186
C24D10.2	0.817906	0.99968	0.551913	0.999945	0.0591092	3.86789e-12	0.105281	0.000122704	0.468231	0.0318249	0.0854654	1.28068e-13	0.198571	8.32987e-06
C24D10.4	0.961944	0.99968	1.20109	0.999945	0.777886	0.47057	0.640715	0.435385	0.971927	0.985145	0.883843	0.759995	0.990773	0.987495
C24D10.6	0.853578	0.99968	0.980694	0.999945	0.568139	0.148446	0.580404	0.327522	0.873304	0.916297	0.497601	0.0946613	0.622881	0.322506
C24F3.2	0.827105	0.99968	1.23993	0.999945	0.636705	0.429139	0.511249	0.368172	1.00818	0.997597	0.75478	0.661112	0.814371	0.823073
C24G6.8	0.947854	0.99968	1.15119	0.999945	0.794887	0.509024	0.688141	0.478683	0.934387	0.958896	0.841347	0.652667	0.982183	0.97283
C24H10.1	0.804625	0.99968	0.647305	0.999945	0.704832	0.456063	1.10095	0.899094	0.583307	0.484215	0.53085	0.189516	0.989319	0.9901
C24H10.2	1.05913	0.99968	0.754184	0.999945	0.990077	0.980472	1.32076	0.620437	0.937696	0.968729	1.06933	0.889325	1.24991	0.687173
C24H10.3	1.49136	0.99968	0.889375	0.999945	0.250855	0.0140998	0.297367	0.335211	1.44586	0.748488	0.73222	0.680452	0.546973	0.435095
C24H11.1	0.86944	0.99968	0.697347	0.999945	0.054278	4.34983e-06	0.0765571	0.00186352	0.759771	0.864977	0.0497902	7.9065e-05	0.0695969	0.00355718
C24H11.2	0.986133	0.99968	0.744718	0.999945	0.0400614	1.07322e-05	0.0528731	0.00130852	0.65478	0.788913	0.0429137	0.000151675	0.0700912	0.0187012
C24H12.4	0.936233	0.99968	0.990336	0.999945	0.490285	0.0610982	0.488283	0.263685	0.860618	0.918913	0.537628	0.140026	0.684132	0.530025
C25A1.1	0.86139	0.99968	1.28495	0.999945	0.504123	0.0423415	0.386388	0.0880969	0.962472	0.98131	0.645979	0.253291	0.732464	0.435095
C25A1.16	0.846273	0.99968	0.804579	0.999945	0.370669	0.000608214	0.460918	0.0850639	0.734153	0.53959	0.515047	0.0571699	0.764611	0.535932
C25A11.2	1.03057	0.99968	1.20703	0.999945	1.64294	0.28798	1.33922	0.707735	1.33698	0.853747	1.40983	0.547912	1.14637	0.877954
C25A6.1	1.52977	0.99968	0.912822	0.999945	0.468103	0.285288	0.514793	0.483859	0.861968	0.968729	0.560319	0.496092	0.737658	0.834234
C25A8.5	0.756514	0.99968	0.65771	0.999945	0.0703078	2.43241e-05	0.10582	0.00979502	0.502554	0.520206	0.166121	0.00380816	0.359898	0.323032
C25B8.8	2.24009	0.406768	1.17326	0.999945	0.649531	0.388087	0.575132	0.566183	1.60141	0.4924	0.821796	0.732059	0.556618	0.187069
C25D7.1	0.913553	0.99968	0.709127	0.999945	0.0670686	3.2829e-10	0.0920444	0.000370801	0.663931	0.577699	0.0839794	3.31785e-08	0.135611	0.000251176
C25D7.10	0.89954	0.99968	1.07624	0.999945	0.971272	0.951086	0.895374	0.869013	0.864124	0.889946	1.09135	0.855834	1.379	0.400916
C25D7.15	1.25025	0.99968	1.75837	0.999945	1.9518	0.293952	1.12367	0.904809	1.2287	0.944069	1.80173	0.366434	1.59723	0.582132
C25D7.16	0.787735	0.99968	0.579107	0.999945	0.108811	0.00185763	0.186715	0.106298	0.555715	0.725381	0.103213	0.00522548	0.209187	0.213485
C25D7.5	0.879268	0.99968	0.849642	0.999945	2.13968	0.0970906	2.54078	0.155791	0.703788	0.810921	1.41324	0.565358	2.17683	0.229128
C25E10.10	0.763698	0.99968	1.37451	0.999945	2.98752	0.00427206	2.17646	0.186559	0.85702	0.947453	2.22102	0.129169	2.81654	0.0794112
C25E10.12	0.948192	0.99968	0.8442	0.999945	2.17023	0.00803416	2.60076	0.0455617	1.05012	0.97276	2.017	0.0716516	2.08501	0.0674473
C25E10.17	0.952684	0.99968	0.619975	0.999945	0.152427	0.000681925	0.242446	0.0966131	0.735998	0.847792	0.239688	0.0173158	0.356357	0.176702
C25E10.4	1.52301	0.99968	2.26144	0.999945	3.41415	0.0062183	1.57725	0.673615	1.51244	0.739445	2.87347	0.0241316	2.04597	0.141293
C25E10.5	1.07673	0.99968	0.825328	0.999945	2.9742	0.000111484	3.62067	0.00220315	0.829378	0.872373	1.715	0.104605	2.24563	0.0484702
C25E10.7	1.81439	0.99968	1.26392	0.999945	2.87501	0.0573198	2.30714	0.304277	0.740388	0.923245	1.69237	0.497028	2.46102	0.3661
C25E10.8	0.836907	0.99968	1.99216	0.999945	10.0678	5.7119e-12	5.00949	0.00102674	1.68219	0.596569	11.0851	7.11338e-08	7.17629	5.10431e-05
C25F6.1	1.15657	0.99968	1.08619	0.999945	1.46073	0.26631	1.36216	0.604786	1.16335	0.893179	1.66649	0.219806	1.56094	0.355704
C25F6.6	1.85239	0.99968	1.0404	0.999945	0.265881	0.059521	0.268501	0.320046	1.29325	0.894096	0.395877	0.217896	0.327235	0.0767514
C25F6.7	1.37927	0.99968	0.667084	0.999945	0.385327	0.183717	0.605182	0.716538	1.4216	0.675345	0.511133	0.256448	0.389872	0.0630852
C25F6.8	0.859439	0.99968	0.218924	0.591062	0.580586	0.431141	2.69634	0.367083	0.394197	0.484716	0.51905	0.377598	1.45452	0.785097
C25F9.10	1.04064	0.99968	0.56952	0.999945	1.01225	0.978747	1.7874	0.291079	0.638917	0.457423	0.92724	0.884305	1.5784	0.319876
C25F9.11	0.435838	0.650729	1.23467	0.999945	7.45074	9.79397e-07	5.87181	0.00606163	0.356029	0.0371879	6.14117	2.82825e-05	18.9297	1.00105e-27
C25F9.12	0.880851	0.99968	0.952301	0.999945	1.83993	0.359479	1.91666	0.372147	0.832031	0.957458	3.36346	0.108355	4.4463	0.0449203
C25F9.14	0.546069	0.99968	0.463438	0.999945	2.22218	0.0560552	4.82622	0.0012398	0.625325	0.672264	2.05202	0.156722	3.57674	0.00817778
C25F9.4	1.36886	0.99968	1.46474	0.999945	2.48304	0.0757889	1.70488	0.418463	1.32357	0.899013	3.01121	0.050624	2.50543	0.134066
C25F9.5	1.34197	0.99968	0.908392	0.999945	3.20844	0.0334052	3.51106	0.0651311	0.83426	0.96407	3.3175	0.0571656	4.44752	0.0455887
C25F9.6	0.867364	0.99968	0.830769	0.999945	1.35614	0.496014	1.61607	0.469086	0.703515	0.584984	1.24953	0.658596	1.93386	0.157221
C25F9.9	2.42059	0.673274	1.41905	0.999945	1.92447	0.25225	1.4205	0.728211	1.24709	0.914435	1.22611	0.797989	1.07546	0.932321
C25G4.2	0.913187	0.99968	1.1547	0.999945	1.22096	0.651556	1.05771	0.936654	1.33736	0.786711	1.67382	0.205376	1.36246	0.578034
C25G4.3	0.952515	0.99968	0.96136	0.999945	0.703272	0.440532	0.734261	0.638729	1.32309	0.798303	0.850819	0.76885	0.700453	0.534276
C25G4.8	0.933958	0.99968	0.508798	0.999945	0.055946	4.33455e-05	0.111073	0.0351623	0.904087	0.971229	0.231971	0.054788	0.278337	0.164327
C25H3.11	1.64178	0.99968	1.39228	0.999945	1.25496	0.585089	0.887136	0.873973	1.13723	0.914435	1.15757	0.746917	1.11125	0.836489
C25H3.14	1.17916	0.99968	1.22941	0.999945	1.01027	0.983019	0.817924	0.750481	1.05509	0.978937	0.92891	0.895789	0.955821	0.94818
C25H3.16	1.00544	0.99968	0.591968	0.999945	0.0972919	3.31706e-07	0.164009	0.00394922	0.712425	0.758431	0.0731607	8.21243e-07	0.110835	0.000416769
C25H3.17	0.948885	0.99968	0.876094	0.999945	0.550604	0.120003	0.625257	0.447259	0.795516	0.838856	0.471867	0.0710421	0.646325	0.461941
C25H3.3	0.770282	0.99968	0.955446	0.999945	0.565951	0.150413	0.593365	0.359362	0.790425	0.822086	0.627806	0.338953	0.868654	0.841792
C25H3.7	1.00769	0.99968	1.26255	0.999945	1.1211	0.766473	0.890893	0.849038	1.08067	0.957458	1.1315	0.767152	1.14105	0.798962
C25H3.9	0.827954	0.99968	0.988078	0.999945	0.790331	0.505072	0.809194	0.699917	0.990489	0.995532	0.801391	0.568109	0.882583	0.775421
C26B2.2	0.941033	0.99968	0.533636	0.999945	0.117843	1.60269e-06	0.21901	0.0290742	0.582978	0.520206	0.104871	3.75794e-05	0.194101	0.0378307
C26B2.7	0.902162	0.99968	0.947658	0.999945	0.602877	0.205881	0.632758	0.442434	0.90396	0.946503	0.563015	0.151916	0.679958	0.365594
C26B2.8	1.00124	0.99968	0.293769	0.999945	0.29365	0.0612862	1.04924	0.97646	0.382483	0.479585	0.340307	0.127095	1.11396	0.95799
C26B9.1	1.02838	0.99968	1.42487	0.999945	2.67882	0.00427501	1.87285	0.238573	1.4956	0.572336	2.8519	0.00303318	2.07716	0.0464023
C26B9.3	1.79984	0.99968	1.1267	0.999945	0.365859	0.0394651	0.340096	0.334456	1.60432	0.410059	0.666356	0.554222	0.453084	0.172379
C26B9.5	0.97138	0.99968	1.03842	0.999945	0.892094	0.803128	0.863771	0.823681	1.0471	0.979323	0.888376	0.802215	0.925044	0.894633
C26B9.7	1.3472	0.99968	3.23352	0.999945	0.568447	0.560694	0.185689	0.242605	2.97899	0.0514829	1.29074	0.799277	0.471189	0.388856
C26C6.9	0.871932	0.99968	0.759792	0.999945	1.00522	0.989833	1.33979	0.612859	0.780998	0.7321	0.907225	0.834484	1.26227	0.641504
C26D10.6	1.21172	0.99968	0.960632	0.999945	1.69712	0.239428	1.78517	0.343584	1.3913	0.689211	1.45825	0.453108	1.13882	0.808915
C26E1.2	1.34789	0.99968	1.35699	0.999945	1.67023	0.455832	1.2105	0.854682	1.0813	0.985145	1.8584	0.390661	1.8804	0.4621
C26E6.12	1.23451	0.99968	1.52727	0.999945	0.41077	0.133643	0.265954	0.0583521	1.11727	0.968729	0.796386	0.766967	0.773219	0.789196
C26F1.1	0.733705	0.99968	0.294786	0.117415	0.336561	0.0374589	1.15769	0.880559	0.345788	0.00287097	0.464628	0.106804	1.48427	0.578007
C26F1.14	0.85027	0.99968	0.641137	0.999945	0.842514	0.691655	1.33283	0.668112	0.693572	0.522873	0.690337	0.315557	1.08448	0.888526
C26F1.3	1.00336	0.99968	0.874163	0.999945	0.379097	0.000641953	0.431027	0.081484	0.722983	0.522873	0.382846	0.00115969	0.577011	0.115215
C26G2.2	0.371181	0.766784	0.845581	0.999945	2.22991	0.117583	2.52358	0.395839	0.140475	0.00545937	1.14513	0.860198	8.94452	0.000222446
C27A2.12	1.37722	0.99968	0.852989	0.999945	0.634735	0.468796	0.777782	0.853781	1.1376	0.959865	0.62043	0.537571	0.591542	0.523394
C27A2.5	0.611963	0.99968	0.252264	0.378008	0.325085	0.174044	1.33556	0.852481	0.361227	0.090862	0.371931	0.144805	1.15459	0.912885
C27A7.1	0.841819	0.99968	2.54174	0.768211	2.75892	0.0117398	1.0694	0.933045	2.67713	0.0198482	2.33842	0.0506741	0.953454	0.939576
C27A7.5	1.03498	0.99968	1.29872	0.999945	1.19583	0.677426	0.893856	0.902615	1.06046	0.974695	1.14712	0.784353	1.17919	0.777292
C27A7.6	0.611052	0.99968	1.23728	0.999945	1.50073	0.305812	1.18108	0.848656	0.525917	0.214321	0.874334	0.811445	1.81759	0.218627
C27A7.8	1.19909	0.99968	0.704045	0.999945	2.72015	0.0663235	3.9012	0.0364659	0.983005	0.996172	1.6118	0.48465	1.76834	0.40152
C27B7.2	0.735707	0.99968	1.00256	0.999945	0.583261	0.0917216	0.580121	0.299904	1.02346	0.988094	0.736792	0.405579	0.783704	0.584273
C27B7.5	0.677922	0.99968	0.888812	0.999945	0.154484	5.39019e-10	0.172314	0.000103778	0.791067	0.739445	0.284295	0.000130116	0.392103	0.00472325
C27B7.6	0.990196	0.99968	0.72105	0.999945	0.0951517	7.76689e-06	0.127688	0.0157238	0.43225	0.223702	0.136466	3.6611e-05	0.354296	0.236827
C27B7.7	1.31239	0.99968	1.37619	0.999945	2.14999	0.136936	1.55506	0.562302	1.65076	0.707699	1.43651	0.5791	0.948666	0.958046
C27C12.1	1.09987	0.99968	1.61878	0.999945	1.08321	0.924939	0.660144	0.647306	4.27144	0.0185408	2.58088	0.147596	0.661698	0.616191
C27C12.4	1.02934	0.99968	1.20082	0.999945	1.19804	0.652603	1.00856	0.990732	1.6892	0.250667	1.35633	0.456393	0.873771	0.804843
C27C7.1	0.664124	0.99968	1.40586	0.999945	0.311848	0.00050544	0.217477	0.00478047	2.38005	0.00691969	0.673915	0.35468	0.309089	8.4406e-05
C27D6.12	1.10185	0.99968	1.08515	0.999945	1.97511	0.154169	1.84058	0.323538	1.61215	0.592296	1.89583	0.228307	1.28844	0.676991
C27D6.3	0.853446	0.99968	0.622193	0.999945	0.0795289	2.65782e-08	0.125183	0.00318087	0.783313	0.838856	0.108886	0.000271193	0.14774	0.00814809
C27D8.1	0.790021	0.99968	0.533335	0.999945	0.0519866	3.23035e-13	0.0966477	8.11221e-05	0.436465	0.0638238	0.10049	3.33598e-08	0.26115	0.0282719
C27D8.3	1.54234	0.99968	1.06742	0.999945	1.57097	0.265342	1.49428	0.549746	0.995043	0.997789	1.34085	0.543595	1.46644	0.518822
C27D8.4	0.801006	0.99968	1.07254	0.999945	0.483174	0.144112	0.443347	0.282174	0.639087	0.728889	0.685037	0.543589	1.16584	0.884477
C27D9.1	0.586114	0.99968	1.37073	0.999945	0.114405	4.27656e-07	0.080713	0.000289093	0.354289	0.0267336	0.183973	0.000146648	0.568833	0.343961
C27D9.2	0.955898	0.99968	0.0788222	0.000582448	0.0618162	2.73535e-15	0.817069	0.870794	0.205157	3.10871e-06	0.0365554	1.10107e-11	0.207846	0.0431624
C27F2.10	1.05361	0.99968	1.08207	0.999945	0.565307	0.11476	0.517237	0.240833	0.971011	0.985651	0.556845	0.182166	0.621358	0.333206
C27F2.4	0.833199	0.99968	0.862214	0.999945	0.542809	0.0597391	0.629994	0.393112	0.80474	0.801205	0.65133	0.230527	0.882709	0.824994
C27F2.7	0.864716	0.99968	1.18997	0.999945	0.402786	0.0190122	0.330698	0.100142	0.538301	0.137403	0.392963	0.0133898	0.794511	0.683708
C27F2.9	0.99579	0.99968	0.874497	0.999945	0.618846	0.143327	0.708763	0.529986	0.762825	0.694486	0.584808	0.134704	0.833808	0.731607
C27H5.2	1.13782	0.99968	1.34948	0.999945	1.57616	0.294063	1.18311	0.814375	1.66083	0.403179	1.78638	0.18748	1.16925	0.779327
C27H5.4	1.20335	0.99968	0.414321	0.519338	0.550267	0.0982701	1.32531	0.653426	0.620436	0.419935	0.38134	0.00828141	0.667025	0.448614
C27H6.8	0.900268	0.99968	0.74639	0.999945	0.481881	0.0239769	0.645212	0.407739	0.710602	0.594347	0.565731	0.0991833	0.867713	0.805658
C27H6.9	1.12519	0.99968	1.25319	0.999945	0.624739	0.316889	0.490457	0.316177	1.4725	0.677196	1.08993	0.884187	0.806108	0.747023
C28A5.6	1.14121	0.99968	0.908972	0.999945	0.227825	0.0390155	0.247072	0.159894	1.03337	0.992996	0.168009	0.037683	0.175479	0.0871023
C28C12.1	1.07353	0.99968	0.785832	0.999945	0.135553	0.00143508	0.174376	0.0461437	0.93218	0.982057	0.222523	0.024671	0.259266	0.109671
C28C12.11	0.93865	0.99968	0.697201	0.999945	0.173917	1.50628e-05	0.244543	0.0491256	0.776729	0.817405	0.172571	3.12515e-05	0.241577	0.00604199
C28C12.12	0.907125	0.99968	1.02628	0.999945	0.286573	1.00159e-05	0.277271	0.00386417	0.678694	0.478374	0.365016	0.00315573	0.586344	0.275317
C28C12.4	0.906737	0.99968	2.91165	0.768514	3.89029	8.05323e-06	1.3775	0.682174	4.14106	1.63208e-06	3.82163	0.000139618	1.00565	0.993532
C28D4.4	0.866788	0.99968	0.582919	0.999945	0.0476518	2.92918e-06	0.0813308	0.00543067	0.39707	0.347226	0.119539	0.00572172	0.325527	0.496278
C28D4.5	0.80136	0.99968	0.481097	0.999945	0.0587546	1.31251e-11	0.119865	0.00143461	0.40874	0.0425487	0.0544985	3.82297e-11	0.143667	0.00162408
C28D4.7	0.70755	0.99968	0.563774	0.999945	0.0882164	3.20497e-06	0.151908	0.0292069	0.58939	0.544898	0.0821856	1.13556e-05	0.148242	0.00837973
C28D4.8	0.708158	0.99968	0.427362	0.999945	0.0870795	0.000112588	0.199193	0.148549	0.577754	0.634369	0.0350071	6.50497e-05	0.0634955	0.015597
C28G1.10	0.63058	0.99968	0.255688	0.583706	0.468347	0.155802	1.78764	0.595175	0.593389	0.693751	0.389414	0.1192	0.714093	0.763789
C28G1.6	1.12889	0.99968	0.838499	0.999945	1.72615	0.191135	2.09083	0.237175	0.766908	0.847365	1.53322	0.354917	2.17425	0.112779
C28H8.14	1.04289	0.99968	1.14016	0.999945	1.45401	0.279106	1.29828	0.668527	1.45061	0.396459	2.03262	0.0278571	1.53094	0.226061
C28H8.3	1.70466	0.974082	1.15508	0.999945	1.14134	0.766056	0.960335	0.960706	1.34791	0.654604	1.05381	0.92469	0.850961	0.744822
C28H8.5	1.55626	0.99968	0.464494	0.999945	0.526579	0.419836	1.17874	0.904853	0.794494	0.842275	0.995818	0.996722	1.39397	0.746378
C29A12.1	0.73106	0.99968	0.94319	0.999945	0.111336	3.18022e-09	0.11622	0.000103747	0.422982	0.084182	0.244672	0.000226522	0.639631	0.544269
C29A12.6	1.7899	0.99968	1.37539	0.999945	1.39796	0.589789	1.01772	0.986234	2.12078	0.350392	1.33495	0.665034	0.684845	0.607235
C29E4.11	1.05899	0.99968	1.04148	0.999945	1.17649	0.800344	1.15408	0.88296	1.05283	0.988006	0.94051	0.943235	0.97058	0.981638
C29E4.12	0.944155	0.99968	0.965118	0.999945	0.512392	0.0781075	0.531326	0.237548	0.952423	0.978454	0.493146	0.0686211	0.565379	0.141565
C29E4.13	0.717008	0.99968	0.770427	0.999945	0.356343	0.0199231	0.454489	0.298479	0.514261	0.31579	0.558675	0.223855	1.19478	0.830384
C29E4.14	0.891367	0.99968	0.492309	0.999945	0.138553	0.000873119	0.285099	0.212911	0.469348	0.501412	0.122131	0.00147631	0.288402	0.306359
C29E4.15	1.19894	0.99968	2.33995	0.999945	1.28723	0.653108	0.572716	0.56158	3.71417	0.000180563	1.98929	0.182166	0.584354	0.331535
C29F3.7	1.09283	0.99968	0.729951	0.999945	1.52948	0.204102	2.08696	0.118039	0.562196	0.110269	1.26789	0.539938	2.45257	0.00194136
C29F5.1	1.04673	0.99968	0.767828	0.999945	0.742169	0.44883	0.980738	0.978735	0.637509	0.39952	0.703827	0.396288	1.19979	0.713657
C29F5.3	1.25745	0.99968	0.937662	0.999945	0.27246	0.0484556	0.296152	0.196775	1.34569	0.878258	0.38141	0.228492	0.307527	0.178002
C29F7.1	0.779904	0.99968	0.691741	0.999945	0.89193	0.865089	1.28448	0.784096	0.904883	0.973677	0.76588	0.713492	0.921511	0.940416
C29F7.2	1.12359	0.99968	0.307546	0.31502	0.437784	0.0204181	1.45022	0.601794	0.451129	0.0419751	0.560634	0.259523	1.36399	0.657554
C29F7.3	0.540349	0.728489	1.06386	0.999945	1.9692	0.0776381	1.81968	0.350964	0.658123	0.433802	1.43055	0.4322	2.37511	0.00194336
C29F7.t3	0.607202	0.99968	1.11144	0.999945	0.850964	0.826099	0.761802	0.729711	1.09103	0.978516	1.13712	0.885525	1.1387	0.898068
C29F9.2	0.893267	0.99968	0.455592	0.999945	0.524495	0.307161	1.18106	0.873332	0.883446	0.956953	0.72108	0.642962	0.884676	0.858458
C29G2.6	1.19694	0.99968	1.08369	0.999945	2.62138	0.00466161	2.40015	0.103346	1.18214	0.879548	2.14504	0.0577587	1.96874	0.119109
C29H12.2	1.45476	0.99968	1.00435	0.999945	0.677231	0.195169	0.676646	0.436853	1.0012	0.998617	0.747098	0.395183	0.813897	0.616665
C29H12.6	0.957304	0.99968	0.821755	0.999945	1.44377	0.307515	1.75773	0.300118	1.00526	0.997747	1.29541	0.533326	1.40693	0.531513
C30B5.2	1.01656	0.99968	0.938992	0.999945	0.911036	0.801636	0.972856	0.964983	0.97664	0.985651	0.878054	0.731022	0.980874	0.970192
C30B5.6	2.17809	0.702477	1.96838	0.999945	0.662993	0.520149	0.351542	0.322178	2.79492	0.0163206	0.978471	0.978101	0.3781	0.0390695
C30B5.7	1.28898	0.99968	1.04506	0.999945	2.37344	0.123573	2.33601	0.342539	0.99463	0.997789	2.07785	0.188408	2.24399	0.141528
C30E1.9	1.79099	0.99968	0.779797	0.999945	2.81004	0.0552793	3.51363	0.0921981	0.921536	0.985145	1.43905	0.608438	1.71691	0.283142
C30F12.2	0.727484	0.99968	1.29206	0.999945	0.656183	0.307015	0.503884	0.234488	0.945595	0.97654	0.624172	0.275451	0.719967	0.511701
C30F12.4	0.690895	0.99968	0.933714	0.999945	0.114227	1.06522e-12	0.119173	0.000194768	0.426232	0.014929	0.209761	4.73708e-07	0.53882	0.193883
C30F12.5	0.539489	0.99968	0.651502	0.999945	1.04311	0.94405	1.60049	0.404854	0.646407	0.56318	1.4146	0.53284	2.38873	0.0124507
C30F2.3	0.344977	0.99968	0.627078	0.999945	1.25509	0.748437	2.00917	0.340081	0.593553	0.809572	1.46635	0.618355	2.69963	0.280584
C30F2.4	1.04334	0.99968	0.385964	0.999945	0.573485	0.381664	1.51413	0.669131	0.289463	0.184407	0.473026	0.306199	1.7913	0.610813
C30F8.3	1.6482	0.99968	0.492802	0.999945	0.433547	0.164963	0.919101	0.949125	1.02753	0.986462	0.546522	0.323892	0.577395	0.443575
C30G12.1	1.97766	0.99968	0.81329	0.999945	0.324278	0.160463	0.41541	0.50572	1.12855	0.971142	0.422086	0.365738	0.410978	0.443575
C30G12.2	1.05009	0.99968	2.44692	0.950446	0.995756	0.995093	0.400425	0.252963	3.46142	0.0479886	1.39586	0.693909	0.428094	0.318548
C30G12.4	3.04175	0.116653	1.63643	0.999945	0.704187	0.622438	0.452012	0.517147	3.20065	0.0120414	1.05719	0.945505	0.355564	0.0485388
C30G12.6	1.29652	0.99968	1.71385	0.999945	0.394995	0.104748	0.224092	0.0509527	1.04582	0.988006	0.38021	0.153133	0.393204	0.256978
C30G4.4	0.962861	0.99968	1.48708	0.999945	2.16456	0.00859002	1.46288	0.462423	1.50254	0.392524	2.1771	0.0108679	1.58204	0.225489
C30G7.2	0.926626	0.99968	0.88731	0.999945	1.73344	0.130588	1.97378	0.206246	1.01739	0.992599	1.22973	0.642962	1.31285	0.522549
C30G7.3	0.670213	0.99968	0.826956	0.999945	0.110358	2.39641e-06	0.131608	0.00231044	0.605107	0.610329	0.131231	0.00150972	0.235075	0.127193
C30G7.4	0.322954	0.739665	1.22264	0.999945	4.45579	0.000690737	3.46731	0.279071	0.130021	0.0225635	2.81005	0.0577587	22.3524	4.40275e-07
C30H6.5	1.16979	0.99968	0.296604	0.646224	0.261709	0.27961	0.91374	0.94841	0.555885	0.118335	0.340932	0.093189	0.671618	0.655569
C30H6.8	1.15347	0.99968	0.98948	0.999945	0.634793	0.208902	0.635714	0.43281	0.938121	0.969712	0.543316	0.106645	0.628783	0.305479
C30H6.9	0.792106	0.99968	1.02607	0.999945	0.600723	0.178728	0.582136	0.345444	1.06921	0.968729	0.616503	0.240203	0.629377	0.292645
C31B8.7	1.08586	0.99968	0.64852	0.999945	1.39558	0.48738	2.16919	0.189317	1.00215	0.998617	1.37678	0.545761	1.49628	0.432697
C31C9.2	1.52782	0.99968	0.995829	0.999945	1.0183	0.96863	1.05581	0.955392	1.37185	0.583167	0.902964	0.83908	0.714937	0.392427
C31C9.6	0.734027	0.99968	0.919285	0.999945	1.40776	0.553795	1.51319	0.618101	0.91856	0.98131	1.54347	0.487031	1.8278	0.439375
C31C9.7	0.914281	0.99968	0.615852	0.999945	0.895872	0.792817	1.47632	0.469297	0.784994	0.727371	1.31578	0.52705	1.83275	0.0794876
C31H1.1	1.152	0.99968	0.651068	0.999945	0.0780297	6.22646e-07	0.119737	0.00079118	0.72433	0.774057	0.0978653	6.7215e-06	0.145795	0.000205835
C31H1.2	1.06086	0.99968	0.715925	0.999945	0.176429	0.000103359	0.243333	0.0372882	0.951576	0.984307	0.280516	0.0084424	0.32051	0.0480638
C31H1.5	0.789679	0.99968	0.636107	0.999945	0.066282	2.57924e-07	0.10106	0.00519519	0.526542	0.398629	0.0482687	3.54493e-06	0.0981333	0.00789578
C31H1.8	0.928829	0.99968	1.30136	0.999945	0.155762	4.67461e-08	0.117014	0.000120532	0.560772	0.216329	0.251133	0.000485883	0.489381	0.123977
C31H2.14	0.705305	0.99968	1.19011	0.999945	2.99904	0.00372833	2.44236	0.273578	0.404078	0.301009	2.59575	0.026376	7.05163	7.44427e-05
C31H5.4	1.02604	0.99968	1.30656	0.999945	2.6643	0.00184071	2.02629	0.173243	1.39679	0.614949	2.57815	0.00450434	2.01603	0.0397114
C31H5.5	1.02166	0.99968	0.835572	0.999945	1.65343	0.237162	2.00232	0.275802	1.11387	0.95565	1.12581	0.824061	1.09857	0.888526
C31H5.6	0.628218	0.99968	0.927137	0.999945	0.957868	0.934953	1.02997	0.969679	0.909247	0.965999	1.04186	0.944418	1.24753	0.750758
C32D5.10	0.975067	0.99968	1.15073	0.999945	0.634787	0.22432	0.54446	0.283934	0.969452	0.985651	0.656214	0.303056	0.735662	0.50308
C32D5.11	0.857388	0.99968	1.54476	0.999945	0.862623	0.761677	0.550471	0.34519	1.18608	0.887164	1.26031	0.643071	1.16077	0.769781
C32D5.12	2.10892	0.749937	2.32838	0.999945	2.86314	0.0485709	1.28746	0.843688	3.34715	0.00239415	3.49255	0.0037414	1.13302	0.855266
C32D5.4	1.47883	0.99968	0.94303	0.999945	0.126903	0.00356338	0.133621	0.027011	1.03346	0.992636	0.151219	0.0207875	0.152512	0.0579454
C32D5.6	0.742248	0.99968	1.6724	0.999945	2.46801	0.0105613	1.43904	0.639589	0.747009	0.81009	1.25728	0.644582	1.83541	0.230776
C32D5.7	1.23918	0.99968	1.38473	0.999945	2.17069	0.0623837	1.58613	0.424934	1.72365	0.42755	2.84875	0.0147765	1.80835	0.181556
C32D5.8	0.957019	0.99968	0.993145	0.999945	1.35297	0.326744	1.37066	0.53973	1.00517	0.99728	1.31643	0.443472	1.42626	0.32566
C32E12.1	0.916258	0.99968	0.59439	0.999945	0.0605419	2.45675e-09	0.0995819	0.000950532	0.47248	0.192216	0.0597613	4.79412e-08	0.134137	0.00432404
C32E12.4	1.21924	0.99968	1.17312	0.999945	1.46203	0.418692	1.25175	0.743612	1.23766	0.893045	1.3165	0.695459	1.1515	0.882556
C32E8.4	0.667177	0.99968	0.596069	0.999945	0.0451321	1.63291e-20	0.0738651	6.16529e-06	0.408794	0.00259789	0.0719333	3.38446e-16	0.189987	1.84713e-05
C32E8.5	0.90604	0.99968	1.15725	0.999945	0.423968	0.00725698	0.359886	0.0674564	0.808594	0.810921	0.491121	0.046377	0.659819	0.361229
C32E8.9	1.16915	0.99968	1.06814	0.999945	1.52267	0.40023	1.41672	0.598796	1.03426	0.989684	0.964628	0.964035	1.01156	0.990576
C32F10.4	0.78667	0.99968	1.56516	0.999945	3.87245	1.18646e-05	2.42192	0.16415	1.29622	0.766752	4.50877	7.03737e-07	3.79749	3.24883e-06
C32F10.8	0.941583	0.99968	1.20818	0.999945	1.21361	0.577746	0.997094	0.996984	1.041	0.977219	1.05606	0.909917	1.10362	0.854118
C32H11.11	1.72295	0.99968	0.917316	0.999945	0.295476	0.0736173	0.338124	0.398844	0.857784	0.953028	0.632639	0.592195	0.830492	0.888526
C32H11.3	0.902043	0.99968	0.097528	0.0216811	0.497107	0.158287	5.25352	0.0820922	0.120482	0.00336974	0.300169	0.033959	2.89161	0.390162
C32H11.4	1.0441	0.99968	0.0445632	0.000147958	0.600928	0.316098	13.8373	5.35471e-05	0.125339	3.34193e-07	0.359847	0.0402673	3.09817	0.0079943
C32H11.5	1.78293	0.99968	1.15555	0.999945	0.427991	0.193068	0.390054	0.470706	1.3328	0.838856	0.695063	0.618433	0.575061	0.492831
C32H11.6	1.59616	0.99968	1.05079	0.999945	0.250975	0.132035	0.251409	0.352969	1.03633	0.993876	0.70003	0.787823	0.754137	0.876557
C32H11.8	1.72295	0.99968	0.917316	0.999945	0.295476	0.0736173	0.338124	0.398844	0.857784	0.953028	0.629393	0.59089	0.82657	0.886769
C32H11.9	0.645883	0.99968	0.0173144	0.372671	0.138945	0.335879	7.81602	3.363e-05	0.0192749	0.125289	0.0168068	0.0329939	0.971877	0.980504
C33A11.2	0.771898	0.99968	1.29094	0.999945	2.77306	0.00785213	2.12867	0.189034	1.46216	0.668614	2.44155	0.0345544	1.81931	0.15119
C33A12.1	0.899857	0.99968	0.868957	0.999945	0.720885	0.379762	0.838977	0.789607	0.843579	0.831327	0.540755	0.0474029	0.697769	0.340254
C33A12.19	0.456546	0.99968	3.02287	0.962049	7.21984	6.96368e-06	2.32733	0.265194	0.99027	0.997476	4.1534	0.00397884	4.68027	0.000320046
C33A12.3	0.907056	0.99968	0.867622	0.999945	0.841724	0.621336	0.968235	0.959078	0.789468	0.683011	0.807705	0.603369	1.11672	0.836367
C33A12.4	0.939819	0.99968	0.903762	0.999945	2.76872	0.0293646	3.13989	0.145658	1.10569	0.974695	1.40218	0.660569	1.36885	0.757238
C33B4.2	2.32165	0.99968	3.77898	0.999945	0.521978	0.563717	0.144237	0.114872	3.2147	0.231238	0.748614	0.815774	0.249176	0.0493422
C33B4.4	0.836538	0.99968	0.824396	0.999945	1.06516	0.876373	1.2907	0.645038	0.648901	0.418219	0.86165	0.713396	1.44895	0.41546
C33C12.10	1.19291	0.99968	1.1538	0.999945	1.11768	0.787773	0.972755	0.967386	1.24275	0.795545	1.0701	0.887986	0.938208	0.912791
C33C12.4	1.07525	0.99968	0.51647	0.999945	0.444401	0.0817936	0.846568	0.849038	0.638845	0.51146	0.563301	0.171352	0.958281	0.951307
C33C12.7	0.877003	0.99968	0.828929	0.999945	0.0456372	7.15881e-05	0.0551691	0.00101425	0.924477	0.980794	0.129833	0.00707618	0.151755	0.0185948
C33D9.3	0.799652	0.99968	1.03417	0.999945	1.23213	0.573915	1.22498	0.789219	1.28347	0.75392	1.71415	0.108839	1.45741	0.398557
C33D9.8	0.82901	0.99968	0.743447	0.999945	1.61237	0.404677	2.23093	0.380222	1.86654	0.596569	1.56711	0.537571	0.907837	0.927055
C33F10.1	0.82864	0.99968	0.697651	0.999945	0.0587984	1.31169e-14	0.081821	0.000165309	0.633553	0.426142	0.0805299	1.43525e-09	0.137403	2.30161e-05
C33F10.11	0.979005	0.99968	0.754221	0.999945	0.0627348	1.00164e-08	0.0803997	0.00111629	0.522314	0.241115	0.102544	7.80388e-08	0.213289	0.00744994
C33F10.12	1.03109	0.99968	0.577921	0.999945	0.0751852	6.26306e-06	0.126202	0.0164925	0.730955	0.769291	0.103431	2.65929e-06	0.15361	0.000355239
C33F10.14	0.754998	0.99968	1.37368	0.999945	1.36073	0.422581	0.984065	0.98228	1.18569	0.876226	1.64661	0.202452	1.51403	0.326483
C33F10.8	1.05076	0.99968	0.711275	0.999945	0.127023	0.000177151	0.179056	0.0244646	0.756723	0.867714	0.0948733	0.000521705	0.139066	0.0208284
C33G3.4	1.35861	0.99968	0.799935	0.999945	0.532276	0.18525	0.670913	0.54981	0.926429	0.972262	0.431774	0.103238	0.504416	0.190905
C33G3.6	1.39626	0.99968	1.1623	0.999945	1.19935	0.792173	1.03226	0.973377	0.835931	0.957458	1.19783	0.820066	1.55632	0.652345
C33G8.2	0.55515	0.99968	0.990482	0.999945	2.37371	0.0772723	2.32941	0.310672	0.404788	0.235822	2.35043	0.0948098	6.34059	2.10059e-06
C33G8.4	1.13219	0.99968	0.753605	0.999945	1.74239	0.0905369	2.34369	0.111446	0.937199	0.968729	1.11016	0.813181	1.28816	0.598992
C33H5.13	0.831037	0.99968	0.910325	0.999945	1.90034	0.0612824	2.07092	0.167446	0.670588	0.467684	1.78764	0.145424	2.91228	0.00167954
C33H5.16	1.00655	0.99968	0.702738	0.999945	0.0753544	1.62671e-11	0.106864	3.43765e-05	0.862947	0.906015	0.110318	1.16529e-08	0.139057	3.92343e-06
C34B2.11	1.38325	0.99968	1.62814	0.999945	1.71756	0.186601	1.08216	0.927638	1.60042	0.576829	1.70749	0.232437	1.16033	0.826725
C34B2.3	1.13808	0.99968	0.546737	0.999945	0.10325	0.00543502	0.187135	0.186163	0.955552	0.989684	0.415391	0.30171	0.477302	0.505625
C34B2.4	0.846447	0.99968	0.669407	0.999945	0.0827704	9.81429e-05	0.122896	0.02037	0.65266	0.789707	0.272265	0.0275104	0.468608	0.461765
C34B2.8	0.994578	0.99968	0.867455	0.999945	0.855369	0.644534	0.996793	0.996705	0.977823	0.985651	0.754283	0.396152	0.840056	0.67037
C34B2.9	1.57033	0.99968	0.558544	0.999945	0.576786	0.261923	1.06936	0.952223	0.670817	0.617886	1.00553	0.993776	1.64064	0.433794
C34B4.2	0.872554	0.99968	1.03393	0.999945	0.855781	0.701738	0.825622	0.756428	0.812017	0.809572	0.651476	0.303456	0.876004	0.836367
C34B4.3	0.758826	0.99968	0.577663	0.999945	0.836899	0.743268	1.43911	0.62597	0.540934	0.491778	0.693573	0.498889	1.40062	0.673386
C34B4.4	0.875883	0.99968	1.03431	0.999945	0.866675	0.723777	0.836075	0.771696	0.804726	0.798727	0.665612	0.33749	0.903264	0.88178
C34B7.1	0.666036	0.99968	0.640386	0.999945	1.38002	0.45581	2.13101	0.243379	0.524534	0.620726	1.20059	0.738587	2.53898	0.310693
C34C12.2	1.02074	0.99968	1.229	0.999945	0.642013	0.410273	0.519343	0.355407	0.740881	0.875311	0.789238	0.7323	1.16245	0.894704
C34C12.4	0.971274	0.99968	0.854394	0.999945	1.77093	0.145608	2.07211	0.153458	0.822451	0.819305	1.9607	0.0872789	2.60285	0.00105461
C34C12.6	2.02121	0.395547	1.75266	0.999945	1.25369	0.672809	0.747221	0.789219	3.26744	3.15071e-05	1.74222	0.199568	0.580878	0.230985
C34C12.7	0.911363	0.99968	0.87156	0.999945	1.23822	0.671958	1.42445	0.578109	0.57377	0.298786	0.942883	0.927361	1.79494	0.249923
C34C12.8	0.938889	0.99968	0.875886	0.999945	0.547471	0.0602309	0.627154	0.383312	0.834247	0.795545	0.517756	0.0211142	0.676246	0.252605
C34C12.9	1.09651	0.99968	1.02338	0.999945	1.9805	0.0619906	1.93547	0.2322	0.65236	0.642843	1.27018	0.583869	2.10348	0.175296
C34C6.3	1.83989	0.99968	0.815072	0.999945	0.536433	0.318097	0.690907	0.76729	1.354	0.827406	0.943605	0.945112	0.762143	0.758962
C34C6.4	1.12208	0.99968	0.749015	0.999945	0.585257	0.344337	0.773867	0.775274	0.673521	0.808518	0.61433	0.504274	0.982474	0.989929
C34D1.4	1.25315	0.99968	1.86219	0.999945	2.50407	0.0231263	1.37833	0.678608	1.04583	0.985651	2.2849	0.0608905	2.37789	0.0816135
C34D10.1	0.9853	0.99968	1.24068	0.999945	1.95129	0.0295002	1.58477	0.389539	1.23921	0.798727	1.85686	0.0511449	1.63478	0.207514
C34D4.10	0.789249	0.99968	1.11947	0.999945	0.166503	0.00995251	0.147296	0.0266093	0.738322	0.898907	0.377915	0.218139	0.549805	0.630376
C34D4.2	0.912468	0.99968	0.720154	0.999945	0.083446	9.82444e-10	0.117547	0.000348971	0.939417	0.973577	0.209213	0.00145835	0.244137	0.0114205
C34D4.3	0.641947	0.99968	0.602546	0.999945	0.0503516	4.93365e-18	0.0811472	4.77744e-05	0.422939	0.00861326	0.0737161	5.76136e-15	0.18859	7.30646e-05
C34D4.4	1.00401	0.99968	0.987478	0.999945	0.799105	0.501204	0.810913	0.698384	0.885541	0.883568	0.867888	0.700812	1.06755	0.889233
C34E10.10	0.802034	0.99968	0.70138	0.999945	0.29298	6.46992e-05	0.413889	0.0908759	0.611273	0.302019	0.280477	7.36043e-05	0.500242	0.0990443
C34E11.2	0.977436	0.99968	0.290347	0.61798	0.630869	0.538931	2.24535	0.467153	0.604611	0.636791	0.618689	0.394604	1.1268	0.902451
C34E11.4	0.881715	0.99968	0.403183	0.999945	1.02787	0.967577	2.55571	0.264818	0.674702	0.842275	0.806161	0.785561	1.27851	0.834674
C34E7.3	1.2042	0.99968	0.445866	0.999945	0.660219	0.368536	1.50679	0.591075	0.779716	0.85476	0.678231	0.464046	0.943565	0.944753
C34E7.4	1.44171	0.99968	0.737894	0.999945	0.505624	0.0696633	0.70932	0.698045	0.856046	0.862731	0.482915	0.0510556	0.614475	0.215842
C34F11.2	0.951074	0.99968	0.5581	0.999945	0.0801411	3.55719e-10	0.140535	0.00275093	0.55863	0.286427	0.122129	3.44448e-07	0.235485	0.00842238
C34F11.5	1.12509	0.99968	0.80885	0.999945	0.123421	7.88741e-06	0.149481	0.00860901	0.605288	0.591797	0.104576	3.30656e-05	0.189958	0.0273288
C34F11.8	0.291529	0.542219	2.66733	0.999945	10.6583	1.07388e-09	3.90751	0.0261264	1.53909	0.725804	6.89279	3.47984e-05	4.8737	0.000147705
C34F6.1	1.89408	0.9771	2.40563	0.999945	0.941821	0.934713	0.407373	0.371798	4.11623	8.56432e-06	1.33466	0.649618	0.352251	0.0267346
C34F6.10	1.59782	0.99968	1.20063	0.999945	1.56308	0.316713	1.29535	0.654791	1.60768	0.466414	1.22873	0.704963	0.830776	0.730117
C34F6.11	1.17354	0.99968	1.17507	0.999945	1.50484	0.408107	1.28957	0.708707	1.1258	0.960129	1.89414	0.198494	1.84032	0.272668
C34F6.5	0.94371	0.99968	0.682682	0.999945	0.979546	0.964652	1.42945	0.549133	0.951548	0.979023	1.068	0.90072	1.22451	0.703634
C34F6.7	1.06276	0.99968	0.776641	0.999945	1.24337	0.6057	1.60655	0.408117	1.04167	0.98347	1.24758	0.609372	1.30137	0.598992
C34F6.9	1.05349	0.99968	1.07075	0.999945	1.36906	0.429967	1.29056	0.686588	1.54933	0.47445	1.54079	0.273391	1.08247	0.89609
C34G6.3	0.791273	0.99968	0.5039	0.999945	0.0909347	0.000859389	0.177554	0.14955	0.674451	0.815926	0.129164	0.00357511	0.208178	0.114982
C34H4.1	0.556799	0.99968	0.597249	0.999945	3.23522	0.00781534	5.36707	0.00541553	0.247169	0.0538656	3.48759	0.00136695	15.6612	5.58961e-09
C34H4.2	0.668013	0.99968	0.701148	0.999945	1.32381	0.52443	1.86524	0.298031	0.380934	0.00544992	1.84802	0.141931	5.29195	1.20465e-09
C34H4.5	0.98869	0.99968	1.3715	0.999945	0.711737	0.422613	0.514968	0.261112	1.19268	0.880798	0.713741	0.502797	0.653105	0.435962
C35A11.2	1.2935	0.99968	1.91411	0.999945	0.665045	0.469912	0.3607	0.270874	3.38672	3.59417e-05	1.42749	0.503763	0.45889	0.0824906
C35A11.4	0.933678	0.99968	1.14216	0.999945	1.08888	0.886912	0.944458	0.935368	1.05573	0.982914	0.837305	0.78265	0.862728	0.826054
C35A5.10	0.763263	0.99968	0.337576	0.999945	0.516547	0.259629	1.5933	0.674119	0.366161	0.0599068	0.634058	0.451325	1.96535	0.433448
C35A5.11	2.04574	0.694519	0.779079	0.999945	0.185187	0.00168066	0.249071	0.195997	1.34751	0.78701	0.320817	0.167584	0.260846	0.117894
C35A5.3	1.4494	0.99968	0.776682	0.999945	0.796317	0.692531	1.02426	0.975454	0.616737	0.647493	0.534647	0.36065	0.927119	0.941953
C35A5.4	1.54101	0.99968	0.798552	0.999945	0.0916992	3.71385e-06	0.116213	0.00139087	0.966967	0.989375	0.179153	0.00489807	0.202092	0.0168165
C35A5.8	1.18306	0.99968	1.18804	0.999945	0.659046	0.220617	0.544485	0.309477	0.99149	0.996172	0.647056	0.217361	0.710149	0.382714
C35B1.2	1.03975	0.99968	1.31846	0.999945	1.43024	0.425195	1.07546	0.920476	1.08576	0.971142	1.21371	0.732314	1.21958	0.777721
C35B1.4	0.55016	0.99968	1.29977	0.999945	4.54329	2.7583e-05	3.34372	0.212334	0.182168	0.00115034	2.80288	0.0406141	16.9031	1.08039e-08
C35B1.5	0.91842	0.99968	0.619765	0.999945	0.938049	0.880715	1.52904	0.445113	0.708145	0.48767	0.866902	0.737621	1.33112	0.466596
C35B1.7	1.45815	0.99968	0.670659	0.999945	1.18968	0.744597	1.80737	0.357321	1.0791	0.973363	1.38571	0.551182	1.40573	0.53877
C35B8.3	0.753967	0.99968	1.05643	0.999945	2.67607	0.00411009	2.5354	0.0719733	1.15071	0.932221	1.91611	0.122609	1.81189	0.232006
C35C5.10	1.11909	0.99968	0.710661	0.999945	1.06196	0.882107	1.51241	0.464929	0.848013	0.837046	0.986725	0.975151	1.26776	0.569808
C35C5.8	1.35357	0.99968	0.879584	0.999945	2.7674	0.0740852	3.2334	0.185862	0.849451	0.900534	1.80999	0.134413	2.31138	0.039308
C35C5.9	0.448096	0.954396	1.14528	0.999945	2.69929	0.0512702	2.30375	0.257073	0.49678	0.318238	2.02068	0.22082	4.4114	8.44444e-06
C35D10.1	1.08229	0.99968	1.04463	0.999945	0.841661	0.61365	0.804658	0.687309	0.975269	0.985651	0.78772	0.496491	0.88007	0.780615
C35D10.10	0.939232	0.99968	0.946095	0.999945	0.734349	0.342845	0.769916	0.643986	0.727995	0.533783	0.639276	0.1822	0.956082	0.932778
C35D10.17	1.04971	0.99968	1.40372	0.999945	1.49036	0.290589	1.06097	0.925171	1.21351	0.85094	1.53299	0.291092	1.3789	0.459752
C35D10.5	0.91354	0.99968	0.976254	0.999945	0.64451	0.162681	0.657151	0.415195	0.848608	0.843716	0.544241	0.072177	0.696904	0.379911
C35D10.6	0.909715	0.99968	1.00839	0.999945	0.636557	0.15416	0.630094	0.37413	0.94815	0.968729	0.799117	0.543256	0.918352	0.864506
C35D10.7	0.76537	0.99968	1.20753	0.999945	0.483635	0.0873065	0.392972	0.164676	1.04488	0.984365	0.671476	0.434772	0.701695	0.522405
C35D10.8	1.10888	0.99968	0.87481	0.999945	0.212257	0.00151091	0.24318	0.0367613	0.626842	0.723037	0.207665	0.00473736	0.367228	0.287493
C35E7.10	0.937206	0.99968	0.681611	0.999945	0.0645212	1.13585e-09	0.0940372	4.61646e-05	0.636241	0.557432	0.0722796	3.08329e-08	0.122816	7.74123e-05
C35E7.11	1.25779	0.99968	0.833787	0.999945	2.02794	0.187213	2.50289	0.30779	1.1731	0.958977	1.74681	0.384238	1.61366	0.543665
C35E7.2	1.03161	0.99968	0.899058	0.999945	1.58255	0.387991	1.77458	0.418757	0.961589	0.989684	1.56883	0.447398	1.76176	0.423793
C35E7.4	1.13469	0.99968	0.863516	0.999945	1.70817	0.363103	1.98876	0.387533	0.970818	0.99459	2.18631	0.180448	2.44529	0.208198
C35E7.8	0.812341	0.99968	1.07443	0.999945	0.475998	0.0247902	0.438042	0.139656	0.776108	0.73868	0.417366	0.0102309	0.58609	0.192042
C35E7.9	0.959493	0.99968	0.641741	0.999945	0.0819047	9.59107e-10	0.125325	0.000967677	0.666376	0.557425	0.141498	4.1639e-07	0.231826	0.00239025
C36A4.4	0.933889	0.99968	1.20962	0.999945	0.574303	0.114764	0.46692	0.205583	0.786257	0.766614	0.592555	0.160831	0.822691	0.693969
C36B1.11	0.960533	0.99968	1.16853	0.999945	0.265246	2.07474e-05	0.221427	0.0115343	0.711718	0.593121	0.326854	0.00152538	0.499505	0.119514
C36B1.13	0.514102	0.99968	0.607883	0.999945	1.57788	0.548984	2.55634	0.278221	0.543911	0.75392	1.01656	0.988201	2.0899	0.398923
C36B1.14	0.820714	0.99968	0.996242	0.999945	0.478191	0.0622351	0.474048	0.201832	0.776901	0.776893	0.537476	0.14952	0.75543	0.510506
C36B1.6	0.629186	0.99968	0.782317	0.999945	1.71777	0.266165	2.21441	0.154011	0.781541	0.876226	1.10619	0.897724	1.54114	0.553153
C36B7.6	1.23298	0.99968	1.11814	0.999945	1.6915	0.134495	1.51842	0.43259	1.25549	0.772444	1.70618	0.138792	1.47727	0.280395
C36C5.12	1.05143	0.99968	3.02866	0.999945	4.1161	0.00352266	1.39359	0.678574	1.8709	0.43203	2.81006	0.0611418	1.61634	0.283397
C36C5.5	0.988142	0.99968	1.64655	0.999945	1.51908	0.303915	0.937975	0.930514	1.24116	0.81836	1.0464	0.935008	0.915243	0.864958
C36C9.10	0.693869	0.99968	0.773097	0.999945	0.097412	0.000514607	0.121401	0.0333017	0.570016	0.670169	0.232245	0.0223395	0.451297	0.442836
C36E6.2	1.6813	0.99968	1.24892	0.999945	2.45034	0.00546411	1.99969	0.260398	1.74843	0.260063	2.25006	0.046358	1.39766	0.518822
C36E6.8	1.23458	0.99968	0.584859	0.999945	0.544445	0.295826	0.960146	0.971704	0.470732	0.0217106	0.549714	0.281388	1.27447	0.732917
C36E8.1	1.06726	0.99968	1.17705	0.999945	1.04261	0.919628	0.881177	0.836913	1.05712	0.968729	1.46267	0.277366	1.51066	0.228014
C36F7.5	0.721345	0.99968	0.568183	0.999945	0.0642696	0.00046573	0.110584	0.0583414	0.728074	0.884193	0.16786	0.0222896	0.24932	0.189506
C36H8.1	1.0302	0.99968	0.539915	0.999945	0.062749	2.89875e-08	0.115387	0.00104118	0.555341	0.44846	0.12702	3.74357e-05	0.24846	0.0266202
C37A2.6	0.962663	0.99968	0.779342	0.999945	0.50996	0.254867	0.65438	0.617134	1.00784	0.997747	0.70543	0.620477	0.762171	0.773349
C37A2.7	0.864114	0.99968	0.942997	0.999945	0.889113	0.730645	0.952304	0.936984	1.11078	0.908078	0.83763	0.607065	0.822043	0.61275
C37A2.8	1.05462	0.99968	1.04766	0.999945	0.604167	0.208433	0.569516	0.381764	1.08735	0.966824	0.601677	0.247049	0.599228	0.351482
C37A2.9	0.977277	0.99968	0.77845	0.999945	1.0398	0.936756	1.36233	0.667001	1.19589	0.898007	1.38453	0.481202	1.26736	0.706734
C37A5.11	0.928535	0.99968	1.13647	0.999945	2.38402	0.0533279	2.11796	0.263118	0.833643	0.952253	1.64677	0.408342	2.15246	0.374348
C37A5.7	0.837083	0.99968	2.00217	0.999945	0.727658	0.601092	0.356695	0.171749	1.61076	0.688731	1.20643	0.770468	0.81326	0.822584
C37C3.1	0.883952	0.99968	0.881074	0.999945	0.487893	0.237271	0.549243	0.493692	0.871061	0.962977	0.477512	0.27012	0.600711	0.608341
C37C3.11	1.07745	0.99968	0.864629	0.999945	1.44707	0.480975	1.72003	0.536065	1.1333	0.964665	1.31279	0.665917	1.25889	0.792171
C37C3.12	0.827819	0.99968	1.06623	0.999945	4.4021	7.58055e-05	4.10884	0.00737664	1.33856	0.848274	3.16964	0.00451426	2.56693	0.0447023
C37C3.2	1.31642	0.99968	1.07197	0.999945	1.38703	0.312355	1.29084	0.640668	1.36553	0.48404	1.37089	0.39988	1.09651	0.859593
C37C3.7	0.69883	0.99968	1.04598	0.999945	2.32225	0.0738766	2.18557	0.287423	0.676345	0.847503	1.97809	0.22144	3.20558	0.0678341
C37C3.9	0.798881	0.99968	1.05302	0.999945	0.174847	6.3385e-07	0.160881	0.00712594	0.47162	0.107791	0.232882	0.000565331	0.536945	0.337573
C37E2.2	1.48807	0.99968	2.77835	0.999945	1.13706	0.844676	0.43072	0.490686	4.4616	0.000382434	2.57355	0.0756694	0.623569	0.384742
C37H5.13	1.22831	0.99968	1.1783	0.999945	1.44434	0.345237	1.24006	0.73857	1.06019	0.977106	1.44687	0.479312	1.4865	0.502798
C37H5.14	1.10686	0.99968	0.886516	0.999945	1.46216	0.368448	1.67907	0.435385	0.942378	0.977106	0.96546	0.950585	1.11383	0.871437
C37H5.5	0.997588	0.99968	0.992344	0.999945	0.391247	0.0123695	0.388694	0.127736	0.765379	0.779652	0.488837	0.0692875	0.692857	0.514092
C38C10.3	1.11467	0.99968	0.675839	0.999945	0.103335	4.18736e-06	0.154223	0.00745343	0.648018	0.683985	0.201116	0.00199098	0.334921	0.131482
C38C3.3	0.888341	0.99968	0.566144	0.999945	0.127237	0.0017778	0.221016	0.14644	0.665282	0.818779	0.187249	0.0192147	0.305096	0.248453
C38C6.3	2.26734	0.99968	1.60884	0.999945	0.288467	0.0789414	0.187168	0.124889	2.11503	0.416163	0.938694	0.955461	0.478207	0.402086
C38D4.10	0.71983	0.99968	1.23598	0.999945	0.327514	0.00040577	0.265168	0.00158214	0.771716	0.722084	0.469762	0.0344172	0.664728	0.341214
C38D4.4	0.977281	0.99968	1.3006	0.999945	0.208118	9.06252e-08	0.157417	0.000107477	0.815921	0.801265	0.310078	0.000173632	0.412956	0.0124315
C38D4.7	0.920271	0.99968	0.892344	0.999945	0.191888	0.00417111	0.21689	0.0556141	1.49088	0.699267	0.39344	0.107161	0.287455	0.0317244
C38H2.2	1.61699	0.99968	1.18873	0.999945	2.14347	0.00895579	1.81808	0.238807	1.43638	0.438032	2.28056	0.00545681	1.7314	0.100754
C38H2.3	0.887348	0.99968	1.49222	0.999945	3.14311	0.00148383	2.09138	0.185071	1.30647	0.818779	3.16275	0.00256602	2.63979	0.0077716
C39B10.7	1.03279	0.99968	0.780762	0.999945	1.11724	0.869102	1.45207	0.671298	0.803029	0.932883	0.706123	0.625125	0.958626	0.972398
C39B5.5	0.596427	0.99968	0.546069	0.999945	0.649036	0.502473	1.16954	0.87492	0.347651	0.00840366	0.715938	0.642975	2.26761	0.161927
C39D10.11	1.15309	0.99968	0.762549	0.999945	1.70875	0.275875	2.25409	0.191611	0.920443	0.97491	1.38857	0.59441	1.6392	0.452721
C39D10.2	0.957093	0.99968	1.32156	0.999945	2.473	0.013318	1.90984	0.281269	1.39464	0.703994	1.92235	0.130383	1.50507	0.394752
C39D10.5	0.660123	0.99968	0.796231	0.999945	1.67578	0.332357	2.15505	0.373161	1.2016	0.944616	1.39581	0.660569	1.25769	0.825356
C39D10.7	0.909524	0.99968	3.41978	0.999945	5.53246	2.36328e-06	1.534	0.73234	0.432349	0.166512	4.38363	0.00889699	11.0124	2.00889e-05
C39D10.8	0.519526	0.99968	1.17661	0.999945	1.78584	0.195221	1.5058	0.514148	0.858601	0.927252	1.30008	0.635708	1.65104	0.283142
C39E9.12	0.954502	0.99968	1.32503	0.999945	0.284025	0.00678728	0.211025	0.012441	1.0043	0.997789	0.539095	0.24456	0.591412	0.447681
C39E9.7	0.721663	0.99968	1.16895	0.999945	2.42363	0.0607026	2.08056	0.250927	1.23217	0.93338	2.4512	0.0734574	2.14456	0.212016
C39E9.8	0.775833	0.99968	1.36699	0.999945	3.8322	0.000338946	2.79172	0.0280476	0.939034	0.973577	3.5227	0.00364811	4.09264	0.000348913
C39F7.1	0.619554	0.99968	0.963573	0.999945	0.918627	0.885605	0.945287	0.947186	1.32484	0.883422	0.547587	0.331728	0.434919	0.342908
C39H7.1	1.03163	0.99968	0.671364	0.999945	0.0573065	4.71736e-17	0.0845038	3.73037e-06	0.467251	0.0341798	0.101038	5.08137e-13	0.238034	0.000627791
C39H7.4	0.769413	0.99968	0.733086	0.999945	1.07248	0.877388	1.47196	0.511181	0.927854	0.959865	1.40068	0.415114	1.64414	0.241847
C40C9.3	0.967804	0.99968	0.567053	0.999945	0.714013	0.662459	1.26234	0.844608	0.415036	0.5763	0.722663	0.691547	1.92952	0.598376
C40H1.7	0.485929	0.99968	2.50613	0.804848	3.72732	0.00130832	1.50805	0.55156	1.50972	0.727661	2.11755	0.213751	1.53009	0.587571
C40H1.8	0.95894	0.99968	0.630069	0.999945	0.750766	0.727188	1.20761	0.825722	0.689923	0.872373	0.718903	0.736446	1.1409	0.914325
C41A3.2	1.28319	0.99968	1.52977	0.999945	2.50091	0.0389378	1.61964	0.479016	1.07704	0.98131	1.43091	0.605666	1.43932	0.67869
C41D11.3	1.31929	0.99968	1.94977	0.999945	1.12844	0.820674	0.580281	0.298233	1.75353	0.31653	1.37581	0.547597	0.856712	0.769985
C41D11.9	0.772178	0.99968	1.09642	0.999945	0.518138	0.0469624	0.465937	0.188545	0.665786	0.410694	0.65289	0.253568	1.06677	0.911782
C41G7.6	1.06198	0.99968	0.800223	0.999945	0.131284	2.69482e-06	0.16132	0.00490039	0.598788	0.530294	0.109277	4.76696e-06	0.200576	0.0167286
C41G7.9	1.13098	0.99968	1.0716	0.999945	0.981643	0.961478	0.92663	0.904506	1.1096	0.917669	0.909431	0.807628	0.892479	0.802403
C42C1.12	0.882102	0.99968	0.997959	0.999945	0.584143	0.12762	0.579493	0.359362	0.735939	0.711282	0.491076	0.0579566	0.729266	0.588117
C42C1.13	0.828735	0.99968	1.34991	0.999945	0.652308	0.315989	0.47892	0.219319	1.14437	0.933714	0.854508	0.764712	0.813947	0.743978
C42C1.19	0.88319	0.99968	1.02262	0.999945	0.926753	0.871043	0.899856	0.876629	0.864748	0.899091	0.854591	0.734873	1.07876	0.891408
C42C1.3	0.758802	0.99968	0.606061	0.999945	0.151642	0.00118455	0.25101	0.132623	0.833992	0.940372	0.300417	0.0418208	0.384282	0.257606
C42C1.8	0.713769	0.99968	1.09851	0.999945	0.141954	6.13607e-07	0.126575	0.000588268	0.468216	0.183556	0.132956	3.61685e-05	0.306195	0.114982
C42C1.9	0.625689	0.99968	0.723134	0.999945	0.122118	1.38485e-05	0.166728	0.00979502	0.544964	0.513002	0.161275	0.000465281	0.330436	0.16972
C42D4.1	0.854911	0.99968	0.756399	0.999945	2.34622	0.0188509	3.10655	0.0105603	1.00919	0.996172	1.29517	0.678307	1.40093	0.601497
C42D4.13	1.69028	0.99968	1.04609	0.999945	0.361643	0.0769852	0.360148	0.331808	1.31293	0.845854	0.659703	0.640695	0.542277	0.466291
C42D4.18	0.483859	0.99968	0.800936	0.999945	2.64278	0.0146276	3.252	0.0641876	1.70125	0.580588	3.37568	0.00235602	2.16104	0.100325
C42D4.3	0.619723	0.99968	0.360084	0.571328	0.843805	0.793014	2.30648	0.298237	0.264246	6.14826e-05	0.86559	0.806453	3.59724	0.0016628
C42D8.1	0.854943	0.99968	0.871332	0.999945	1.51584	0.237526	1.74222	0.279937	0.808241	0.819827	1.5093	0.290211	2.03728	0.0539772
C43E11.12	1.22417	0.99968	1.54245	0.999945	0.699949	0.430353	0.447453	0.204918	0.954869	0.984513	0.721152	0.516291	0.823425	0.788951
C43E11.5	0.877196	0.99968	0.62163	0.999945	0.107921	1.17749e-08	0.17324	0.00079118	0.644138	0.519927	0.105927	8.76866e-08	0.179175	0.000235838
C43E11.9	0.993	0.99968	0.678407	0.999945	0.263489	1.95153e-06	0.389497	0.0341497	0.71437	0.520206	0.301876	0.000260501	0.462475	0.0514639
C43F9.11	1.68612	0.99968	0.235439	0.820044	0.64296	0.585761	2.86497	0.43259	0.873249	0.95971	0.714933	0.678387	0.898715	0.929958
C43F9.5	0.634206	0.99968	0.855596	0.999945	1.32282	0.608799	1.53145	0.559885	0.853008	0.95121	1.60051	0.395234	2.03224	0.238262
C43G2.3	0.613584	0.99968	0.685907	0.999945	0.0413209	4.30818e-05	0.0593601	0.00865029	0.598982	0.731843	0.109487	0.00256716	0.198073	0.15901
C43H6.4	1.6332	0.99968	1.34606	0.999945	1.78366	0.181763	1.34992	0.681257	1.618	0.581665	1.44952	0.481682	0.972883	0.971386
C44B11.4	0.922237	0.99968	0.944454	0.999945	2.31433	0.00910414	2.48293	0.0816662	0.992106	0.99724	2.58852	0.00364666	2.83753	0.0034264
C44B11.6	1.63007	0.99968	1.61736	0.999945	3.58256	0.00179715	2.25211	0.228551	1.57115	0.558006	2.46533	0.0178051	1.70059	0.311401
C44B12.6	1.37885	0.99968	0.810981	0.999945	1.19124	0.800255	1.48173	0.644055	0.984688	0.996172	0.625285	0.453108	0.691351	0.645096
C44B7.11	0.998673	0.99968	0.768326	0.999945	0.858633	0.750643	1.11363	0.884	0.803295	0.868136	0.471042	0.0861288	0.633769	0.471525
C44B7.5	0.353037	0.222178	2.36507	0.999945	8.04693	1.33495e-06	3.23913	0.331314	0.238664	0.000745635	5.67307	0.00509273	25.6716	6.94833e-10
C44B7.7	1.18597	0.99968	1.03576	0.999945	1.1635	0.697641	1.14863	0.852322	0.989275	0.996172	0.993995	0.990653	1.09482	0.873886
C44B9.2	0.94241	0.99968	0.855689	0.999945	0.130209	0.00417111	0.153915	0.0497007	0.802661	0.937765	0.21913	0.0484915	0.299018	0.25284
C44B9.3	0.573895	0.99968	0.955798	0.999945	0.0970422	7.67489e-10	0.0994602	7.46973e-05	0.384178	0.0282723	0.142634	7.32124e-06	0.40529	0.148393
C44C1.1	0.908199	0.99968	1.04826	0.999945	1.71265	0.0758414	1.65833	0.373134	1.11768	0.920873	1.63408	0.198046	1.59158	0.267613
C44C1.6	0.966376	0.99968	2.31158	0.789405	10.7177	3.47253e-08	4.60737	0.0131783	1.44698	0.795545	6.13726	2.31127e-07	4.57284	0.00125858
C44C10.11	1.01117	0.99968	0.856222	0.999945	0.879353	0.789324	1.05149	0.955362	1.44013	0.620726	1.37861	0.455781	1.04322	0.94784
C44C10.9	0.774397	0.99968	0.644248	0.999945	1.00827	0.982333	1.57217	0.364234	0.58597	0.0982722	1.02497	0.953299	1.90558	0.0358241
C44E4.5	1.02931	0.99968	1.40915	0.999945	0.665693	0.278302	0.46662	0.188131	0.962637	0.984799	0.879381	0.8023	0.994632	0.994206
C44F1.1	1.49988	0.99968	0.544203	0.999945	0.991297	0.986798	1.83415	0.330316	0.859875	0.931566	0.959037	0.945787	1.21493	0.775727
C44H4.4	1.4568	0.99968	1.02541	0.999945	1.47199	0.289743	1.4194	0.576284	0.945636	0.975857	1.50101	0.283503	1.72842	0.191485
C44H9.5	0.852567	0.99968	1.12752	0.999945	3.12936	0.00798314	2.79389	0.0947527	1.1396	0.968729	2.17564	0.142949	2.09474	0.274557
C44H9.6	1.49915	0.99968	1.93306	0.999945	3.28715	0.00728168	1.70326	0.408949	1.48675	0.799594	3.2631	0.00954469	2.38677	0.0901001
C45B11.5	0.905351	0.99968	0.699684	0.999945	0.147762	0.000601168	0.206547	0.0603902	0.561731	0.597981	0.163691	0.00316934	0.313897	0.213171
C45B11.8	0.856792	0.99968	0.432404	0.950802	0.232203	0.000107798	0.524572	0.419309	0.319362	0.00766776	0.220573	0.000110168	0.747704	0.731106
C45B11.9	1.07757	0.99968	1.17161	0.999945	0.302155	0.00749286	0.249614	0.0942819	0.732705	0.81677	0.230763	0.0169891	0.342856	0.21399
C45B2.1	0.159458	0.00739134	2.5614	0.999945	4.48588	0.00596775	1.67058	0.712634	0.151716	4.71265e-05	3.45853	0.0276663	24.847	1.07995e-18
C45B2.2	1.25753	0.99968	1.91487	0.999945	2.02094	0.249746	1.05752	0.957272	1.33454	0.71709	1.08616	0.902761	0.889709	0.879834
C45B2.6	1.39545	0.99968	1.50999	0.999945	2.12517	0.0793782	1.4151	0.582221	2.01104	0.310799	2.35422	0.0564845	1.28008	0.687593
C45B2.8	0.744272	0.99968	0.796121	0.999945	1.36594	0.621449	1.69297	0.546015	1.09251	0.978414	0.668179	0.51426	0.661623	0.701351
C45E1.4	0.778726	0.99968	1.25332	0.999945	3.08306	0.000496669	2.48648	0.0768673	0.934048	0.968729	2.07763	0.024282	2.42759	0.0210746
C45E5.1	1.21054	0.99968	2.12914	0.99743	1.84324	0.0617982	0.877932	0.845018	2.54986	0.00132318	1.44709	0.327332	0.617365	0.15969
C45E5.4	0.326249	0.76778	1.40017	0.999945	3.79711	0.00550187	2.67893	0.113825	1.33345	0.888056	3.91975	0.0159439	3.18487	0.0510528
C45G3.3	1.16972	0.99968	0.952258	0.999945	0.66938	0.283687	0.702448	0.521281	0.87999	0.920873	0.532346	0.123262	0.65805	0.380266
C45G9.12	0.504594	0.99968	1.54141	0.999945	2.35738	0.0625081	1.51027	0.565708	1.14522	0.937389	2.15352	0.106804	2.05474	0.0851004
C45G9.15	1.22366	0.99968	0.511365	0.999945	0.0741331	0.00237978	0.146087	0.123716	0.812137	0.949068	0.26323	0.114997	0.349779	0.322479
C45G9.2	0.913401	0.99968	1.05731	0.999945	0.375967	0.00534504	0.351008	0.0664746	0.762778	0.786503	0.463895	0.0483831	0.66493	0.485281
C45G9.4	0.899517	0.99968	0.689813	0.999945	0.0583826	2.08766e-15	0.0832504	2.83426e-06	0.587585	0.236623	0.106334	6.3538e-12	0.197268	7.24957e-06
C45G9.5	0.928112	0.99968	0.767396	0.999945	0.664009	0.209671	0.85906	0.803517	0.790268	0.735092	0.600743	0.126236	0.827073	0.679156
C45G9.6	0.871105	0.99968	2.35389	0.795162	10.3545	5.98311e-10	4.37741	0.00296939	1.30761	0.776893	5.36439	0.000479539	4.46161	0.000740847
C45G9.9	0.806432	0.99968	0.747595	0.999945	0.0507144	5.50703e-23	0.0663483	1.39476e-07	0.524864	0.0741845	0.0949351	2.98801e-13	0.196758	7.08254e-06
C46A5.6	0.855151	0.99968	1.0611	0.999945	0.33043	0.000355932	0.309599	0.0133045	0.877175	0.905417	0.38534	0.00315444	0.478422	0.0476667
C46C11.3	1.05965	0.99968	0.902127	0.999945	1.10756	0.838151	1.24952	0.764177	1.00985	0.997056	1.30789	0.583456	1.41184	0.583739
C46C2.2	0.808397	0.99968	1.25308	0.999945	2.11121	0.0166304	1.69036	0.300474	1.42858	0.493958	2.04688	0.0404349	1.56017	0.263488
C46C2.5	0.112348	0.03448	1.15367	0.999945	3.47592	0.0402173	2.87998	0.381077	0.0827632	0.00229346	4.70216	0.0317306	61.0414	2.34377e-11
C46C2.7	1.20041	0.99968	1.0093	0.999945	0.671922	0.426723	0.668116	0.523788	0.71201	0.801678	0.56998	0.30976	0.883469	0.895169
C46E10.1	0.801796	0.99968	0.77647	0.999945	0.0611975	1.42017e-12	0.0769262	3.46132e-05	0.606989	0.393872	0.0946412	4.56592e-09	0.170823	6.13913e-05
C46F11.4	1.03881	0.99968	1.49809	0.999945	1.00473	0.992908	0.660611	0.566136	1.04125	0.985651	1.04093	0.947661	1.089	0.907875
C46F11.5	0.881185	0.99968	1.2098	0.999945	1.14554	0.771471	0.929632	0.9286	1.03667	0.985651	1.34524	0.521334	1.41326	0.524442
C46F11.6	0.7131	0.99968	0.919228	0.999945	1.3076	0.49253	1.43491	0.499161	1.0973	0.953028	1.45394	0.346701	1.44582	0.380844
C46F2.1	1.17529	0.99968	1.14533	0.999945	1.58709	0.242507	1.38538	0.585333	1.76367	0.134635	1.38655	0.397191	0.855106	0.728497
C46G7.1	0.874259	0.99968	1.0051	0.999945	1.08107	0.85989	1.08032	0.900184	0.98678	0.992996	0.772739	0.544695	0.856065	0.752012
C46G7.2	0.996959	0.99968	0.924112	0.999945	1.14577	0.751733	1.25295	0.717122	0.885998	0.906015	0.977291	0.96362	1.1985	0.670133
C46H11.10	0.939749	0.99968	1.03839	0.999945	2.00175	0.0829922	1.94737	0.281321	0.893247	0.96407	1.27136	0.661269	1.54545	0.519186
C46H11.2	0.791103	0.99968	0.325881	0.795162	0.873944	0.825945	2.6785	0.221905	0.416421	0.415923	0.742957	0.659067	1.95617	0.469501
C46H11.6	1.07114	0.99968	0.58118	0.999945	0.163604	0.0010681	0.277175	0.158429	0.514224	0.539229	0.130147	0.0108076	0.261175	0.304355
C46H11.7	1.35797	0.99968	0.435398	0.999945	0.228217	0.0240362	0.549045	0.655362	0.497944	0.325261	0.380409	0.16395	0.860431	0.902735
C46H3.2	1.61515	0.99968	1.70767	0.999945	1.51589	0.491651	0.896591	0.894626	1.53906	0.769574	1.64823	0.451693	1.15833	0.872714
C47A4.3	0.739737	0.99968	0.754839	0.999945	0.062882	1.8516e-09	0.081888	0.000164677	0.741436	0.785266	0.0691555	1.87152e-06	0.100071	0.000719026
C47A4.5	0.861619	0.99968	0.530159	0.999945	0.0805659	4.40067e-07	0.149811	0.0129411	0.481475	0.394448	0.147556	0.000376984	0.356387	0.28251
C47B2.2	0.872177	0.99968	0.958293	0.999945	0.490755	0.0150961	0.511746	0.162565	0.802916	0.729596	0.570898	0.0718767	0.773946	0.517045
C47B2.9	0.919789	0.99968	0.954439	0.999945	0.87454	0.765892	0.921744	0.902758	1.03854	0.985651	1.00854	0.988042	1.06083	0.932778
C47D12.2	1.16422	0.99968	1.21638	0.999945	0.896365	0.798861	0.729151	0.611398	0.937396	0.971142	0.78748	0.600116	0.915482	0.895604
C47D12.5	0.682279	0.99968	1.17127	0.999945	3.69943	8.51387e-05	3.09126	0.0684082	0.530787	0.245427	2.32036	0.0406135	4.7596	0.000121854
C47D2.1	0.683926	0.99968	1.24747	0.999945	2.5241	0.0377869	2.04004	0.201284	1.59031	0.674208	2.93791	0.0183628	2.0005	0.17945
C47E12.10	0.666006	0.99968	0.527256	0.999945	0.0552285	4.4502e-09	0.105031	0.0012398	0.77261	0.839227	0.149723	5.59479e-05	0.213989	0.0104976
C47E12.11	0.868641	0.99968	0.556152	0.999945	0.112271	0.000144685	0.196162	0.0956824	0.383852	0.292147	0.0556279	6.20453e-05	0.160617	0.154207
C47E12.12	1.33827	0.99968	1.15682	0.999945	0.261492	0.0229984	0.223845	0.0567563	0.765167	0.853265	0.308072	0.0461213	0.437005	0.318827
C47E12.2	0.850688	0.99968	1.1554	0.999945	0.629851	0.169144	0.535851	0.310566	0.630154	0.371124	0.641138	0.240442	1.10977	0.868583
C47E12.3	1.01296	0.99968	1.14959	0.999945	1.30672	0.480438	1.12985	0.852481	1.08748	0.957458	1.09348	0.854914	1.08817	0.898068
C47E8.11	1.1731	0.99968	0.760868	0.999945	0.115919	7.03961e-07	0.15074	0.00200941	0.567608	0.44846	0.23182	0.0011672	0.448023	0.22855
C47E8.4	0.890089	0.99968	1.13088	0.999945	0.638894	0.171172	0.557236	0.32009	0.754817	0.634189	0.821309	0.656399	1.18892	0.750519
C47G2.3	0.978795	0.99968	1.08371	0.999945	0.714708	0.301322	0.65972	0.419309	1.06833	0.961314	0.756076	0.436056	0.771246	0.542889
C47G2.4	0.982977	0.99968	1.67793	0.999945	0.831804	0.726059	0.483066	0.349564	0.991105	0.997476	1.06505	0.920728	1.17117	0.831141
C48A7.9	0.622348	0.99968	1.03763	0.999945	0.826527	0.749395	0.790394	0.772355	0.982536	0.996172	0.71273	0.604374	0.772573	0.833964
C48B4.10	0.920664	0.99968	0.906983	0.999945	0.128683	1.12751e-12	0.14282	7.56793e-06	0.788884	0.722774	0.188205	1.67522e-08	0.259771	2.71247e-05
C48B4.11	0.720048	0.99968	0.927448	0.999945	0.149333	3.78666e-09	0.158947	0.000151611	0.666963	0.466782	0.163606	6.65238e-07	0.267282	0.000441551
C48B4.13	1.15702	0.99968	0.482614	0.999945	0.451989	0.126293	0.953115	0.962069	0.748569	0.851763	0.575231	0.340943	0.836487	0.839561
C48B4.6	0.894567	0.99968	0.994494	0.999945	0.287407	7.27409e-06	0.284307	0.0109041	0.891275	0.90789	0.30166	2.46879e-05	0.368321	0.000678481
C48B4.7	0.702901	0.99968	1.00957	0.999945	0.205929	2.41167e-06	0.201536	0.000858948	0.80199	0.800795	0.312159	0.00125227	0.425296	0.00792484
C48B4.8	0.871563	0.99968	1.10951	0.999945	1.08405	0.842636	0.968141	0.962637	0.894204	0.923245	0.996758	0.994825	1.21526	0.668927
C48B4.9	0.572244	0.742398	0.733761	0.999945	0.148744	4.63604e-10	0.197265	0.00767464	0.765003	0.660404	0.192599	4.47803e-05	0.274451	0.00334473
C48B6.10	1.04267	0.99968	0.621309	0.999945	0.75491	0.460898	1.23638	0.755328	0.741346	0.613865	0.617949	0.182807	0.907264	0.8371
C48B6.2	0.877377	0.99968	0.87994	0.999945	0.487123	0.0441002	0.550716	0.29078	0.792058	0.766992	0.502957	0.0556285	0.693892	0.397747
C48B6.3	0.813931	0.99968	0.885129	0.999945	0.527303	0.0691501	0.593244	0.363834	0.539067	0.134351	0.589128	0.174557	1.18856	0.776102
C48B6.9	0.913753	0.99968	0.796113	0.999945	0.626089	0.422974	0.790714	0.790489	0.647465	0.775465	0.58542	0.405793	0.979446	0.98643
C48D1.9	1.30054	0.99968	0.667456	0.999945	0.0547726	3.15526e-06	0.0822612	0.00176233	0.745219	0.853747	0.137875	0.00310613	0.207607	0.0632973
C48D5.3	1.29234	0.99968	1.86757	0.999945	0.512827	0.238788	0.289088	0.285925	2.52771	0.0964875	0.936485	0.936332	0.404675	0.141431
C48E7.1	0.62964	0.99968	1.4808	0.999945	2.49018	0.0156283	1.69036	0.300075	1.81765	0.157673	2.1104	0.0747936	1.27121	0.587296
C48E7.6	1.27199	0.99968	1.20759	0.999945	1.77961	0.244798	1.48625	0.588352	0.930317	0.983078	1.24979	0.773588	1.47718	0.687168
C48E7.7	0.726522	0.99968	0.82176	0.999945	0.0811458	2.98112e-15	0.0956552	0.000190971	0.548001	0.0998576	0.113123	6.40047e-10	0.225285	2.28681e-05
C49A1.10	0.908935	0.99968	0.871496	0.999945	1.56332	0.214209	1.79973	0.281598	0.993768	0.997476	1.38924	0.443109	1.52333	0.387032
C49A9.10	0.722269	0.99968	1.05171	0.999945	0.561409	0.251616	0.526604	0.398844	0.787456	0.881794	0.474091	0.174786	0.654996	0.598376
C49A9.2	0.799231	0.99968	0.627146	0.999945	0.755754	0.62534	1.22835	0.805696	0.598597	0.635261	1.01084	0.988801	1.84224	0.349115
C49A9.3	1.22818	0.99968	1.36835	0.999945	2.5752	0.0213753	1.90968	0.331822	1.18606	0.932991	1.81952	0.194224	1.66989	0.373346
C49A9.4	0.878845	0.99968	1.15123	0.999945	1.38524	0.495382	1.21532	0.791919	0.778052	0.890995	1.28554	0.659465	1.80284	0.377255
C49A9.5	0.869283	0.99968	0.489381	0.999945	1.16943	0.803866	2.43735	0.181313	0.775266	0.899091	0.942451	0.940021	1.33104	0.74142
C49A9.6	1.08887	0.99968	1.24877	0.999945	2.00261	0.113295	1.59761	0.431395	1.06427	0.979318	2.51706	0.0356058	2.57973	0.0131626
C49A9.9	0.798394	0.99968	0.882715	0.999945	2.1562	0.0963217	2.42413	0.136114	0.960902	0.988006	1.88656	0.225996	2.16526	0.106903
C49C3.10	1.2058	0.99968	0.763602	0.999945	1.23349	0.712226	1.66672	0.592001	0.602573	0.731476	1.30553	0.666072	2.34859	0.211871
C49C3.20	1.06668	0.99968	0.813481	0.999945	0.0814669	5.26387e-09	0.0966655	0.00152504	0.56064	0.376507	0.072644	1.70835e-06	0.137822	0.00788324
C49C3.4	1.40158	0.99968	1.78933	0.999945	2.18249	0.0139495	1.18946	0.83102	1.48987	0.541039	1.80086	0.102775	1.31252	0.620346
C49C3.6	0.851424	0.99968	1.01252	0.999945	0.364479	0.00105519	0.353115	0.0778332	0.717376	0.597371	0.471148	0.0252373	0.718021	0.494864
C49C3.7	1.14923	0.99968	1.25508	0.999945	0.424707	0.0108806	0.331951	0.047176	0.879788	0.916004	0.347589	0.00250579	0.429453	0.0273288
C49C3.9	1.14803	0.99968	1.53107	0.999945	2.71407	0.00130922	1.74735	0.359362	0.617202	0.447072	2.3481	0.00837243	4.13951	2.30161e-05
C49C8.5	1.04435	0.99968	1.17636	0.999945	1.73503	0.151603	1.47896	0.447005	1.16135	0.90789	1.81475	0.135851	1.70962	0.191506
C49F5.7	0.235442	0.0534475	1.59303	0.999945	3.10561	0.0272302	1.87859	0.525911	0.288757	0.447637	1.94364	0.266222	7.01774	1.8141e-06
C49F8.1	1.16171	0.99968	0.371125	0.999945	0.420934	0.242353	1.19241	0.904506	0.410475	0.0458482	0.522492	0.463651	1.4379	0.770242
C49F8.3	1.46996	0.99968	0.541663	0.999945	0.372891	0.0310535	0.717195	0.760157	0.758324	0.657637	0.421904	0.0856093	0.607555	0.379911
C49G7.10	0.868685	0.99968	0.94644	0.999945	5.51525	3.31428e-05	5.81275	4.3437e-05	0.736604	0.783337	3.7674	0.00276901	5.6305	9.67677e-08
C49G7.3	1.07227	0.99968	1.31246	0.999945	2.98327	0.000658456	2.32243	0.149029	1.80816	0.334377	2.94945	0.000950232	1.78144	0.290908
C49G9.2	1.03475	0.99968	1.48443	0.999945	2.27347	0.0539307	1.55495	0.525119	0.989269	0.997022	1.80564	0.210658	1.99201	0.208423
C49H3.16	2.42048	0.616419	0.872105	0.999945	0.728257	0.709796	0.879472	0.934464	1.72151	0.467684	1.01238	0.989733	0.634143	0.612972
C49H3.3	0.661582	0.99968	0.807937	0.999945	0.365864	0.00122453	0.449809	0.132345	0.82001	0.753978	0.502425	0.0168637	0.668216	0.236228
C49H3.4	1.15515	0.99968	1.05158	0.999945	0.784533	0.674401	0.744074	0.706106	0.817963	0.926123	0.666358	0.511705	0.886771	0.907441
C49H3.6	0.739815	0.99968	1.15644	0.999945	0.418027	0.00513232	0.355814	0.0586254	0.732782	0.635261	0.473379	0.0261618	0.704687	0.46579
C49H3.9	0.981817	0.99968	0.874666	0.999945	0.471732	0.0204803	0.53786	0.246234	0.675658	0.507058	0.629004	0.182488	1.02053	0.977817
C50A2.3	1.19232	0.99968	5.15943	0.0995824	1.74561	0.394477	0.340355	0.0355575	3.00506	0.0968112	2.49209	0.154117	0.90736	0.894633
C50B6.3	0.867435	0.99968	1.36206	0.999945	0.36068	0.00320214	0.257075	0.0487005	0.66487	0.465509	0.518462	0.0813888	0.851139	0.754294
C50B6.7	1.36859	0.99968	0.230151	0.219462	0.4329	0.12018	1.89424	0.299436	0.694114	0.785407	0.586403	0.390661	0.928489	0.928695
C50B6.9	1.66368	0.99968	0.904436	0.999945	0.481771	0.295082	0.548485	0.5889	1.41769	0.853416	0.675166	0.647702	0.51456	0.461821
C50B8.4	1.60958	0.99968	1.24756	0.999945	1.45718	0.435118	1.17427	0.826903	1.61866	0.50355	1.61922	0.424735	1.08674	0.924474
C50B8.5	1.06359	0.99968	1.38378	0.999945	2.03877	0.0515983	1.48129	0.500147	1.17484	0.911919	1.80268	0.135837	1.67375	0.2628
C50B8.6	0.875533	0.99968	0.831776	0.999945	1.29149	0.585089	1.55347	0.488443	0.753134	0.651328	1.12301	0.797515	1.62808	0.176807
C50C3.1	0.868092	0.99968	0.833486	0.999945	0.188553	1.68885e-07	0.222759	0.00406934	0.545803	0.116199	0.171594	1.52348e-07	0.341998	0.0105771
C50C3.5	0.712055	0.99968	0.809819	0.999945	1.9988	0.0511511	2.50473	0.105494	0.894471	0.954004	1.47106	0.353839	1.79189	0.253599
C50D2.1	2.20584	0.702477	1.68645	0.999945	0.550918	0.354282	0.343406	0.362766	3.1342	0.0168672	0.936713	0.940581	0.32091	0.0658164
C50D2.10	1.12727	0.99968	1.04209	0.999945	0.577733	0.246001	0.551031	0.383887	1.0131	0.996172	0.600659	0.324737	0.647906	0.555889
C50D2.2	1.27739	0.99968	0.657274	0.999945	0.587502	0.207681	0.924643	0.939121	0.982467	0.993264	0.882202	0.834617	0.986329	0.987852
C50D2.3	0.941326	0.99968	0.520824	0.999945	0.0871414	0.000697853	0.166473	0.122075	0.509657	0.636809	0.196398	0.0262653	0.413496	0.495346
C50D2.5	0.83989	0.99968	0.823885	0.999945	0.53188	0.0357437	0.644539	0.391767	0.884323	0.890816	0.583442	0.108698	0.717673	0.392156
C50D2.6	1.28769	0.99968	5.42458	0.000540152	26.1675	1.11599e-33	4.83066	5.77293e-05	3.86021	0.000183809	20.0062	4.38776e-17	5.61173	4.32436e-06
C50D2.7	0.980489	0.99968	1.5749	0.999945	2.07928	0.0214512	1.30475	0.669945	1.52676	0.327208	2.00765	0.0458799	1.43199	0.382208
C50D2.8	0.748875	0.99968	0.824245	0.999945	0.450969	0.133493	0.539808	0.433391	0.99227	0.997476	0.653753	0.48227	0.720351	0.633213
C50D2.9	0.870916	0.99968	0.8877	0.999945	0.630125	0.242793	0.713106	0.59014	0.948428	0.978844	0.644041	0.340943	0.737547	0.613739
C50E10.1	0.895764	0.99968	0.564406	0.999945	0.0790785	2.17915e-12	0.136839	0.00176233	0.407413	0.0293961	0.106062	4.20092e-09	0.283934	0.02083
C50E10.2	1.12468	0.99968	0.542641	0.999945	0.128936	0.0035072	0.237843	0.187007	0.82192	0.944616	0.146991	0.0265937	0.201894	0.144344
C50E3.5	0.782199	0.99968	0.992904	0.999945	0.367724	0.0367746	0.360621	0.210442	0.586026	0.574363	0.471918	0.155796	0.87572	0.889654
C50F2.2	1.54337	0.99968	2.05087	0.999945	0.834616	0.799811	0.394366	0.326056	1.33759	0.884452	1.00677	0.993776	0.815382	0.840678
C50F2.4	0.757078	0.99968	0.742804	0.999945	1.47411	0.42305	2.00389	0.317602	0.826209	0.937099	0.740571	0.651124	0.951747	0.965988
C50F2.5	1.0655	0.99968	0.69791	0.999945	0.0972361	2.49488e-08	0.139136	0.000338636	0.819799	0.87985	0.132234	5.37365e-06	0.177149	0.000658431
C50F2.7	0.737896	0.99968	1.10373	0.999945	1.83741	0.173312	1.68291	0.445375	1.43067	0.792265	2.05152	0.123707	1.56342	0.474383
C50F4.1	0.558097	0.99968	0.842466	0.999945	1.83333	0.233138	2.13382	0.325938	0.48832	0.41641	1.45621	0.52999	3.24515	0.0246811
C50F4.10	0.976589	0.99968	0.444251	0.999945	0.137729	4.90887e-05	0.306399	0.178274	0.517294	0.450873	0.172048	0.00117488	0.369129	0.251037
C50F4.12	0.769928	0.99968	0.862844	0.999945	0.292855	0.0239986	0.341748	0.172397	0.707887	0.829476	0.513277	0.273739	0.776247	0.806951
C50F4.16	0.991321	0.99968	1.19793	0.999945	0.988412	0.978313	0.818362	0.746762	1.00829	0.996172	0.999581	0.99954	1.07887	0.890663
C50F4.4	0.719579	0.99968	0.855779	0.999945	0.398802	0.0536119	0.458635	0.322765	1.10632	0.96609	0.59364	0.351978	0.579898	0.428223
C50F4.6	1.16379	0.99968	1.17692	0.999945	1.50916	0.245212	1.30153	0.648251	2.16409	0.0107459	1.59155	0.191229	0.803595	0.598451
C50F4.8	0.528849	0.53657	0.428596	0.475912	0.810866	0.567047	1.87599	0.259116	0.312829	0.00259634	0.864211	0.738888	3.0435	0.0194135
C50F7.3	1.11095	0.99968	0.560909	0.999945	0.0543112	1.86761e-07	0.0944343	0.00438162	0.602767	0.596614	0.0778124	8.57946e-06	0.139075	0.00881676
C51E3.10	1.05272	0.99968	0.643862	0.999945	1.88093	0.234334	2.8946	0.139075	0.38145	0.0993774	0.814824	0.720993	2.33333	0.123474
C51E3.6	0.868659	0.99968	1.06658	0.999945	1.78982	0.0842923	1.68232	0.33686	0.872838	0.922439	1.37353	0.433792	1.71335	0.225778
C51E3.9	0.974313	0.99968	0.806212	0.999945	1.31222	0.466472	1.64326	0.373161	0.797468	0.800795	1.12688	0.788956	1.53703	0.288361
C52B11.5	1.0028	0.99968	1.9732	0.923579	2.97378	0.00028952	1.50579	0.431102	1.27595	0.748488	2.82714	0.00453712	2.40113	0.0230045
C52B9.4	1.30489	0.99968	1.22431	0.999945	1.96534	0.0258282	1.60768	0.356865	1.32853	0.680178	2.00718	0.0349654	1.64488	0.195016
C52D10.3	1.90165	0.657913	0.954463	0.999945	0.312076	0.00147905	0.341174	0.250641	1.75793	0.19659	0.558429	0.384486	0.346307	0.0735449
C52E4.7	0.9213	0.99968	0.704485	0.999945	0.0968232	1.29826e-06	0.135365	0.00290786	0.508265	0.374222	0.157582	0.000358369	0.340251	0.143577
C52G5.2	1.27349	0.99968	0.606752	0.999945	0.401698	0.0267607	0.684306	0.6707	0.824307	0.831521	0.391878	0.0237811	0.517321	0.0861182
C53A5.13	1.34227	0.99968	1.59167	0.999945	2.92446	0.0244081	1.84685	0.382159	1.49381	0.815982	3.12158	0.0351679	2.26843	0.212145
C53A5.16	0.971998	0.99968	0.942391	0.999945	0.573282	0.294282	0.603054	0.523711	0.724834	0.835914	0.535191	0.282511	0.803177	0.828167
C53A5.17	1.08412	0.99968	0.894472	0.999945	0.65081	0.351614	0.718472	0.654684	0.920845	0.970524	0.595043	0.298232	0.711808	0.635116
C53A5.6	0.658539	0.99968	0.991244	0.999945	1.13187	0.790599	1.13477	0.859983	0.934604	0.968729	1.08504	0.865359	1.2602	0.665642
C53B4.2	1.19097	0.99968	1.11628	0.999945	0.213104	0.0141497	0.190674	0.0306358	0.825675	0.952253	0.183498	0.0662939	0.243297	0.310898
C53B4.3	0.799806	0.99968	0.840583	0.999945	1.35518	0.540301	1.62613	0.405939	1.07066	0.973577	1.66692	0.3344	1.70264	0.287074
C53B4.4	1.33758	0.99968	1.68702	0.999945	1.20961	0.617181	0.697208	0.643986	1.26468	0.765548	1.25051	0.592539	1.07632	0.896872
C53B7.2	0.80423	0.99968	1.19278	0.999945	4.4372	2.02521e-06	3.61773	0.0493418	0.474287	0.0165468	2.44629	0.0593605	5.59274	5.25974e-05
C53B7.3	0.340622	0.511745	1.91078	0.999945	10.856	3.04708e-07	5.57711	0.00586696	1.78379	0.49164	12.5419	1.30433e-06	7.68229	6.44164e-06
C53C11.2	1.03559	0.99968	0.912218	0.999945	0.883763	0.848009	0.994765	0.996705	0.71302	0.846876	1.07992	0.917924	1.65412	0.535932
C53C11.5	1.44542	0.99968	0.766697	0.999945	1.40564	0.405411	1.88585	0.407434	1.36197	0.749255	1.36896	0.571975	1.08839	0.915138
C53D5.1	0.805932	0.99968	0.913041	0.999945	0.858999	0.703595	0.94163	0.924685	0.956152	0.980763	1.10456	0.825919	1.25821	0.656692
C53D5.5	1.54029	0.99968	1.71673	0.999945	0.847873	0.680244	0.479573	0.310432	1.21364	0.794324	0.908537	0.855217	0.816392	0.721579
C53D6.10	0.719787	0.99968	0.556871	0.999945	0.0612673	9.62244e-10	0.107612	0.00225106	0.302846	0.0198482	0.111131	5.33882e-05	0.389047	0.366437
C53D6.11	1.2148	0.99968	1.15359	0.999945	2.15037	0.0307841	1.88554	0.282987	0.897153	0.95694	2.29513	0.0195902	2.78674	0.00820412
C53D6.4	0.731928	0.99968	0.995051	0.999945	0.541937	0.209899	0.543288	0.330986	0.833806	0.908341	0.605882	0.348795	0.793011	0.720953
C53D6.7	0.395259	0.233233	0.814071	0.999945	1.50399	0.271868	1.82429	0.329227	0.497731	0.24691	1.24513	0.629146	2.73565	0.0350568
C53H9.2	0.875428	0.99968	0.920798	0.999945	0.627449	0.274487	0.6846	0.562592	1.08441	0.968729	0.943999	0.914163	0.951712	0.947898
C53H9.3	0.797502	0.99968	0.701073	0.999945	0.431307	0.00833073	0.618793	0.386323	0.700548	0.544106	0.339867	0.00360853	0.52572	0.153697
C54C6.11	0.886182	0.99968	0.82065	0.999945	0.205379	0.0123137	0.249133	0.12126	0.586511	0.720628	0.264099	0.104019	0.489698	0.610369
C54C6.5	0.769961	0.99968	0.802519	0.999945	1.76623	0.201376	2.24812	0.176319	1.10511	0.960129	1.51277	0.411429	1.50138	0.418313
C54C6.6	0.911745	0.99968	0.841204	0.999945	0.595064	0.1464	0.711265	0.557799	0.667644	0.481847	0.719591	0.39318	1.17732	0.777721
C54C6.7	0.822512	0.99968	0.593661	0.999945	3.39359	0.0285638	5.75238	0.0145216	0.783256	0.90789	4.85914	1.61934e-05	6.90648	3.15859e-06
C54D1.7	0.627538	0.99968	1.83992	0.999945	2.97818	0.00801728	1.61372	0.452535	1.606	0.720059	2.25256	0.10155	1.5344	0.548045
C54D10.10	0.191087	0.000604614	0.345334	0.751497	0.440114	0.0662351	1.24156	0.824148	0.284947	0.00259634	0.592661	0.246865	2.30905	0.124704
C54D10.13	1.31178	0.99968	0.841035	0.999945	1.84131	0.281458	2.18804	0.240152	0.724306	0.853475	1.37868	0.619714	2.08577	0.256548
C54D10.3	1.02404	0.99968	1.26949	0.999945	3.07695	0.000110058	2.44837	0.0691397	1.35177	0.616404	2.66101	0.00477232	2.14075	0.0677623
C54D10.4	0.949904	0.99968	0.408779	0.999945	0.0868076	3.49659e-05	0.206619	0.126267	0.551641	0.593594	0.0781304	6.66976e-05	0.157021	0.0538844
C54D10.5	0.769728	0.99968	0.46881	0.999945	1.27738	0.691169	2.8098	0.298237	0.652893	0.825898	1.17417	0.82886	1.94598	0.452254
C54D2.1	0.820138	0.99968	0.274115	0.352529	0.513251	0.245453	1.88479	0.478318	0.293555	0.111213	0.564109	0.345929	2.18551	0.411526
C54D2.2	1.1454	0.99968	1.05351	0.999945	1.39416	0.476185	1.339	0.637071	1.62295	0.514053	1.67499	0.319751	1.12674	0.866047
C54E10.6	1.19562	0.99968	1.31179	0.999945	2.29852	0.0427364	1.77491	0.385197	1.72531	0.539471	2.29743	0.0582961	1.44845	0.531114
C54E4.4	0.283731	0.530795	0.72753	0.999945	2.21567	0.085589	3.02377	0.0785337	0.697797	0.853344	2.36266	0.0730073	3.63155	0.0388498
C54E4.5	1.26473	0.99968	1.64782	0.999945	13.6999	5.9964e-11	8.51284	0.00039623	1.84782	0.124609	14.8091	3.62642e-09	8.68133	2.63247e-06
C54F6.20	1.39256	0.99968	0.904616	0.999945	1.77701	0.245791	1.96694	0.339494	0.948476	0.986338	1.53913	0.518421	1.74903	0.518822
C54F6.3	1.51395	0.99968	0.62587	0.999945	0.218722	0.0235062	0.370111	0.504973	1.07346	0.981453	0.718988	0.76288	0.741036	0.8328
C54G4.2	0.964973	0.99968	0.661523	0.999945	0.0607508	0.000241289	0.0896832	0.0243497	0.754735	0.904419	0.074969	0.00374514	0.0987102	0.0504908
C54G4.3	0.938	0.99968	0.896829	0.999945	0.14535	5.93783e-08	0.16166	0.000228469	0.657776	0.539471	0.253167	0.000691897	0.423505	0.115596
C54G4.4	1.48505	0.99968	0.688642	0.999945	0.449394	0.239991	0.68186	0.776544	1.20213	0.937404	0.713351	0.691555	0.641375	0.633286
C54G4.5	1.13046	0.99968	0.886165	0.999945	1.81872	0.268002	2.03851	0.339213	1.37412	0.864356	1.74419	0.361076	1.39369	0.677983
C54G4.7	0.944669	0.99968	1.07787	0.999945	0.921529	0.830224	0.84768	0.787208	0.900569	0.924614	0.99979	0.999554	1.20918	0.663353
C54G4.9	0.87458	0.99968	0.998399	0.999945	0.367372	0.0179222	0.362247	0.122479	0.606232	0.547729	0.391242	0.03391	0.706274	0.654405
C54G6.3	0.635963	0.99968	1.00598	0.999945	0.912284	0.898343	0.904875	0.901854	1.07806	0.980648	1.08878	0.920946	1.10374	0.918117
C54G6.8	1.23865	0.99968	0.787236	0.999945	0.0321726	8.36458e-06	0.0383156	0.00996484	0.819118	0.920871	0.0859351	0.000187998	0.114132	0.00808603
C54H2.4	0.958727	0.99968	0.466738	0.999945	0.715494	0.591439	1.55996	0.643986	0.470547	0.665911	1.12914	0.86836	2.68485	0.377662
C55A6.1	0.708386	0.99968	0.828297	0.999945	0.282586	5.43178e-05	0.336771	0.0419787	0.601432	0.163856	0.368556	0.000990773	0.668032	0.319979
C55A6.10	1.04454	0.99968	1.24969	0.999945	1.12126	0.769709	0.888992	0.857409	1.10025	0.94575	0.951058	0.914279	0.942609	0.916073
C55A6.11	1.03702	0.99968	0.62867	0.999945	0.139505	0.000123198	0.22209	0.0140643	0.565193	0.538958	0.184724	0.00240905	0.355772	0.11293
C55A6.12	0.988592	0.99968	0.720173	0.999945	1.0647	0.89375	1.4825	0.496545	0.741654	0.634421	1.02985	0.951878	1.51554	0.286498
C55A6.3	1.01089	0.99968	0.635324	0.999945	0.581561	0.291384	0.910149	0.913663	0.781461	0.872373	0.676644	0.514934	0.946011	0.955492
C55A6.4	1.06383	0.99968	0.814656	0.999945	0.767037	0.559989	0.958703	0.959349	0.823586	0.893639	0.643517	0.538546	0.859489	0.888526
C55A6.6	0.886946	0.99968	1.26953	0.999945	2.9171	0.0111181	2.30612	0.188964	1.8975	0.298386	2.93355	0.00454245	1.68126	0.272562
C55A6.7	0.905907	0.99968	0.511004	0.999945	0.583779	0.233553	1.1331	0.855998	0.519639	0.211744	0.57331	0.305678	1.19958	0.798174
C55B6.1	0.682546	0.99968	2.49821	0.521821	4.89395	6.50221e-07	1.96669	0.201578	1.09746	0.969712	4.46858	0.000103748	4.41003	0.00112199
C55B7.10	1.13779	0.99968	0.9506	0.999945	0.179078	0.000109744	0.187229	0.00280168	0.736401	0.788211	0.179153	0.000540649	0.2635	0.0241217
C55B7.11	0.774821	0.99968	0.994641	0.999945	0.168963	8.97795e-07	0.16836	0.000426831	0.820347	0.839779	0.254888	0.000255233	0.339317	0.00436161
C55B7.3	1.01836	0.99968	1.00284	0.999945	0.0582739	7.78124e-08	0.0576046	2.23712e-05	0.972577	0.989684	0.123529	1.45676e-05	0.137069	0.000120717
C55C2.3	0.714583	0.99968	0.482915	0.999945	0.0853823	0.00019947	0.173863	0.118425	0.524396	0.603306	0.0453401	0.00049727	0.0872006	0.0610803
C55C2.4	1.00386	0.99968	0.865704	0.999945	0.121714	0.00219613	0.13807	0.039321	0.748009	0.900842	0.137195	0.0111455	0.208977	0.165163
C55C3.1	1.49446	0.99968	0.37885	0.999945	0.677145	0.546481	1.83499	0.55943	0.596719	0.748488	0.88189	0.870775	1.65077	0.630377
C55C3.3	0.875026	0.99968	0.926003	0.999945	0.122336	9.96423e-07	0.130161	0.000403206	1.44674	0.635779	0.519923	0.155259	0.39062	0.0289454
C55C3.6	0.898532	0.99968	0.762893	0.999945	0.176953	0.0218904	0.229233	0.195833	1.05014	0.985651	0.194089	0.0211257	0.19773	0.0524717
C56A3.4	0.782843	0.99968	1.01332	0.999945	0.822759	0.595904	0.796019	0.750729	0.72244	0.517357	0.897678	0.788577	1.35579	0.429436
C56A3.5	0.878618	0.99968	1.07043	0.999945	0.486284	0.058453	0.449286	0.184014	0.888984	0.933405	0.617766	0.242536	0.759333	0.596303
C56A3.6	0.87153	0.99968	1.15933	0.999945	0.993755	0.989618	0.849915	0.805696	1.08408	0.958443	1.22144	0.650263	1.22937	0.653614
C56A3.8	0.948743	0.99968	0.775036	0.999945	0.168096	1.91597e-05	0.214995	0.00962494	0.720408	0.748478	0.280437	0.00508944	0.424573	0.126588
C56C10.4	1.38702	0.99968	0.471837	0.999945	0.368631	0.118611	0.816493	0.880781	1.05592	0.973583	0.585075	0.355598	0.600991	0.443256
C56C10.6	0.904998	0.99968	0.90203	0.999945	0.150345	0.0128353	0.163379	0.073277	0.826576	0.950233	0.161024	0.0293993	0.206127	0.141559
C56C10.7	1.03574	0.99968	1.46871	0.999945	0.846525	0.751509	0.573449	0.379335	1.12377	0.95635	1.02639	0.969374	0.995326	0.995817
C56C10.9	0.712252	0.99968	1.26604	0.999945	0.632573	0.294916	0.491232	0.301048	1.05291	0.98131	0.614996	0.319751	0.635341	0.429436
C56E6.2	1.26699	0.99968	0.604662	0.999945	0.376809	0.00082252	0.633091	0.429588	0.631983	0.459071	0.398885	0.0025587	0.686043	0.516416
C56G2.15	0.679741	0.99968	0.884151	0.999945	0.868007	0.763662	0.964453	0.964204	1.08725	0.974055	0.853888	0.761567	0.845369	0.863798
C56G2.3	0.897126	0.99968	1.09129	0.999945	0.522324	0.338242	0.480489	0.357189	0.759607	0.906015	0.667084	0.623326	0.959442	0.973523
C56G2.4	1.03176	0.99968	0.649212	0.999945	1.13898	0.842826	1.79985	0.514308	1.16919	0.948735	1.02241	0.978141	0.946179	0.95023
C56G2.5	1.33375	0.99968	0.943003	0.999945	0.0615667	3.04676e-05	0.064945	0.000490645	0.853206	0.951101	0.14229	0.00844612	0.184189	0.056538
C56G7.3	1.06422	0.99968	0.872368	0.999945	1.10324	0.808458	1.2736	0.67812	0.978372	0.989684	1.39966	0.37449	1.55794	0.265213
cab-1	1.11269	0.99968	1.28418	0.999945	3.22911	7.47666e-05	2.50595	0.054676	1.3658	0.512063	2.50959	0.00130568	2.00269	0.0168139
cacn-1	0.968607	0.99968	1.02978	0.999945	0.420082	0.0193918	0.399993	0.148281	0.698957	0.596614	0.505909	0.0794439	0.787878	0.682681
cah-1	0.82036	0.99968	1.04136	0.999945	1.26271	0.707082	1.2138	0.822279	1.02317	0.995211	0.956347	0.961459	1.00151	0.999055
cah-2	1.21702	0.99968	0.979547	0.999945	1.79495	0.228777	1.86329	0.39777	1.08457	0.978966	1.56107	0.463533	1.55893	0.54884
cah-3	0.853309	0.99968	1.49188	0.999945	2.13696	0.0234622	1.42895	0.50572	1.87012	0.110269	1.67322	0.246765	0.974719	0.969512
cah-4	0.885684	0.99968	1.24211	0.999945	1.86927	0.0609682	1.51662	0.39998	0.977921	0.988189	1.30429	0.512542	1.4581	0.280227
cah-5	0.751697	0.99968	0.776818	0.999945	1.05893	0.895678	1.34575	0.624786	0.759117	0.651328	0.469495	0.141859	0.671302	0.531425
cah-6	0.7794	0.99968	0.833338	0.999945	1.00766	0.990346	1.24248	0.827807	1.32802	0.852708	1.15192	0.827735	0.942257	0.946728
cal-1	0.99742	0.99968	1.18242	0.999945	2.93404	0.00122977	2.51006	0.0879331	1.12127	0.937765	2.60626	0.00564487	2.53822	0.0244927
cal-2	1.018	0.99968	1.34235	0.999945	2.78963	0.000702099	2.08814	0.13262	1.44051	0.571878	2.75648	0.00126852	2.08177	0.0271631
cal-3	1.27086	0.99968	2.86441	0.718267	5.0041	0.000250572	1.75406	0.383899	2.33035	0.327208	3.93408	0.015893	1.83084	0.380763
cal-4	1.16425	0.99968	0.869756	0.999945	1.92381	0.0484063	2.24638	0.155883	1.23407	0.830112	1.81676	0.0815889	1.60226	0.253764
cal-5	0.826907	0.99968	1.57213	0.999945	3.25273	1.73051e-05	2.05755	0.142303	1.11235	0.920051	2.52681	0.024671	2.47254	0.03351
calm-1	0.976365	0.99968	0.900729	0.999945	1.02492	0.961706	1.14958	0.852806	0.73162	0.787703	0.855565	0.791725	1.27153	0.75516
calu-1	1.21507	0.99968	0.95538	0.999945	1.11847	0.789773	1.19703	0.809919	1.23468	0.786503	0.701017	0.359982	0.618588	0.174418
calu-2	1.22905	0.99968	1.25361	0.999945	1.48988	0.375741	1.20311	0.803422	1.2805	0.84982	1.33141	0.602049	1.12935	0.874682
cam-1	1.36085	0.99968	1.41819	0.999945	1.08505	0.870231	0.751752	0.697206	0.988837	0.996172	1.00853	0.988801	1.11638	0.885583
camt-1	1.53539	0.99968	2.07102	0.999945	3.06652	0.00131853	1.49407	0.490725	2.20643	0.160216	2.9438	0.00436532	1.45277	0.526052
cand-1	1.27026	0.99968	1.04302	0.999945	0.980048	0.960875	0.936981	0.916298	1.01888	0.989684	0.984421	0.971912	1.05193	0.920486
cap-1	1.01881	0.99968	1.05911	0.999945	1.26653	0.479998	1.19814	0.746156	0.950976	0.968729	1.22908	0.555243	1.40742	0.316546
cap-2	0.956111	0.99968	1.06662	0.999945	1.39747	0.283262	1.30979	0.608278	1.04591	0.972262	1.65266	0.093189	1.72197	0.0680146
capa-1	1.60366	0.99968	1.67957	0.999945	3.43924	0.0075018	2.08269	0.320531	2.11659	0.327208	5.55798	2.93837e-06	2.86832	0.0103662
capg-1	1.29095	0.99968	1.30176	0.999945	0.556779	0.082402	0.417096	0.161822	0.882449	0.908078	0.586377	0.127366	0.722736	0.40999
capg-2	1.09199	0.99968	1.7549	0.999945	0.215385	7.78196e-05	0.119447	0.000523319	0.523316	0.301871	0.346443	0.0199955	0.7166	0.671714
car-1	0.942831	0.99968	1.53094	0.999945	0.398905	0.000859701	0.253978	0.0152722	0.812125	0.732124	0.513872	0.025925	0.688762	0.283397
cars-1	1.37906	0.99968	1.22875	0.999945	0.735098	0.422055	0.589664	0.3399	1.08731	0.953969	0.857084	0.732621	0.857219	0.731737
cas-1	1.20016	0.99968	1.09543	0.999945	1.87056	0.0346862	1.70181	0.285164	0.97492	0.985651	1.64204	0.112529	1.83317	0.0473038
cas-2	1.10186	0.99968	1.2921	0.999945	0.409269	0.00430803	0.313869	0.0156758	0.97873	0.989684	0.492959	0.0403494	0.549252	0.139362
cash-1	0.988298	0.99968	1.07279	0.999945	0.667505	0.263094	0.608495	0.478114	0.860932	0.88667	0.66778	0.279455	0.845084	0.745766
casy-1	1.09684	0.99968	1.12952	0.999945	1.90935	0.0797059	1.70275	0.349391	1.23869	0.773302	1.72801	0.11752	1.51724	0.193485
cat-4	0.885362	0.99968	1.00516	0.999945	1.7213	0.0642209	1.69487	0.32805	0.701982	0.481542	1.28958	0.464641	2.00003	0.0341317
catp-1	1.12372	0.99968	1.63511	0.999945	2.51109	0.0223246	1.5162	0.549521	1.19377	0.938706	2.23198	0.119964	2.04136	0.271674
catp-3	1.48739	0.99968	4.07958	0.674176	4.91875	0.0011118	1.15655	0.905458	0.392793	0.210578	1.02647	0.969658	2.85743	0.0816135
catp-4	1.13535	0.99968	0.656747	0.999945	0.0705856	4.50248e-12	0.105813	0.000143633	0.600808	0.383961	0.0798773	3.81209e-08	0.146357	0.000651638
catp-5	1.45051	0.99968	1.05735	0.999945	1.48933	0.315989	1.39352	0.579514	1.35569	0.688137	1.35811	0.480029	1.08951	0.878852
catp-6	1.20427	0.99968	1.53597	0.999945	0.80811	0.617181	0.51445	0.342648	0.955553	0.979373	0.914295	0.85609	1.04442	0.938261
catp-7	1.38714	0.99968	1.36373	0.999945	1.76071	0.0545452	1.28918	0.634273	1.6442	0.184407	1.99235	0.0223163	1.3207	0.502757
catp-8	1.60059	0.99968	1.20483	0.999945	0.95957	0.926306	0.788757	0.670534	1.11802	0.927252	1.08608	0.859836	1.05721	0.913984
cav-2	0.698728	0.99968	0.451805	0.923579	1.07057	0.886912	2.36047	0.146347	0.503915	0.295479	0.958686	0.940962	2.07003	0.181413
cbd-1	1.10655	0.99968	2.04302	0.999945	0.0744055	1.03098e-20	0.0347181	1.2746e-05	0.366042	5.96685e-05	0.139095	1.84743e-13	0.413956	0.00571783
cbl-1	1.02124	0.99968	0.684137	0.999945	1.04021	0.93568	1.52622	0.450183	1.10108	0.953028	1.01387	0.980771	1.00058	0.999168
cblc-1	0.925862	0.99968	3.52608	0.227056	0.654938	0.342845	0.190201	0.00195311	3.97374	4.20395e-06	0.998283	0.997883	0.274016	3.65683e-05
cbn-1	1.71101	0.99968	2.05106	0.999945	1.31697	0.645472	0.67274	0.734275	2.93864	0.0419139	1.4777	0.532089	0.545766	0.300266
cbp-1	1.02212	0.99968	1.35893	0.999945	1.2676	0.506328	0.929461	0.905904	1.29906	0.667093	1.38177	0.36646	1.16034	0.744831
cbp-2	0.732908	0.99968	1.11951	0.999945	2.73414	0.000923716	2.43863	0.0627501	1.01537	0.99433	3.04944	0.000262595	3.26991	0.000329485
cbp-3	0.847772	0.99968	1.14296	0.999945	3.09375	6.86347e-05	2.71406	0.0236623	0.969111	0.985651	3.53001	1.03251e-05	3.96708	1.41208e-06
cbs-1	1.06638	0.99968	0.205046	0.00341055	1.27157	0.552003	6.1995	1.72212e-05	0.238959	5.80788e-06	1.26732	0.567137	5.76423	6.57792e-09
cbs-2	0.687984	0.99968	0.845897	0.999945	0.0471022	0.000107257	0.0555907	0.00297003	0.762678	0.899808	0.123043	0.00439508	0.1764	0.0823781
CC8.2	0.63007	0.99968	1.72708	0.999945	0.763793	0.492782	0.439178	0.118489	2.06249	0.0398455	1.50775	0.245348	0.796926	0.63562
cca-1	1.44	0.99968	1.50055	0.999945	2.94495	0.00293589	2.00997	0.326374	1.70636	0.545645	2.41047	0.0419587	1.53221	0.468324
ccar-1	2.15246	0.72886	1.68187	0.999945	0.988929	0.983784	0.590612	0.320443	0.844092	0.914435	1.0718	0.915416	1.39225	0.596025
ccb-1	1.36201	0.99968	1.12794	0.999945	1.29328	0.542507	1.15517	0.828938	1.68602	0.370028	1.35455	0.516999	0.873475	0.823481
ccch-1	0.797581	0.99968	0.717985	0.999945	1.58982	0.117101	2.17441	0.178248	0.431601	0.00672219	1.27371	0.503655	3.22701	0.000550609
ccch-3	0.818609	0.99968	0.961342	0.999945	0.380949	0.0319572	0.390618	0.177012	0.931586	0.972464	0.486005	0.14404	0.570439	0.353672
cccp-1	1.32613	0.99968	1.15016	0.999945	1.57806	0.250351	1.36779	0.614932	1.36253	0.751446	1.67249	0.222485	1.33812	0.597089
ccdc-47	1.05086	0.99968	1.10383	0.999945	0.845336	0.623504	0.765714	0.613571	1.22445	0.751938	0.878516	0.747937	0.782799	0.557195
ccdc-55	0.932777	0.99968	0.891303	0.999945	0.652918	0.260378	0.72459	0.608774	0.849303	0.876226	0.747026	0.471841	0.958001	0.944356
ccf-1	0.905418	0.99968	1.02852	0.999945	0.689959	0.263229	0.667461	0.451723	0.931249	0.957458	0.820807	0.60517	0.961038	0.935638
ccg-1	1.07299	0.99968	1.44521	0.999945	3.15877	0.000461682	2.18448	0.134538	1.3042	0.688739	2.41259	0.0137241	2.00836	0.0597089
cchl-1	0.826987	0.99968	0.954221	0.999945	0.534733	0.0574808	0.557727	0.271367	0.930398	0.956334	0.593159	0.118828	0.695201	0.296037
ccm-3	1.47287	0.99968	1.11938	0.999945	0.902056	0.820609	0.807825	0.727981	1.26136	0.741786	1.06323	0.893155	0.919393	0.86925
ccnk-1	0.860693	0.99968	0.984138	0.999945	0.500532	0.0524837	0.504445	0.218978	0.951697	0.977106	0.600553	0.208156	0.688961	0.39511
ccpp-1	1.25841	0.99968	2.35284	0.992305	0.822217	0.723777	0.343201	0.098758	1.39808	0.783337	0.840957	0.786337	0.655759	0.507746
ccr-4	1.0826	0.99968	0.847931	0.999945	0.651773	0.171124	0.768262	0.626573	0.890396	0.898372	0.687629	0.260443	0.842364	0.699463
cct-1	1.27364	0.99968	0.910463	0.999945	0.765273	0.428136	0.831508	0.751793	0.996428	0.997747	0.968672	0.950459	1.06015	0.914967
cct-2	0.999696	0.99968	1.00364	0.999945	0.708887	0.26796	0.699038	0.526452	1.02619	0.985145	0.929022	0.859899	0.988338	0.982899
cct-3	1.22826	0.99968	0.941226	0.999945	0.914773	0.812478	0.96045	0.954242	1.1993	0.819305	1.07802	0.867524	0.979866	0.972773
cct-4	1.04128	0.99968	0.835922	0.999945	0.650191	0.1715	0.772504	0.631664	0.811101	0.742501	0.881136	0.766159	1.18427	0.707544
cct-5	0.989284	0.99968	0.861502	0.999945	0.660094	0.163404	0.761145	0.609815	0.897865	0.906015	0.8716	0.716602	1.05811	0.905064
cct-6	0.929489	0.99968	0.955896	0.999945	0.689304	0.386308	0.724082	0.531488	0.944823	0.973577	1.21755	0.698616	1.40852	0.379865
cct-7	1.23036	0.99968	1.00987	0.999945	0.76481	0.395862	0.7494	0.609135	0.989796	0.995184	0.982159	0.97133	1.08306	0.887701
cct-8	1.06609	0.99968	0.77078	0.999945	0.651039	0.264611	0.844255	0.789366	0.849283	0.859362	0.878615	0.783418	1.12583	0.829977
ccz-1	0.955821	0.99968	0.969168	0.999945	0.659434	0.25375	0.673223	0.511578	0.914746	0.952144	0.718826	0.420088	0.857542	0.756731
CD4.10	0.889724	0.99968	1.73141	0.999945	0.386522	0.0563295	0.219417	0.0158528	1.21326	0.899808	0.342357	0.0190192	0.301167	0.0360685
CD4.8	1.00231	0.99968	1.14282	0.999945	0.335525	0.00227467	0.289453	0.0223747	0.897337	0.943247	0.40184	0.0201746	0.489203	0.0783738
cdap-2	1.02746	0.99968	1.30924	0.999945	1.61649	0.168642	1.22692	0.729711	1.30138	0.704331	2.0986	0.0286198	1.76143	0.0812621
cdc-14	0.947896	0.99968	1.17491	0.999945	0.812516	0.646803	0.68431	0.541337	0.929649	0.966706	0.93373	0.899889	1.09651	0.857167
cdc-25.1	0.66073	0.99968	1.20939	0.999945	0.212305	7.83368e-07	0.170153	0.00576691	0.558329	0.131786	0.245658	5.25458e-05	0.48015	0.0813922
cdc-25.2	0.914651	0.99968	1.8453	0.999945	0.631728	0.370403	0.343239	0.0495873	1.50821	0.655352	1.03647	0.957701	0.749821	0.649937
cdc-26	0.822738	0.99968	0.854494	0.999945	0.280983	0.00447256	0.327976	0.0918422	0.730529	0.740397	0.358596	0.0431463	0.533754	0.366802
cdc-37	1.03524	0.99968	0.809798	0.999945	0.592487	0.125067	0.728373	0.566183	0.767081	0.642035	0.732445	0.385805	1.03873	0.936654
cdc-42	1.01327	0.99968	1.05968	0.999945	1.56672	0.18337	1.4794	0.435305	0.954284	0.973577	1.66085	0.148918	1.89863	0.0293611
cdc-48.1	1.30493	0.99968	1.40154	0.999945	1.03214	0.939382	0.721347	0.633903	1.14971	0.862731	1.29512	0.445567	1.22754	0.601944
cdc-48.2	1.27352	0.99968	1.26223	0.999945	0.796736	0.504276	0.624185	0.402124	1.36793	0.564142	1.05175	0.905292	0.838574	0.702834
cdc-48.3	1.11908	0.99968	0.936605	0.999945	0.555678	0.198803	0.585443	0.463631	0.971277	0.98991	0.804678	0.702794	0.902965	0.900515
cdc-5L	0.966663	0.99968	1.3357	0.999945	0.609373	0.0936313	0.447327	0.173839	1.12907	0.889687	0.849623	0.656818	0.820656	0.626612
cdc-6	0.981533	0.99968	1.18378	0.999945	0.43397	0.0245076	0.359844	0.0948749	0.897353	0.937905	0.619636	0.254675	0.753793	0.516457
cdc-7	0.690058	0.99968	1.12023	0.999945	0.206197	1.66403e-06	0.180481	0.00162676	0.59883	0.283639	0.284283	0.000664406	0.519045	0.164044
cdc-73	0.873533	0.99968	0.901933	0.999945	0.415807	0.0220914	0.455393	0.217646	0.61309	0.547203	0.49111	0.0930979	0.880129	0.884477
cdd-1	0.93251	0.99968	0.91323	0.999945	1.4898	0.365592	1.63123	0.442909	1.25486	0.881794	1.62464	0.36879	1.41037	0.627862
cdd-2	0.879149	0.99968	0.723424	0.999945	0.429381	0.00546538	0.600414	0.363755	0.556982	0.133014	0.485067	0.0224412	0.944288	0.925413
cdf-1	1.10957	0.99968	1.19046	0.999945	1.79051	0.0621585	1.48603	0.502615	1.07783	0.958443	1.71276	0.107146	1.73277	0.115596
cdf-2	1.4309	0.99968	0.38297	0.999945	0.583838	0.300736	1.57234	0.654137	1.08231	0.973577	0.356896	0.0656412	0.356628	0.106283
cdgs-1	0.828639	0.99968	1.05805	0.999945	1.20771	0.622584	1.13797	0.838187	1.10632	0.933405	1.37742	0.38003	1.35619	0.450766
cdh-1	1.20568	0.99968	1.50102	0.999945	2.19109	0.061521	1.46924	0.542731	1.92893	0.303524	2.35078	0.0457874	1.32533	0.608236
cdh-10	1.63923	0.99968	4.03976	0.999945	0.604839	0.477744	0.157634	0.0978811	6.67148	3.5673e-06	2.59264	0.174732	0.417089	0.161724
cdh-12	2.11102	0.99968	2.73718	0.999945	0.624498	0.578931	0.238415	0.223472	4.65434	0.236186	1.11128	0.920753	0.258615	0.023322
cdh-4	1.84929	0.99968	1.66075	0.999945	1.02036	0.974418	0.608943	0.463631	1.6465	0.569907	1.34683	0.646917	0.892226	0.888526
cdh-5	2.51046	0.626635	1.40303	0.999945	0.704495	0.633697	0.527731	0.620566	2.37865	0.229652	0.824815	0.831776	0.375436	0.173365
cdh-7	1.49503	0.99968	4.14787	0.999945	0.461715	0.33985	0.117312	0.0814821	8.37889	1.87547e-06	2.40576	0.191909	0.309696	0.0281158
cdh-8	1.26955	0.99968	1.05851	0.999945	0.912669	0.893339	0.84493	0.852481	1.56691	0.733038	0.676571	0.580551	0.466289	0.30639
cdh-9	1.7343	0.99968	1.0831	0.999945	1.07167	0.911426	1.02887	0.980963	1.13295	0.953028	1.30666	0.66649	1.26249	0.773401
cdk-1	0.854212	0.99968	1.11567	0.999945	0.187942	1.61964e-09	0.165148	0.000369544	0.765006	0.6308	0.277933	1.70683e-05	0.396344	0.00110151
cdk-11.1	0.636596	0.99968	1.40266	0.999945	0.481466	0.0662241	0.337321	0.0735824	0.728017	0.736477	0.535739	0.180474	0.801999	0.746378
cdk-11.2	1.26381	0.99968	1.36983	0.999945	1.24509	0.714518	0.896433	0.889314	1.95875	0.374222	1.513	0.493395	0.839581	0.798193
cdk-12	1.15283	0.99968	1.18878	0.999945	0.547815	0.0678678	0.453585	0.158783	0.816931	0.817405	0.649609	0.267315	0.867049	0.799647
cdk-4	1.14071	0.99968	1.44775	0.999945	1.55875	0.275875	1.07327	0.91923	1.88462	0.259311	1.87856	0.17471	1.08664	0.907875
cdk-5	0.84621	0.99968	0.85882	0.999945	0.576097	0.0955434	0.662244	0.501176	0.621413	0.24008	0.603521	0.111862	1.06	0.914671
cdk-7	0.890092	0.99968	1.23134	0.999945	0.63953	0.23987	0.513625	0.261703	0.873438	0.91579	0.62608	0.269677	0.78076	0.660666
cdk-8	0.908356	0.99968	1.31387	0.999945	0.843334	0.775461	0.63307	0.557097	0.876838	0.960085	0.909367	0.898791	1.13129	0.90691
cdk-9	0.79767	0.99968	1.04481	0.999945	0.690819	0.419988	0.653333	0.526605	0.914188	0.949543	0.798124	0.590793	0.949324	0.923323
cdka-1	1.12919	0.99968	1.05367	0.999945	1.58123	0.175235	1.52667	0.476996	1.34655	0.664036	1.29473	0.51092	1.04893	0.934374
cdkr-3	1.12999	0.99968	1.15073	0.999945	1.0329	0.939236	0.90414	0.873332	1.21271	0.822086	1.18428	0.690642	1.06277	0.913902
cdl-1	0.893035	0.99968	1.09858	0.999945	0.232869	1.78629e-08	0.208315	0.000918106	0.672846	0.31126	0.335207	4.22607e-05	0.542692	0.0508214
cdo-1	1.1665	0.99968	1.01332	0.999945	1.82599	0.0391451	1.83085	0.278325	0.812622	0.809572	1.40744	0.315819	1.88897	0.0927189
cdr-2	0.81067	0.99968	0.723877	0.999945	2.05489	0.0419767	2.86572	0.0422239	0.510613	0.0690153	2.02021	0.0865489	4.30269	9.52865e-05
cdr-4	0.739448	0.99968	1.53374	0.999945	6.67097	2.11713e-05	4.27564	0.0361246	0.676164	0.37631	9.80978	4.97633e-08	15.7524	1.95041e-12
cdr-6	1.13157	0.99968	0.915851	0.999945	1.65447	0.152075	1.81965	0.28027	1.18388	0.853747	1.56047	0.285071	1.42788	0.475302
cdr-7	0.77265	0.99968	1.86273	0.999945	3.80613	0.00375118	2.04094	0.254412	1.75449	0.629043	3.00332	0.0411566	1.84802	0.356227
cdt-2	0.774011	0.99968	1.47415	0.999945	0.20362	4.64603e-05	0.13511	0.000647538	1.05076	0.980417	0.451701	0.0690833	0.469788	0.0589773
cebp-1	1.099	0.99968	1.38582	0.999945	3.01569	0.000218734	2.13681	0.210551	1.02512	0.989684	2.42975	0.00665615	2.57842	0.00681724
cebp-2	0.915292	0.99968	0.971841	0.999945	0.856565	0.73814	0.869794	0.852322	1.16509	0.912263	0.936706	0.908585	0.876679	0.832599
cec-1	1.07748	0.99968	0.993855	0.999945	1.48339	0.209833	1.49726	0.431102	1.21977	0.786933	1.41198	0.308909	1.2601	0.566589
cec-10	0.825212	0.99968	1.46414	0.999945	0.67384	0.288001	0.45273	0.191384	1.05028	0.973577	0.955699	0.920692	0.992237	0.989929
cec-2	0.792358	0.99968	0.898311	0.999945	0.506246	0.0993694	0.549728	0.439571	0.599925	0.373216	0.587502	0.315875	1.07197	0.934203
cec-3	0.814752	0.99968	1.0752	0.999945	0.321057	6.5959e-05	0.294385	0.012992	0.748235	0.59252	0.432556	0.00391963	0.62984	0.214472
cec-4	0.898307	0.99968	1.04431	0.999945	0.412206	0.00837507	0.390413	0.0837702	0.786406	0.789444	0.480649	0.0399934	0.668331	0.422224
cec-5	1.05305	0.99968	1.31669	0.999945	0.695421	0.295177	0.5306	0.181932	1.29781	0.700225	0.927531	0.866762	0.780196	0.578534
cec-6	1.16433	0.99968	1.39962	0.999945	0.670448	0.291262	0.468343	0.253844	1.05988	0.971142	0.655133	0.277306	0.672824	0.376008
cec-7	0.887724	0.99968	1.26467	0.999945	0.33324	0.000607114	0.259245	0.011243	0.691128	0.552589	0.425349	0.0141009	0.670489	0.415091
cec-8	1.03284	0.99968	1.57223	0.999945	2.12574	0.157646	1.33529	0.72277	1.27891	0.922439	2.41998	0.115836	2.0755	0.270804
ced-1	1.46957	0.99968	2.13875	0.999945	3.00126	0.000210236	1.34827	0.758393	1.57435	0.43137	2.80358	0.000992602	1.93897	0.0640815
ced-10	1.22397	0.99968	1.00987	0.999945	1.24481	0.565802	1.23514	0.721705	1.22635	0.787955	1.39934	0.330264	1.24361	0.616916
ced-12	0.868115	0.99968	2.19727	0.972128	1.39091	0.469172	0.624588	0.475309	1.55823	0.620039	1.1771	0.811515	0.817695	0.806951
ced-2	0.998083	0.99968	1.1366	0.999945	0.750034	0.457205	0.635378	0.598426	0.800339	0.785447	0.538197	0.0734574	0.730731	0.475909
ced-3	0.746912	0.99968	1.35765	0.999945	0.254101	0.0032693	0.182672	0.0118649	0.587398	0.569907	0.341016	0.0365903	0.638225	0.555112
ced-4	0.926331	0.99968	1.23696	0.999945	0.568125	0.173545	0.452519	0.197492	1.00201	0.998487	0.564568	0.2055	0.61482	0.251037
ced-5	1.04216	0.99968	1.63644	0.999945	1.03154	0.941412	0.616264	0.470771	0.997198	0.997789	0.880023	0.75017	0.960592	0.943469
ced-6	0.787744	0.99968	1.2837	0.999945	1.4364	0.339325	1.0969	0.906745	0.893408	0.947506	1.27548	0.581294	1.55419	0.354107
ced-7	1.81106	0.99968	1.55639	0.999945	1.70089	0.113089	1.08007	0.908762	1.42258	0.584518	1.50875	0.290493	1.1544	0.793193
ced-9	0.757981	0.99968	1.08498	0.999945	0.430402	0.0131072	0.38927	0.120696	0.617163	0.285363	0.489401	0.0468601	0.865603	0.769985
cee-1	0.948145	0.99968	1.01655	0.999945	0.621879	0.198349	0.607661	0.368586	0.899205	0.93338	0.783261	0.569933	0.951281	0.920103
ceeh-1	1.08691	0.99968	0.950867	0.999945	3.25618	0.00665309	3.40558	0.0400789	0.998376	0.999066	1.87895	0.349799	2.03589	0.379353
ceeh-2	0.891687	0.99968	0.967222	0.999945	2.14237	0.0408737	2.22474	0.137497	1.28084	0.833921	1.26412	0.658729	1.07407	0.920644
ceh-1	0.80447	0.99968	0.991962	0.999945	1.28857	0.713079	1.31286	0.758129	0.747416	0.923322	0.891074	0.905287	1.29501	0.846955
ceh-100	1.33292	0.99968	1.65795	0.999945	0.751568	0.485605	0.44074	0.235885	1.11555	0.943746	0.766259	0.546156	0.746313	0.566239
ceh-13	1.18878	0.99968	0.895193	0.999945	2.01309	0.0695478	2.31276	0.256528	1.05325	0.978937	1.47939	0.462742	1.53287	0.49187
ceh-18	1.10344	0.99968	0.72984	0.999945	1.26035	0.530453	1.73573	0.298843	0.860723	0.899369	1.00112	0.998531	1.26785	0.652586
ceh-19	0.894929	0.99968	1.44471	0.999945	2.46343	0.058453	1.69229	0.448946	1.37415	0.876226	1.976	0.244319	1.55122	0.594801
ceh-20	1.31471	0.99968	1.43081	0.999945	2.27299	0.0214583	1.61887	0.408517	1.91061	0.180586	2.43047	0.0161959	1.38863	0.495424
ceh-27	1.25715	0.99968	0.982549	0.999945	1.57707	0.356206	1.67282	0.631411	1.54855	0.7356	1.77146	0.273739	1.24303	0.790421
ceh-31	1.10086	0.99968	0.765704	0.999945	1.48626	0.450707	1.98338	0.384299	1.43127	0.790035	1.16497	0.826003	0.884136	0.881809
ceh-32	1.03664	0.99968	1.37464	0.999945	2.45893	0.0240292	1.82652	0.387972	1.59926	0.67868	2.56427	0.0258319	1.73813	0.361328
ceh-34	0.961067	0.99968	1.00742	0.999945	1.3489	0.556055	1.36474	0.698309	1.29204	0.860231	1.29287	0.621814	1.09105	0.918566
ceh-37	0.997763	0.99968	1.04621	0.999945	1.55063	0.163501	1.48914	0.445898	1.06067	0.973577	2.0015	0.0220304	2.06071	0.101398
ceh-38	1.14227	0.99968	1.66998	0.999945	0.807621	0.609954	0.474197	0.246921	1.12184	0.930488	1.07016	0.898686	1.04188	0.942175
ceh-43	1.10346	0.99968	1.27263	0.999945	1.39906	0.548195	1.14069	0.904636	1.68276	0.641267	1.51122	0.52434	0.981271	0.985308
ceh-44	1.15398	0.99968	1.4589	0.999945	0.947895	0.913448	0.644876	0.422419	1.06004	0.971142	0.979719	0.969095	1.00412	0.99429
ceh-48	1.4911	0.99968	1.23452	0.999945	0.86256	0.818795	0.709228	0.669282	1.34941	0.859362	0.805057	0.764712	0.650925	0.601497
ceh-58	1.00474	0.99968	1.25335	0.999945	0.933451	0.914219	0.740304	0.671298	1.24137	0.899013	1.61648	0.467894	1.42237	0.646923
ceh-6	0.893332	0.99968	0.64587	0.999945	0.659005	0.473093	1.03834	0.970895	0.967284	0.991593	0.723593	0.636216	0.814798	0.834729
ceh-60	0.994367	0.99968	0.672641	0.999945	1.29523	0.470078	1.89648	0.292335	0.490204	0.084182	0.951327	0.9185	2.11257	0.0591485
ceh-62	0.945613	0.99968	1.56692	0.999945	5.0821	4.65688e-06	3.29712	0.0333752	2.61977	0.0716018	7.80265	4.51827e-09	3.25384	0.00179972
ceh-79	0.933439	0.99968	0.884088	0.999945	1.36914	0.39365	1.55139	0.429766	0.642351	0.539471	1.05965	0.909869	1.79959	0.239445
ceh-88	1.07993	0.99968	1.18647	0.999945	1.57929	0.444842	1.33804	0.704934	1.61657	0.731932	2.03032	0.23207	1.36629	0.672232
ceh-89	0.73616	0.99968	0.871981	0.999945	1.59838	0.39936	1.86645	0.452679	1.14398	0.965823	1.47411	0.559658	1.39541	0.709579
ceh-92	1.05206	0.99968	1.44778	0.999945	0.276325	0.000338639	0.186076	0.00617472	0.619766	0.473312	0.326308	0.0048335	0.574575	0.345753
ceh-93	0.846051	0.99968	1.4171	0.999945	1.2104	0.764839	0.853124	0.852206	1.15428	0.961589	1.11732	0.886568	1.05159	0.962818
cel-1	1.0316	0.99968	1.14561	0.999945	0.66991	0.222962	0.573318	0.376337	0.901093	0.928487	0.843387	0.659589	1.01912	0.972773
cep-1	0.900774	0.99968	1.27546	0.999945	0.336364	0.0110775	0.261312	0.0212044	1.16199	0.921203	0.407672	0.0603855	0.38195	0.0543765
cept-1	0.738549	0.99968	1.56012	0.999945	3.46456	7.47381e-06	2.21675	0.0786084	1.28848	0.677196	2.69669	0.00598307	2.28006	0.0223665
cept-2	0.932981	0.99968	1.1471	0.999945	1.04777	0.941388	0.911362	0.912901	0.724418	0.810544	1.03506	0.957197	1.54784	0.522161
cerk-1	0.97667	0.99968	0.967073	0.999945	0.969427	0.942763	0.990395	0.989442	0.807645	0.817405	0.744207	0.503655	0.99907	0.999055
cest-1.2	1.03544	0.99968	0.505994	0.999945	0.250582	0.00626609	0.500728	0.435385	0.69048	0.80371	0.308064	0.0403494	0.49706	0.437588
cest-10	1.24707	0.99968	0.308883	0.337394	0.457931	0.205829	1.48316	0.679031	0.441916	0.158076	0.161079	0.000100826	0.396544	0.141386
cest-13	1.05324	0.99968	0.469655	0.927331	0.57006	0.151608	1.22359	0.770059	0.668525	0.572696	0.474567	0.0590235	0.77272	0.669834
cest-15	0.91437	0.99968	0.855994	0.999945	1.71734	0.154509	2.03371	0.241411	1.12712	0.954004	0.975698	0.978141	0.918197	0.937029
cest-16	1.18064	0.99968	1.07683	0.999945	1.81358	0.271424	1.72966	0.528989	1.66151	0.670108	1.58491	0.520795	1.03245	0.974894
cest-17	1.64559	0.99968	1.14155	0.999945	1.50169	0.449982	1.34162	0.710714	1.47055	0.758357	1.3173	0.699537	0.968928	0.973523
cest-2.1	1.38096	0.99968	0.433669	0.837187	0.656476	0.323416	1.50414	0.554513	0.651901	0.609937	0.769604	0.602441	1.28889	0.70974
cest-2.2	1.29407	0.99968	0.569965	0.999945	0.573991	0.195303	1.00052	0.999679	0.507617	0.206194	0.324371	0.0131722	0.687987	0.617763
cest-24	0.855949	0.99968	1.6776	0.999945	4.73886	0.000429757	2.73367	0.246317	0.711616	0.655819	4.45141	0.000147016	6.82751	1.43878e-10
cest-25	1.27134	0.99968	1.35079	0.999945	3.03341	0.000752492	2.22798	0.146066	1.05733	0.978292	3.26865	0.00049727	3.36041	0.000670477
cest-26	0.821783	0.99968	1.14635	0.999945	3.23897	0.000165768	2.83693	0.0252987	1.11141	0.953028	3.21422	0.000182654	3.15534	0.000486377
cest-27	1.37976	0.99968	0.817647	0.999945	2.0858	0.0686046	2.59256	0.136534	1.13828	0.955815	2.65549	0.0146065	2.54427	0.0421465
cest-3	1.88288	0.99968	0.84534	0.999945	0.603528	0.490148	0.722733	0.737481	0.796892	0.942354	0.225247	0.0759706	0.313184	0.287493
cest-31	1.32468	0.99968	0.572665	0.999945	0.489868	0.106275	0.879126	0.894626	0.974535	0.989684	0.605152	0.282848	0.674103	0.461765
cest-32	0.741567	0.99968	0.987357	0.999945	2.78694	0.00440744	2.77473	0.101613	0.792716	0.892545	3.44787	0.00112604	4.69554	0.000400402
cest-33	0.736979	0.99968	0.878576	0.999945	1.37386	0.554814	1.55208	0.549805	1.11208	0.968729	0.987562	0.988042	0.965708	0.972589
cest-35.1	1.30495	0.99968	1.404	0.999945	2.81979	0.0225359	2.03296	0.30446	1.69245	0.689453	3.8067	0.00255843	2.47517	0.0865347
cest-4	1.12076	0.99968	0.954756	0.999945	1.32634	0.465547	1.38539	0.581994	0.768418	0.795545	1.00348	0.994859	1.42033	0.500761
cest-5.1	1.24471	0.99968	0.581484	0.999945	1.0287	0.969586	1.78579	0.528942	0.833891	0.958896	1.07544	0.934401	1.40545	0.769086
cest-5.2	1.08646	0.99968	0.783623	0.999945	0.614782	0.265338	0.78941	0.743543	1.04626	0.985145	1.14296	0.807498	1.1903	0.804246
cest-6	1.39001	0.99968	0.697238	0.999945	0.608364	0.351499	0.892688	0.910108	0.896836	0.968729	0.323334	0.0521841	0.386508	0.222881
cest-7	0.991162	0.99968	0.245466	0.552784	0.486008	0.226222	2.03791	0.514516	1.03877	0.989815	0.410422	0.159423	0.418278	0.320647
cest-9.1	1.23857	0.99968	0.383115	0.988699	0.23119	5.994e-05	0.621022	0.589501	0.589651	0.37534	0.192687	0.000116206	0.348276	0.0680642
cest-9.2	1.89481	0.99968	0.739924	0.999945	0.672868	0.588692	0.942263	0.965818	1.42068	0.862731	1.17757	0.849064	0.902317	0.93015
cex-1	0.856102	0.99968	0.728344	0.999945	2.44359	0.000996413	3.29717	0.0181295	0.477327	0.0162451	1.97702	0.0231648	4.51224	7.28355e-08
cex-2	0.9574	0.99968	0.865277	0.999945	1.76749	0.0528615	2.06193	0.141152	1.08341	0.955211	1.50601	0.219937	1.51775	0.312639
cey-1	1.07942	0.99968	1.03411	0.999945	0.92345	0.823409	0.898491	0.853726	3.23701	2.40458e-07	3.07954	1.05585e-05	1.03617	0.93871
cey-2	0.649089	0.99968	1.28022	0.999945	0.107097	1.74254e-12	0.0818395	3.23318e-06	0.617597	0.298619	0.235422	3.66703e-05	0.415903	0.00745103
cey-3	0.770281	0.99968	1.05575	0.999945	0.12284	4.36818e-15	0.114068	1.20762e-05	0.581732	0.0718123	0.193389	2.15176e-07	0.361809	0.0026066
cey-4	0.943916	0.99968	0.750107	0.999945	0.84231	0.689816	1.11696	0.868468	0.787817	0.697775	0.652715	0.207015	0.90132	0.817427
cfim-1	0.825912	0.99968	0.947443	0.999945	0.422245	0.00339482	0.441596	0.104047	0.734976	0.548329	0.490565	0.0216948	0.728261	0.386344
cfim-2	1.03469	0.99968	1.24035	0.999945	0.511386	0.0662351	0.404692	0.150507	0.734795	0.672264	0.611314	0.187543	0.90858	0.878364
cfp-1	0.840247	0.99968	1.20705	0.999945	0.530686	0.0634199	0.432134	0.164956	0.816996	0.815838	0.677209	0.300296	0.903771	0.848531
cgef-1	1.36741	0.99968	1.30854	0.999945	1.10024	0.816733	0.847653	0.788732	1.38864	0.59252	1.2342	0.609372	0.968775	0.957277
cgh-1	0.858165	0.99968	1.24873	0.999945	0.276025	7.20935e-06	0.216015	0.00333382	0.588813	0.103834	0.382141	0.000868811	0.706113	0.330145
cgp-1	0.923011	0.99968	1.10626	0.999945	0.818266	0.587319	0.725009	0.640724	0.84849	0.842692	1.10975	0.808906	1.42794	0.338564
cgr-1	1.0597	0.99968	0.755064	0.999945	0.653242	0.25027	0.885195	0.878169	0.943807	0.973363	0.599545	0.21169	0.690396	0.439375
cgt-1	0.741757	0.99968	0.843115	0.999945	1.63963	0.200767	1.95677	0.241272	0.595933	0.539471	1.81647	0.158806	3.32122	0.00752563
cgt-2	1.5633	0.99968	1.6508	0.999945	2.11883	0.0984498	1.27933	0.72637	1.14177	0.957458	2.13296	0.0995985	2.03666	0.184439
cgt-3	1.17856	0.99968	1.02624	0.999945	1.64191	0.153852	1.60518	0.376787	0.978628	0.988189	1.36075	0.412689	1.51213	0.253052
chaf-1	0.768942	0.99968	1.26804	0.999945	0.260884	1.24312e-06	0.20094	0.00281144	0.766145	0.652909	0.338304	0.000213624	0.481183	0.0305037
chaf-2	0.99227	0.99968	1.24012	0.999945	0.25205	2.44599e-05	0.20086	0.000873838	0.880587	0.921728	0.356633	0.00343938	0.440566	0.048619
chat-1	0.982804	0.99968	1.28021	0.999945	1.52908	0.270143	1.18392	0.791128	1.37992	0.612937	1.30541	0.560379	1.03372	0.950856
chc-1	2.01669	0.755687	1.77428	0.999945	1.42836	0.265575	0.792871	0.715131	1.58939	0.292297	1.48684	0.258348	1.02111	0.974557
chch-3	0.818863	0.99968	0.883125	0.999945	0.871662	0.729311	0.992251	0.989892	0.964543	0.98131	0.80122	0.601349	0.905851	0.839358
chd-1	1.06914	0.99968	1.2926	0.999945	0.733956	0.507911	0.567327	0.283934	0.911238	0.957458	0.849787	0.767189	1.02033	0.972671
chd-3	1.76122	0.99968	2.30898	0.795162	1.99105	0.0768876	0.864182	0.814272	3.20397	0.00211288	1.6141	0.437995	0.545297	0.332131
chd-7	1.62834	0.99968	1.47661	0.999945	1.92332	0.0429841	1.2983	0.637267	1.49396	0.4418	1.91955	0.0738922	1.39973	0.445664
chdp-1	0.938362	0.99968	1.05973	0.999945	0.997123	0.993771	0.937712	0.913085	0.909175	0.924873	1.12655	0.751857	1.3495	0.377951
che-10	1.43705	0.99968	0.71719	0.999945	1.17142	0.709796	1.65854	0.424445	1.68709	0.462446	1.93699	0.1013	1.24758	0.764053
che-14	1.60584	0.99968	1.45216	0.999945	0.372872	0.0612675	0.269243	0.213114	1.72874	0.412312	1.07081	0.927361	0.669462	0.561956
chil-10	1.28943	0.99968	1.44099	0.999945	1.83494	0.131303	1.29084	0.701339	1.67074	0.417909	1.69566	0.258852	1.10676	0.884329
chil-13	1.11248	0.99968	1.21376	0.999945	2.17233	0.0176582	1.79902	0.273357	1.11225	0.953028	1.67005	0.183747	1.63399	0.275649
chil-22	0.573527	0.99968	0.909166	0.999945	1.50816	0.463042	1.66019	0.501595	0.339476	0.361502	1.07193	0.948714	3.54932	0.276422
chil-23	0.954189	0.99968	0.700737	0.999945	0.463407	0.132997	0.678081	0.676044	0.645005	0.753978	0.261832	0.024964	0.454609	0.412884
chil-24	0.74853	0.99968	1.33825	0.999945	3.98377	0.000799847	2.99767	0.0382181	2.30396	0.234643	5.9489	2.21646e-05	2.8219	0.01339
chin-1	0.7458	0.99968	1.16416	0.999945	0.348518	0.00210072	0.29296	0.04771	0.786948	0.76708	0.514497	0.099333	0.714428	0.529692
chk-1	0.883933	0.99968	1.53283	0.999945	0.416835	0.026527	0.266747	0.028672	0.855167	0.900534	0.46043	0.0723047	0.587343	0.272668
chk-2	0.823239	0.99968	0.990998	0.999945	0.306111	0.0103623	0.307367	0.0568731	1.16014	0.938706	0.490291	0.172143	0.458693	0.180063
chl-1	0.843688	0.99968	1.73834	0.999945	0.568216	0.323579	0.321643	0.127	0.81392	0.914435	0.678309	0.50875	0.908853	0.918023
chmp-7	0.96508	0.99968	1.17556	0.999945	0.679129	0.316713	0.572982	0.344548	0.952849	0.979023	0.737683	0.53313	0.840696	0.793851
chn-1	0.798802	0.99968	1.14636	0.999945	0.863942	0.713982	0.746068	0.632581	0.898732	0.918272	0.847555	0.733889	1.02629	0.967952
chp-1	0.792658	0.99968	0.713085	0.999945	0.459979	0.0397956	0.649414	0.452535	0.72204	0.627586	0.613259	0.237794	0.927319	0.896872
chpf-1	0.821431	0.99968	1.07079	0.999945	1.57033	0.201998	1.45275	0.520976	1.0254	0.988094	1.50234	0.288166	1.59929	0.232593
chs-1	0.905802	0.99968	2.28992	0.999945	0.188228	7.47991e-05	0.0785607	0.00240144	0.45304	0.148766	0.201034	0.000578501	0.483258	0.238596
chs-2	2.85301	0.107602	1.0055	0.999945	0.593638	0.393775	0.613871	0.653574	1.35	0.786503	0.883229	0.883319	0.714215	0.694918
cht-1	1.76572	0.99968	1.53039	0.999945	1.23604	0.78874	0.836441	0.883801	3.97263	0.0423751	1.73088	0.455479	0.471695	0.294901
cht-4	1.33904	0.99968	0.567986	0.999945	0.204558	0.0119713	0.370156	0.351705	0.817274	0.899808	0.118612	0.000786063	0.159798	0.0125343
chtl-1	1.42303	0.99968	1.4249	0.999945	1.37877	0.487196	0.954153	0.955587	1.72985	0.454328	1.26859	0.650894	0.793789	0.748908
[truncated: 9,903 more rows]
