# Supplementary material for: Caenorhabditis elegans methionine/S-adenosylmethionine cycle activity is sensed and adjusted by a nuclear hormone receptor
Source: eLife. 2020 Oct 5;9:e60259. doi: 10.7554/eLife.60259 (PMC7561351; doi:10.7554/eLife.60259)
Supplement: Supplementary file 4. — Pacdh-1::GFP on methionine vs. Pacdh-1::GFP untreated; Pacdh-1::GFP;∆nhr-114 untreated vs. Pacdh-1::GFP untreated; Pacdh-1::GFP;∆nhr-114 on methionine vs. Pacdh-1::GFP on methionine; Pacdh-1::GFP;∆nhr-114 on methionine vs. Pacdh-1::GFP;∆nhr-114 untreated. Related to Figures 5 and 6. [file elife-60259-supp4.xlsx]

## Sheet: Sheet1
Gene	Pacdh-1::GFP + Methionine vs. Pacdh-1::GFP Untreated		Pacdh-1::GFP;∆nhr-114 untreated vs. Pacdh-1::GFP untreated		Pacdh-1::GFP∆nhr-114 + Methionine vs. Pacdh-1::GFP + Methionine		Pacdh-1::GFP;∆nhr-114 + Methionine vs. Pacdh-1::GFP∆nhr-114 untreated
	Fold Change	P adjusted	Fold Change	P adjusted	Fold Change	P adjusted	Fold Change	P adjusted
21ur-10126	1.53958	0.999951	1.22239	0.999969	1.08257	0.999983	1.27043	0.999777
21ur-10296	0.967519	0.999951	0.822156	0.999969	0.826948	0.999983	0.980598	0.999777
21ur-10762	0.771541	0.999951	1.07084	0.999969	1.71004	0.999983	1.23954	0.999777
21ur-11480	1.19189	0.999951	1.3052	0.999969	1.50965	0.999983	1.38458	0.999777
21ur-12271	6.06338	0.999951	2.36979	0.999969	0.146526	0.265014	0.36869	0.999777
21ur-12830	0.693512	0.999951	0.803236	0.999969	1.58451	0.999983	1.38551	0.999777
21ur-13227	0.89139	0.999951	0.837922	0.999969	0.997651	0.999983	1.06653	0.999777
21ur-13321	1.07098	0.999951	0.725226	0.999969	0.938658	0.999983	1.38797	0.999777
21ur-14353	6.06676	0.999951	2.51263	0.999969	0.174714	0.736371	0.418164	0.999777
21ur-14779	1.00023	0.999951	0.94026	0.999969	0.843537	0.999983	0.899156	0.999777
21ur-15261	0.819347	0.999951	0.67642	0.999969	1.28043	0.999983	1.60489	0.999777
21ur-2137	0.80875	0.999951	1.77615	0.999969	1.21746	0.999983	0.570131	0.999777
21ur-3118	0.842644	0.999951	0.654405	0.999969	0.946217	0.999983	1.22366	0.999777
21ur-3139	1.0909	0.999951	0.868949	0.999969	0.867313	0.999983	1.08715	0.999777
21ur-3545	0.916773	0.999951	0.785044	0.999969	0.932735	0.999983	1.10031	0.999777
21ur-4739	3.02601	0.999951	0.861952	0.999969	0.0793573	0.0229165	0.275411	0.999777
21ur-6258	0.711999	0.999951	1.71694	0.999969	2.35337	0.999983	0.969213	0.999777
21ur-7970	0.866957	0.999951	1.47188	0.999969	1.44941	0.999983	0.875212	0.999777
21ur-8353	1.02996	0.999951	2.75351	0.999969	1.30016	0.999983	0.488179	0.999777
21ur-8410	0.908882	0.999951	0.695994	0.999969	1.13499	0.999983	1.4921	0.999777
21ur-935	0.734474	0.999951	0.59164	0.999969	1.30851	0.999983	1.6418	0.999777
2RSSE.6	0.733354	0.999951	1.14919	0.999969	1.57652	0.999983	1.0242	0.999777
aagr-1	1.4123	0.999951	0.598778	0.999969	0.668112	0.999983	1.59293	0.999777
aagr-2	1.0125	0.999951	0.709153	0.999969	0.932339	0.999983	1.34115	0.999777
aagr-3	1.08818	0.999951	1.09751	0.999969	1.08934	0.999983	1.0869	0.999777
aagr-4	1.18849	0.999951	0.824531	0.999969	1.00523	0.999983	1.45481	0.999777
aak-1	0.86818	0.999951	0.858733	0.999969	1.28206	0.999983	1.30193	0.999777
aak-2	1.1782	0.999951	1.10514	0.999969	0.910277	0.999983	0.978396	0.999777
aakb-1	0.674371	0.999951	0.74957	0.999969	1.20164	0.999983	1.0869	0.999777
aakb-2	1.69685	0.999951	1.14996	0.999969	0.685213	0.999983	1.01665	0.999777
aakg-1	0.845171	0.999951	0.995108	0.999969	0.974003	0.999983	0.844853	0.999777
aakg-2	1.54831	0.999951	1.02051	0.999969	1.00074	0.999983	1.52677	0.999777
aakg-4	0.685943	0.999951	1.54832	0.999969	1.11282	0.999983	0.509333	0.999777
aakg-5	0.951117	0.999951	1.11714	0.999969	1.01943	0.999983	0.871588	0.999777
aap-1	0.993524	0.999951	1.408	0.999969	1.09513	0.999983	0.774743	0.999777
aars-1	1.01169	0.999951	1.01765	0.999969	0.930447	0.999983	0.928352	0.999777
aars-2	1.16534	0.999951	0.971189	0.999969	0.951749	0.999983	1.14713	0.999777
aass-1	1.31034	0.999951	0.983744	0.999969	0.917473	0.999983	1.23369	0.999777
aat-1	1.08712	0.999951	0.740186	0.999969	0.911763	0.999983	1.34325	0.999777
aat-2	0.560577	0.999951	0.757226	0.999969	1.03217	0.999983	0.769633	0.999777
aat-4	1.01232	0.999951	0.797991	0.999969	1.08224	0.999983	1.35933	0.999777
aat-5	0.733933	0.999951	0.630599	0.999969	0.95065	0.999983	1.13586	0.999777
aat-6	0.977281	0.999951	0.652407	0.999969	1.0662	0.999983	1.60197	0.999777
aat-9	0.982655	0.999951	0.808794	0.999969	0.892248	0.999983	1.08814	0.999777
aatf-1	0.847401	0.999951	0.81699	0.999969	1.14956	0.999983	1.19822	0.999777
abce-1	1.19873	0.999951	0.927815	0.999969	1.12023	0.999983	1.45767	0.999777
abcf-1	1.20357	0.999951	1.03638	0.999969	1.07944	0.999983	1.25971	0.999777
abcf-2	1.07776	0.999951	1.06675	0.999969	0.932319	0.999983	0.94579	0.999777
abcf-3	1.25181	0.999951	1.07892	0.999969	0.95326	0.999983	1.11094	0.999777
abf-2	0.78406	0.999951	1.30431	0.999969	0.773483	0.999983	0.465715	0.999777
abf-5	0.636166	0.999951	1.56089	0.999969	0.885513	0.999983	0.390771	0.999777
abf-6	0.930838	0.999951	1.82268	0.999969	0.846808	0.999983	0.439837	0.988632
abhd-11.2	1.23992	0.999951	0.953353	0.999969	0.84304	0.999983	1.10194	0.999777
abhd-12	0.744603	0.999951	1.01876	0.999969	1.10615	0.999983	0.810732	0.999777
abhd-14	1.01089	0.999951	1.20846	0.999969	0.916536	0.999983	0.771614	0.999777
abhd-3.1	0.891213	0.999951	1.2854	0.999969	0.969622	0.999983	0.675422	0.999777
abhd-3.2	1.6713	0.999951	2.35684	0.999969	1.08688	0.999983	0.779124	0.999777
abhd-5.1	0.997771	0.999951	1.20909	0.999969	0.579131	0.999983	0.480686	0.999777
abhd-5.2	0.900183	0.999951	1.05274	0.999969	0.877507	0.999983	0.752892	0.999777
abi-1	0.93211	0.999951	1.26995	0.999969	1.18462	0.999983	0.867886	0.999777
abl-1	1.13012	0.999951	0.937528	0.999969	0.872026	0.999983	1.06101	0.999777
abt-2	1.19088	0.999951	1.56116	0.999969	0.860869	0.999983	0.666426	0.999777
abt-4	0.883651	0.999951	1.7153	0.999969	1.20039	0.999983	0.629155	0.999777
abtm-1	1.02011	0.999951	0.853826	0.999969	1.05359	0.999983	1.26769	0.999777
abts-1	1.15341	0.999951	0.832967	0.999969	0.863498	0.999983	1.20316	0.999777
abts-2	1.89293	0.999951	1.13945	0.999969	0.600574	0.999983	1.00337	0.999777
abts-3	1.07606	0.999951	0.791775	0.999969	0.59918	0.999983	0.82014	0.999777
abts-4	1.13324	0.999951	1.02676	0.999969	0.739899	0.999983	0.822276	0.999777
abu-1	0.722448	0.999951	0.836157	0.999969	3.55362	0.999983	3.01111	0.999777
abu-10	0.659415	0.999951	1.16226	0.999969	3.1817	0.999983	1.78672	0.999777
abu-11	0.919617	0.999951	0.730423	0.999969	2.24294	0.999983	2.71876	0.962951
abu-12	0.809157	0.999951	0.558883	0.999969	0.938607	0.999983	1.34502	0.999777
abu-13	1.0562	0.999951	0.578136	0.999969	0.665405	0.999983	1.2066	0.999777
abu-14	0.952972	0.999951	0.474686	0.999969	1.20122	0.999983	2.40366	0.999777
abu-15	0.575934	0.999951	0.857485	0.999969	3.76588	0.999983	2.62144	0.999777
abu-6	0.622689	0.999951	0.54969	0.999969	3.68293	0.702816	4.20174	0.284872
abu-7	0.50386	0.999951	0.633243	0.999969	4.63007	0.335931	3.69212	0.683391
abu-8	0.577807	0.999951	0.830243	0.999969	3.08892	0.626679	2.15104	0.999777
AC3.5	1.05541	0.999951	1.00724	0.999969	0.78838	0.999983	0.843223	0.999777
AC8.11	1.04358	0.999951	1.2183	0.999969	0.921714	0.999983	0.808093	0.999777
AC8.12	0.672461	0.999951	0.894757	0.999969	0.955178	0.999983	0.733636	0.999777
AC8.4	1.04358	0.999951	1.2183	0.999969	0.921714	0.999983	0.808093	0.999777
AC8.7	0.667644	0.999951	0.888476	0.999969	0.955178	0.999983	0.733636	0.999777
acaa-2	1.15589	0.999951	0.861287	0.999969	0.736212	0.999983	0.993022	0.999777
acbp-1	0.878082	0.999951	0.605745	0.999969	0.973072	0.999983	1.41914	0.999777
acbp-3	1.30186	0.999951	0.824609	0.999969	0.685212	0.999983	1.08871	0.999777
acbp-5	0.861421	0.999951	1.03922	0.999969	1.14694	0.999983	0.953708	0.999777
acbp-6	1.00343	0.999951	1.21651	0.999969	1.25484	0.999983	1.03406	0.999777
acc-4	1.03334	0.999951	1.05494	0.999969	0.742115	0.999983	0.733456	0.999777
acd-2	0.977307	0.999951	2.17608	0.999969	0.937615	0.999983	0.43371	0.999777
acdh-1	0.304108	0.113762	0.140672	1.26385e-05	0.798544	0.999983	1.73841	0.999777
acdh-10	1.30682	0.999951	0.918599	0.999969	0.73381	0.999983	1.05002	0.999777
acdh-11	1.16019	0.999951	0.983023	0.999969	0.927619	0.999983	1.10078	0.999777
acdh-12	1.11338	0.999951	0.879283	0.999969	1.06874	0.999983	1.36195	0.999777
acdh-13	1.07277	0.999951	0.816546	0.999969	0.997698	0.999983	1.31608	0.999777
acdh-2	0.879368	0.999951	0.999137	0.999969	1.10753	0.999983	0.991967	0.999777
acdh-3	1.04275	0.999951	0.913704	0.999969	0.947037	0.999983	1.08772	0.999777
acdh-5	0.582287	0.999951	0.62434	0.999969	1.54468	0.999983	1.40499	0.999777
acdh-6	0.940677	0.999951	0.569331	0.999969	0.839409	0.999983	1.37126	0.999777
acdh-7	1.26841	0.999951	0.838556	0.999969	0.691546	0.999983	1.05162	0.999777
acdh-8	0.722664	0.999951	0.624865	0.999969	1.23848	0.999983	1.42167	0.999777
acdh-9	1.42749	0.999951	1.04442	0.999969	0.914549	0.999983	1.25926	0.999777
acds-10	0.881594	0.999951	0.82912	0.999969	0.87567	0.999983	0.939405	0.999777
ace-2	0.946798	0.999951	0.879663	0.999969	0.938576	0.999983	1.0457	0.999777
ace-3	0.797971	0.999951	0.994334	0.999969	1.05933	0.999983	0.856001	0.999777
acer-1	1.08839	0.999951	0.901677	0.999969	0.731261	0.999983	0.887825	0.999777
acin-1	0.926345	0.999951	0.842559	0.999969	1.07005	0.999983	1.1871	0.999777
acl-1	0.872944	0.999951	1.52124	0.999969	1.4056	0.999983	0.815905	0.999777
acl-11	0.935909	0.999951	1.07313	0.999969	1.11246	0.999983	0.971479	0.999777
acl-12	0.615463	0.999951	2.82946	0.195935	0.959374	0.999983	0.209099	0.00784
acl-13	1.0011	0.999951	0.686319	0.999969	0.932263	0.999983	1.32352	0.999777
acl-14	0.886216	0.999951	1.30038	0.999969	1.06489	0.999983	0.729763	0.999777
acl-2	0.938964	0.999951	1.40041	0.999969	0.957292	0.999983	0.643255	0.999777
acl-3	0.796806	0.999951	0.907648	0.999969	1.20734	0.999983	1.0637	0.999777
acl-4	1.02993	0.999951	1.4642	0.999969	0.768492	0.999983	0.551635	0.999777
acl-5	1.0042	0.999951	0.75138	0.999969	0.715558	0.999983	0.969194	0.999777
acl-6	0.829102	0.999951	0.947833	0.999969	1.20075	0.999983	1.05332	0.999777
acl-7	1.14161	0.999951	1.35902	0.999969	0.83615	0.999983	0.713459	0.999777
acl-8	1.12661	0.999951	1.09375	0.999969	0.982722	0.999983	1.01577	0.999777
acl-9	0.871835	0.999951	1.30026	0.999969	1.21663	0.999983	0.819797	0.999777
acly-1	1.22696	0.999951	2.62345	0.999969	0.926264	0.999983	0.438935	0.792511
acly-2	1.19443	0.999951	1.49285	0.999969	0.923895	0.999983	0.740518	0.999777
acn-1	1.27598	0.999951	0.839953	0.999969	0.759773	0.999983	1.16138	0.999777
aco-1	1.23369	0.999951	1.11776	0.999969	0.83927	0.999983	0.935903	0.999777
aco-2	1.1051	0.999951	0.738973	0.999969	0.79696	0.999983	1.19457	0.999777
acox-1.1	1.1527	0.999951	0.88983	0.999969	1.08233	0.999983	1.4205	0.999777
acox-1.2	1.85638	0.999951	0.318468	0.613303	0.792809	0.999983	4.65879	0.0814969
acox-1.3	1.20121	0.999951	0.612153	0.999969	1.01965	0.999983	1.99745	0.999777
acox-1.4	1.21236	0.999951	0.578176	0.999969	0.89032	0.999983	1.87394	0.999777
acox-1.5	0.761121	0.999951	0.440575	0.999969	1.32244	0.999983	2.31615	0.999777
acox-1.6	0.935885	0.999951	0.895507	0.999969	1.42721	0.999983	1.49497	0.999777
acox-3	1.63211	0.999951	1.82174	0.999969	1.08011	0.999983	0.977674	0.999777
acp-1	1.0132	0.999951	0.814448	0.999969	0.849888	0.999983	1.06427	0.999777
acp-5	0.939265	0.999951	0.538254	0.999969	0.864167	0.999983	1.51628	0.999777
acp-6	1.73479	0.999951	1.8331	0.999969	0.619828	0.999983	0.59435	0.999777
acp-7	1.38178	0.999951	2.47992	0.999969	0.665585	0.999983	0.37308	0.999777
acr-14	3.26183	0.999951	1.39784	0.999969	0.296028	0.999983	0.685674	0.999777
acr-15	0.962629	0.999951	0.816317	0.999969	0.93475	0.999983	1.10967	0.999777
acr-16	1.53195	0.999951	0.657181	0.999969	0.70509	0.999983	1.65108	0.999777
acr-3	1.82285	0.999951	1.22919	0.999969	0.964717	0.999983	1.44361	0.999777
acr-8	0.959473	0.999951	0.62176	0.999969	0.81196	0.999983	1.26123	0.999777
acs-1	1.06577	0.999951	1.70909	0.999969	0.742459	0.999983	0.465339	0.999777
acs-10	1.15979	0.999951	0.976761	0.999969	0.853007	0.999983	1.01009	0.999777
acs-11	1.65946	0.999951	1.57065	0.999969	0.667073	0.999983	0.711661	0.999777
acs-12	1.0681	0.999951	1.01625	0.999969	0.965142	0.999983	1.0147	0.999777
acs-13	0.98224	0.999951	1.87922	0.999969	0.99832	0.999983	0.522691	0.999777
acs-14	1.24037	0.999951	1.26936	0.999969	1.06852	0.999983	1.07369	0.999777
acs-16	0.646284	0.999951	0.705517	0.999969	1.39462	0.999983	1.30106	0.999777
acs-17	0.965676	0.999951	1.55311	0.999969	0.770702	0.999983	0.482934	0.999777
acs-19	1.23332	0.999951	1.80194	0.999969	0.913917	0.999983	0.629137	0.999777
acs-2	1.01625	0.999951	0.890295	0.999969	0.61975	0.999983	0.713958	0.999777
acs-20	0.809583	0.999951	0.677397	0.999969	0.932874	0.999983	1.11686	0.999777
acs-22	1.10272	0.999951	1.38894	0.999969	1.10943	0.999983	0.884215	0.999777
acs-3	1.97717	0.999951	0.899969	0.999969	0.500222	0.999983	1.11009	0.999777
acs-4	0.810719	0.999951	1.24177	0.999969	1.05242	0.999983	0.689105	0.999777
acs-5	1.06584	0.999951	1.15809	0.999969	0.838909	0.999983	0.778655	0.999777
acs-7	1.65032	0.999951	1.45631	0.999969	1.12295	0.999983	1.28493	0.999777
acsd-1	1.83869	0.999951	0.965551	0.999969	0.556828	0.999983	1.08125	0.999777
act-1	1.01847	0.999951	0.655074	0.999969	0.845688	0.999983	1.32206	0.999777
act-2	1.12327	0.999951	0.835901	0.999969	0.95018	0.999983	1.28111	0.999777
act-3	1.23962	0.999951	0.758293	0.999969	0.777438	0.999983	1.27854	0.999777
act-4	0.996949	0.999951	0.756407	0.999969	0.951822	0.999983	1.26272	0.999777
act-5	0.883706	0.999951	0.664788	0.999969	1.0924	0.999983	1.46078	0.999777
actl-1	0.851561	0.999951	0.819742	0.999969	0.793495	0.999983	0.833781	0.999777
acy-1	0.957101	0.999951	0.906422	0.999969	0.789718	0.999983	0.837081	0.999777
acy-3	1.01009	0.999951	1.00694	0.999969	0.793999	0.999983	0.804763	0.999777
ada-2	0.966215	0.999951	1.04391	0.999969	0.877083	0.999983	0.813666	0.999777
adah-1	0.733023	0.999951	1.23364	0.999969	1.33056	0.999983	0.790402	0.999777
adal-1	0.762665	0.999951	1.38489	0.999969	1.84856	0.999983	1.02116	0.999777
adbp-1	0.82354	0.999951	0.957843	0.999969	1.09416	0.999983	0.94533	0.999777
add-1	1.50079	0.999951	1.22217	0.999969	0.718168	0.999983	0.883551	0.999777
add-2	1.05333	0.999951	1.13666	0.999969	0.807939	0.999983	0.760055	0.999777
adk-1	0.718436	0.999951	0.62145	0.999969	0.831064	0.999983	0.965764	0.999777
adm-2	1.2371	0.999951	1.36792	0.999969	0.922788	0.999983	0.84074	0.999777
adm-4	0.949809	0.999951	0.803857	0.999969	0.898099	0.999983	1.07042	0.999777
adr-1	0.958991	0.999951	0.489476	0.999969	0.945776	0.999983	1.86962	0.999777
adr-2	1.05332	0.999951	1.09913	0.999969	1.00387	0.999983	0.964379	0.999777
ads-1	1.06603	0.999951	0.935006	0.999969	1.11091	0.999983	1.27756	0.999777
adsl-1	1.1231	0.999951	0.662526	0.999969	0.794213	0.999983	1.35327	0.999777
adss-1	0.962425	0.999951	1.35085	0.999969	0.984507	0.999983	0.705464	0.999777
adt-2	1.26601	0.999951	1.16503	0.999969	0.772866	0.999983	0.847199	0.999777
adt-3	0.940451	0.999951	1.12884	0.999969	1.42633	0.999983	1.17203	0.999777
aex-3	0.808067	0.999951	1.02712	0.999969	1.1638	0.999983	0.926055	0.999777
aex-5	1.10509	0.999951	0.833037	0.999969	0.801389	0.999983	1.06754	0.999777
aex-6	0.975715	0.999951	1.04652	0.999969	0.89314	0.999983	0.836949	0.999777
afd-1	1.0165	0.999951	1.14882	0.999969	0.972469	0.999983	0.863473	0.999777
aff-1	0.741507	0.999951	0.669597	0.999969	0.820451	0.999983	0.910329	0.999777
affl-2	0.961589	0.999951	0.947361	0.999969	0.825959	0.999983	0.854817	0.999777
afmd-1	1.22789	0.999951	1.57159	0.999969	1.01184	0.999983	0.798518	0.999777
afmd-2	1.3054	0.999951	0.706011	0.999969	0.742382	0.999983	1.38664	0.999777
age-1	0.96728	0.999951	1.56492	0.999969	1.25037	0.999983	0.777013	0.999777
agef-1	1.20976	0.999951	1.11177	0.999969	0.854964	0.999983	0.934569	0.999777
agl-1	1.74306	0.999951	0.987714	0.999969	0.682044	0.999983	1.21014	0.999777
agmo-1	0.964995	0.999951	0.688702	0.999969	0.906644	0.999983	1.26762	0.999777
agr-1	1.10418	0.999951	1.246	0.999969	0.904689	0.999983	0.803726	0.999777
ags-3	0.800196	0.999951	0.699497	0.999969	0.911497	0.999983	1.05048	0.999777
agt-1	0.869497	0.999951	0.876407	0.999969	1.11288	0.999983	1.10847	0.999777
agxt-1	1.14055	0.999951	0.783327	0.999969	0.835049	0.999983	1.22136	0.999777
AH6.3	1.53614	0.999951	0.786876	0.999969	0.7396	0.999983	1.42014	0.999777
AH9.3	1.21095	0.999951	1.17123	0.999969	0.683083	0.999983	0.709085	0.999777
AH9.6	0.794845	0.999951	0.824498	0.999969	0.885187	0.999983	0.864141	0.999777
aha-1	0.846627	0.999951	0.856474	0.999969	0.900829	0.999983	0.898147	0.999777
ahcy-1	0.480777	0.999951	0.533303	0.999969	0.815695	0.999983	0.740065	0.999777
aho-3	0.959322	0.999951	1.04808	0.999969	1.29333	0.999983	1.18452	0.999777
ahsa-1	1.00352	0.999951	0.697219	0.999969	0.948466	0.999983	1.3719	0.999777
ain-1	0.963892	0.999951	1.0376	0.999969	0.923518	0.999983	0.865425	0.999777
ain-2	1.13189	0.999951	1.1605	0.999969	0.929398	0.999983	0.909742	0.999777
aip-1	1.10837	0.999951	1.32789	0.999969	0.796104	0.999983	0.665248	0.999777
aipl-1	0.963484	0.999951	1.07474	0.999969	1.25265	0.999983	1.12684	0.999777
aipr-1	0.938047	0.999951	1.35997	0.999969	1.17384	0.999983	0.809003	0.999777
air-1	0.856	0.999951	0.910993	0.999969	1.13356	0.999983	1.06681	0.999777
air-2	0.830363	0.999951	1.26094	0.999969	1.35284	0.999983	0.889213	0.999777
ajm-1	1.0143	0.999951	1.0229	0.999969	1.07407	0.999983	1.07018	0.999777
aka-1	0.960782	0.999951	0.910058	0.999969	1.07398	0.999983	1.13932	0.999777
akap-1	0.938039	0.999951	0.995778	0.999969	1.12427	0.999983	1.06165	0.999777
akir-1	0.980894	0.999951	1.13973	0.999969	1.07752	0.999983	0.930531	0.999777
akt-1	0.975194	0.999951	0.859726	0.999969	0.940095	0.999983	1.06971	0.999777
akt-2	0.860686	0.999951	1.11896	0.999969	0.945148	0.999983	0.736253	0.999777
aldo-1	1.05159	0.999951	0.648348	0.999969	0.831398	0.999983	1.35793	0.999777
aldo-2	1.07827	0.999951	1.26351	0.999969	0.861346	0.999983	0.740825	0.999777
alfa-1	1.03999	0.999951	1.3498	0.999969	1.36571	0.999983	1.05469	0.999777
alg-1	1.06318	0.999951	1.0733	0.999969	0.999171	0.999983	0.994275	0.999777
alg-2	1.14359	0.999951	1.03187	0.999969	0.883992	0.999983	0.988239	0.999777
alg-3	0.492875	0.999951	0.631409	0.999969	1.37111	0.999983	1.07457	0.999777
alg-4	0.997048	0.999951	0.609931	0.999969	1.05012	0.999983	1.71639	0.999777
alg-5	0.840848	0.999951	1.38268	0.999969	1.38737	0.999983	0.838697	0.999777
algn-1	0.916467	0.999951	1.07403	0.999969	1.1397	0.999983	0.971527	0.999777
algn-10	0.872794	0.999951	1.01464	0.999969	0.966944	0.999983	0.836159	0.999777
algn-11	0.937658	0.999951	1.09825	0.999969	1.08165	0.999983	0.927715	0.999777
algn-12	1.12573	0.999951	1.34607	0.999969	1.13775	0.999983	0.954075	0.999777
algn-13	0.730161	0.999951	0.948176	0.999969	1.22793	0.999983	0.948712	0.999777
algn-2	0.913707	0.999951	1.042	0.999969	1.1836	0.999983	1.04609	0.999777
algn-3	1.08822	0.999951	0.96569	0.999969	0.950578	0.999983	1.08541	0.999777
algn-5	0.858339	0.999951	0.993634	0.999969	1.12499	0.999983	0.978207	0.999777
algn-6	0.623771	0.999951	1.06926	0.999969	1.64191	0.999983	0.96366	0.999777
algn-7	0.751164	0.999951	1.06914	0.999969	1.18037	0.999983	0.843115	0.999777
algn-8	1.00917	0.999951	1.18033	0.999969	1.05286	0.999983	0.903673	0.999777
algn-9	0.949526	0.999951	1.0976	0.999969	1.20492	0.999983	1.05294	0.999777
alh-1	1.39685	0.999951	0.919304	0.999969	0.909271	0.999983	1.39087	0.999777
alh-10	0.72497	0.999951	0.905307	0.999969	1.10258	0.999983	0.898252	0.999777
alh-11	1.01275	0.999951	0.843566	0.999969	0.89699	0.999983	1.07546	0.999777
alh-12	0.988312	0.999951	0.619622	0.999969	0.946483	0.999983	1.51667	0.999777
alh-13	1.04688	0.999951	0.52332	0.999969	1.05572	0.999983	2.09788	0.999777
alh-3	1.71734	0.999951	1.26488	0.999969	0.797515	0.999983	1.09107	0.999777
alh-4	0.81898	0.999951	1.12309	0.999969	1.24924	0.999983	0.916976	0.999777
alh-5	1.4632	0.999951	1.06373	0.999969	0.748831	0.999983	1.05062	0.999777
alh-6	1.14034	0.999951	0.838241	0.999969	0.875911	0.999983	1.20024	0.999777
alh-7	1.03063	0.999951	0.918452	0.999969	0.933439	0.999983	1.05526	0.999777
alh-8	0.88326	0.999951	0.708888	0.999969	1.00627	0.999983	1.26074	0.999777
alh-9	1.59658	0.999951	0.853977	0.999969	0.650451	0.999983	1.22665	0.999777
alkb-1	1.04355	0.999951	0.876177	0.999969	0.976009	0.999983	1.16566	0.999777
alkb-7	0.754037	0.999951	1.0249	0.999969	1.21925	0.999983	0.902427	0.999777
alkb-8	0.805494	0.999951	1.17938	0.999969	1.20241	0.999983	0.833965	0.999777
allo-1	0.791635	0.999951	2.20686	0.648323	1.16172	0.999983	0.417605	0.607422
alp-1	0.976157	0.999951	0.591094	0.999969	0.943618	0.999983	1.56814	0.999777
alr-1	1.04412	0.999951	1.03737	0.999969	0.863136	0.999983	0.895259	0.999777
alx-1	1.06214	0.999951	1.51955	0.999969	0.904028	0.999983	0.635242	0.999777
aly-1	0.999268	0.999951	0.856276	0.999969	0.810849	0.999983	0.95192	0.999777
aly-2	0.822292	0.999951	0.964855	0.999969	1.34137	0.999983	1.14484	0.999777
aly-3	0.964686	0.999951	0.877745	0.999969	1.04934	0.999983	1.1578	0.999777
ama-1	0.9118	0.999951	1.03681	0.999969	1.16196	0.999983	1.02794	0.999777
aman-1	1.41928	0.999951	0.636742	0.999969	0.739374	0.999983	1.65511	0.999777
aman-2	1.43231	0.999951	1.15166	0.999969	0.730801	0.999983	0.913506	0.999777
aman-3	1.32284	0.999951	1.89238	0.999969	1.16336	0.999983	0.82196	0.999777
ampd-1	0.875392	0.999951	0.855999	0.999969	1.08441	0.999983	1.11379	0.999777
amph-1	0.991527	0.999951	1.0894	0.999969	0.907829	0.999983	0.831413	0.999777
amt-1	0.628541	0.999951	0.78176	0.999969	0.983898	0.999983	0.841359	0.999777
amt-4	0.864268	0.999951	0.472674	0.999969	1.00763	0.999983	1.86229	0.999777
amx-1	0.685286	0.999951	1.19719	0.999969	1.06872	0.999983	0.613006	0.999777
amx-2	0.81302	0.999951	1.26934	0.999969	1.51316	0.999983	0.97014	0.999777
anat-1	0.778885	0.999951	0.85963	0.999969	1.0961	0.999983	0.995233	0.999777
anc-1	1.44973	0.999951	1.57326	0.999969	0.86366	0.999983	0.79799	0.999777
ani-1	1.03436	0.999951	1.06268	0.999969	1.10465	0.999983	1.08055	0.999777
ani-2	1.03255	0.999951	1.24226	0.999969	1.25295	0.999983	1.04408	0.999777
ani-3	0.666468	0.999951	0.763678	0.999969	1.44976	0.999983	1.2687	0.999777
anmt-1	1.05532	0.999951	0.655166	0.999969	0.876946	0.999983	1.42245	0.999777
anmt-2	0.881614	0.999951	0.501522	0.999969	0.900117	0.999983	1.59421	0.999777
anmt-3	1.12725	0.999951	0.831815	0.999969	0.898248	0.999983	1.22373	0.999777
anp-1	0.87619	0.999951	1.08624	0.999969	1.43353	0.999983	1.12859	0.999777
anr-35	1.14522	0.999951	1.41078	0.999969	1.05794	0.999983	0.885755	0.999777
ant-1.1	1.11525	0.999951	0.908546	0.999969	0.831556	0.999983	1.02525	0.999777
ant-1.3	1.05527	0.999951	0.572446	0.999969	0.83187	0.999983	1.54115	0.999777
ant-1.4	0.926036	0.999951	0.52044	0.999969	0.953181	0.999983	1.70637	0.999777
aos-1	0.778084	0.999951	0.802637	0.999969	1.21828	0.999983	1.18582	0.999777
apa-2	1.17387	0.999951	0.882066	0.999969	0.800245	0.999983	1.08215	0.999777
apb-1	1.26069	0.999951	0.970621	0.999969	0.735618	0.999983	0.959641	0.999777
apb-3	1.09267	0.999951	1.02551	0.999969	0.831115	0.999983	0.886557	0.999777
apc-10	0.826209	0.999951	0.806527	0.999969	1.22077	0.999983	1.25294	0.999777
apc-11	0.731376	0.999951	0.958314	0.999969	1.16381	0.999983	0.897839	0.999777
apc-2	0.957266	0.999951	0.947146	0.999969	1.00179	0.999983	1.01513	0.999777
apd-3	0.892266	0.999951	1.22014	0.999969	1.19362	0.999983	0.885477	0.999777
ape-1	1.04208	0.999951	1.21576	0.999969	0.832671	0.999983	0.714611	0.999777
apg-1	1.27253	0.999951	1.1562	0.999969	0.98182	0.999983	1.0856	0.999777
aph-1	0.812355	0.999951	1.14176	0.999969	1.18002	0.999983	0.842567	0.999777
aph-2	0.885162	0.999951	0.812579	0.999969	1.07321	0.999983	1.17638	0.999777
apl-1	0.996198	0.999951	0.962375	0.999969	0.91149	0.999983	0.949499	0.999777
apm-1	1.25805	0.999951	1.05111	0.999969	0.910029	0.999983	1.09679	0.999777
apm-3	1.03234	0.999951	0.730186	0.999969	0.855615	0.999983	1.21743	0.999777
apn-1	0.97358	0.999951	1.23514	0.999969	0.973121	0.999983	0.768723	0.999777
app-1	1.18678	0.999951	0.868564	0.999969	1.13065	0.999983	1.55013	0.999777
apr-1	0.813803	0.999951	1.03311	0.999969	1.03095	0.999983	0.815072	0.999777
aps-1	1.08896	0.999951	1.04526	0.999969	0.97201	0.999983	1.01709	0.999777
aps-2	1.10342	0.999951	0.787782	0.999969	0.835468	0.999983	1.17663	0.999777
aps-3	0.986945	0.999951	0.991097	0.999969	0.993354	0.999983	0.992545	0.999777
aptf-3	0.825616	0.999951	1.61578	0.999969	1.58901	0.999983	0.811421	0.999777
apx-1	0.877612	0.999951	1.55395	0.999969	1.36244	0.999983	0.771141	0.999777
apy-1	0.875702	0.999951	1.16954	0.999969	1.01754	0.999983	0.765755	0.999777
aqp-1	0.86083	0.999951	1.17319	0.999969	1.52699	0.999983	1.12379	0.999777
aqp-10	1.15365	0.999951	1.13535	0.999969	0.984654	0.999983	1.00636	0.999777
aqp-11	0.913226	0.999951	0.901879	0.999969	1.12799	0.999983	1.14902	0.999777
aqp-2	0.933616	0.999951	0.759978	0.999969	0.703532	0.999983	0.8713	0.999777
aqp-4	0.964498	0.999951	0.545179	0.999969	0.809963	0.999983	1.43861	0.999777
aqp-7	1.23612	0.999951	1.09613	0.999969	0.804274	0.999983	0.915323	0.999777
aqp-8	0.997646	0.999951	1.41761	0.999969	0.910872	0.999983	0.658525	0.999777
aqp-9	0.87712	0.999951	0.640445	0.999969	0.904883	0.999983	1.25714	0.999777
arc-1	0.802077	0.999951	1.05781	0.999969	1.05106	0.999983	0.807648	0.999777
arch-1	0.966358	0.999951	1.21785	0.999969	1.28809	0.999983	1.02668	0.999777
ard-1	0.86375	0.999951	0.840625	0.999969	1.09111	0.999983	1.12642	0.999777
arf-1.1	4.19919	0.0945244	34.3444	7.7922e-22	0.25592	0.140957	0.0312968	1.41745e-19
arf-1.2	1.03987	0.999951	0.880871	0.999969	0.828359	0.999983	0.982338	0.999777
arf-3	1.07296	0.999951	0.882134	0.999969	0.904496	0.999983	1.10627	0.999777
arf-6	1.02201	0.999951	1.10265	0.999969	1.14326	0.999983	1.06199	0.999777
argk-1	5.84341	0.521432	12.383	1.42815e-05	2.44062	0.999983	1.12419	0.999777
ari-1.1	0.93226	0.999951	1.2041	0.999969	1.1416	0.999983	0.886277	0.999777
ari-1.2	1.12063	0.999951	1.18578	0.999969	0.973893	0.999983	0.91974	0.999777
ari-1.3	0.968029	0.999951	1.75787	0.999969	1.14806	0.999983	0.633663	0.999777
ari-1.4	0.923987	0.999951	1.06423	0.999969	1.12357	0.999983	0.974391	0.999777
ari-2	0.959598	0.999951	1.19743	0.999969	1.09781	0.999983	0.880776	0.999777
arid-1	1.55004	0.999951	1.73664	0.999969	1.02713	0.999983	0.912449	0.999777
ark-1	1.18433	0.999951	1.0589	0.999969	0.754911	0.999983	0.846211	0.999777
arl-1	0.963647	0.999951	0.875276	0.999969	1.055	0.999983	1.1685	0.999777
arl-3	0.965585	0.999951	1.04317	0.999969	1.04032	0.999983	0.990209	0.999777
arl-5	0.769918	0.999951	1.04784	0.999969	1.23943	0.999983	0.913752	0.999777
arl-8	1.09306	0.999951	1.33732	0.999969	1.10329	0.999983	0.903895	0.999777
arle-14	0.957449	0.999951	1.64168	0.999969	1.25914	0.999983	0.735678	0.999777
arp-1	0.968127	0.999951	1.15601	0.999969	0.985083	0.999983	0.828365	0.999777
arp-11	0.859328	0.999951	0.925786	0.999969	1.13788	0.999983	1.06264	0.999777
arp-6	0.826027	0.999951	1.11152	0.999969	1.19135	0.999983	0.887483	0.999777
arr-1	0.934438	0.999951	0.830443	0.999969	0.885971	0.999983	1.00482	0.999777
arrd-10	1.12096	0.999951	1.21882	0.999969	0.849824	0.999983	0.77386	0.999777
arrd-13	0.717493	0.999951	1.05096	0.999969	1.23105	0.999983	0.851465	0.999777
arrd-14	0.655018	0.999951	0.825616	0.999969	1.00846	0.999983	0.803132	0.999777
arrd-17	1.0861	0.999951	0.983156	0.999969	0.837616	0.999983	0.931053	0.999777
arrd-18	1.1049	0.999951	1.09989	0.999969	0.751367	0.999983	0.76576	0.999777
arrd-19	1.11553	0.999951	1.02361	0.999969	0.866266	0.999983	0.959858	0.999777
arrd-22	1.04338	0.999951	0.679108	0.999969	0.690094	0.999983	1.07333	0.999777
arrd-25	0.890868	0.999951	0.819978	0.999969	0.977868	0.999983	1.07609	0.999777
arrd-26	1.19696	0.999951	0.720209	0.999969	0.768991	0.999983	1.28306	0.999777
arrd-4	1.06854	0.999951	1.05154	0.999969	0.721462	0.999983	0.73852	0.999777
arrd-7	1.04491	0.999951	1.71795	0.999969	1.07352	0.999983	0.653358	0.999777
art-1	1.03816	0.999951	1.23189	0.999969	0.977409	0.999983	0.828527	0.999777
arv-1	0.911277	0.999951	1.18642	0.999969	1.05247	0.999983	0.811691	0.999777
arx-1	0.980478	0.999951	1.05277	0.999969	0.939586	0.999983	0.880406	0.999777
arx-2	0.950982	0.999951	1.04426	0.999969	1.05791	0.999983	0.96828	0.999777
arx-3	1.01671	0.999951	1.1169	0.999969	0.991139	0.999983	0.905664	0.999777
arx-4	0.933971	0.999951	1.06093	0.999969	1.0205	0.999983	0.904174	0.999777
arx-5	0.803487	0.999951	1.06268	0.999969	1.24286	0.999983	0.943617	0.999777
arx-6	0.915164	0.999951	1.14308	0.999969	1.1574	0.999983	0.931733	0.999777
arx-7	0.838429	0.999951	0.966369	0.999969	1.18492	0.999983	1.03429	0.999777
asah-1	1.8452	0.999951	0.783797	0.999969	1.21632	0.999983	2.86247	0.169957
asah-2	1.31819	0.999951	1.20749	0.999969	0.945502	0.999983	1.04025	0.999777
asb-1	1.00376	0.999951	0.909597	0.999969	1.2563	0.999983	1.39224	0.999777
asb-2	1.07489	0.999951	0.720584	0.999969	0.963545	0.999983	1.44682	0.999777
ascc-1	0.855734	0.999951	1.11189	0.999969	0.984114	0.999983	0.762657	0.999777
asd-1	1.26483	0.999951	1.41588	0.999969	0.778119	0.999983	0.696472	0.999777
asd-2	1.10425	0.999951	0.850752	0.999969	0.868688	0.999983	1.13284	0.999777
asfl-1	0.831138	0.999951	1.08363	0.999969	1.27199	0.999983	0.975643	0.999777
asg-1	0.929834	0.999951	0.721924	0.999969	1.03547	0.999983	1.3392	0.999777
asg-2	0.893945	0.999951	0.687383	0.999969	0.785774	0.999983	1.02518	0.999777
ash-2	0.767062	0.999951	1.01223	0.999969	1.28398	0.999983	0.978523	0.999777
asm-1	0.954401	0.999951	1.13695	0.999969	1.04612	0.999983	0.884881	0.999777
asm-2	1.00739	0.999951	0.588892	0.999969	1.06832	0.999983	1.87082	0.999777
asna-1	0.914807	0.999951	1.04287	0.999969	0.930476	0.999983	0.820586	0.999777
asns-1	0.74081	0.999951	0.744467	0.999969	1.71102	0.999983	1.68779	0.999777
asns-2	0.857382	0.999951	1.19914	0.999969	0.762424	0.999983	0.552688	0.999777
asp-1	1.07944	0.999951	0.538955	0.999969	1.24172	0.999983	2.499	0.302006
asp-12	0.275102	0.999951	0.130141	0.0686498	0.54374	0.999983	1.16403	0.999777
asp-13	0.222955	0.0115068	0.154383	8.43312e-05	1.21166	0.999983	1.76123	0.999777
asp-14	1.50789	0.999951	0.621242	0.999969	0.829592	0.999983	2.01685	0.999777
asp-17	0.475134	0.999951	3.6248	0.999969	1.61537	0.999983	0.199204	0.00101333
asp-2	0.623967	0.999951	0.326415	0.102914	0.926142	0.999983	1.77842	0.999777
asp-3	0.995288	0.999951	0.497972	0.999969	0.96016	0.999983	1.92992	0.999777
asp-4	0.889322	0.999951	1.28793	0.999969	0.8604	0.999983	0.597805	0.999777
asp-5	1.02604	0.999951	0.499329	0.999969	0.99907	0.999983	2.06196	0.999777
asp-6	0.874761	0.999951	0.446626	0.945711	0.893112	0.999983	1.75884	0.999777
asp-8	0.751466	0.999951	1.18226	0.999969	1.26958	0.999983	0.813116	0.999777
aspm-1	0.861292	0.999951	0.850195	0.999969	1.23518	0.999983	1.25366	0.999777
asps-1	0.937096	0.999951	0.99888	0.999969	1.09245	0.999983	1.02698	0.999777
ast-1	1.02705	0.999951	0.881352	0.999969	0.665482	0.999983	0.786567	0.999777
atad-3	1.0268	0.999951	0.890518	0.999969	1.08573	0.999983	1.25615	0.999777
atat-2	0.919718	0.999951	0.876847	0.999969	0.635268	0.999983	0.68116	0.999777
ate-1	0.889768	0.999951	1.14778	0.999969	1.2487	0.999983	0.970545	0.999777
atf-2	1.19146	0.999951	0.678248	0.999969	0.568111	0.999983	1.01015	0.999777
atf-4	0.649172	0.999951	0.598364	0.999969	0.898434	0.999983	0.97971	0.999777
atf-6	0.860644	0.999951	0.982769	0.999969	0.867255	0.999983	0.773893	0.999777
atf-7	1.04615	0.999951	0.979728	0.999969	0.967343	0.999983	1.03878	0.999777
atf-8	1.06427	0.999951	0.676335	0.999969	0.505721	0.999983	0.796993	0.999777
atfs-1	0.903516	0.999951	1.38256	0.999969	0.95552	0.999983	0.626642	0.999777
atg-13	0.753202	0.999951	1.02784	0.999969	0.866231	0.999983	0.637705	0.999777
atg-16.1	0.882174	0.999951	1.03662	0.999969	1.01676	0.999983	0.876145	0.999777
atg-16.2	1.06654	0.999951	1.50818	0.999969	0.85233	0.999983	0.608153	0.999777
atg-18	0.811265	0.999951	1.41044	0.999969	1.21666	0.999983	0.702754	0.999777
atg-2	0.778353	0.999951	1.31473	0.999969	1.26106	0.999983	0.751806	0.999777
atg-3	0.846919	0.999951	1.10543	0.999969	1.13251	0.999983	0.870004	0.999777
atg-4.1	0.959164	0.999951	1.09207	0.999969	1.03449	0.999983	0.923862	0.999777
atg-5	1.0003	0.999951	1.13421	0.999969	1.02312	0.999983	0.905627	0.999777
atg-7	1.02873	0.999951	1.06483	0.999969	0.942833	0.999983	0.914143	0.999777
atg-9	0.795842	0.999951	1.32938	0.999969	1.38691	0.999983	0.832631	0.999777
atgl-1	1.19726	0.999951	1.40522	0.999969	0.939761	0.999983	0.805327	0.999777
atgp-1	0.863799	0.999951	1.03176	0.999969	1.1113	0.999983	0.93883	0.999777
atgp-2	0.827606	0.999951	0.842665	0.999969	0.811687	0.999983	0.809688	0.999777
ath-1	1.17255	0.999951	1.07113	0.999969	0.88774	0.999983	0.974768	0.999777
athp-1	1.3615	0.999951	1.02408	0.999969	1.23702	0.999983	1.63965	0.999777
athp-2	0.904235	0.999951	0.927507	0.999969	1.22812	0.999983	1.1958	0.999777
atic-1	1.41436	0.999951	0.392672	0.999969	0.378309	0.999983	1.373	0.999777
atl-1	1.26378	0.999951	1.19498	0.999969	0.841365	0.999983	0.892094	0.999777
atln-1	1.0525	0.999951	1.37023	0.999969	0.893064	0.999983	0.68955	0.999777
atm-1	0.750431	0.999951	1.63267	0.999969	1.73564	0.999983	0.791215	0.999777
atn-1	1.15768	0.999951	0.774952	0.999969	0.82002	0.999983	1.23309	0.999777
atp-1	1.12401	0.999951	0.744559	0.999969	0.906512	0.999983	1.37642	0.999777
atp-2	1.24589	0.999951	0.802625	0.999969	0.761312	0.999983	1.18701	0.999777
atp-3	1.01725	0.999951	0.714665	0.999969	0.912231	0.999983	1.306	0.999777
atp-4	1.06235	0.999951	0.863837	0.999969	0.985825	0.999983	1.21858	0.999777
atp-5	0.885328	0.999951	0.691749	0.999969	0.901468	0.999983	1.16122	0.999777
atp-6	1.05668	0.999951	0.739085	0.999969	0.785482	0.999983	1.12815	0.999777
atrn-1	0.838656	0.999951	0.883795	0.999969	1.16387	0.999983	1.12154	0.999777
attf-2	0.839085	0.999951	0.87365	0.999969	1.15746	0.999983	1.117	0.999777
attf-3	0.639217	0.999951	1.48677	0.999969	1.72417	0.999983	0.741966	0.999777
attf-4	0.896614	0.999951	0.896476	0.999969	0.823261	0.999983	0.829707	0.999777
attf-5	1.13895	0.999951	0.985701	0.999969	0.641723	0.999983	0.7486	0.999777
attf-6	1.31387	0.999951	1.12102	0.999969	1.165	0.999983	1.3624	0.999777
atx-2	1.25256	0.999951	0.95858	0.999969	0.844578	0.999983	1.11198	0.999777
atx-3	0.961698	0.999951	1.3217	0.999969	1.10247	0.999983	0.80566	0.999777
ave-1	0.800775	0.999951	1.00002	0.999969	1.18588	0.999983	0.952662	0.999777
avr-14	1.26916	0.999951	0.837923	0.999969	0.730718	0.999983	1.12048	0.999777
avr-15	2.85685	0.999951	1.475	0.999969	0.308007	0.999983	0.590723	0.999777
axl-1	0.99988	0.999951	1.00819	0.999969	0.686804	0.999983	0.684611	0.999777
B0001.2	1.10129	0.999951	1.54034	0.999969	1.27406	0.999983	0.914692	0.999777
B0001.3	1.02734	0.999951	1.27048	0.999969	1.14165	0.999983	0.928256	0.999777
B0001.4	1.0179	0.999951	1.05214	0.999969	1.01093	0.999983	0.980348	0.999777
B0001.5	0.852287	0.999951	0.933287	0.999969	1.02229	0.999983	0.939092	0.999777
B0001.7	0.776905	0.999951	1.36417	0.999969	1.85589	0.999983	1.06632	0.999777
B0001.8	1.15345	0.999951	1.18333	0.999969	0.892268	0.999983	0.871845	0.999777
B0019.2	0.819004	0.999951	1.42289	0.999969	1.59977	0.999983	0.927272	0.999777
B0024.11	1.10733	0.999951	0.902821	0.999969	1.0264	0.999983	1.26104	0.999777
B0024.13	0.878881	0.999951	1.29803	0.999969	1.17126	0.999983	0.794291	0.999777
B0024.3	1.59152	0.999951	1.08482	0.999969	0.430955	0.999983	0.634626	0.999777
B0024.4	0.559415	0.999951	0.940259	0.999969	1.96114	0.999983	1.18503	0.999777
B0025.4	1.04445	0.999951	1.14403	0.999969	1.03314	0.999983	0.944503	0.999777
B0025.5	1.0788	0.999951	0.722555	0.999969	1.09833	0.999983	1.6252	0.999777
B0025.7	0.813492	0.999951	1.45245	0.999969	1.42206	0.999983	0.796183	0.999777
B0025.8	1.23302	0.999951	0.686049	0.999969	0.82746	0.999983	1.44793	0.999777
B0034.1	0.810224	0.999951	1.35254	0.999969	1.84113	0.999983	1.11185	0.999777
B0035.13	1.11653	0.999951	0.314682	0.865902	0.671086	0.999983	2.40407	0.999777
B0035.15	0.739213	0.999951	0.834341	0.999969	1.24156	0.999983	1.10899	0.999777
B0035.18	0.817573	0.999951	0.881638	0.999969	1.01801	0.999983	0.942232	0.999777
B0035.3	1.07819	0.999951	1.16601	0.999969	1.02673	0.999983	0.950662	0.999777
B0041.11	0.835534	0.999951	1.42665	0.999969	0.84882	0.999983	0.497934	0.999777
B0041.5	1.13178	0.999951	1.25035	0.999969	0.934741	0.999983	0.845104	0.999777
B0041.8	0.563882	0.999951	0.765509	0.999969	1.69376	0.999983	1.2535	0.999777
B0198.3	1.19952	0.999951	0.750082	0.999969	0.742962	0.999983	1.19028	0.999777
B0205.1	1.32692	0.999951	1.2423	0.999969	0.884118	0.999983	0.943851	0.999777
B0205.10	1.30913	0.999951	0.943012	0.999969	0.636454	0.999983	0.871432	0.999777
B0205.12	1.10242	0.999951	0.908444	0.999969	0.847533	0.999983	1.03557	0.999777
B0205.13	0.653882	0.999951	4.4878	0.0222722	0.800007	0.999983	0.116723	4.2689e-06
B0205.4	1.1381	0.999951	0.683083	0.999969	0.659295	0.999983	1.14261	0.999777
B0205.8	0.885032	0.999951	0.921588	0.999969	1.17181	0.999983	1.13266	0.999777
B0205.9	0.823167	0.999951	1.34555	0.999969	1.45356	0.999983	0.893933	0.999777
B0207.1	0.828894	0.999951	0.673205	0.999969	1.42381	0.999983	1.7386	0.999777
B0207.6	0.782645	0.999951	1.10059	0.999969	1.33342	0.999983	0.953035	0.999777
B0207.7	0.666361	0.999951	0.702343	0.999969	1.26383	0.999983	1.2065	0.999777
B0218.5	0.715741	0.999951	0.665571	0.999969	1.25068	0.999983	1.35966	0.999777
B0218.7	0.47464	0.999951	0.667995	0.999969	1.75064	0.999983	1.21051	0.999777
B0222.5	1.04311	0.999951	1.60767	0.999969	0.992231	0.999983	0.658961	0.999777
B0228.1	1.12486	0.999951	2.05136	0.999969	0.700156	0.999983	0.393742	0.999777
B0228.6	0.771892	0.999951	1.04623	0.999969	0.870666	0.999983	0.64738	0.999777
B0228.7	0.75919	0.999951	0.670408	0.999969	0.977245	0.999983	1.11413	0.999777
B0238.11	0.905413	0.999951	0.962112	0.999969	1.17687	0.999983	1.11126	0.999777
B0238.12	1.12259	0.999951	3.71519	0.286167	1.19783	0.999983	0.366356	0.525975
B0238.9	0.895244	0.999951	1.22908	0.999969	1.25047	0.999983	0.909114	0.999777
B0244.10	0.812601	0.999951	1.49789	0.999969	1.30207	0.999983	0.712407	0.999777
B0244.9	0.890634	0.999951	0.728664	0.999969	1.13984	0.999983	1.37865	0.999777
B0250.5	1.3069	0.999951	1.01731	0.999969	0.83509	0.999983	1.08046	0.999777
B0250.8	0.917624	0.999951	0.7345	0.999969	1.05688	0.999983	1.32656	0.999777
B0252.3	1.01323	0.999951	1.13562	0.999969	1.02824	0.999983	0.914913	0.999777
B0252.5	1.22609	0.999951	0.848688	0.999969	0.651737	0.999983	0.93823	0.999777
B0252.8	0.91102	0.999951	0.995128	0.999969	0.819384	0.999983	0.75544	0.999777
B0261.1	1.23408	0.999951	1.02255	0.999969	0.779671	0.999983	0.944853	0.999777
B0261.6	0.727503	0.999951	0.864793	0.999969	1.73447	0.999983	1.42977	0.999777
B0261.7	1.06923	0.999951	1.09592	0.999969	1.2164	0.999983	1.1775	0.999777
B0261.8	1.09626	0.999951	0.722372	0.999969	0.741037	0.999983	1.1325	0.999777
B0272.3	1.45187	0.999951	1.14391	0.999969	0.996127	0.999983	1.27237	0.999777
B0272.4	1.06545	0.999951	0.90636	0.999969	1.04075	0.999983	1.23856	0.999777
B0273.1	0.647531	0.999951	0.626736	0.999969	1.48699	0.999983	1.48761	0.999777
B0280.17	0.800777	0.999951	0.85028	0.999969	1.15209	0.999983	1.07684	0.999777
B0280.7	0.842166	0.999951	0.463587	0.999969	0.945917	0.999983	1.68682	0.999777
B0280.9	0.866391	0.999951	0.866317	0.999969	1.26128	0.999983	1.26506	0.999777
B0281.3	1.79611	0.999951	1.07103	0.999969	0.843411	0.999983	1.41038	0.999777
B0285.3	0.947637	0.999951	1.15368	0.999969	1.042	0.999983	0.857015	0.999777
B0286.1	1.26034	0.999951	0.980676	0.999969	0.800316	0.999983	1.03511	0.999777
B0294.1	0.747341	0.999951	0.651153	0.999969	0.696666	0.999983	0.806708	0.999777
B0302.5	1.02938	0.999951	0.821823	0.999969	0.978831	0.999983	1.23289	0.999777
B0303.11	1.88891	0.999951	1.66714	0.999969	0.594624	0.999983	0.67839	0.999777
B0303.14	1.366	0.999951	1.60578	0.999969	0.781099	0.999983	0.664695	0.999777
B0303.3	1.18243	0.999951	0.993736	0.999969	0.775733	0.999983	0.927013	0.999777
B0303.4	1.26439	0.999951	1.34595	0.999969	1.12926	0.999983	1.06279	0.999777
B0303.7	1.17604	0.999951	1.24358	0.999969	0.862933	0.999983	0.820883	0.999777
B0304.2	0.788068	0.999951	1.07567	0.999969	1.2441	0.999983	0.911496	0.999777
B0310.1	0.881703	0.999951	0.470477	0.999969	0.958517	0.999983	1.81462	0.999777
B0310.2	1.01792	0.999951	1.13793	0.999969	0.980613	0.999983	0.897985	0.999777
B0310.6	1.11407	0.999951	0.725132	0.999969	1.63182	0.999983	2.48816	0.999777
B0334.13	0.495979	0.999951	1.09222	0.999969	4.4889	0.999983	2.19952	0.999777
B0334.3	1.26278	0.999951	1.12995	0.999969	0.785262	0.999983	0.88432	0.999777
B0334.4	0.898559	0.999951	1.08095	0.999969	1.08063	0.999983	0.89985	0.999777
B0334.5	1.04869	0.999951	0.880618	0.999969	1.05246	0.999983	1.25915	0.999777
B0334.6	0.934503	0.999951	0.779918	0.999969	1.20692	0.999983	1.47741	0.999777
B0336.13	0.794676	0.999951	1.15921	0.999969	1.33265	0.999983	0.913551	0.999777
B0336.7	0.950773	0.999951	1.16607	0.999969	1.1667	0.999983	0.954349	0.999777
B0348.2	0.35275	0.999951	1.0247	0.999969	0.938477	0.999983	0.316612	0.308572
B0348.5	1.34368	0.999951	0.495234	0.999969	0.659773	0.999983	1.78976	0.999777
B0353.1	0.705573	0.999951	0.675374	0.999969	0.922469	0.999983	0.957441	0.999777
B0361.2	0.884065	0.999951	1.08162	0.999969	1.19685	0.999983	0.982609	0.999777
B0361.3	0.840074	0.999951	0.971351	0.999969	1.06667	0.999983	0.931068	0.999777
B0361.4	0.951244	0.999951	0.988607	0.999969	1.0328	0.999983	0.996476	0.999777
B0361.6	0.897059	0.999951	1.04614	0.999969	1.2519	0.999983	1.07722	0.999777
B0361.9	1.0069	0.999951	0.720324	0.999969	0.984094	0.999983	1.38508	0.999777
B0365.9	1.65415	0.999951	0.565112	0.999969	0.607667	0.999983	1.80936	0.999777
B0379.1	0.861728	0.999951	0.775917	0.999969	1.0867	0.999983	1.21297	0.999777
B0379.2	0.7462	0.999951	0.705971	0.999969	1.26765	0.999983	1.32817	0.999777
B0379.7	0.861342	0.999951	0.94825	0.999969	1.24793	0.999983	1.10353	0.999777
B0393.3	0.762254	0.999951	1.43938	0.999969	1.60121	0.999983	0.841823	0.999777
B0393.4	1.25387	0.999951	0.883833	0.999969	0.78156	0.999983	1.11097	0.999777
B0393.5	1.75082	0.999951	0.85438	0.999969	0.58838	0.999983	1.21531	0.999777
B0393.6	1.05811	0.999951	1.94894	0.999969	1.5002	0.999983	0.814614	0.999777
B0393.8	0.701365	0.999951	1.17536	0.999969	1.17389	0.999983	0.701544	0.999777
B0393.9	0.806504	0.999951	1.44899	0.999969	1.42633	0.999983	0.791356	0.999777
B0395.3	1.01928	0.999951	0.98728	0.999969	1.07625	0.999983	1.12246	0.999777
B0403.3	0.807378	0.999951	2.24237	0.999969	0.945019	0.999983	0.338596	0.368459
B0403.5	0.770565	0.999951	1.03357	0.999969	1.40733	0.999983	1.03158	0.999777
B0403.6	1.30926	0.999951	1.12705	0.999969	0.697844	0.999983	0.812157	0.999777
B0410.3	0.881381	0.999951	0.551241	0.999969	0.743701	0.999983	1.19511	0.999777
B0416.3	0.662706	0.999951	1.52138	0.999969	1.80961	0.999983	0.788701	0.999777
B0416.5	1.11537	0.999951	0.968538	0.999969	0.964735	0.999983	1.11817	0.999777
B0416.7	0.890098	0.999951	1.2315	0.999969	1.26492	0.999983	0.993294	0.999777
B0432.10	0.714664	0.999951	1.31802	0.999969	1.40475	0.999983	0.764146	0.999777
B0432.11	1.51944	0.999951	0.781388	0.999969	0.648631	0.999983	1.25455	0.999777
B0432.14	0.745965	0.999951	1.11913	0.999969	0.772945	0.999983	0.518448	0.999777
B0432.7	0.944148	0.999951	1.10942	0.999969	0.757845	0.999983	0.642439	0.999777
B0432.9	1.12889	0.999951	1.08898	0.999969	0.860496	0.999983	0.897886	0.999777
B0454.5	0.940055	0.999951	1.08358	0.999969	0.971405	0.999983	0.860786	0.999777
B0454.6	1.14146	0.999951	1.83356	0.999969	1.19349	0.999983	0.764621	0.999777
B0457.2	0.918236	0.999951	1.1666	0.999969	0.935809	0.999983	0.760511	0.999777
B0457.6	1.04262	0.999951	1.63828	0.999969	1.22887	0.999983	0.784739	0.999777
B0462.5	1.23972	0.999951	4.94599	0.00126554	0.928435	0.999983	0.232574	0.00334961
B0464.6	1.00035	0.999951	1.17767	0.999969	1.12913	0.999983	0.961179	0.999777
B0464.9	0.870099	0.999951	1.0171	0.999969	1.08779	0.999983	0.93007	0.999777
B0491.5	0.848001	0.999951	0.754617	0.999969	1.0714	0.999983	1.21354	0.999777
B0491.6	1.0856	0.999951	1.41448	0.999969	0.938299	0.999983	0.719896	0.999777
B0491.7	0.83123	0.999951	0.718579	0.999969	1.16614	0.999983	1.3536	0.999777
B0495.7	1.14126	0.999951	0.967341	0.999969	1.00428	0.999983	1.1917	0.999777
B0495.8	0.921236	0.999951	0.982071	0.999969	1.04748	0.999983	0.98727	0.999777
B0495.9	0.819124	0.999951	0.82771	0.999969	1.02569	0.999983	1.01703	0.999777
B0496.1	0.850004	0.999951	0.58715	0.999969	0.959186	0.999983	1.4009	0.999777
B0496.6	1.17135	0.999951	0.736127	0.999969	0.894935	0.999983	1.41608	0.999777
B0507.1	1.25413	0.999951	0.627052	0.999969	0.831897	0.999983	1.6439	0.999777
B0507.2	0.894322	0.999951	1.29982	0.999969	0.881913	0.999983	0.610487	0.999777
B0507.3	2.3339	0.999951	1.9172	0.999969	0.644138	0.999983	0.784146	0.999777
B0511.11	0.998358	0.999951	0.739698	0.999969	1.01695	0.999983	1.34221	0.999777
B0511.12	1.01909	0.999951	1.27408	0.999969	1.02345	0.999983	0.820845	0.999777
B0511.19	0.778343	0.999951	1.20404	0.999969	1.32445	0.999983	0.853192	0.999777
B0511.2	1.1054	0.999951	1.17062	0.999969	0.906673	0.999983	0.856843	0.999777
B0511.6	0.951971	0.999951	1.04055	0.999969	1.09447	0.999983	1.00615	0.999777
B0511.7	0.67227	0.999951	1.02288	0.999969	1.33166	0.999983	0.887492	0.999777
B0513.4	1.20674	0.999951	1.97477	0.999969	1.17441	0.999983	0.718779	0.999777
B0524.6	0.99101	0.999951	1.15096	0.999969	1.32259	0.999983	1.14334	0.999777
B0545.4	1.43323	0.999951	2.28728	0.999969	1.18416	0.999983	0.722835	0.999777
B0546.3	1.06374	0.999951	0.752892	0.999969	0.467909	0.999983	0.663108	0.999777
B0546.4	0.81699	0.999951	1.52334	0.999969	0.912971	0.999983	0.490587	0.999777
B0563.6	1.23872	0.999951	0.830409	0.999969	0.59496	0.999983	0.89412	0.999777
B0563.7	0.866696	0.999951	1.05276	0.999969	1.36581	0.999983	1.13511	0.999777
B0564.2	0.810345	0.999951	1.22779	0.999969	1.39751	0.999983	0.929947	0.999777
B0564.6	0.828596	0.999951	1.01793	0.999969	1.25653	0.999983	1.02336	0.999777
B0564.7	1.09858	0.999951	0.8299	0.999969	0.930234	0.999983	1.23704	0.999777
B0564.9	0.830787	0.999951	1.01839	0.999969	1.25453	0.999983	1.02388	0.999777
baf-1	0.989718	0.999951	1.18584	0.999969	1.09459	0.999983	0.918613	0.999777
bag-1	0.958504	0.999951	0.799445	0.999969	0.911949	0.999983	1.09612	0.999777
bam-2	0.826407	0.999951	0.91811	0.999969	1.11233	0.999983	1.01718	0.999777
bar-1	1.01308	0.999951	1.12401	0.999969	1.10051	0.999983	1.00972	0.999777
bas-1	1.23749	0.999951	0.880258	0.999969	0.955888	0.999983	1.35327	0.999777
basl-1	0.824082	0.999951	0.677816	0.999969	1.07374	0.999983	1.28122	0.999777
bath-1	1.09209	0.999951	1.08329	0.999969	0.914873	0.999983	0.923738	0.999777
bath-15	0.807834	0.999951	1.08666	0.999969	1.25708	0.999983	0.931877	0.999777
bath-19	1.07286	0.999951	1.13549	0.999969	1.06222	0.999983	0.989299	0.999777
bath-2	0.964136	0.999951	1.05794	0.999969	1.12214	0.999983	1.01947	0.999777
bath-24	1.19904	0.999951	1.02313	0.999969	0.908096	0.999983	1.0665	0.999777
bath-26	0.765001	0.999951	0.976845	0.999969	0.916277	0.999983	0.724235	0.999777
bath-27	1.08203	0.999951	1.19556	0.999969	1.26271	0.999983	1.13541	0.999777
bath-28	0.883815	0.999951	1.11807	0.999969	1.02378	0.999983	0.812182	0.999777
bath-29	0.792124	0.999951	1.13947	0.999969	1.23769	0.999983	0.858713	0.999777
bath-3	1.08926	0.999951	0.978292	0.999969	0.826871	0.999983	0.92217	0.999777
bath-30	0.803837	0.999951	1.15612	0.999969	1.24301	0.999983	0.8626	0.999777
bath-38	1.07112	0.999951	1.0015	0.999969	0.802274	0.999983	0.863803	0.999777
bath-39	1.48582	0.999951	1.32277	0.999969	0.62026	0.999983	0.694131	0.999777
bath-4	0.624467	0.999951	0.927367	0.999969	1.63299	0.999983	1.10127	0.999777
bath-40	0.992751	0.999951	1.11032	0.999969	1.18781	0.999983	1.06507	0.999777
bath-41	0.742474	0.999951	1.17645	0.999969	1.43011	0.999983	0.903673	0.999777
bath-42	0.817816	0.999951	1.0287	0.999969	1.20246	0.999983	0.958333	0.999777
bath-43	0.95151	0.999951	0.900454	0.999969	0.879325	0.999983	0.933891	0.999777
bath-44	0.816311	0.999951	0.931205	0.999969	0.907169	0.999983	0.797254	0.999777
bath-46	1.84785	0.999951	2.46646	0.999969	0.574676	0.999983	0.432071	0.999777
bath-5	0.607966	0.999951	0.988526	0.999969	1.71888	0.999983	1.05913	0.999777
bath-7	1.22107	0.999951	1.35565	0.999969	0.905314	0.999983	0.816881	0.999777
bca-1	1.11904	0.999951	1.14977	0.999969	1.02536	0.999983	1.0068	0.999777
bca-2	0.876095	0.999951	0.537869	0.999969	0.639537	0.999983	1.04897	0.999777
bcas-2	0.923057	0.999951	1.00729	0.999969	1.1093	0.999983	1.02112	0.999777
bcat-1	0.887611	0.999951	0.853348	0.999969	0.856671	0.999983	0.893012	0.999777
bcc-1	1.24681	0.999951	1.09437	0.999969	0.696278	0.999983	0.840198	0.999777
bckd-1A	1.12638	0.999951	1.04755	0.999969	1.073	0.999983	1.16063	0.999777
bckd-1B	1.1011	0.999951	0.877794	0.999969	0.98644	0.999983	1.24231	0.999777
bcl-11	0.654915	0.999951	0.909644	0.999969	1.34376	0.999983	0.963822	0.999777
bcl-7	0.692077	0.999951	1.17009	0.999969	1.32844	0.999983	0.783773	0.999777
bcs-1	0.787443	0.999951	0.959872	0.999969	1.14226	0.999983	0.944296	0.999777
BE0003N10.1	1.08785	0.999951	0.713719	0.999969	0.928316	0.999983	1.41847	0.999777
BE0003N10.6	1.08663	0.999951	0.0697224	0.095295	0.728292	0.999983	11.3745	0.0578392
BE10.1	0.840554	0.999951	0.586045	0.999969	1.0074	0.999983	1.44906	0.999777
bec-1	0.969803	0.999951	1.00272	0.999969	1.01328	0.999983	0.982627	0.999777
bed-1	0.571647	0.999951	0.745434	0.999969	1.24406	0.999983	0.958756	0.999777
bed-2	0.965572	0.999951	1.03801	0.999969	0.783694	0.999983	0.740666	0.999777
bed-3	0.579375	0.999951	0.550506	0.999969	1.01959	0.999983	1.06205	0.999777
ben-1	0.76089	0.999951	0.852479	0.999969	1.09162	0.999983	0.977778	0.999777
best-12	1.80409	0.999951	0.864869	0.999969	0.730432	0.999983	1.49188	0.999777
best-13	0.776164	0.999951	1.07082	0.999969	0.923674	0.999983	0.680982	0.999777
best-14	1.08874	0.999951	0.925715	0.999969	0.792625	0.999983	0.954675	0.999777
best-15	0.794249	0.999951	0.90895	0.999969	1.38821	0.999983	1.21618	0.999777
best-17	1.96459	0.999951	1.82046	0.999969	0.520662	0.999983	0.563328	0.999777
best-18	0.946592	0.999951	1.13706	0.999969	0.789628	0.999983	0.661799	0.999777
best-19	1.09084	0.999951	1.10874	0.999969	0.834164	0.999983	0.827799	0.999777
best-21	0.899171	0.999951	0.818665	0.999969	1.38764	0.999983	1.51591	0.999777
best-22	1.13564	0.999951	1.2102	0.999969	0.998482	0.999983	0.941783	0.999777
best-23	0.714813	0.999951	0.628561	0.999969	0.876286	0.999983	1.00857	0.999777
best-24	1.00308	0.999951	1.41426	0.999969	0.815979	0.999983	0.581631	0.999777
best-25	1.14524	0.999951	0.614886	0.999969	0.500839	0.999983	0.924814	0.999777
best-3	0.753338	0.999951	1.4233	0.999969	1.03619	0.999983	0.563635	0.999777
best-6	1.28864	0.999951	0.585899	0.999969	0.631697	0.999983	1.39523	0.999777
best-9	0.748481	0.999951	0.838151	0.999969	1.21397	0.999983	1.09073	0.999777
bet-1	1.08088	0.999951	1.26454	0.999969	0.990918	0.999983	0.849164	0.999777
bet-2	1.02963	0.999951	0.930325	0.999969	0.666572	0.999983	0.740173	0.999777
bgal-1	0.858049	0.999951	0.685266	0.999969	0.84952	0.999983	1.07068	0.999777
bgal-2	1.06777	0.999951	0.985471	0.999969	1.03558	0.999983	1.12763	0.999777
bicd-1	1.21128	0.999951	1.03098	0.999969	1.00622	0.999983	1.18937	0.999777
bigr-1	1.48899	0.999951	1.22578	0.999969	0.674012	0.999983	0.826581	0.999777
bir-1	0.765252	0.999951	0.868475	0.999969	1.32629	0.999983	1.17105	0.999777
bir-2	0.695465	0.999951	1.28563	0.999969	1.40831	0.999983	0.764457	0.999777
bkip-1	1.06608	0.999951	0.813581	0.999969	0.719402	0.999983	0.949314	0.999777
bli-1	1.78862	0.999951	0.710309	0.999969	0.588946	0.999983	1.49377	0.999777
bli-2	1.52237	0.999951	0.548518	0.999969	0.67769	0.999983	1.89403	0.999777
bli-3	0.914178	0.999951	0.713381	0.999969	0.850762	0.999983	1.1033	0.999777
bli-4	1.19992	0.999951	1.07469	0.999969	0.995961	0.999983	1.11868	0.999777
bli-5	0.963299	0.999951	0.596693	0.999969	1.01451	0.999983	1.62206	0.999777
bli-6	1.18753	0.999951	0.54586	0.999969	0.925036	0.999983	2.01029	0.999777
blmp-1	0.922469	0.999951	0.736292	0.999969	0.774329	0.999983	0.977405	0.999777
blos-1	0.777125	0.999951	1.00538	0.999969	1.26007	0.999983	0.98012	0.999777
blos-2	0.627048	0.999951	0.995532	0.999969	1.59734	0.999983	1.01209	0.999777
blos-4	0.65246	0.999951	1.11699	0.999969	1.56583	0.999983	0.914502	0.999777
blos-7	0.98535	0.999951	1.26187	0.999969	1.10421	0.999983	0.862968	0.999777
blos-9	0.968443	0.999951	0.969866	0.999969	1.1037	0.999983	1.10421	0.999777
bmk-1	0.828466	0.999951	0.958302	0.999969	1.13097	0.999983	0.971501	0.999777
bmy-1	1.07304	0.999951	1.05547	0.999969	0.891783	0.999983	0.912237	0.999777
bpl-1	1.42598	0.999951	1.06072	0.999969	0.531243	0.999983	0.710591	0.999777
bpnt-1	1.01524	0.999951	0.83314	0.999969	0.974186	0.999983	1.19452	0.999777
bra-1	0.960794	0.999951	1.13918	0.999969	0.909053	0.999983	0.772705	0.999777
bra-2	0.932208	0.999951	1.1494	0.999969	1.11209	0.999983	0.904198	0.999777
brap-2	0.852453	0.999951	1.07561	0.999969	1.21603	0.999983	0.970447	0.999777
brc-1	1.00241	0.999951	1.03576	0.999969	1.25723	0.999983	1.21712	0.999777
brc-2	0.82946	0.999951	1.10115	0.999969	1.18991	0.999983	0.899493	0.999777
brd-1	1.24416	0.999951	1.13072	0.999969	0.919008	0.999983	1.01133	0.999777
bre-1	1.11309	0.999951	0.72767	0.999969	0.896863	0.999983	1.38047	0.999777
bre-3	0.988034	0.999951	1.31478	0.999969	1.13548	0.999983	0.855126	0.999777
bre-4	0.908011	0.999951	0.90914	0.999969	0.928802	0.999983	0.933321	0.999777
bre-5	0.887823	0.999951	1.10011	0.999969	1.17612	0.999983	0.956255	0.999777
brf-1	0.694405	0.999951	0.912047	0.999969	1.29615	0.999983	0.991293	0.999777
bris-1	1.1216	0.999951	1.46427	0.999969	0.879192	0.999983	0.674302	0.999777
brp-1	0.84919	0.999951	1.28355	0.999969	0.930006	0.999983	0.619079	0.999777
btb-14	0.716898	0.999951	0.71409	0.999969	1.03147	0.999983	1.04915	0.999777
btb-16	0.837646	0.999951	1.08318	0.999969	1.47688	0.999983	1.14999	0.999777
btb-19	0.664452	0.999951	1.02166	0.999969	1.5455	0.999983	1.00704	0.999777
btb-2	0.753929	0.999951	0.527152	0.999969	0.934196	0.999983	1.35391	0.999777
btb-20	1.10603	0.999951	0.883357	0.999969	1.01688	0.999983	1.2688	0.999777
btb-4	1.01732	0.999951	1.2518	0.999969	1.15792	0.999983	0.943816	0.999777
btb-9	0.854492	0.999951	1.05087	0.999969	1.3224	0.999983	1.0899	0.999777
btbd-10	0.874674	0.999951	0.986591	0.999969	1.02134	0.999983	0.908191	0.999777
btf-1	1.22972	0.999951	0.981212	0.999969	0.994851	0.999983	1.25105	0.999777
bub-1	1.03791	0.999951	1.11381	0.999969	1.23685	0.999983	1.15495	0.999777
bub-3	1.16428	0.999951	1.23501	0.999969	1.1521	0.999983	1.09103	0.999777
bud-31	0.894017	0.999951	0.916448	0.999969	1.21607	0.999983	1.19018	0.999777
bus-12	1.24128	0.999951	0.527435	0.999969	0.857527	0.999983	2.03633	0.999777
bus-17	0.91468	0.999951	0.497853	0.999969	0.824044	0.999983	1.52913	0.999777
bus-18	1.09745	0.999951	0.836898	0.999969	0.656841	0.999983	0.882899	0.999777
bus-19	0.71347	0.999951	0.802257	0.999969	1.06155	0.999983	0.943922	0.999777
bus-2	0.842572	0.999951	0.968388	0.999969	0.826801	0.999983	0.721361	0.999777
bus-4	0.94054	0.999951	0.55041	0.999969	0.952761	0.999983	1.59338	0.999777
bus-8	1.13369	0.999951	0.807473	0.999969	0.774796	0.999983	1.09297	0.999777
byn-1	1.00717	0.999951	1.06684	0.999969	1.05233	0.999983	0.996794	0.999777
C01A2.2	1.00321	0.999951	0.483074	0.999969	0.631958	0.999983	1.32559	0.999777
C01A2.4	1.07057	0.999951	1.7132	0.999969	1.04361	0.999983	0.648951	0.999777
C01B10.11	0.992125	0.999951	0.9856	0.999969	0.931663	0.999983	0.93867	0.999777
C01B10.3	0.910408	0.999951	1.17766	0.999969	1.23501	0.999983	0.95911	0.999777
C01B10.6	1.0194	0.999951	0.937208	0.999969	1.00043	0.999983	1.09409	0.999777
C01B10.8	1.09692	0.999951	1.02779	0.999969	1.04327	0.999983	1.11979	0.999777
C01B10.9	1.03882	0.999951	1.17087	0.999969	1.00551	0.999983	0.894175	0.999777
C01B12.8	0.789528	0.999951	1.14692	0.999969	1.44983	0.999983	0.993018	0.999777
C01B4.6	1.37231	0.999951	1.20543	0.999969	0.849158	0.999983	0.992239	0.999777
C01B4.7	0.909714	0.999951	0.911346	0.999969	0.802276	0.999983	0.810947	0.999777
C01B4.8	0.8368	0.999951	1.07388	0.999969	0.863785	0.999983	0.683769	0.999777
C01C10.2	1.37125	0.999951	1.13003	0.999969	0.780118	0.999983	0.943293	0.999777
C01C4.3	0.840803	0.999951	0.975867	0.999969	1.02579	0.999983	0.90341	0.999777
C01F1.3	1.30978	0.999951	0.836091	0.999969	0.695282	0.999983	1.12344	0.999777
C01F1.5	1.60388	0.999951	0.507984	0.999969	0.655246	0.999983	2.09505	0.999777
C01F1.6	1.06793	0.999951	1.25445	0.999969	1.03249	0.999983	0.876309	0.999777
C01F6.14	1.14259	0.999951	1.1299	0.999969	0.956209	0.999983	0.98318	0.999777
C01F6.2	0.718909	0.999951	1.13052	0.999969	1.44413	0.999983	0.913904	0.999777
C01F6.9	0.990012	0.999951	0.808277	0.999969	1.0286	0.999983	1.2672	0.999777
C01G10.14	0.75826	0.999951	0.617478	0.999969	1.09975	0.999983	1.33108	0.999777
C01G10.17	0.541832	0.999951	2.44676	0.999969	1.06669	0.999983	0.240441	0.396085
C01G10.4	0.74345	0.999951	2.17219	0.999969	0.788438	0.999983	0.280503	0.350585
C01G10.6	0.657936	0.999951	0.688428	0.999969	1.01899	0.999983	1.03544	0.999777
C01G10.7	0.763575	0.999951	1.12483	0.999969	1.32972	0.999983	0.905698	0.999777
C01G10.9	1.31206	0.999951	0.731635	0.999969	0.591227	0.999983	1.06513	0.999777
C01G12.3	0.891448	0.999951	0.778243	0.999969	1.22891	0.999983	1.38433	0.999777
C01G5.25	0.947542	0.999951	0.903489	0.999969	0.740286	0.999983	0.779348	0.999777
C01G5.5	0.994782	0.999951	1.46802	0.999969	1.16567	0.999983	0.792392	0.999777
C01G5.9	1.28789	0.999951	0.87581	0.999969	0.979453	0.999983	1.47424	0.999777
C01G6.2	0.884233	0.999951	0.791713	0.999969	1.17775	0.999983	1.28685	0.999777
C01G6.3	0.858168	0.999951	4.0644	0.999969	2.28235	0.999983	0.454417	0.999777
C01G6.4	0.894729	0.999951	1.32192	0.999969	1.12788	0.999983	0.765713	0.999777
C01G6.5	0.915908	0.999951	1.22532	0.999969	0.964504	0.999983	0.724085	0.999777
C01G8.1	0.921597	0.999951	1.78732	0.999969	1.22921	0.999983	0.629496	0.999777
C01H6.4	1.10849	0.999951	1.12954	0.999969	0.923589	0.999983	0.921385	0.999777
C01H6.8	1.29975	0.999951	0.686205	0.999969	0.763713	0.999983	1.45959	0.999777
C02B10.3	1.18822	0.999951	0.720961	0.999969	0.816693	0.999983	1.35096	0.999777
C02B10.4	0.965768	0.999951	1.1306	0.999969	1.26372	0.999983	1.08383	0.999777
C02B10.5	1.2012	0.999951	1.22959	0.999969	0.844107	0.999983	0.828036	0.999777
C02B10.6	0.875413	0.999951	0.678199	0.999969	1.19693	0.999983	1.54481	0.999777
C02B8.3	0.880358	0.999951	1.71351	0.999969	1.35462	0.999983	0.702782	0.999777
C02B8.6	0.738197	0.999951	1.40538	0.999969	1.1579	0.999983	0.618907	0.999777
C02D5.2	1.33354	0.999951	0.741759	0.999969	0.707331	0.999983	1.28576	0.999777
C02D5.4	1.07792	0.999951	1.01474	0.999969	0.861286	0.999983	0.922338	0.999777
C02E7.6	0.769948	0.999951	0.501528	0.999969	1.14737	0.999983	1.76248	0.999777
C02E7.7	0.717448	0.999951	0.581955	0.999969	1.96097	0.999983	2.41222	0.999777
C02F12.8	1.05023	0.999951	1.67541	0.999969	0.778684	0.999983	0.496997	0.999777
C02F4.4	1.37684	0.999951	1.06495	0.999969	0.771394	0.999983	1.00535	0.999777
C02F5.10	0.464556	0.999951	0.809323	0.999969	1.759	0.999983	1.03054	0.999777
C02F5.13	0.779193	0.999951	1.17824	0.999969	1.22444	0.999983	0.810958	0.999777
C02F5.14	1.50178	0.999951	0.395797	0.999969	0.647226	0.999983	2.47239	0.999777
C02F5.3	0.948433	0.999951	0.873631	0.999969	1.03654	0.999983	1.13136	0.999777
C02F5.5	0.991827	0.999951	0.851647	0.999969	1.21325	0.999983	1.3979	0.999777
C03A3.1	1.84101	0.999951	1.03823	0.999969	0.497598	0.999983	0.888677	0.999777
C03A3.2	0.991533	0.999951	0.770091	0.999969	0.928634	0.999983	1.20221	0.999777
C03A3.9	0.901581	0.999951	0.704612	0.999969	1.01409	0.999983	1.31535	0.999777
C03B1.14	1.04122	0.999951	1.49006	0.999969	1.34653	0.999983	0.959685	0.999777
C03B8.2	0.544765	0.999951	0.786722	0.999969	2.1564	0.999983	1.51135	0.999777
C03B8.3	0.625505	0.999951	0.876255	0.999969	1.44661	0.999983	1.02809	0.999777
C03B8.6	4.74866	0.999951	3.07247	0.999969	0.264873	0.999983	0.402467	0.999777
C03C10.2	0.772042	0.999951	0.852178	0.999969	1.19833	0.999983	1.05395	0.999777
C03C11.1	0.73885	0.999951	0.833298	0.999969	1.39798	0.999983	1.21231	0.999777
C03D6.1	1.22809	0.999951	0.729897	0.999969	0.578793	0.999983	0.983785	0.999777
C03F11.4	0.90205	0.999951	1.02002	0.999969	1.05533	0.999983	0.940193	0.999777
C03G6.17	0.928276	0.999951	1.68348	0.999969	0.854653	0.999983	0.488983	0.999777
C03H12.1	1.35359	0.999951	1.34423	0.999969	0.927405	0.999983	0.932291	0.999777
C03H5.10	1.14985	0.999951	0.873967	0.999969	0.94723	0.999983	1.2528	0.999777
C03H5.3	0.84298	0.999951	0.823502	0.999969	1.36888	0.999983	1.4054	0.999777
C03H5.5	0.961341	0.999951	0.68395	0.999969	1.00146	0.999983	1.41656	0.999777
C03H5.6	0.82239	0.999951	0.793554	0.999969	0.876947	0.999983	0.916993	0.999777
C04A11.1	0.800458	0.999951	0.782338	0.999969	1.26744	0.999983	1.26078	0.999777
C04B4.2	0.658277	0.999951	5.02924	0.999969	3.82246	0.999983	0.471787	0.999777
C04C11.23	0.97686	0.999951	1.14547	0.999969	0.999391	0.999983	0.858554	0.999777
C04C3.14	0.839768	0.999951	5.01628	0.691367	0.854049	0.999983	0.143727	0.00190301
C04E12.2	1.06486	0.999951	0.729599	0.999969	0.932222	0.999983	1.36969	0.999777
C04E12.4	1.51954	0.999951	1.64101	0.999969	0.719411	0.999983	0.704247	0.999777
C04E6.11	0.96555	0.999951	1.15272	0.999969	1.35174	0.999983	1.14011	0.999777
C04E6.13	0.859682	0.999951	1.30563	0.999969	0.984185	0.999983	0.652269	0.999777
C04E6.5	0.754354	0.999951	0.894936	0.999969	1.48838	0.999983	1.25216	0.999777
C04E6.7	0.86607	0.999951	1.24301	0.999969	1.17387	0.999983	0.827936	0.999777
C04E7.3	0.975234	0.999951	0.86687	0.999969	0.902878	0.999983	1.02599	0.999777
C04F1.1	1.26695	0.999951	1.4658	0.999969	0.587787	0.999983	0.498979	0.999777
C04F12.1	1.02065	0.999951	1.73529	0.999969	1.01231	0.999983	0.596633	0.999777
C04F12.12	0.889654	0.999951	0.90542	0.999969	1.19264	0.999983	1.14975	0.999777
C04F12.5	0.905271	0.999951	0.99111	0.999969	0.963439	0.999983	0.882587	0.999777
C04F12.7	0.94387	0.999951	1.07608	0.999969	1.43089	0.999983	1.24981	0.999777
C04F12.8	1.01355	0.999951	1.38347	0.999969	1.36311	0.999983	1.00112	0.999777
C04F5.8	1.0121	0.999951	1.08087	0.999969	1.0464	0.999983	0.98228	0.999777
C04F5.9	0.81146	0.999951	1.20838	0.999969	1.20634	0.999983	0.811363	0.999777
C04G2.10	1.11424	0.999951	0.713293	0.999969	0.769461	0.999983	1.22168	0.999777
C04G2.14	0.833708	0.999951	0.897577	0.999969	0.754504	0.999983	0.721175	0.999777
C04G2.9	0.908655	0.999951	0.640329	0.999969	1.11896	0.999983	1.58329	0.999777
C04G6.10	0.592223	0.999951	0.66096	0.999969	2.45568	0.999983	2.0513	0.999777
C04G6.15	1.16165	0.999951	1.31388	0.999969	1.0483	0.999983	0.905073	0.999777
C04G6.2	1.73136	0.999951	0.23535	0.999969	0.879617	0.999983	6.33303	0.582254
C04G6.4	1.05037	0.999951	1.10471	0.999969	0.914395	0.999983	0.872859	0.999777
C04G6.5	0.994483	0.999951	1.19631	0.999969	1.1498	0.999983	0.970104	0.999777
C04G6.7	0.696144	0.999951	0.603162	0.999969	2.0868	0.999983	2.22546	0.999777
C04H5.1	0.904464	0.999951	0.728174	0.999969	1.417	0.999983	1.77101	0.999777
C05A9.2	0.98211	0.999951	1.02737	0.999969	0.73025	0.999983	0.703955	0.999777
C05B5.12	0.99904	0.999951	1.15706	0.999969	1.08364	0.999983	0.920397	0.999777
C05B5.2	0.958195	0.999951	1.1351	0.999969	1.29838	0.999983	1.07654	0.999777
C05B5.4	1.15684	0.999951	1.1135	0.999969	0.862654	0.999983	0.927632	0.999777
C05B5.8	0.985678	0.999951	1.07492	0.999969	0.884185	0.999983	0.811792	0.999777
C05C10.2	0.759592	0.999951	0.985507	0.999969	1.51185	0.999983	1.17329	0.999777
C05C10.3	1.3134	0.999951	1.06813	0.999969	1.09478	0.999983	1.35483	0.999777
C05C10.5	0.711388	0.999951	2.67044	0.999969	2.26356	0.999983	0.598599	0.999777
C05C10.7	0.787685	0.999951	1.01418	0.999969	1.81975	0.999983	1.41712	0.999777
C05C12.1	1.75728	0.999951	1.03246	0.999969	0.605861	0.999983	1.00176	0.999777
C05C12.4	1.15197	0.999951	1.11468	0.999969	1.09347	0.999983	1.13612	0.999777
C05C12.5	0.776494	0.999951	0.686335	0.999969	1.2534	0.999983	1.3974	0.999777
C05C12.6	1.21336	0.999951	1.15263	0.999969	0.845278	0.999983	0.891459	0.999777
C05C8.1	0.672984	0.999951	1.0115	0.999969	1.30552	0.999983	0.877696	0.999777
C05C8.5	0.898322	0.999951	1.04754	0.999969	1.10505	0.999983	0.949717	0.999777
C05C8.7	0.982159	0.999951	0.931822	0.999969	0.989128	0.999983	1.05247	0.999777
C05C9.1	1.21439	0.999951	0.513199	0.999969	0.937322	0.999983	2.26923	0.999777
C05C9.3	1.40231	0.999951	1.35066	0.999969	0.746266	0.999983	0.773296	0.999777
C05D10.4	0.758061	0.999951	0.724742	0.999969	1.31602	0.999983	1.38682	0.999777
C05D11.1	0.890418	0.999951	0.897417	0.999969	1.26134	0.999983	1.26023	0.999777
C05D11.13	0.780944	0.999951	1.00046	0.999969	1.09314	0.999983	0.85769	0.999777
C05D11.5	1.26562	0.999951	1.865	0.999969	0.935561	0.999983	0.638759	0.999777
C05D12.1	1.16331	0.999951	0.972321	0.999969	0.911387	0.999983	1.095	0.999777
C05D12.3	1.09983	0.999951	0.670489	0.999969	1.2224	0.999983	2.02411	0.999777
C05D12.7	0.699356	0.999951	0.748211	0.999969	0.908437	0.999983	0.870517	0.999777
C05D2.10	0.837238	0.999951	1.21856	0.999969	1.1564	0.999983	0.797068	0.999777
C05D2.11	0.842524	0.999951	0.956433	0.999969	1.10701	0.999983	0.992645	0.999777
C05D2.8	1.02461	0.999951	1.09801	0.999969	0.933195	0.999983	0.87622	0.999777
C05D9.12	0.903334	0.999951	0.947166	0.999969	1.31312	0.999983	1.22619	0.999777
C05D9.7	0.95573	0.999951	0.96713	0.999969	0.664801	0.999983	0.670414	0.999777
C05D9.9	1.22528	0.999951	1.41951	0.999969	1.05803	0.999983	0.929551	0.999777
C05E11.3	0.948104	0.999951	0.751074	0.999969	0.874272	0.999983	1.10388	0.999777
C05E7.1	1.12288	0.999951	0.549222	0.999969	0.874638	0.999983	1.75602	0.999777
C05E7.2	0.553997	0.999951	0.667255	0.999969	3.56116	0.697014	2.92165	0.999777
C05G5.1	1.05485	0.999951	0.974516	0.999969	0.855703	0.999983	0.929567	0.999777
C05G5.3	1.49103	0.999951	1.27933	0.999969	0.773999	0.999983	0.896906	0.999777
C05G5.7	1.31283	0.999951	0.812631	0.999969	0.739516	0.999983	1.20263	0.999777
C06A1.12	1.01412	0.999951	1.27923	0.999969	1.40263	0.999983	1.11088	0.999777
C06A1.2	0.946617	0.999951	0.602738	0.999969	0.958812	0.999983	1.51764	0.999777
C06A1.3	0.895297	0.999951	0.693868	0.999969	1.09581	0.999983	1.40528	0.999777
C06A1.7	0.682351	0.999951	0.980441	0.999969	2.54576	0.999983	1.73672	0.999777
C06A12.3	0.821194	0.999951	0.980161	0.999969	0.967821	0.999983	0.815464	0.999777
C06A5.12	1.00132	0.999951	1.57933	0.999969	0.777359	0.999983	0.494688	0.999777
C06A5.3	0.897786	0.999951	1.24681	0.999969	1.1235	0.999983	0.810848	0.999777
C06A5.8	0.65482	0.999951	1.35961	0.999969	1.63411	0.999983	0.775691	0.999777
C06A6.2	0.829025	0.999951	0.273359	0.999969	0.207166	0.2109	0.637096	0.999777
C06A6.4	1.00829	0.999951	1.46471	0.999969	1.49288	0.999983	1.03165	0.999777
C06A6.7	1.15523	0.999951	1.24206	0.999969	1.10931	0.999983	1.01216	0.999777
C06A8.6	0.962201	0.999951	0.82175	0.999969	1.01808	0.999983	1.1795	0.999777
C06A8.8	0.810407	0.999951	0.885727	0.999969	1.16768	0.999983	1.07249	0.999777
C06B3.6	1.04068	0.999951	1.72823	0.999969	0.784079	0.999983	0.476675	0.999777
C06B3.7	1.34172	0.999951	2.40225	0.999969	1.04736	0.999983	0.57742	0.999777
C06B8.2	0.964263	0.999951	2.14584	0.999969	1.35858	0.999983	0.598448	0.999777
C06B8.7	1.52889	0.999951	0.901624	0.999969	0.760443	0.999983	1.30022	0.999777
C06C3.10	0.790964	0.999951	0.974829	0.999969	1.24319	0.999983	1.0196	0.999777
C06C3.4	1.41882	0.999951	1.04595	0.999969	0.54895	0.999983	0.752133	0.999777
C06E1.1	0.856947	0.999951	1.95172	0.999969	0.876903	0.999983	0.3948	0.962951
C06E1.7	0.648701	0.999951	0.851804	0.999969	1.46022	0.999983	1.09623	0.999777
C06E1.9	0.870441	0.999951	1.05598	0.999969	1.23089	0.999983	1.01239	0.999777
C06E2.1	0.854897	0.999951	0.845739	0.999969	1.73093	0.999983	1.72735	0.999777
C06E2.5	0.979565	0.999951	1.45906	0.999969	1.22084	0.999983	0.819344	0.999777
C06E4.2	1.09874	0.999951	0.817446	0.999969	0.923852	0.999983	1.25139	0.999777
C06E7.2	1.00756	0.999951	1.21426	0.999969	0.951193	0.999983	0.79013	0.999777
C06E7.4	0.903233	0.999951	0.68542	0.999969	0.766421	0.999983	1.00507	0.999777
C06E8.5	0.871219	0.999951	1.26686	0.999969	3.60604	0.999983	2.52089	0.999777
C06G1.1	0.877372	0.999951	0.684355	0.999969	1.23641	0.999983	1.57887	0.999777
C06G1.2	1.4485	0.999951	0.318418	0.999969	0.508244	0.999983	2.2418	0.999777
C06G3.6	1.1153	0.999951	0.967237	0.999969	1.08397	0.999983	1.26188	0.999777
C06G3.8	1.21213	0.999951	0.936128	0.999969	0.929908	0.999983	1.20506	0.999777
C06G4.4	0.943911	0.999951	0.669455	0.999969	1.00723	0.999983	1.41701	0.999777
C06G4.6	0.999096	0.999951	0.665819	0.999969	1.27016	0.999983	1.9237	0.999777
C06H2.2	0.911811	0.999951	0.99419	0.999969	0.923204	0.999983	0.855002	0.999777
C06H5.6	1.45636	0.999951	0.976974	0.999969	0.696437	0.999983	1.03515	0.999777
C07A12.2	0.803281	0.999951	1.70577	0.999969	0.929011	0.999983	0.439469	0.999777
C07A12.7	1.27723	0.999951	1.04269	0.999969	0.764305	0.999983	0.942011	0.999777
C07A4.2	0.855074	0.999951	0.460019	0.999969	0.965296	0.999983	1.79873	0.999777
C07A4.3	0.639842	0.999951	0.465852	0.999969	1.268	0.999983	1.59011	0.999777
C07A9.12	0.857918	0.999951	1.31591	0.999969	0.880752	0.999983	0.587492	0.999777
C07A9.9	0.897052	0.999951	1.04519	0.999969	1.41441	0.999983	1.2159	0.999777
C07B5.4	1.17222	0.999951	1.07247	0.999969	0.864412	0.999983	0.961134	0.999777
C07D10.1	1.60897	0.999951	1.30949	0.999969	0.767366	0.999983	0.936104	0.999777
C07D10.5	1.56992	0.999951	3.09269	0.111492	1.41816	0.999983	0.716721	0.999777
C07D8.6	1.30021	0.999951	0.784486	0.999969	0.993735	0.999983	1.65379	0.999777
C07E3.10	1.20338	0.999951	0.775025	0.999969	1.06171	0.999983	1.66794	0.999777
C07E3.3	0.963496	0.999951	1.7178	0.999969	0.678898	0.999983	0.382526	0.999777
C07E3.9	0.929887	0.999951	1.97603	0.999969	1.15305	0.999983	0.545289	0.999777
C07G1.6	0.957845	0.999951	0.929546	0.999969	1.05854	0.999983	1.07423	0.999777
C07H4.1	0.644893	0.999951	1.05825	0.999969	1.56057	0.999983	0.95954	0.999777
C07H6.2	0.851913	0.999951	1.03986	0.999969	1.1188	0.999983	0.920546	0.999777
C07H6.4	1.02243	0.999951	1.16355	0.999969	0.975028	0.999983	0.859547	0.999777
C08B11.9	1.10205	0.999951	0.904346	0.999969	0.896377	0.999983	1.0955	0.999777
C08B6.10	1.08467	0.999951	1.23452	0.999969	1.04484	0.999983	0.945794	0.999777
C08B6.11	0.768144	0.999951	1.24129	0.999969	1.18446	0.999983	0.736326	0.999777
C08B6.3	0.807253	0.999951	0.593099	0.999969	1.02504	0.999983	1.40066	0.999777
C08B6.4	1.47992	0.999951	0.633133	0.999969	0.661212	0.999983	1.56095	0.999777
C08B6.8	0.754916	0.999951	0.855216	0.999969	1.17539	0.999983	1.04186	0.999777
C08E3.1	1.99395	0.999951	5.69112	0.239842	0.983905	0.999983	0.350866	0.999777
C08E3.13	1.45117	0.999951	4.48038	0.479018	1.27985	0.999983	0.423395	0.999777
C08E8.10	1.06204	0.999951	0.63639	0.999969	0.734651	0.999983	1.23204	0.999777
C08E8.4	1.15124	0.999951	6.32666	0.0135538	0.899445	0.999983	0.164542	0.0151389
C08F11.1	0.948767	0.999951	1.2108	0.999969	1.024	0.999983	0.805272	0.999777
C08F11.10	0.861246	0.999951	0.715247	0.999969	1.00213	0.999983	1.19157	0.999777
C08F11.13	1.09469	0.999951	1.20651	0.999969	1.06432	0.999983	0.972237	0.999777
C08F8.2	1.10433	0.999951	1.23623	0.999969	1.20072	0.999983	1.08161	0.999777
C08F8.3	0.911259	0.999951	1.77531	0.999969	1.31081	0.999983	0.673022	0.999777
C08F8.6	0.42517	0.999951	0.897138	0.999969	2.31521	0.999983	1.09308	0.999777
C08F8.9	0.954517	0.999951	0.796495	0.999969	1.09924	0.999983	1.32433	0.999777
C08G5.7	0.868045	0.999951	1.92939	0.999969	1.10593	0.999983	0.507397	0.999777
C08G9.1	1.20622	0.999951	1.10908	0.999969	0.727747	0.999983	0.795901	0.999777
C08H9.15	1.13303	0.999951	2.06555	0.999969	1.21832	0.999983	0.673811	0.999777
C08H9.16	0.9552	0.999951	1.28305	0.999969	1.11114	0.999983	0.836347	0.999777
C09B7.2	1.19249	0.999951	1.04624	0.999969	0.926219	0.999983	1.06068	0.999777
C09B8.3	1.51983	0.999951	0.482425	0.999969	0.591862	0.999983	1.85996	0.999777
C09B8.4	1.24633	0.999951	1.97856	0.999969	0.910989	0.999983	0.581911	0.999777
C09B9.2	0.996175	0.999951	0.999051	0.999969	1.26728	0.999983	1.23903	0.999777
C09B9.4	0.759917	0.999951	0.735307	0.999969	1.20495	0.999983	1.22685	0.999777
C09B9.85	0.730371	0.999951	0.603096	0.999969	1.16417	0.999983	1.41931	0.999777
C09D4.1	0.323821	0.929322	0.456213	0.999969	0.99348	0.999983	0.705036	0.999777
C09D4.2	0.95561	0.999951	1.72264	0.999969	1.14571	0.999983	0.641022	0.999777
C09D4.3	1.0383	0.999951	0.792832	0.999969	1.07182	0.999983	1.40344	0.999777
C09D4.4	1.073	0.999951	1.20346	0.999969	1.15851	0.999983	1.03549	0.999777
C09D4.9	1.52936	0.999951	0.761301	0.999969	0.667132	0.999983	1.32777	0.999777
C09E7.4	0.891639	0.999951	1.03293	0.999969	1.05237	0.999983	0.908591	0.999777
C09E7.7	0.885974	0.999951	1.22018	0.999969	1.24947	0.999983	0.911123	0.999777
C09E7.8	0.962463	0.999951	1.33524	0.999969	1.15763	0.999983	0.839503	0.999777
C09E8.1	1.27815	0.999951	1.18643	0.999969	0.828252	0.999983	0.897797	0.999777
C09E9.1	0.849127	0.999951	1.0833	0.999969	1.15844	0.999983	0.911657	0.999777
C09F12.2	0.668227	0.999951	0.838079	0.999969	0.902472	0.999983	0.767498	0.999777
C09F5.1	0.781612	0.999951	1.11779	0.999969	0.956368	0.999983	0.677298	0.999777
C09F9.1	1.16108	0.999951	0.503254	0.999969	0.759677	0.999983	1.71177	0.999777
C09F9.2	1.21633	0.999951	0.772916	0.999969	0.668921	0.999983	1.06435	0.999777
C09G1.5	1.18524	0.999951	1.19685	0.999969	0.698936	0.999983	0.697299	0.999777
C09G4.4	0.998466	0.999951	0.921377	0.999969	1.32514	0.999983	1.44077	0.999777
C09G9.1	0.933439	0.999951	1.11998	0.999969	1.15218	0.999983	0.962763	0.999777
C09G9.5	0.990354	0.999951	1.12958	0.999969	0.598613	0.999983	0.529955	0.999777
C09H10.5	0.956556	0.999951	1.47209	0.999969	1.25149	0.999983	0.814536	0.999777
C09H10.9	0.411268	0.999951	0.584567	0.999969	1.42448	0.999983	1.00323	0.999777
C09H5.7	0.645303	0.999951	0.765832	0.999969	1.72782	0.999983	1.46642	0.999777
C10A4.9	0.875429	0.999951	0.622702	0.999969	1.18038	0.999983	1.67047	0.999777
C10B5.1	0.656615	0.999951	0.839619	0.999969	1.3867	0.999983	1.08918	0.999777
C10B5.3	1.10427	0.999951	1.15023	0.999969	1.13185	0.999983	1.08205	0.999777
C10C5.3	0.972245	0.999951	2.07299	0.999969	1.48987	0.999983	0.713101	0.999777
C10C5.4	1.50484	0.999951	1.83935	0.999969	1.79512	0.999983	1.46531	0.999777
C10C5.5	4.40465	0.999951	2.97034	0.999969	0.731791	0.999983	1.12391	0.999777
C10C5.7	1.03647	0.999951	1.01949	0.999969	0.677582	0.999983	0.698751	0.999777
C10C6.7	0.992414	0.999951	0.660029	0.999969	0.823921	0.999983	1.24224	0.999777
C10G11.1	0.901261	0.999951	0.676009	0.999969	1.33592	0.999983	1.76785	0.999777
C10G11.6	1.88484	0.999951	1.90923	0.999969	1.02251	0.999983	1.00469	0.999777
C10G11.8	0.770676	0.999951	1.03152	0.999969	1.33705	0.999983	0.987594	0.999777
C10G8.4	8.73408	0.76162	97.5888	0.00141823	0.653974	0.999983	0.059314	0.999777
C10G8.8	1.10653	0.999951	1.22081	0.999969	1.00019	0.999983	0.909765	0.999777
C11D2.4	0.825899	0.999951	1.08627	0.999969	1.33732	0.999983	1.01905	0.999777
C11D2.7	1.03607	0.999951	0.918967	0.999969	0.905658	0.999983	1.02718	0.999777
C11E4.6	1.00161	0.999951	1.01841	0.999969	0.992536	0.999983	0.98677	0.999777
C11G10.1	0.915384	0.999951	1.39449	0.999969	1.09813	0.999983	0.720589	0.999777
C11H1.2	1.21402	0.999951	0.956474	0.999969	0.963509	0.999983	1.23815	0.999777
C11H1.3	0.945514	0.999951	0.734644	0.999969	0.824815	0.999983	1.06829	0.999777
C11H1.5	1.18235	0.999951	0.70463	0.999969	0.522223	0.999983	0.886515	0.999777
C11H1.7	1.13623	0.999951	0.910777	0.999969	0.762388	0.999983	0.964925	0.999777
C11H1.9	0.982723	0.999951	0.758276	0.999969	0.923589	0.999983	1.20857	0.999777
C12D12.1	1.11384	0.999951	0.953579	0.999969	0.918822	0.999983	1.07841	0.999777
C12D5.3	0.910347	0.999951	1.71789	0.999969	2.00228	0.999983	1.10079	0.999777
C12D8.9	0.866079	0.999951	0.651034	0.999969	1.01788	0.999983	1.33694	0.999777
C13A10.2	1.01146	0.999951	1.53464	0.999969	0.839449	0.999983	0.555567	0.999777
C13B4.1	0.936472	0.999951	1.25576	0.999969	1.20818	0.999983	0.902099	0.999777
C13B7.6	0.784554	0.999951	0.939609	0.999969	1.54166	0.999983	1.29097	0.999777
C13C12.2	0.969874	0.999951	0.726924	0.999969	0.889501	0.999983	1.20315	0.999777
C13C4.4	0.773961	0.999951	0.699412	0.999969	1.0182	0.999983	1.13495	0.999777
C13F10.1	0.977369	0.999951	0.90814	0.999969	1.03023	0.999983	1.11889	0.999777
C13F10.5	0.904697	0.999951	1.09745	0.999969	0.988144	0.999983	0.816768	0.999777
C13F10.6	0.731472	0.999951	1.06573	0.999969	1.29243	0.999983	0.886515	0.999777
C13F10.7	0.779874	0.999951	0.806214	0.999969	1.17142	0.999983	1.13515	0.999777
C13G3.1	0.734906	0.999951	1.97288	0.999969	1.36215	0.999983	0.513301	0.999777
C13G5.2	0.94429	0.999951	1.27927	0.999969	1.1464	0.999983	0.843028	0.999777
C14A11.9	0.879353	0.999951	0.902979	0.999969	1.08383	0.999983	1.05941	0.999777
C14A4.12	1.52809	0.999951	1.30017	0.999969	0.624904	0.999983	0.737656	0.999777
C14A4.6	1.02221	0.999951	0.87379	0.999969	1.07674	0.999983	1.26761	0.999777
C14A4.7	0.935454	0.999951	0.73756	0.999969	1.05613	0.999983	1.3531	0.999777
C14A4.9	2.16023	0.999951	1.01015	0.999969	0.658841	0.999983	1.41949	0.999777
C14A6.13	1.45171	0.999951	0.842342	0.999969	0.830393	0.999983	1.41306	0.999777
C14A6.6	0.683839	0.999951	0.718487	0.999969	1.36242	0.999983	1.28639	0.999777
C14A6.8	0.743596	0.999951	0.821242	0.999969	1.34944	0.999983	1.22484	0.999777
C14B1.12	0.627411	0.999951	1.40178	0.999969	2.05808	0.999983	0.94912	0.999777
C14B1.2	0.607636	0.999951	1.33424	0.999969	1.81316	0.999983	0.822266	0.999777
C14B1.3	1.05683	0.999951	1.19127	0.999969	0.476195	0.999983	0.423695	0.999777
C14B1.8	0.87858	0.999951	0.959683	0.999969	1.05572	0.999983	0.968296	0.999777
C14B1.9	0.735187	0.999951	1.27044	0.999969	1.48322	0.999983	0.847938	0.999777
C14B4.2	0.75275	0.999951	0.930542	0.999969	0.974073	0.999983	0.792264	0.999777
C14B9.10	1.09681	0.999951	0.739017	0.999969	0.921764	0.999983	1.37463	0.999777
C14B9.2	1.00248	0.999951	0.926219	0.999969	0.943221	0.999983	1.03194	0.999777
C14B9.3	0.989458	0.999951	1.03301	0.999969	0.869149	0.999983	0.83736	0.999777
C14B9.8	1.12778	0.999951	0.881439	0.999969	0.895044	0.999983	1.15162	0.999777
C14C10.1	0.801816	0.999951	0.990579	0.999969	1.27392	0.999983	1.01024	0.999777
C14C10.5	0.98253	0.999951	0.893151	0.999969	1.05128	0.999983	1.16466	0.999777
C14C11.1	0.866898	0.999951	0.871227	0.999969	1.12221	0.999983	1.09995	0.999777
C14C11.4	0.937801	0.999951	1.56017	0.999969	1.33287	0.999983	0.817316	0.999777
C14C11.7	1.14966	0.999951	1.12294	0.999969	0.85201	0.999983	0.875693	0.999777
C14C6.2	1.13974	0.999951	1.98541	0.999969	1.02571	0.999983	0.593195	0.999777
C14C6.5	1.4986	0.999951	1.32832	0.999969	1.61614	0.999983	1.8331	0.999777
C14F11.4	0.922915	0.999951	1.34559	0.999969	1.50436	0.999983	1.01525	0.999777
C14F11.6	1.64642	0.999951	1.10376	0.999969	0.685484	0.999983	1.02961	0.999777
C14H10.2	0.742556	0.999951	0.70135	0.999969	1.09577	0.999983	1.16174	0.999777
C14H10.3	1.25821	0.999951	0.839587	0.999969	0.785505	0.999983	1.18516	0.999777
C15A11.2	0.944896	0.999951	0.623281	0.999969	0.966502	0.999983	1.43417	0.999777
C15A11.7	1.32739	0.999951	4.43563	0.705692	0.881272	0.999983	0.273589	0.032092
C15B12.1	0.766098	0.999951	0.824517	0.999969	1.45882	0.999983	1.39559	0.999777
C15C6.1	1.10402	0.999951	0.676938	0.999969	0.757194	0.999983	1.2356	0.999777
C15C6.2	0.875589	0.999951	1.07865	0.999969	1.36951	0.999983	1.09631	0.999777
C15C6.3	0.999825	0.999951	1.09984	0.999969	1.14193	0.999983	1.04225	0.999777
C15C7.4	0.860478	0.999951	0.953048	0.999969	0.750425	0.999983	0.682278	0.999777
C15C7.5	0.87847	0.999951	0.71368	0.999969	1.05179	0.999983	1.29945	0.999777
C15C7.7	0.903494	0.999951	0.772161	0.999969	0.974342	0.999983	1.1484	0.999777
C15C8.4	1.18782	0.999951	1.18968	0.999969	0.924986	0.999983	0.925903	0.999777
C15C8.7	0.904116	0.999951	1.13173	0.999969	1.05786	0.999983	0.847545	0.999777
C15F1.1	0.988508	0.999951	1.16584	0.999969	1.41777	0.999983	1.19865	0.999777
C15F1.2	1.2452	0.999951	0.770631	0.999969	0.518024	0.999983	0.853275	0.999777
C15F1.5	0.706217	0.999951	0.941565	0.999969	1.25653	0.999983	0.952627	0.999777
C15H11.1	0.846819	0.999951	0.893507	0.999969	1.22393	0.999983	1.12775	0.999777
C15H11.11	1.15238	0.999951	0.749738	0.999969	0.888099	0.999983	1.36644	0.999777
C15H7.3	0.680764	0.999951	0.631088	0.999969	1.22413	0.999983	1.31695	0.999777
C15H9.11	0.605149	0.999951	1.37014	0.999969	1.34748	0.999983	0.626478	0.999777
C15H9.4	1.2171	0.999951	1.03104	0.999969	0.817231	0.999983	0.967194	0.999777
C15H9.5	1.11749	0.999951	1.46168	0.999969	1.11362	0.999983	0.864853	0.999777
C15H9.9	0.941196	0.999951	0.74308	0.999969	0.946149	0.999983	1.20514	0.999777
C16A11.10	0.897971	0.999951	0.706001	0.999969	1.05715	0.999983	1.34415	0.999777
C16A11.2	0.871679	0.999951	0.911151	0.999969	1.24287	0.999983	1.19474	0.999777
C16A11.3	0.980218	0.999951	0.963857	0.999969	0.948768	0.999983	0.96286	0.999777
C16A11.4	1.0309	0.999951	0.793867	0.999969	1.02701	0.999983	1.33747	0.999777
C16A11.7	0.765893	0.999951	0.828793	0.999969	1.60402	0.999983	1.42018	0.999777
C16A3.2	0.793743	0.999951	1.06087	0.999969	1.33787	0.999983	1.00027	0.999792
C16A3.4	0.90254	0.999951	0.964197	0.999969	1.12773	0.999983	1.05865	0.999777
C16A3.5	0.973989	0.999951	0.798956	0.999969	1.06938	0.999983	1.31172	0.999777
C16A3.6	0.973399	0.999951	1.01686	0.999969	1.03803	0.999983	0.998129	0.999777
C16B8.3	0.952865	0.999951	1.17472	0.999969	1.02167	0.999983	0.834593	0.999777
C16B8.4	0.991864	0.999951	0.590717	0.999969	0.675764	0.999983	1.15102	0.999777
C16C10.1	0.815314	0.999951	1.30678	0.999969	1.29725	0.999983	0.811247	0.999777
C16C10.13	1.02648	0.999951	1.17688	0.999969	1.02153	0.999983	0.867641	0.999777
C16C10.2	1.01768	0.999951	0.899928	0.999969	1.08701	0.999983	1.22285	0.999777
C16C10.4	1.17776	0.999951	1.23723	0.999969	1.12082	0.999983	1.07212	0.999777
C16C10.8	1.00014	0.999951	0.783374	0.999969	1.17332	0.999983	1.5023	0.999777
C16C2.4	1.16967	0.999951	1.4064	0.999969	1.13105	0.999983	0.942181	0.999777
C16C8.11	0.896689	0.999951	0.911147	0.999969	1.18898	0.999983	1.17049	0.999777
C16C8.12	0.747407	0.999951	1.28542	0.999969	1.14781	0.999983	0.660365	0.999777
C16C8.13	0.566766	0.999951	0.822481	0.999969	1.65188	0.999983	1.14297	0.999777
C16C8.14	1.23301	0.999951	1.58243	0.999969	1.06078	0.999983	0.812224	0.999777
C16C8.16	0.808809	0.999951	0.97807	0.999969	1.44623	0.999983	1.19943	0.999777
C16C8.18	0.914652	0.999951	0.691767	0.999969	1.08105	0.999983	1.43002	0.999777
C16C8.20	0.613792	0.999951	1.15818	0.999969	1.68519	0.999983	0.893746	0.999777
C16C8.22	1.7034	0.999951	1.21682	0.999969	0.929354	0.999983	1.26851	0.999777
C16C8.4	0.583665	0.999951	1.01745	0.999969	1.51835	0.999983	0.869654	0.999777
C16C8.5	0.769529	0.999951	0.662507	0.999969	1.11516	0.999983	1.29361	0.999777
C16D2.1	0.781612	0.999951	1.16882	0.999969	1.04785	0.999983	0.704593	0.999777
C16D9.1	0.658344	0.999951	0.802392	0.999969	0.982488	0.999983	0.839009	0.999777
C16D9.4	0.949319	0.999951	1.26266	0.999969	0.995585	0.999983	0.753074	0.999777
C16D9.6	0.686254	0.999951	1.21424	0.999969	1.14131	0.999983	0.660559	0.999777
C16D9.9	0.693421	0.999951	0.892511	0.999969	0.636718	0.999983	0.497876	0.999777
C16E9.1	1.24597	0.999951	1.10253	0.999969	0.862262	0.999983	0.998518	0.999777
C16E9.2	0.731661	0.999951	0.961016	0.999969	1.13735	0.999983	0.878302	0.999777
C16H3.3	1.13743	0.999951	1.01673	0.999969	0.700926	0.999983	0.789169	0.999777
C17B7.12	1.42394	0.999951	0.684507	0.999969	1.46136	0.999983	3.10501	0.426008
C17C3.1	1.14321	0.999951	1.46659	0.999969	0.746453	0.999983	0.58355	0.999777
C17D12.5	0.932081	0.999951	0.644845	0.999969	0.985005	0.999983	1.39926	0.999777
C17E4.10	0.848288	0.999951	1.2617	0.999969	0.993661	0.999983	0.670034	0.999777
C17E4.11	0.954723	0.999951	0.975748	0.999969	1.22338	0.999983	1.20439	0.999777
C17E4.20	1.21962	0.999951	2.31283	0.999969	0.921197	0.999983	0.489632	0.999777
C17E4.4	0.698932	0.999951	1.01554	0.999969	1.40758	0.999983	0.977367	0.999777
C17E4.6	0.878126	0.999951	1.04565	0.999969	1.28214	0.999983	1.08084	0.999777
C17F3.1	1.14649	0.999951	0.747205	0.999969	1.00925	0.999983	1.53097	0.999777
C17F3.3	0.732761	0.999951	0.718289	0.999969	1.0342	0.999983	1.03303	0.999777
C17F4.2	1.96005	0.999951	1.22971	0.999969	0.725758	0.999983	1.16454	0.999777
C17F4.7	0.946647	0.999951	0.927671	0.999969	0.811918	0.999983	0.833114	0.999777
C17G1.5	0.901321	0.999951	0.846263	0.999969	1.01885	0.999983	1.09968	0.999777
C17G10.1	0.982104	0.999951	0.907714	0.999969	1.1547	0.999983	1.25257	0.999777
C17G10.13	0.814939	0.999951	1.02936	0.999969	1.17281	0.999983	0.92415	0.999777
C17G10.3	1.04972	0.999951	0.647829	0.999969	0.898633	0.999983	1.44602	0.999777
C17G10.7	0.735969	0.999951	0.972334	0.999969	1.19901	0.999983	0.911431	0.999777
C17H11.2	1.01702	0.999951	0.772315	0.999969	0.749444	0.999983	1.0027	0.999777
C17H11.6	0.89321	0.999951	1.17888	0.999969	1.05557	0.999983	0.811449	0.999777
C17H12.11	1.00148	0.999951	2.30468	0.999969	1.42014	0.999983	0.616547	0.999777
C17H12.12	0.590624	0.999951	1.15366	0.999969	1.92031	0.999983	0.968892	0.999777
C17H12.2	1.00538	0.999951	1.20467	0.999969	1.09137	0.999983	0.913857	0.999777
C17H12.3	0.924992	0.999951	0.822751	0.999969	1.15221	0.999983	1.28422	0.999777
C17H12.37	0.999433	0.999951	2.29498	0.999969	1.43462	0.999983	0.62395	0.999777
C17H12.5	0.912717	0.999951	0.812537	0.999969	1.13924	0.999983	1.27016	0.999777
C17H12.6	0.963926	0.999951	1.34809	0.999969	1.5514	0.999983	1.14248	0.999777
C17H12.8	0.867195	0.999951	0.144132	0.0135226	0.352519	0.999983	2.13464	0.653702
C18A11.1	1.11544	0.999951	2.17567	0.999969	1.01499	0.999983	0.524253	0.999777
C18A11.2	0.846019	0.999951	1.01469	0.999969	0.810971	0.999983	0.681715	0.999777
C18A11.3	0.945838	0.999951	0.495224	0.999969	0.602919	0.999983	1.1612	0.999777
C18A3.10	0.956454	0.999951	1.12228	0.999969	1.13243	0.999983	0.974944	0.999777
C18A3.3	1.12043	0.999951	0.842692	0.999969	1.04625	0.999983	1.39442	0.999777
C18A3.7	0.958192	0.999951	0.672019	0.999969	1.18949	0.999983	1.69302	0.999777
C18A3.9	0.753364	0.999951	0.712962	0.999969	1.35153	0.999983	1.43987	0.999777
C18B12.4	0.800227	0.999951	1.09224	0.999969	1.05308	0.999983	0.776973	0.999777
C18B12.6	1.16087	0.999951	0.954792	0.999969	0.94428	0.999983	1.15582	0.999777
C18B2.3	1.01471	0.999951	0.578551	0.999969	0.74179	0.999983	1.30877	0.999777
C18B2.4	1.02236	0.999951	2.49702	0.44239	0.868966	0.999983	0.357911	0.0889163
C18B2.5	1.04168	0.999951	0.726501	0.999969	0.881524	0.999983	1.27165	0.999777
C18C4.7	1.20452	0.999951	0.879067	0.999969	0.703214	0.999983	0.964678	0.999777
C18D11.1	0.79819	0.999951	0.755047	0.999969	0.962107	0.999983	1.02282	0.999777
C18D11.3	1.13999	0.999951	0.796784	0.999969	1.00441	0.999983	1.43849	0.999777
C18D4.6	0.988677	0.999951	1.34385	0.999969	1.18427	0.999983	0.885887	0.999777
C18E3.1	0.957081	0.999951	0.706705	0.999969	1.02318	0.999983	1.39572	0.999777
C18E3.3	0.705044	0.999951	1.19249	0.999969	1.11427	0.999983	0.669355	0.999777
C18E3.9	1.16152	0.999951	1.15209	0.999969	0.953278	0.999983	0.961085	0.999777
C18E9.2	1.06296	0.999951	1.0727	0.999969	0.975148	0.999983	0.97148	0.999777
C18E9.4	1.03069	0.999951	0.726304	0.999969	1.01868	0.999983	1.45157	0.999777
C18E9.5	1.35398	0.999951	0.946623	0.999969	0.855758	0.999983	1.23488	0.999777
C18E9.7	0.588813	0.999951	0.508417	0.999969	1.65392	0.999983	1.90991	0.999777
C18E9.8	0.997344	0.999951	0.62284	0.999969	0.890189	0.999983	1.42188	0.999777
C18E9.9	0.951425	0.999951	1.2631	0.999969	0.834027	0.999983	0.630101	0.999777
C18F10.7	0.94337	0.999951	1.18261	0.999969	1.01542	0.999983	0.81247	0.999777
C18G1.1	0.627426	0.999951	0.841981	0.999969	0.920917	0.999983	0.709695	0.999777
C18G1.9	1.10521	0.999951	0.804627	0.999969	1.06367	0.999983	1.39992	0.999777
C18H7.11	1.18265	0.999951	1.97294	0.999969	1.12286	0.999983	0.673862	0.999777
C18H7.4	1.15763	0.999951	0.694035	0.999969	0.772057	0.999983	1.26335	0.999777
C18H7.7	1.00931	0.999951	0.736623	0.999969	1.09267	0.999983	1.496	0.999777
C18H9.6	1.40826	0.999951	1.68876	0.999969	1.10362	0.999983	0.923257	0.999777
C23F12.4	0.940079	0.999951	0.996617	0.999969	0.945669	0.999983	0.901781	0.999777
C23G10.1	0.448323	0.999951	0.607424	0.999969	1.92767	0.999983	1.43673	0.999777
C23G10.2	1.09462	0.999951	0.615389	0.999969	0.907416	0.999983	1.62565	0.999777
C23G10.7	0.899723	0.999951	1.03386	0.999969	1.33442	0.999983	1.16585	0.999777
C23G10.8	1.1088	0.999951	0.97888	0.999969	0.903904	0.999983	1.02884	0.999777
C23H3.2	2.06002	0.999951	1.28558	0.999969	0.763406	0.999983	1.23497	0.999777
C23H3.5	0.775824	0.999951	0.937384	0.999969	1.26392	0.999983	1.05131	0.999777
C23H3.9	1.69714	0.999951	0.912274	0.999969	0.759004	0.999983	1.42262	0.999777
C23H4.8	0.8682	0.999951	2.72466	0.999969	1.0418	0.999983	0.334722	0.999777
C23H5.15	1.83024	0.999951	2.56336	0.999969	0.469539	0.999983	0.351621	0.607422
C23H5.8	1.14085	0.999951	1.32499	0.999969	1.04224	0.999983	0.902648	0.999777
C24A11.1	0.699592	0.999951	0.701723	0.999969	1.27027	0.999983	1.25198	0.999777
C24A3.2	0.805627	0.999951	0.842722	0.999969	1.1247	0.999983	1.08248	0.999777
C24A3.4	1.09013	0.999951	1.22239	0.999969	1.10672	0.999983	1.00701	0.999777
C24B5.1	1.22184	0.999951	1.01018	0.999969	0.355196	0.999983	0.431097	0.999777
C24B5.4	1.30118	0.999951	1.03693	0.999969	0.853559	0.999983	1.08326	0.999777
C24B9.3	1.52152	0.999951	1.39343	0.999969	1.25167	0.999983	1.37236	0.999777
C24D10.2	1.01017	0.999951	0.764557	0.999969	1.00413	0.999983	1.32144	0.999777
C24D10.4	1.04541	0.999951	1.23562	0.999969	1.10041	0.999983	0.933633	0.999777
C24D10.6	0.898103	0.999951	0.883544	0.999969	1.00474	0.999983	1.02494	0.999777
C24F3.2	0.861355	0.999951	1.33835	0.999969	0.898016	0.999983	0.576786	0.999777
C24G6.8	0.877638	0.999951	0.918436	0.999969	1.06689	0.999983	1.02331	0.999777
C24H10.1	0.796441	0.999951	0.851783	0.999969	1.13879	0.999983	1.09802	0.999777
C24H10.2	0.927441	0.999951	0.715637	0.999969	0.808707	0.999983	1.05737	0.999777
C24H10.3	1.41902	0.999951	0.592725	0.999969	0.695662	0.999983	1.67714	0.999777
C24H11.1	0.783402	0.999951	0.499113	0.999969	1.019	0.999983	1.57837	0.999777
C24H11.2	0.84248	0.999951	0.497446	0.999969	0.956536	0.999983	1.58893	0.999777
C24H12.4	1.24764	0.999951	0.961791	0.999969	0.926426	0.999983	1.2012	0.999777
C25A1.1	0.995864	0.999951	1.33961	0.999969	1.13181	0.999983	0.842265	0.999777
C25A1.16	1.0946	0.999951	0.877576	0.999969	1.15885	0.999983	1.45326	0.999777
C25A11.2	0.941832	0.999951	1.67927	0.999969	1.07093	0.999983	0.60605	0.999777
C25A6.1	0.605958	0.999951	0.728933	0.999969	1.26712	0.999983	1.0618	0.999777
C25A8.5	0.658487	0.999951	0.631578	0.999969	1.22105	0.999983	1.26102	0.999777
C25B8.8	1.36908	0.999951	0.338569	0.999969	0.502547	0.999983	2.01904	0.999777
C25D7.1	0.782292	0.999951	0.73961	0.999969	1.43192	0.999983	1.48989	0.999777
C25D7.10	1.07911	0.999951	1.13673	0.999969	1.0651	0.999983	1.01281	0.999777
C25D7.5	0.77088	0.999951	1.73225	0.999969	1.65737	0.999983	0.746597	0.999777
C25E10.10	1.04343	0.999951	1.4205	0.999969	1.17519	0.999983	0.868921	0.999777
C25E10.12	1.13852	0.999951	1.17514	0.999969	0.829525	0.999983	0.807922	0.999777
C25E10.17	1.10614	0.999951	0.76188	0.999969	1.32182	0.999983	1.87352	0.999777
C25E10.4	0.913519	0.999951	1.23001	0.999969	0.727852	0.999983	0.54571	0.999777
C25E10.5	1.13735	0.999951	1.62386	0.999969	0.83961	0.999983	0.594508	0.999777
C25E10.8	0.980347	0.999951	2.95202	0.999969	1.12808	0.999983	0.389632	0.372917
C25F6.1	1.18249	0.999951	1.07598	0.999969	0.807739	0.999983	0.894851	0.999777
C25F6.6	1.35682	0.999951	0.533847	0.999969	0.754787	0.999983	1.9037	0.999777
C25F6.7	1.38534	0.999951	0.654458	0.999969	0.580659	0.999983	1.23076	0.999777
C25F9.10	0.762009	0.999951	0.986763	0.999969	1.32604	0.999983	1.02328	0.999777
C25F9.11	1.80382	0.999951	7.63804	0.0315292	1.39241	0.999983	0.333884	0.0896346
C25F9.12	1.72356	0.999951	3.22564	0.999969	0.830673	0.999983	0.447469	0.999777
C25F9.14	2.20337	0.999951	3.79496	0.158468	0.895712	0.999983	0.520596	0.999777
C25F9.4	0.735494	0.999951	0.988649	0.999969	0.700675	0.999983	0.524462	0.999777
C25F9.6	0.745563	0.999951	1.26868	0.999969	1.74577	0.999983	1.02898	0.999777
C25F9.9	2.22134	0.999951	0.735688	0.999969	0.622109	0.999983	1.88199	0.999777
C25G4.2	0.985483	0.999951	1.2885	0.999969	0.846749	0.999983	0.650801	0.999777
C25G4.3	0.777506	0.999951	0.908498	0.999969	1.33888	0.999983	1.15029	0.999777
C25G4.8	1.13985	0.999951	0.659237	0.999969	0.601614	0.999983	1.04015	0.999777
C25H3.10	0.507645	0.999951	1.93381	0.999969	0.694991	0.999983	0.18901	0.0451019
C25H3.11	0.979	0.999951	1.15196	0.999969	1.11277	0.999983	0.948782	0.999777
C25H3.14	0.91348	0.999951	1.11303	0.999969	1.23115	0.999983	1.02083	0.999777
C25H3.16	1.05839	0.999951	0.492907	0.999969	0.850098	0.999983	1.819	0.999777
C25H3.17	1.09721	0.999951	0.772616	0.999969	0.994233	0.999983	1.41958	0.999777
C25H3.3	0.716024	0.999951	0.96927	0.999969	1.33251	0.999983	0.988475	0.999777
C25H3.7	0.851461	0.999951	0.986245	0.999969	1.11032	0.999983	0.96477	0.999777
C25H3.9	1.07604	0.999951	0.716915	0.999969	0.925994	0.999983	1.39673	0.999777
C26B2.2	1.04249	0.999951	0.68885	0.999969	0.894959	0.999983	1.3292	0.999777
C26B2.7	1.11473	0.999951	0.920251	0.999969	0.957163	0.999983	1.16301	0.999777
C26B9.1	1.00913	0.999951	1.34313	0.999969	0.954435	0.999983	0.729731	0.999777
C26B9.3	1.1376	0.999951	0.575808	0.999969	0.767735	0.999983	1.5231	0.999777
C26B9.5	0.89748	0.999951	0.727465	0.999969	0.909802	0.999983	1.13108	0.999777
C26B9.7	2.28867	0.999951	1.60857	0.999969	0.85458	0.999983	1.22203	0.999777
C26C6.9	0.922242	0.999951	0.917705	0.999969	1.14076	0.999983	1.15229	0.999777
C26D10.6	0.880713	0.999951	1.0674	0.999969	1.17302	0.999983	0.976423	0.999777
C26E6.12	1.05875	0.999951	1.29606	0.999969	1.43514	0.999983	1.17971	0.999777
C26F1.1	0.725726	0.999951	0.664474	0.999969	1.63542	0.999983	1.77811	0.999777
C26F1.14	0.933261	0.999951	0.8885	0.999969	1.10703	0.999983	1.17118	0.999777
C26F1.3	0.95224	0.999951	0.919867	0.999969	1.21513	0.999983	1.25741	0.999777
C27A2.12	0.881641	0.999951	0.564898	0.999969	1.08672	0.999983	1.66688	0.999777
C27A7.1	0.888992	0.999951	1.01618	0.999969	0.6969	0.999983	0.617333	0.999777
C27A7.5	0.805139	0.999951	1.17039	0.999969	1.34676	0.999983	0.929844	0.999777
C27A7.6	1.09067	0.999951	1.6859	0.999969	1.19576	0.999983	0.758398	0.999777
C27B7.2	0.803914	0.999951	0.850761	0.999969	1.12581	0.999983	1.06935	0.999777
C27B7.5	0.895691	0.999951	0.952076	0.999969	1.29564	0.999983	1.22186	0.999777
C27B7.6	0.524708	0.999951	0.563597	0.999969	1.8662	0.999983	1.71084	0.999777
C27B7.7	1.47121	0.999951	1.00275	0.999969	0.613217	0.999983	0.891446	0.999777
C27C12.4	1.16622	0.999951	0.935026	0.999969	0.765437	0.999983	0.961556	0.999777
C27C7.1	1.02453	0.999951	1.30721	0.999969	1.3497	0.999983	1.05802	0.999777
C27D6.12	0.841309	0.999951	0.626527	0.999969	0.746984	0.999983	1.01438	0.999777
C27D6.3	0.682619	0.999951	0.730521	0.999969	1.80447	0.999983	1.65392	0.999777
C27D8.1	1.12256	0.999951	0.565917	0.999969	0.79959	0.999983	1.56985	0.999777
C27D8.3	0.742412	0.999951	0.904326	0.999969	1.18434	0.999983	0.992498	0.999777
C27D8.4	1.13103	0.999951	1.01627	0.999969	0.892476	0.999983	0.985753	0.999777
C27D9.1	0.878608	0.999951	1.97848	0.999969	1.51871	0.999983	0.668633	0.999777
C27D9.2	1.16832	0.999951	0.726295	0.999969	3.83892	0.999983	5.79129	0.804191
C27F2.10	0.896778	0.999951	1.10938	0.999969	1.3206	0.999983	1.07611	0.999777
C27F2.4	0.860665	0.999951	0.87931	0.999969	1.30889	0.999983	1.28692	0.999777
C27F2.7	0.914638	0.999951	1.4378	0.999969	1.15209	0.999983	0.73019	0.999777
C27F2.9	0.829212	0.999951	0.977751	0.999969	1.34757	0.999983	1.15359	0.999777
C27H5.2	1.27421	0.999951	0.959455	0.999969	0.634438	0.999983	0.848292	0.999777
C27H5.4	1.17046	0.999951	0.600955	0.999969	0.73001	0.999983	1.42901	0.999777
C27H6.8	1.00243	0.999951	0.868388	0.999969	1.17205	0.999983	1.35894	0.999777
C27H6.9	1.28224	0.999951	1.10468	0.999969	0.774351	0.999983	0.896994	0.999777
C28C12.1	1.04204	0.999951	0.787793	0.999969	1.10886	0.999983	1.45077	0.999777
C28C12.11	0.633267	0.999951	0.813123	0.999969	1.63096	0.999983	1.25607	0.999777
C28C12.12	0.872579	0.999951	1.13427	0.999969	1.34685	0.999983	1.04097	0.999777
C28C12.4	0.695796	0.999951	1.60459	0.999969	1.20769	0.999983	0.535044	0.999777
C28D4.4	1.35751	0.999951	0.618697	0.999969	0.689049	0.999983	1.46322	0.999777
C28D4.5	0.724765	0.999951	0.72311	0.999969	1.29968	0.999983	1.26615	0.999777
C28D4.7	0.845639	0.999951	1.00995	0.999969	1.15176	0.999983	0.931152	0.999777
C28D4.8	0.93525	0.999951	0.662153	0.999969	0.929329	0.999983	1.24634	0.999777
C28G1.6	0.723384	0.999951	1.15203	0.999969	1.46126	0.999983	0.915315	0.999777
C28H8.14	1.17504	0.999951	1.15272	0.999969	0.830592	0.999983	0.850064	0.999777
C28H8.3	1.05215	0.999951	0.991478	0.999969	0.958812	0.999983	1.02301	0.999777
C28H8.5	0.512089	0.999951	0.629059	0.999969	1.45806	0.999983	1.12935	0.999777
C29A12.1	0.56645	0.999951	1.18317	0.999969	1.7191	0.999983	0.825866	0.999777
C29A12.6	1.07119	0.999951	0.834391	0.999969	0.711173	0.999983	0.917065	0.999777
C29E4.11	0.704775	0.999951	0.762533	0.999969	1.16072	0.999983	1.10558	0.999777
C29E4.12	0.867405	0.999951	0.832653	0.999969	1.19164	0.999983	1.25143	0.999777
C29E4.13	1.03494	0.999951	1.09406	0.999969	1.14616	0.999983	1.08623	0.999777
C29E4.15	1.12088	0.999951	0.777789	0.999969	0.624334	0.999983	0.922591	0.999777
C29F3.7	1.25387	0.999951	1.45312	0.999969	1.56738	0.999983	1.358	0.999777
C29F5.1	0.944104	0.999951	0.606764	0.999969	0.894763	0.999983	1.40012	0.999777
C29F5.3	0.681404	0.999951	0.513387	0.999969	1.20156	0.999983	1.58527	0.999777
C29F7.2	0.932282	0.999951	0.843768	0.999969	1.33401	0.999983	1.48131	0.999777
C29F7.3	1.13217	0.999951	1.96707	0.999969	1.18619	0.999983	0.685806	0.999777
C29F7.t3	0.748618	0.999951	1.05432	0.999969	1.77816	0.999983	1.26771	0.999777
C29F9.2	0.983527	0.999951	0.883623	0.999969	1.18793	0.999983	1.31249	0.999777
C29G2.6	0.874864	0.999951	1.23882	0.999969	1.24054	0.999983	0.859845	0.999777
C29H12.2	1.18286	0.999951	0.875242	0.999969	0.999942	0.999983	1.35668	0.999777
C29H12.6	0.856147	0.999951	1.03448	0.999969	0.989776	0.999983	0.825991	0.999777
C30B5.2	0.96297	0.999951	1.02677	0.999969	1.00723	0.999983	0.947802	0.999777
C30B5.6	1.19899	0.999951	0.770224	0.999969	0.946052	0.999983	1.48317	0.999777
C30B5.7	0.895029	0.999951	1.04998	0.999969	0.862832	0.999983	0.741527	0.999777
C30E1.9	2.44477	0.999951	3.09571	0.095295	0.680867	0.999983	0.536846	0.999777
C30F12.2	0.870072	0.999951	1.23161	0.999969	1.19105	0.999983	0.846985	0.999777
C30F12.4	0.790795	0.999951	1.19843	0.999969	1.21031	0.999983	0.792404	0.999777
C30F12.5	0.781031	0.999951	1.06607	0.999969	1.04515	0.999983	0.776587	0.999777
C30F2.3	0.818195	0.999951	0.574253	0.999969	0.786267	0.999983	1.18569	0.999777
C30F2.4	1.11795	0.999951	0.805569	0.999969	0.555395	0.999983	0.772258	0.999777
C30F8.3	0.796451	0.999951	0.561133	0.999969	0.957505	0.999983	1.32672	0.999777
C30G12.1	2.10892	0.999951	0.554689	0.999969	0.559651	0.999983	2.06743	0.999777
C30G12.10	0.338633	0.999951	0.444349	0.999969	0.961273	0.999983	0.741577	0.999777
C30G12.4	1.86713	0.999951	0.993082	0.999969	0.849779	0.999983	1.60828	0.999777
C30G12.6	0.87848	0.999951	0.99311	0.999969	1.08992	0.999983	0.970013	0.999777
C30G4.4	1.15022	0.999951	1.39398	0.999969	0.853534	0.999983	0.708081	0.999777
C30G7.2	0.930844	0.999951	0.88346	0.999969	0.923848	0.999983	0.979875	0.999777
C30G7.3	0.958043	0.999951	0.794437	0.999969	1.00218	0.999983	1.17145	0.999777
C30H6.5	0.808792	0.999951	0.526381	0.999969	1.15959	0.999983	1.74918	0.999777
C30H6.8	1.15205	0.999951	1.09186	0.999969	0.931521	0.999983	0.982773	0.999777
C30H6.9	0.904968	0.999951	0.849822	0.999969	1.02857	0.999983	1.10064	0.999777
C31B8.7	0.706053	0.999951	1.08594	0.999969	1.42688	0.999983	0.944235	0.999777
C31C9.2	1.09937	0.999951	0.546421	0.999969	0.616665	0.999983	1.24724	0.999777
C31C9.7	1.22349	0.999951	1.53952	0.999969	1.73564	0.999983	1.38504	0.999777
C31E10.5	1.22626	0.999951	1.58902	0.999969	0.925971	0.999983	0.73363	0.999777
C31E10.6	1.14017	0.999951	1.25785	0.999969	1.14704	0.999983	1.04767	0.999777
C31H1.1	0.446684	0.999951	0.545136	0.999969	1.37148	0.999983	1.12962	0.999777
C31H1.2	0.777596	0.999951	0.756293	0.999969	1.27092	0.999983	1.31575	0.999777
C31H1.5	0.720663	0.999951	0.742559	0.999969	1.38307	0.999983	1.31771	0.999777
C31H1.8	0.861549	0.999951	1.33856	0.999969	1.28706	0.999983	0.828242	0.999777
C31H5.4	1.15622	0.999951	1.60398	0.999969	1.07832	0.999983	0.78064	0.999777
C31H5.5	0.661859	0.999951	0.893173	0.999969	1.35716	0.999983	1.01392	0.999777
C31H5.6	1.45568	0.999951	0.796173	0.999969	0.901913	0.999983	1.65409	0.999777
C32D5.10	0.742905	0.999951	1.00394	0.999969	1.33125	0.999983	0.990175	0.999777
C32D5.11	1.01917	0.999951	1.05478	0.999969	1.08211	0.999983	1.04698	0.999777
C32D5.12	1.24286	0.999951	0.946796	0.999969	0.686772	0.999983	0.906481	0.999777
C32D5.6	1.11486	0.999951	1.49106	0.999969	1.11921	0.999983	0.845237	0.999777
C32D5.7	0.796059	0.999951	0.913973	0.999969	0.681788	0.999983	0.604766	0.999777
C32D5.8	1.05057	0.999951	0.969396	0.999969	0.902834	0.999983	0.983727	0.999777
C32E12.1	1.11212	0.999951	0.727584	0.999969	0.919688	0.999983	1.36492	0.999777
C32E12.4	0.863352	0.999951	0.819776	0.999969	0.758961	0.999983	0.805455	0.999777
C32E8.4	0.689295	0.999951	0.788303	0.999969	1.43813	0.999983	1.24637	0.999777
C32E8.5	0.70024	0.999951	0.990299	0.999969	1.56917	0.999983	1.11614	0.999777
C32E8.9	1.16112	0.999951	0.888984	0.999969	0.828067	0.999983	1.09227	0.999777
C32F10.4	0.916868	0.999951	2.16514	0.999969	1.12558	0.999983	0.478075	0.999777
C32F10.8	1.29293	0.999951	1.01356	0.999969	0.939293	0.999983	1.20438	0.999777
C32H11.11	1.53679	0.999951	0.583538	0.999969	0.656562	0.999983	1.69325	0.999777
C32H11.4	2.10134	0.999951	3.07797	0.848712	2.5182	0.999983	1.70471	0.999777
C32H11.5	1.15674	0.999951	0.482281	0.999969	0.791772	0.999983	1.86634	0.999777
C32H11.8	1.53679	0.999951	0.583538	0.999969	0.656562	0.999983	1.69325	0.999777
C32H11.9	12.6669	0.0011529	28.3564	7.94244e-09	3.16915	0.626679	1.41376	0.999777
C33A11.2	1.26948	0.999951	1.59693	0.999969	0.58243	0.999983	0.464843	0.891026
C33A12.1	0.85234	0.999951	0.664302	0.999969	0.97021	0.999983	1.25251	0.999777
C33A12.19	0.938307	0.999951	1.55142	0.999969	0.755536	0.999983	0.469531	0.999777
C33A12.3	0.782571	0.999951	0.940975	0.999969	1.27277	0.999983	1.06205	0.999777
C33A12.4	1.08377	0.999951	0.862922	0.999969	0.5495	0.999983	0.695485	0.999777
C33B4.2	1.20527	0.999951	0.727454	0.999969	0.809657	0.999983	1.34897	0.999777
C33B4.4	0.801417	0.999951	1.07228	0.999969	1.37141	0.999983	1.02906	0.999777
C33C12.10	1.01143	0.999951	0.84252	0.999969	0.863232	0.999983	1.04031	0.999777
C33C12.4	0.778891	0.999951	0.586579	0.999969	1.02739	0.999983	1.33945	0.999777
C33C12.7	0.58503	0.999951	0.720996	0.999969	1.46335	0.999983	1.19367	0.999777
C33D3.3	2.06896	0.999951	1.09653	0.999969	0.540734	0.999983	1.03286	0.999777
C33D9.3	1.15247	0.999951	0.861611	0.999969	0.729529	0.999983	0.988154	0.999777
C33D9.6	0.888652	0.999951	1.92418	0.999969	0.887342	0.999983	0.41444	0.999777
C33D9.8	1.22814	0.999951	1.18846	0.999969	0.787347	0.999983	0.810645	0.999777
C33F10.1	0.784041	0.999951	1.02084	0.999969	1.49001	0.999983	1.11986	0.999777
C33F10.11	0.834779	0.999951	0.777509	0.999969	1.371	0.999983	1.44543	0.999777
C33F10.12	0.932848	0.999951	0.812068	0.999969	1.04662	0.999983	1.1922	0.999777
C33F10.14	0.894955	0.999951	0.984263	0.999969	1.14827	0.999983	1.04939	0.999777
C33F10.8	1.37299	0.999951	0.504741	0.999969	0.564042	0.999983	1.52385	0.999777
C33G3.4	1.66235	0.999951	0.683056	0.999969	0.817521	0.999983	1.99579	0.999777
C33G3.6	2.06985	0.999951	1.51058	0.999969	0.390156	0.999983	0.53092	0.999777
C33G8.2	1.12392	0.999951	3.04173	0.999969	1.25619	0.999983	0.464331	0.999777
C33G8.4	0.885888	0.999951	0.947741	0.999969	1.04555	0.999983	0.991029	0.999777
C33H5.13	0.991483	0.999951	1.56879	0.999969	1.29074	0.999983	0.819137	0.999777
C33H5.16	0.991743	0.999951	0.576315	0.999969	0.969285	0.999983	1.67128	0.999777
C34B2.11	1.33049	0.999951	1.05708	0.999969	0.744384	0.999983	0.94408	0.999777
C34B2.4	1.16783	0.999951	0.642401	0.999969	0.835123	0.999983	1.50579	0.999777
C34B2.8	1.06152	0.999951	0.823205	0.999969	0.93694	0.999983	1.21464	0.999777
C34B2.9	1.24095	0.999951	0.765964	0.999969	0.916602	0.999983	1.46911	0.999777
C34B4.2	1.04352	0.999951	1.03321	0.999969	0.847322	0.999983	0.861881	0.999777
C34B4.3	0.741601	0.999951	0.992989	0.999969	1.63669	0.999983	1.19636	0.999777
C34B4.4	1.02821	0.999951	1.03408	0.999969	0.865735	0.999983	0.867224	0.999777
C34B7.1	0.544066	0.999951	1.20577	0.999969	1.90094	0.999983	0.857129	0.999777
C34C12.2	0.948402	0.999951	1.15838	0.999969	1.01703	0.999983	0.834425	0.999777
C34C12.4	1.03863	0.999951	1.93022	0.999969	1.17773	0.999983	0.635298	0.999777
C34C12.6	1.21262	0.999951	0.713358	0.999969	0.525558	0.999983	0.903981	0.999777
C34C12.7	1.03103	0.999951	0.859405	0.999969	0.878285	0.999983	1.05987	0.999777
C34C12.8	1.07222	0.999951	0.921692	0.999969	1.0491	0.999983	1.22614	0.999777
C34C12.9	0.833187	0.999951	1.20749	0.999969	1.29074	0.999983	0.890274	0.999777
C34C6.3	0.685059	0.999951	0.660755	0.999969	1.21413	0.999983	1.29307	0.999777
C34C6.4	1.10654	0.999951	0.914221	0.999969	0.984785	0.999983	1.20003	0.999777
C34D1.4	0.70699	0.999951	1.0073	0.999969	0.638246	0.999983	0.455746	0.999777
C34D10.1	1.18158	0.999951	1.31286	0.999969	0.745304	0.999983	0.674136	0.999777
C34D4.2	1.11589	0.999951	0.625958	0.999969	0.75985	0.999983	1.35569	0.999777
C34D4.3	0.782111	0.999951	0.662903	0.999969	1.25957	0.999983	1.45938	0.999777
C34D4.4	1.06656	0.999951	1.07749	0.999969	0.950268	0.999983	0.94412	0.999777
C34E10.10	0.980087	0.999951	0.710223	0.999969	1.18553	0.999983	1.64499	0.999777
C34E11.2	1.23371	0.999951	0.749238	0.999969	0.945876	0.999983	1.55272	0.999777
C34E7.3	0.816089	0.999951	0.597703	0.999969	0.895307	0.999983	1.20798	0.999777
C34E7.4	1.25646	0.999951	0.754353	0.999969	0.966321	0.999983	1.61706	0.999777
C34F11.2	0.874007	0.999951	0.653875	0.999969	0.990695	0.999983	1.29646	0.999777
C34F11.5	0.734934	0.999951	0.831861	0.999969	1.2602	0.999983	1.1201	0.999777
C34F11.8	0.831522	0.999951	1.72631	0.999969	0.636006	0.999983	0.320527	0.0630398
C34F6.1	1.13569	0.999951	0.572494	0.999969	0.851984	0.999983	1.70336	0.999777
C34F6.10	0.925482	0.999951	0.772719	0.999969	0.845819	0.999983	1.02237	0.999777
C34F6.11	1.37783	0.999951	1.06724	0.999969	0.832436	0.999983	1.07855	0.999777
C34F6.5	1.43506	0.999951	1.0653	0.999969	0.963827	0.999983	1.30042	0.999777
C34F6.7	1.02416	0.999951	1.11673	0.999969	1.13597	0.999983	1.04948	0.999777
C34F6.9	0.950507	0.999951	1.04446	0.999969	0.943931	0.999983	0.870762	0.999777
C34H4.1	1.61796	0.999951	2.94809	0.999969	0.955608	0.999983	0.54307	0.999777
C34H4.2	0.970795	0.999951	1.14997	0.999969	1.24073	0.999983	1.05088	0.999777
C34H4.5	0.752806	0.999951	1.19465	0.999969	1.23186	0.999983	0.781701	0.999777
C35A11.2	1.14662	0.999951	1.02005	0.999969	0.517377	0.999983	0.588406	0.999777
C35A11.4	1.15454	0.999951	0.736086	0.999969	0.905296	0.999983	1.41553	0.999777
C35A5.10	0.513563	0.999951	0.793041	0.999969	2.64011	0.999983	1.67688	0.999777
C35A5.11	2.15983	0.999951	0.46293	0.999969	1.14318	0.999983	5.28669	0.706053
C35A5.3	1.05594	0.999951	0.70484	0.999969	0.972378	0.999983	1.45765	0.999777
C35A5.4	1.2809	0.999951	0.734115	0.999969	1.06838	0.999983	1.85185	0.999777
C35A5.8	1.21351	0.999951	0.946358	0.999969	0.939264	0.999983	1.2102	0.999777
C35B1.2	0.929999	0.999951	1.15186	0.999969	1.00648	0.999983	0.812776	0.999777
C35B1.4	2.01771	0.999951	5.95273	0.999969	1.17093	0.999983	0.377769	0.999777
C35B1.5	1.15099	0.999951	0.921406	0.999969	1.01461	0.999983	1.27347	0.999777
C35B1.7	0.77403	0.999951	0.715908	0.999969	0.775724	0.999983	0.848801	0.999777
C35B8.3	1.43482	0.999951	1.36321	0.999969	0.832934	0.999983	0.892799	0.999777
C35C5.10	1.09872	0.999951	0.830439	0.999969	0.819854	0.999983	1.08964	0.999777
C35C5.8	2.50839	0.999951	1.93761	0.999969	0.558041	0.999983	0.73069	0.999777
C35C5.9	0.95652	0.999951	1.41217	0.999969	1.31345	0.999983	0.904	0.999777
C35D10.1	1.01428	0.999951	1.02404	0.999969	1.05584	0.999983	1.05018	0.999777
C35D10.10	0.892748	0.999951	1.03553	0.999969	1.1399	0.999983	0.987262	0.999777
C35D10.17	1.04674	0.999951	1.13604	0.999969	0.949839	0.999983	0.881079	0.999777
C35D10.5	0.898773	0.999951	1.01048	0.999969	1.08809	0.999983	0.973506	0.999777
C35D10.6	0.895901	0.999951	0.959559	0.999969	1.07844	0.999983	1.00966	0.999777
C35D10.7	0.956802	0.999951	1.23291	0.999969	1.18564	0.999983	0.922502	0.999777
C35D10.8	0.854997	0.999951	0.760895	0.999969	1.26252	0.999983	1.42892	0.999777
C35E7.10	1.6829	0.999951	0.698328	0.999969	0.663751	0.999983	1.60054	0.999777
C35E7.11	1.30174	0.999951	0.959847	0.999969	0.638631	0.999983	0.874133	0.999777
C35E7.2	0.697595	0.999951	0.947026	0.999969	1.1581	0.999983	0.880285	0.999777
C35E7.8	0.965476	0.999951	0.892836	0.999969	1.076	0.999983	1.16667	0.999777
C35E7.9	0.887765	0.999951	0.703996	0.999969	0.90638	0.999983	1.13109	0.999777
C36A4.4	0.891305	0.999951	1.32012	0.999969	1.23545	0.999983	0.83541	0.999777
C36B1.11	0.891004	0.999951	1.41346	0.999969	1.2383	0.999983	0.775642	0.999777
C36B1.14	0.718218	0.999951	1.07954	0.999969	1.42952	0.999983	0.952542	0.999777
C36B1.6	1.04276	0.999951	1.58511	0.999969	1.08922	0.999983	0.719628	0.999777
C36B7.6	1.2748	0.999951	1.12749	0.999969	0.855559	0.999983	0.974705	0.999777
C36C5.12	1.0056	0.999951	0.700391	0.999969	1.03981	0.999983	1.5077	0.999777
C36C5.14	0.953357	0.999951	0.489804	0.999969	1.40932	0.999983	2.76227	0.999777
C36C5.15	1.16986	0.999951	0.216628	0.999969	1.11954	0.999983	6.00815	0.826146
C36C5.5	0.915201	0.999951	0.709267	0.999969	0.976207	0.999983	1.26958	0.999777
C36C9.10	0.869405	0.999951	1.01262	0.999969	1.40669	0.999983	1.21004	0.999777
C36E6.2	1.12068	0.999951	0.687592	0.999969	0.519812	0.999983	0.852399	0.999777
C36E6.8	0.864062	0.999951	0.674059	0.999969	1.1304	0.999983	1.44193	0.999777
C36E8.1	0.863506	0.999951	1.02065	0.999969	1.20107	0.999983	1.02069	0.999777
C36H8.1	1.24176	0.999951	0.73395	0.999969	0.841269	0.999983	1.40292	0.999777
C37A2.6	0.873073	0.999951	0.696288	0.999969	0.873088	0.999983	1.09723	0.999777
C37A2.7	1.15384	0.999951	0.886108	0.999969	0.893337	0.999983	1.16824	0.999777
C37A2.8	1.14327	0.999951	1.23662	0.999969	1.02237	0.999983	0.94502	0.999777
C37A2.9	1.21958	0.999951	1.12217	0.999969	0.965793	0.999983	1.05595	0.999777
C37A5.11	1.14543	0.999951	0.954796	0.999969	0.759681	0.999983	0.918566	0.999777
C37A5.7	0.556507	0.999951	1.56759	0.999969	1.74485	0.999983	0.621569	0.999777
C37C3.1	1.0272	0.999951	1.00293	0.999969	0.994366	0.999983	1.02264	0.999777
C37C3.11	0.993832	0.999951	0.933617	0.999969	1.16609	0.999983	1.2489	0.999777
C37C3.12	0.771715	0.999951	1.61755	0.999969	1.27756	0.999983	0.639729	0.999777
C37C3.2	0.964906	0.999951	0.945089	0.999969	0.869494	0.999983	0.891355	0.999777
C37C3.7	0.999025	0.999951	1.09504	0.999969	0.776297	0.999983	0.705795	0.999777
C37C3.9	0.905185	0.999951	1.52301	0.999969	1.39066	0.999983	0.812101	0.999777
C37E2.2	0.914665	0.999951	0.659582	0.999969	0.795053	0.999983	1.13432	0.999777
C37H5.13	1.21853	0.999951	1.15834	0.999969	0.742317	0.999983	0.785132	0.999777
C37H5.14	0.988957	0.999951	0.772321	0.999969	1.15975	0.999983	1.49431	0.999777
C37H5.5	0.874082	0.999951	0.834864	0.999969	1.17101	0.999983	1.24114	0.999777
C38C10.3	1.35504	0.999951	0.748019	0.999969	0.777191	0.999983	1.39489	0.999777
C38C6.3	1.56003	0.999951	0.648414	0.999969	0.64115	0.999983	1.49058	0.999777
C38D4.10	0.911774	0.999951	0.811418	0.999969	1.16382	0.999983	1.31115	0.999777
C38D4.4	0.742276	0.999951	1.25207	0.999969	1.58799	0.999983	0.946465	0.999777
C38D4.7	1.26855	0.999951	0.797244	0.999969	0.67642	0.999983	1.06799	0.999777
C38H2.2	1.27857	0.999951	1.38477	0.999969	0.983404	0.999983	0.909277	0.999777
C38H2.3	0.876226	0.999951	1.2621	0.999969	0.890483	0.999983	0.631864	0.999777
C39B10.1	1.64793	0.999951	1.61563	0.999969	0.636695	0.999983	0.66425	0.999777
C39B5.5	0.819266	0.999951	0.965652	0.999969	2.32787	0.999983	1.93524	0.999777
C39D10.11	0.853208	0.999951	1.05796	0.999969	1.12587	0.999983	0.923599	0.999777
C39D10.2	0.630835	0.999951	0.82157	0.999969	0.864436	0.999983	0.6724	0.999777
C39D10.5	0.683235	0.999951	1.0541	0.999969	0.963997	0.999983	0.630269	0.999777
C39D10.8	1.14613	0.999951	1.02506	0.999969	0.886891	0.999983	1.02133	0.999777
C39E9.12	1.13042	0.999951	1.38206	0.999969	1.07454	0.999983	0.877285	0.999777
C39E9.7	1.0405	0.999951	1.21121	0.999969	0.801265	0.999983	0.690008	0.999777
C39E9.8	0.837045	0.999951	1.2357	0.999969	0.919783	0.999983	0.627	0.999777
C39F7.1	1.6146	0.999951	1.2627	0.999969	0.459263	0.999983	0.590497	0.999777
C39H7.1	1.47058	0.999951	0.80194	0.999969	0.730247	0.999983	1.3316	0.999777
C39H7.4	0.820863	0.999951	0.921164	0.999969	1.11001	0.999983	0.995151	0.999777
C40H1.7	1.62204	0.999951	2.48675	0.999969	0.945129	0.999983	0.612141	0.999777
C40H1.8	1.17243	0.999951	0.350551	0.999969	0.295	0.999983	1.00737	0.999777
C41A3.2	1.72892	0.999951	1.39024	0.999969	0.738759	0.999983	0.924555	0.999777
C41D11.3	0.828806	0.999951	1.05069	0.999969	1.03384	0.999983	0.821657	0.999777
C41D11.9	0.895839	0.999951	1.36718	0.999969	1.28532	0.999983	0.842378	0.999777
C41G7.6	0.817091	0.999951	0.693989	0.999969	1.38189	0.999983	1.57987	0.999777
C41G7.9	0.96139	0.999951	0.98028	0.999969	1.05735	0.999983	1.04299	0.999777
C42C1.12	0.831197	0.999951	0.847017	0.999969	1.09048	0.999983	1.07507	0.999777
C42C1.13	0.837052	0.999951	1.09548	0.999969	1.25394	0.999983	0.952326	0.999777
C42C1.19	1.14853	0.999951	1.18355	0.999969	0.980815	0.999983	0.954852	0.999777
C42C1.3	0.882184	0.999951	0.514845	0.999969	1.16725	0.999983	1.9854	0.999777
C42C1.8	1.068	0.999951	1.12612	0.999969	1.07819	0.999983	1.00597	0.999777
C42C1.9	0.72663	0.999951	0.89099	0.999969	1.41059	0.999983	1.14432	0.999777
C42D4.1	1.08184	0.999951	1.14241	0.999969	1.06306	0.999983	1.02193	0.999777
C42D4.13	0.814805	0.999951	1.23161	0.999969	1.2397	0.999983	0.801807	0.999777
C42D4.18	0.887275	0.999951	1.86598	0.999969	1.25276	0.999983	0.613654	0.999777
C42D4.3	0.713019	0.999951	1.8532	0.999969	2.88696	0.999983	1.1076	0.999777
C42D8.1	0.680393	0.999951	0.806852	0.999969	1.24343	0.999983	1.05995	0.999777
C43E11.12	0.664517	0.999951	1.18611	0.999969	1.39841	0.999983	0.785797	0.999777
C43E11.5	1.3472	0.999951	0.675515	0.999969	0.684418	0.999983	1.36067	0.999777
C43E11.9	1.04364	0.999951	0.70239	0.999969	1.03337	0.999983	1.53982	0.999777
C43F9.11	1.31702	0.999951	0.91956	0.999969	0.932112	0.999983	1.2317	0.999777
C43F9.5	0.65138	0.999951	0.829032	0.999969	1.1019	0.999983	0.886687	0.999777
C43H6.4	1.18038	0.999951	0.921819	0.999969	0.8096	0.999983	1.04697	0.999777
C44B11.4	0.963953	0.999951	0.98302	0.999969	0.742652	0.999983	0.732426	0.999777
C44B11.6	0.808588	0.999951	1.52022	0.999969	0.986004	0.999983	0.531751	0.999777
C44B12.6	0.994662	0.999951	1.1527	0.999969	0.83826	0.999983	0.712479	0.999777
C44B7.11	1.17717	0.999951	0.863502	0.999969	0.960161	0.999983	1.32178	0.999777
C44B7.5	2.65894	0.999951	19.3484	0.198081	1.57949	0.999983	0.219786	0.999777
C44B7.7	1.07202	0.999951	0.772967	0.999969	0.899246	0.999983	1.25317	0.999777
C44B9.2	1.19065	0.999951	0.659399	0.999969	0.685285	0.999983	1.23956	0.999777
C44B9.3	0.746938	0.999951	1.5884	0.999969	2.20851	0.999983	1.01474	0.999777
C44C1.1	1.26098	0.999951	1.067	0.999969	0.929268	0.999983	1.107	0.999777
C44C1.6	0.941169	0.999951	2.01583	0.999969	0.784639	0.999983	0.380821	0.263217
C44C10.11	1.19113	0.999951	0.722085	0.999969	0.674234	0.999983	1.11872	0.999777
C44C10.9	1.02371	0.999951	1.1241	0.999969	1.05105	0.999983	0.961985	0.999777
C44E12.1	1.10165	0.999951	1.4103	0.999969	0.613097	0.999983	0.515263	0.999777
C44E4.5	0.924514	0.999951	1.17602	0.999969	1.23467	0.999983	0.974288	0.999777
C44F1.1	0.915997	0.999951	0.595335	0.999969	0.690199	0.999983	1.07147	0.999777
C44H4.4	1.18813	0.999951	0.90239	0.999969	0.777058	0.999983	1.01924	0.999777
C44H9.6	0.740945	0.999951	1.55913	0.999969	1.28233	0.999983	0.615943	0.999777
C45B11.5	1.47362	0.999951	0.840138	0.999969	0.881349	0.999983	1.48992	0.999777
C45B11.6	2.38751	0.999951	0.786634	0.999969	0.231461	0.999983	0.698713	0.999777
C45B11.8	0.70845	0.999951	0.772917	0.999969	1.22167	0.999983	1.09312	0.999777
C45B11.9	0.63197	0.999951	1.15763	0.999969	2.14673	0.999983	1.1724	0.999777
C45B2.1	3.81996	0.999951	37.0155	0.000102852	3.5424	0.999983	0.380981	0.999777
C45B2.2	1.3682	0.999951	0.760686	0.999969	0.752639	0.999983	1.37193	0.999777
C45B2.6	0.619865	0.999951	0.956363	0.999969	1.44197	0.999983	0.962258	0.999777
C45B2.8	4.35281	0.999951	2.09177	0.999969	0.236242	0.999983	0.485427	0.999777
C45E1.4	0.632398	0.999951	1.2457	0.999969	1.29782	0.999983	0.672486	0.999777
C45E5.1	0.534173	0.999951	0.602862	0.999969	1.00968	0.999983	0.907346	0.999777
C45E5.4	0.799082	0.999951	1.69842	0.999969	0.930033	0.999983	0.461236	0.999777
C45G3.3	0.894649	0.999951	0.911956	0.999969	1.17831	0.999983	1.16337	0.999777
C45G7.4	1.17974	0.999951	1.48472	0.999969	0.75187	0.999983	0.600721	0.999777
C45G9.12	0.64696	0.999951	0.526949	0.999969	1.11712	0.999983	1.41523	0.999777
C45G9.2	1.04285	0.999951	1.19554	0.999969	1.10196	0.999983	0.961445	0.999777
C45G9.4	1.03786	0.999951	0.777	0.999969	0.8801	0.999983	1.17028	0.999777
C45G9.5	0.904212	0.999951	0.837713	0.999969	1.09768	0.999983	1.19092	0.999777
C45G9.6	0.762629	0.999951	2.7912	0.999969	0.985939	0.999983	0.275212	0.0887845
C45G9.9	0.876675	0.999951	0.820038	0.999969	1.09808	0.999983	1.16962	0.999777
C46A5.6	0.859049	0.999951	0.820227	0.999969	1.25775	0.999983	1.32117	0.999777
C46C11.3	1.09317	0.999951	0.810557	0.999969	0.77742	0.999983	1.0553	0.999777
C46C2.2	1.22402	0.999951	1.07518	0.999969	0.7353	0.999983	0.845167	0.999777
C46C2.7	0.895327	0.999951	0.989976	0.999969	1.21257	0.999983	1.10705	0.999777
C46E10.1	0.547566	0.999951	0.748104	0.999969	1.5878	0.999983	1.1488	0.999777
C46F11.4	1.02945	0.999951	1.01879	0.999969	0.881029	0.999983	0.893354	0.999777
C46F11.5	1.01717	0.999951	1.32304	0.999969	0.95114	0.999983	0.733545	0.999777
C46F11.6	1.17051	0.999951	1.18137	0.999969	0.812171	0.999983	0.808769	0.999777
C46F2.1	0.937959	0.999951	0.695825	0.999969	1.039	0.999983	1.40921	0.999777
C46G7.1	1.15155	0.999951	0.840379	0.999969	1.02095	0.999983	1.40584	0.999777
C46G7.2	0.838082	0.999951	0.585128	0.999969	0.915418	0.999983	1.31947	0.999777
C46H11.10	0.914104	0.999951	1.29564	0.999969	1.21062	0.999983	0.864491	0.999777
C46H11.6	0.80871	0.999951	0.718998	0.999969	1.08939	0.999983	1.22198	0.999777
C46H11.7	1.10333	0.999951	0.490298	0.999969	0.996815	0.999983	2.18073	0.999777
C46H3.2	1.04727	0.999951	0.840959	0.999969	0.653597	0.999983	0.824879	0.999777
C47A4.3	1.13038	0.999951	0.724401	0.999969	1.03434	0.999983	1.57115	0.999777
C47A4.5	1.18672	0.999951	0.965411	0.999969	0.923927	0.999983	1.12045	0.999777
C47B2.2	0.998596	0.999951	0.959043	0.999969	1.14655	0.999983	1.19877	0.999777
C47B2.9	1.07113	0.999951	0.745201	0.999969	0.788239	0.999983	1.14354	0.999777
C47D12.2	1.2057	0.999951	1.12575	0.999969	0.843537	0.999983	0.908027	0.999777
C47D12.5	0.805316	0.999951	2.05958	0.999969	1.38678	0.999983	0.544009	0.999777
C47D2.1	0.783744	0.999951	1.29954	0.999969	0.83087	0.999983	0.506963	0.999777
C47E12.10	0.993976	0.999951	0.775707	0.999969	1.12987	0.999983	1.42111	0.999777
C47E12.11	0.640999	0.999951	0.728158	0.999969	1.28699	0.999983	1.1182	0.999777
C47E12.12	0.594112	0.999951	0.556512	0.999969	0.888538	0.999983	0.953376	0.999777
C47E12.2	0.617159	0.999951	1.02151	0.999969	1.5559	0.999983	0.947689	0.999777
C47E12.3	1.19537	0.999951	1.23265	0.999969	0.843497	0.999983	0.820551	0.999777
C47E8.11	0.891441	0.999951	0.723309	0.999969	1.14664	0.999983	1.41183	0.999777
C47E8.3	1.00571	0.999951	1.10386	0.999969	0.835403	0.999983	0.768835	0.999777
C47E8.4	0.943828	0.999951	1.17632	0.999969	1.15377	0.999983	0.927486	0.999777
C47G2.3	0.913173	0.999951	0.785067	0.999969	1.01353	0.999983	1.18481	0.999777
C47G2.4	0.775783	0.999951	1.32986	0.999969	1.21738	0.999983	0.715701	0.999777
C48A7.9	4.39355	0.999951	1.56782	0.999969	0.287233	0.999983	0.795302	0.999777
C48B4.10	1.12808	0.999951	0.693637	0.999969	1.1211	0.999983	1.82737	0.999777
C48B4.11	0.829192	0.999951	0.870823	0.999969	0.995612	0.999983	0.951015	0.999777
C48B4.13	0.979638	0.999951	0.856147	0.999969	1.1787	0.999983	1.36058	0.999777
C48B4.6	0.957933	0.999951	1.163	0.999969	1.20818	0.999983	0.99746	0.999777
C48B4.7	0.708402	0.999951	1.05346	0.999969	1.22133	0.999983	0.820935	0.999777
C48B4.8	0.817607	0.999951	1.13784	0.999969	1.282	0.999983	0.923071	0.999777
C48B4.9	0.743494	0.999951	0.72067	0.999969	0.806104	0.999983	0.829743	0.999777
C48B6.10	1.02511	0.999951	0.916796	0.999969	1.15765	0.999983	1.30302	0.999777
C48B6.2	1.03276	0.999951	0.746216	0.999969	0.905128	0.999983	1.25497	0.999777
C48B6.3	0.959214	0.999951	1.0143	0.999969	1.23891	0.999983	1.17366	0.999777
C48B6.9	0.67771	0.999951	0.894442	0.999969	1.14997	0.999983	0.877741	0.999777
C48D1.9	0.920366	0.999951	0.686949	0.999969	1.08235	0.999983	1.44322	0.999777
C48D5.3	1.53355	0.999951	0.654921	0.999969	0.655722	0.999983	1.54022	0.999777
C48E7.1	1.01229	0.999951	1.0153	0.999969	0.937253	0.999983	0.943971	0.999777
C48E7.6	1.34782	0.999951	1.01705	0.999969	0.556068	0.999983	0.739692	0.999777
C48E7.7	0.948407	0.999951	1.35821	0.999969	1.44095	0.999983	1.00371	0.999777
C49A1.10	1.02336	0.999951	0.911557	0.999969	0.997368	0.999983	1.13279	0.999777
C49A9.10	0.870839	0.999951	0.946454	0.999969	1.17344	0.999983	1.07882	0.999777
C49A9.2	1.51077	0.999951	0.811793	0.999969	0.580496	0.999983	1.07466	0.999777
C49A9.3	1.04027	0.999951	0.815958	0.999969	0.790052	0.999983	1.017	0.999777
C49A9.4	1.29458	0.999951	1.17182	0.999969	0.761747	0.999983	0.846212	0.999777
C49A9.5	1.09901	0.999951	1.22256	0.999969	1.15139	0.999983	1.06154	0.999777
C49A9.6	0.992802	0.999951	1.43355	0.999969	0.786589	0.999983	0.54816	0.999777
C49A9.9	1.11956	0.999951	1.49267	0.999969	0.89112	0.999983	0.669785	0.999777
C49C3.20	1.22944	0.999951	0.956023	0.999969	1.00171	0.999983	1.2653	0.999777
C49C3.4	1.10472	0.999951	1.05306	0.999969	0.919839	0.999983	0.970262	0.999777
C49C3.6	0.934703	0.999951	0.960737	0.999969	1.06816	0.999983	1.03413	0.999777
C49C3.7	0.754837	0.999951	0.826258	0.999969	1.16383	0.999983	1.06585	0.999777
C49C3.9	0.553763	0.999951	0.97171	0.999969	1.47498	0.999983	0.859467	0.999777
C49C8.2	1.57269	0.999951	1.85982	0.999969	0.648143	0.999983	0.549135	0.999777
C49C8.5	0.759941	0.999951	0.762872	0.999969	0.927592	0.999983	0.92968	0.999777
C49F5.7	1.57088	0.999951	2.28878	0.999969	1.18173	0.999983	0.837109	0.999777
C49F8.1	0.488872	0.999951	0.529811	0.999969	1.79901	0.999983	1.57747	0.999777
C49F8.3	0.8342	0.999951	0.530043	0.999969	1.06214	0.999983	1.67473	0.999777
C49G7.10	1.93669	0.999951	4.09638	0.0068878	0.998155	0.999983	0.471136	0.921245
C49G7.12	1.71485	0.999951	4.31388	0.151553	2.60588	0.999983	1.03221	0.999777
C49G7.3	0.96947	0.999951	0.862672	0.999969	0.837814	0.999983	0.952878	0.999777
C49G9.2	1.55104	0.999951	1.60572	0.999969	0.694994	0.999983	0.677083	0.999777
C49H3.16	1.18408	0.999951	0.652195	0.999969	0.645068	0.999983	1.12357	0.999777
C49H3.3	0.926241	0.999951	0.695601	0.999969	1.06091	0.999983	1.41874	0.999777
C49H3.4	1.05987	0.999951	1.22536	0.999969	1.0624	0.999983	0.905459	0.999777
C49H3.6	0.726143	0.999951	1.0561	0.999969	1.46049	0.999983	1.00787	0.999777
C49H3.9	0.945656	0.999951	0.8957	0.999969	1.00558	0.999983	1.0658	0.999777
C50A2.3	0.366783	0.999951	0.383061	0.766816	0.63821	0.999983	0.609942	0.999777
C50B6.3	0.876213	0.999951	1.46582	0.999969	1.47583	0.999983	0.882232	0.999777
C50B6.7	1.97511	0.999951	0.813041	0.999969	0.816664	0.999983	2.01863	0.999777
C50B6.9	1.20314	0.999951	0.774518	0.999969	0.832664	0.999983	1.30242	0.999777
C50B8.4	0.705975	0.999951	1.03351	0.999969	1.19752	0.999983	0.822463	0.999777
C50B8.5	0.882248	0.999951	0.962864	0.999969	0.928449	0.999983	0.857415	0.999777
C50B8.6	0.998656	0.999951	1.04631	0.999969	1.07403	0.999983	1.027	0.999777
C50C3.1	0.811844	0.999951	1.14329	0.999969	1.46852	0.999983	1.04341	0.999777
C50C3.5	0.996299	0.999951	0.790713	0.999969	0.934522	0.999983	1.18839	0.999777
C50D2.1	1.25521	0.999951	0.778444	0.999969	0.652277	0.999983	1.03257	0.999777
C50D2.10	0.979864	0.999951	0.946026	0.999969	0.955333	0.999983	0.989783	0.999777
C50D2.2	0.86213	0.999951	0.652301	0.999969	0.956192	0.999983	1.25935	0.999777
C50D2.5	0.882969	0.999951	0.804775	0.999969	1.04325	0.999983	1.15032	0.999777
C50D2.6	1.15577	0.999951	4.02228	0.150896	0.515957	0.999983	0.148272	0.000420812
C50D2.7	0.864637	0.999951	1.18335	0.999969	1.08592	0.999983	0.798727	0.999777
C50D2.8	0.824573	0.999951	1.01217	0.999969	1.02295	0.999983	0.8371	0.999777
C50D2.9	0.939876	0.999951	0.897068	0.999969	1.12433	0.999983	1.18519	0.999777
C50E10.1	1.08173	0.999951	1.06253	0.999969	1.25595	0.999983	1.26051	0.999777
C50E10.2	0.75581	0.999951	0.608462	0.999969	1.0903	0.999983	1.34795	0.999777
C50E3.5	0.942538	0.999951	1.30141	0.999969	0.867004	0.999983	0.627096	0.999777
C50F2.2	1.45228	0.999951	1.57634	0.999969	0.834777	0.999983	0.761532	0.999777
C50F2.4	1.1242	0.999951	0.658954	0.999969	0.627211	0.999983	1.07381	0.999777
C50F2.5	1.10359	0.999951	0.626189	0.999969	0.833419	0.999983	1.46507	0.999777
C50F2.7	0.819989	0.999951	0.914311	0.999969	1.28657	0.999983	1.1771	0.999777
C50F4.1	1.75606	0.999951	1.56108	0.999969	0.716189	0.999983	0.826672	0.999777
C50F4.10	1.19555	0.999951	0.952047	0.999969	0.722016	0.999983	0.894699	0.999777
C50F4.12	1.15976	0.999951	1.15646	0.999969	1.30481	0.999983	1.29578	0.999777
C50F4.16	1.00925	0.999951	1.25718	0.999969	1.06458	0.999983	0.859564	0.999777
C50F4.4	0.938212	0.999951	0.99853	0.999969	1.16106	0.999983	1.09165	0.999777
C50F4.6	1.07283	0.999951	1.0174	0.999969	0.882433	0.999983	0.937226	0.999777
C50F4.8	1.25666	0.999951	1.06184	0.999969	1.12113	0.999983	1.35344	0.999777
C50F7.3	0.686465	0.999951	0.68253	0.999969	1.44786	0.999983	1.41289	0.999777
C51E3.10	1.4086	0.999951	1.06949	0.999969	1.10765	0.999983	1.47292	0.999777
C51E3.6	0.832361	0.999951	1.05286	0.999969	1.05901	0.999983	0.8447	0.999777
C51E3.9	0.990159	0.999951	0.613363	0.999969	0.814712	0.999983	1.32368	0.999777
C52B11.5	0.69673	0.999951	1.31312	0.999969	0.857494	0.999983	0.454906	0.849579
C52B9.4	1.18234	0.999951	1.22045	0.999969	0.799266	0.999983	0.780222	0.999777
C52D10.3	1.21716	0.999951	0.388025	0.999969	0.817456	0.999983	2.5792	0.999777
C52E4.13	0.997592	0.999951	1.18943	0.999969	0.623149	0.999983	0.526102	0.999777
C52E4.7	1.04295	0.999951	1.06306	0.999969	1.08717	0.999983	1.05135	0.999777
C52G5.2	1.11311	0.999951	0.623413	0.999969	0.890111	0.999983	1.59353	0.999777
C53A5.13	0.869251	0.999951	1.21127	0.999969	1.14319	0.999983	0.839882	0.999777
C53A5.16	0.878603	0.999951	0.860308	0.999969	1.09479	0.999983	1.12144	0.999777
C53A5.17	0.999125	0.999951	1.17599	0.999969	1.17137	0.999983	1.00005	0.999938
C53A5.6	0.983297	0.999951	1.37446	0.999969	1.19618	0.999983	0.859791	0.999777
C53B4.2	0.865247	0.999951	0.567844	0.999969	0.912625	0.999983	1.39898	0.999777
C53B4.3	0.998849	0.999951	1.16057	0.999969	0.990086	0.999983	0.856653	0.999777
C53B4.4	1.00616	0.999951	1.33442	0.999969	1.17254	0.999983	0.885931	0.999777
C53B7.2	1.56556	0.999951	2.80466	0.999969	1.23406	0.999983	0.679408	0.999777
C53B7.3	0.781819	0.999951	2.26156	0.999969	0.827676	0.999983	0.296412	0.0896346
C53C11.2	1.27977	0.999951	0.720369	0.999969	0.720506	0.999983	1.28101	0.999777
C53C11.5	1.20877	0.999951	0.898972	0.999969	0.80216	0.999983	1.08637	0.999777
C53D5.1	0.827403	0.999951	0.852279	0.999969	0.951137	0.999983	0.926699	0.999777
C53D5.5	1.01732	0.999951	1.04986	0.999969	1.32404	0.999983	1.28871	0.999777
C53D6.10	0.656993	0.999951	0.734466	0.999969	1.63989	0.999983	1.40197	0.999777
C53D6.11	1.14425	0.999951	1.62665	0.999969	1.00207	0.999983	0.70967	0.999777
C53D6.4	0.97293	0.999951	1.13324	0.999969	1.056	0.999983	0.908183	0.999777
C53D6.7	0.931037	0.999951	1.27329	0.999969	1.54978	0.999983	1.16029	0.999777
C53H9.2	1.09216	0.999951	0.879277	0.999969	0.936762	0.999983	1.16576	0.999777
C53H9.3	0.816339	0.999951	0.688985	0.999969	1.08687	0.999983	1.29756	0.999777
C54C6.5	0.975373	0.999951	1.01897	0.999969	0.754977	0.999983	0.730873	0.999777
C54C6.6	0.865566	0.999951	1.2686	0.999969	1.47768	0.999983	1.0115	0.999777
C54D1.7	1.11222	0.999951	1.11125	0.999969	0.821896	0.999983	0.850466	0.999777
C54D10.10	0.777479	0.999951	1.03241	0.999969	3.33737	0.999983	2.55799	0.999777
C54D10.13	1.36511	0.999951	1.49116	0.999969	0.985173	0.999983	0.908684	0.999777
C54D10.3	1.00852	0.999951	1.0924	0.999969	0.881287	0.999983	0.819337	0.999777
C54D10.4	0.57944	0.999951	0.586192	0.999969	1.69798	0.999983	1.64756	0.999777
C54D2.2	0.799112	0.999951	0.833688	0.999969	1.10492	0.999983	1.06787	0.999777
C54E10.6	1.12252	0.999951	1.16634	0.999969	0.922096	0.999983	0.895485	0.999777
C54E4.4	0.986847	0.999951	1.12442	0.999969	0.972119	0.999983	0.87549	0.999777
C54E4.5	1.57269	0.999951	4.62258	0.01698	0.828495	0.999983	0.283418	0.106697
C54F6.3	1.24144	0.999951	0.4911	0.999969	0.619379	0.999983	1.53101	0.999777
C54G4.2	1.12967	0.999951	0.860418	0.999969	0.691198	0.999983	0.879325	0.999777
C54G4.3	0.819499	0.999951	0.7175	0.999969	1.27275	0.999983	1.43539	0.999777
C54G4.4	0.690219	0.999951	0.785321	0.999969	1.78766	0.999983	1.63476	0.999777
C54G4.7	0.879933	0.999951	1.14845	0.999969	0.992552	0.999983	0.763768	0.999777
C54G4.9	0.848565	0.999951	1.20486	0.999969	1.37446	0.999983	0.971898	0.999777
C54G6.3	0.747328	0.999951	0.992757	0.999969	1.6842	0.999983	1.27263	0.999777
C54G6.8	0.231568	0.999951	0.555518	0.999969	4.21989	0.999983	1.73702	0.999777
C54H2.4	0.915705	0.999951	0.857642	0.999969	0.945164	0.999983	1.00703	0.999777
C55A6.1	0.986541	0.999951	1.34689	0.999969	1.27066	0.999983	0.931725	0.999777
C55A6.10	0.977054	0.999951	0.957674	0.999969	0.981058	0.999983	1.00412	0.999777
C55A6.11	0.836907	0.999951	0.708189	0.999969	1.18814	0.999983	1.40256	0.999777
C55A6.12	0.847716	0.999951	0.843686	0.999969	1.26827	0.999983	1.27357	0.999777
C55A6.3	1.51864	0.999951	0.903859	0.999969	0.798101	0.999983	1.33531	0.999777
C55A6.4	1.40178	0.999951	0.938848	0.999969	0.735777	0.999983	1.10981	0.999777
C55A6.6	1.15537	0.999951	1.29441	0.999969	0.80832	0.999983	0.747345	0.999777
C55A6.7	0.970073	0.999951	0.980064	0.999969	1.69668	0.999983	1.69685	0.999777
C55B6.1	0.407344	0.999951	1.71113	0.999969	1.79634	0.999983	0.427309	0.999777
C55B7.10	0.909135	0.999951	0.542416	0.999969	1.15595	0.999983	1.89669	0.999777
C55B7.11	0.892165	0.999951	0.89561	0.999969	1.25819	0.999983	1.25347	0.999777
C55B7.3	0.576208	0.999951	0.53605	0.999969	1.19772	0.999983	1.29103	0.999777
C55C2.4	0.917148	0.999951	0.712016	0.999969	0.904663	0.999983	1.13996	0.999777
C55C3.3	1.06138	0.999951	0.90319	0.999969	0.93976	0.999983	1.08686	0.999777
C56A3.4	0.852295	0.999951	1.45311	0.999969	1.16452	0.999983	0.68376	0.999777
C56A3.5	0.934299	0.999951	1.20114	0.999969	1.20486	0.999983	0.939349	0.999777
C56A3.6	1.11843	0.999951	1.19475	0.999969	0.902988	0.999983	0.846538	0.999777
C56A3.8	0.848961	0.999951	0.788739	0.999969	0.905049	0.999983	0.975992	0.999777
C56C10.4	0.968705	0.999951	0.649309	0.999969	0.91775	0.999983	1.36137	0.999777
C56C10.7	1.01626	0.999951	1.04353	0.999969	1.13059	0.999983	1.10596	0.999777
C56C10.9	1.35635	0.999951	1.37548	0.999969	0.675504	0.999983	0.667035	0.999777
C56E6.2	1.13377	0.999951	0.629832	0.999969	0.672783	0.999983	1.20912	0.999777
C56G2.15	3.30463	0.999951	1.49193	0.999969	0.263277	0.366075	0.581251	0.999777
C56G2.3	0.987056	0.999951	0.7088	0.999969	1.28593	0.999983	1.78854	0.999777
C56G2.4	0.943097	0.999951	0.766775	0.999969	0.985988	0.999983	1.22825	0.999777
C56G2.5	1.1482	0.999951	0.773398	0.999969	0.755114	0.999983	1.1147	0.999777
C56G7.3	0.719661	0.999951	0.864507	0.999969	1.17276	0.999983	0.98087	0.999777
cab-1	0.92358	0.999951	1.01112	0.999969	0.682059	0.999983	0.626557	0.999777
cacn-1	1.11399	0.999951	0.986946	0.999969	1.06104	0.999983	1.21002	0.999777
cah-1	0.893857	0.999951	1.07038	0.999969	0.690621	0.999983	0.576436	0.999777
cah-2	0.799935	0.999951	0.86531	0.999969	1.09204	0.999983	1.02532	0.999777
cah-3	1.21169	0.999951	1.10842	0.999969	0.974095	0.999983	1.07535	0.999777
cah-4	1.50733	0.999951	0.746957	0.999969	0.465807	0.999983	0.944963	0.999777
cah-5	1.28341	0.999951	1.02708	0.999969	0.796671	0.999983	0.999968	0.999938
cah-6	0.881893	0.999951	0.759924	0.999969	0.863862	0.999983	1.00591	0.999777
cal-1	1.08957	0.999951	1.16153	0.999969	0.916801	0.999983	0.871529	0.999777
cal-2	0.689953	0.999951	0.792593	0.999969	0.748736	0.999983	0.66064	0.999777
cal-3	1.15952	0.999951	1.16266	0.999969	0.684324	0.999983	0.6895	0.999777
cal-4	0.662996	0.999951	0.93075	0.999969	1.0539	0.999983	0.759209	0.999777
cal-5	1.63065	0.999951	1.65142	0.999969	0.957441	0.999983	0.953369	0.999777
cal-8	0.820445	0.999951	0.76692	0.999969	1.03873	0.999983	1.12038	0.999777
calm-1	0.944739	0.999951	0.736237	0.999969	0.801338	0.999983	1.03653	0.999777
calu-1	1.4254	0.999951	1.23401	0.999969	0.977462	0.999983	1.13692	0.999777
calu-2	1.02098	0.999951	0.894169	0.999969	0.885479	0.999983	1.01447	0.999777
cam-1	0.742518	0.999951	1.06023	0.999969	1.42952	0.999983	1.01047	0.999777
camt-1	0.985141	0.999951	1.10279	0.999969	0.686484	0.999983	0.624344	0.999777
cand-1	0.957843	0.999951	1.05712	0.999969	1.29937	0.999983	1.18429	0.999777
cap-1	0.950133	0.999951	0.876699	0.999969	1.04998	0.999983	1.14357	0.999777
cap-2	0.968198	0.999951	1.13474	0.999969	0.931338	0.999983	0.797375	0.999777
capa-1	0.852016	0.999951	1.46614	0.999969	0.793106	0.999983	0.466914	0.999777
capg-1	1.22053	0.999951	1.1124	0.999969	0.943932	0.999983	1.03939	0.999777
capg-2	1.0666	0.999951	1.06286	0.999969	1.06985	0.999983	1.07813	0.999777
car-1	0.97239	0.999951	1.33352	0.999969	1.311	0.999983	0.957086	0.999777
cars-1	1.15146	0.999951	0.92532	0.999969	0.963583	0.999983	1.2061	0.999777
cas-1	0.942761	0.999951	1.06957	0.999969	1.07398	0.999983	0.953239	0.999777
cas-2	1.01027	0.999951	1.18241	0.999969	1.17639	0.999983	1.00537	0.999777
cash-1	1.10505	0.999951	1.05546	0.999969	0.919581	0.999983	0.965841	0.999777
casy-1	0.855765	0.999951	0.886375	0.999969	0.826723	0.999983	0.803857	0.999777
cat-4	0.87787	0.999951	1.16863	0.999969	1.1869	0.999983	0.896165	0.999777
catp-1	1.09045	0.999951	1.33829	0.999969	0.79306	0.999983	0.652322	0.999777
catp-3	0.649639	0.999951	0.994548	0.999969	0.6237	0.999983	0.411992	0.999777
catp-4	1.01252	0.999951	0.675475	0.999969	0.931922	0.999983	1.37196	0.999777
catp-5	0.779623	0.999951	0.97294	0.999969	1.6477	0.999983	1.34708	0.999777
catp-6	1.11098	0.999951	1.10987	0.999969	1.06903	0.999983	1.0725	0.999777
catp-7	1.17657	0.999951	1.14992	0.999969	0.849566	0.999983	0.876571	0.999777
catp-8	1.28553	0.999951	1.12389	0.999969	0.975394	0.999983	1.12227	0.999777
cav-2	0.880804	0.999951	1.10952	0.999969	2.05925	0.999983	1.66625	0.999777
cbd-1	0.946444	0.999951	1.38917	0.999969	1.42762	0.999983	0.970814	0.999777
cbl-1	1.76795	0.999951	1.00235	0.999969	0.915772	0.999983	1.61992	0.999777
cblc-1	0.403455	0.999951	0.30664	0.225899	0.847331	0.999983	1.11876	0.999777
cbn-1	1.3399	0.999951	0.814294	0.999969	0.689586	0.999983	1.14007	0.999777
cbp-1	0.9718	0.999951	1.17088	0.999969	0.970036	0.999983	0.808393	0.999777
cbp-2	1.03576	0.999951	2.22147	0.999969	1.00747	0.999983	0.472084	0.999777
cbp-3	1.10426	0.999951	2.42851	0.999969	0.994674	0.999983	0.454733	0.999777
cbs-1	4.87184	0.0986067	3.41232	0.0353359	0.986002	0.999983	1.42111	0.999777
cbs-2	2.25209	0.999951	1.25018	0.999969	0.643755	0.999983	1.14063	0.999777
CC8.2	0.676904	0.999951	0.966625	0.999969	1.17435	0.999983	0.825169	0.999777
cca-1	1.09237	0.999951	0.990392	0.999969	0.744882	0.999983	0.82742	0.999777
ccar-1	1.3237	0.999951	0.878217	0.999969	0.863699	0.999983	1.30631	0.999777
ccb-1	0.628436	0.999951	0.802793	0.999969	1.27614	0.999983	1.02171	0.999777
ccch-1	0.690091	0.999951	1.61668	0.999969	2.09573	0.999983	0.895223	0.999777
ccch-3	0.748367	0.999951	1.05282	0.999969	1.29443	0.999983	0.91924	0.999777
cccp-1	0.932095	0.999951	0.842243	0.999969	0.789074	0.999983	0.878381	0.999777
ccdc-47	0.989018	0.999951	1.03005	0.999969	1.07202	0.999983	1.03462	0.999777
ccdc-55	0.95942	0.999951	1.15607	0.999969	1.05363	0.999983	0.879531	0.999777
ccf-1	0.953693	0.999951	1.13684	0.999969	1.10625	0.999983	0.930898	0.999777
ccg-1	0.932959	0.999951	0.971007	0.999969	0.786274	0.999983	0.761054	0.999777
cchl-1	1.0923	0.999951	1.04617	0.999969	1.02174	0.999983	1.06984	0.999777
ccm-3	1.22609	0.999951	1.03436	0.999969	1.04723	0.999983	1.24696	0.999777
ccnk-1	0.919335	0.999951	1.10164	0.999969	1.02435	0.999983	0.856848	0.999777
ccpp-1	0.71217	0.999951	1.04141	0.999969	1.2813	0.999983	0.878879	0.999777
ccr-4	0.938085	0.999951	1.11686	0.999969	1.19862	0.999983	1.00976	0.999777
cct-1	0.986471	0.999951	0.862156	0.999969	1.1172	0.999983	1.28522	0.999777
cct-2	1.10671	0.999951	0.891859	0.999969	0.918642	0.999983	1.14431	0.999777
cct-3	1.11525	0.999951	0.933507	0.999969	0.949665	0.999983	1.13915	0.999777
cct-4	0.981805	0.999951	0.873878	0.999969	1.03818	0.999983	1.17327	0.999777
cct-5	1.05367	0.999951	0.968452	0.999969	1.0703	0.999983	1.17116	0.999777
cct-6	1.19105	0.999951	0.90872	0.999969	0.840675	0.999983	1.10474	0.999777
cct-7	0.970734	0.999951	0.877756	0.999969	1.09146	0.999983	1.21315	0.999777
cct-8	1.13615	0.999951	0.771307	0.999969	0.906006	0.999983	1.34214	0.999777
ccz-1	1.04325	0.999951	1.17159	0.999969	1.02925	0.999983	0.918882	0.999777
CD4.10	0.749855	0.999951	0.686777	0.999969	1.41042	0.999983	1.54667	0.999777
CD4.8	0.815888	0.999951	0.932959	0.999969	1.25734	0.999983	1.10204	0.999777
cdap-2	1.02549	0.999951	1.32774	0.999969	0.923862	0.999983	0.716826	0.999777
cdc-14	1.19053	0.999951	1.41091	0.999969	0.891594	0.999983	0.753611	0.999777
cdc-25.1	0.894743	0.999951	1.30912	0.999969	1.3245	0.999983	0.903536	0.999777
cdc-25.2	0.656833	0.999951	1.36944	0.999969	1.35295	0.999983	0.669137	0.999777
cdc-25.3	0.811578	0.999951	4.23942	0.999969	2.26083	0.999983	0.448877	0.999777
cdc-26	1.02682	0.999951	1.03635	0.999969	1.37281	0.999983	1.34714	0.999777
cdc-37	1.09145	0.999951	1.02462	0.999969	1.0104	0.999983	1.08133	0.999777
cdc-42	0.973571	0.999951	1.26573	0.999969	1.01508	0.999983	0.783224	0.999777
cdc-48.1	1.0469	0.999951	1.21399	0.999969	1.02393	0.999983	0.885645	0.999777
cdc-48.2	1.05185	0.999951	0.913215	0.999969	0.987504	0.999983	1.14158	0.999777
cdc-48.3	1.11004	0.999951	1.009	0.999969	1.01754	0.999983	1.12408	0.999777
cdc-5L	1.01958	0.999951	0.958254	0.999969	0.982077	0.999983	1.04877	0.999777
cdc-6	0.98858	0.999951	1.17128	0.999969	1.21128	0.999983	1.0248	0.999777
cdc-7	0.812173	0.999951	1.37671	0.999969	1.24851	0.999983	0.735001	0.999777
cdc-73	0.93664	0.999951	1.12948	0.999969	1.31267	0.999983	1.09228	0.999777
cdd-1	1.08856	0.999951	0.992948	0.999969	1.17317	0.999983	1.29531	0.999777
cdd-2	1.13306	0.999951	0.967536	0.999969	1.12634	0.999983	1.32882	0.999777
cdf-1	0.916447	0.999951	1.31169	0.999969	0.983762	0.999983	0.690435	0.999777
cdf-2	1.67349	0.999951	0.877466	0.999969	0.759502	0.999983	1.43946	0.999777
cdgs-1	0.981536	0.999951	0.990687	0.999969	0.84092	0.999983	0.835936	0.999777
cdh-1	1.17783	0.999951	1.16228	0.999969	0.667871	0.999983	0.688345	0.999777
cdh-10	1.03832	0.999951	0.624671	0.999969	0.615403	0.999983	1.02588	0.999777
cdh-12	1.75116	0.999951	1.05116	0.999969	0.705632	0.999983	1.18107	0.999777
cdh-4	1.03824	0.999951	1.18684	0.999969	0.712118	0.999983	0.628536	0.999777
cdh-5	1.05515	0.999951	0.60994	0.999969	0.996253	0.999983	1.75347	0.999777
cdh-7	1.15892	0.999951	0.491915	0.999969	0.868368	0.999983	2.09794	0.999777
cdh-8	2.81032	0.999951	1.18899	0.999969	0.310127	0.999983	0.726971	0.999777
cdh-9	0.93015	0.999951	0.632373	0.999969	0.963899	0.999983	1.40535	0.999777
cdk-1	0.821758	0.999951	1.18805	0.999969	1.3444	0.999983	0.931458	0.999777
cdk-11.1	0.969234	0.999951	1.04008	0.999969	0.999215	0.999983	0.934388	0.999777
cdk-11.2	1.15858	0.999951	1.28274	0.999969	0.998864	0.999983	0.905988	0.999777
cdk-12	1.17225	0.999951	1.03133	0.999969	1.03532	0.999983	1.18413	0.999777
cdk-4	1.09968	0.999951	1.23479	0.999969	0.871411	0.999983	0.780403	0.999777
cdk-5	1.09643	0.999951	1.06815	0.999969	0.973885	0.999983	1.00271	0.999777
cdk-7	0.855932	0.999951	1.05527	0.999969	1.11722	0.999983	0.902885	0.999777
cdk-8	1.13969	0.999951	1.23187	0.999969	0.921359	0.999983	0.852766	0.999777
cdk-9	0.799212	0.999951	0.823019	0.999969	0.999278	0.999983	0.976163	0.999777
cdka-1	0.768037	0.999951	0.710771	0.999969	0.699173	0.999983	0.759444	0.999777
cdkr-3	1.03494	0.999951	0.93909	0.999969	0.886895	0.999983	0.983411	0.999777
cdl-1	0.935684	0.999951	1.30686	0.999969	1.27942	0.999983	0.919641	0.999777
cdo-1	0.978391	0.999951	0.728491	0.999969	0.889585	0.999983	1.2001	0.999777
cdr-2	1.02248	0.999951	2.55584	0.871377	0.907581	0.999983	0.366837	0.593122
cdr-4	0.797558	0.999951	4.6121	0.0579359	0.934382	0.999983	0.163156	3.5122e-06
cdr-6	1.14491	0.999951	0.934043	0.999969	1.00527	0.999983	1.24043	0.999777
cdr-7	0.864507	0.999951	0.97492	0.999969	1.0236	0.999983	0.964505	0.999777
cdt-2	0.820725	0.999951	1.17583	0.999969	1.35783	0.999983	0.948999	0.999777
cebp-1	1.2464	0.999951	1.45204	0.999969	0.830089	0.999983	0.714513	0.999777
cebp-2	1.1589	0.999951	1.06513	0.999969	0.761064	0.999983	0.82946	0.999777
cec-1	1.01687	0.999951	1.0246	0.999969	0.819529	0.999983	0.819017	0.999777
cec-10	0.9969	0.999951	1.12844	0.999969	1.05482	0.999983	0.934645	0.999777
cec-2	0.926841	0.999951	1.68026	0.999969	1.60255	0.999983	0.876687	0.999777
cec-3	0.859212	0.999951	1.29722	0.999969	1.36237	0.999983	0.90539	0.999777
cec-4	0.842556	0.999951	0.864114	0.999969	0.876932	0.999983	0.859323	0.999777
cec-5	0.994166	0.999951	0.932044	0.999969	1.01082	0.999983	1.0811	0.999777
cec-6	1.10016	0.999951	1.17957	0.999969	1.05678	0.999983	0.985474	0.999777
cec-7	1.10965	0.999951	1.1848	0.999969	1.08601	0.999983	1.0146	0.999777
ced-1	1.40223	0.999951	1.79936	0.999969	0.823607	0.999983	0.650652	0.999777
ced-10	1.38585	0.999951	1.14623	0.999969	0.849798	0.999983	1.02996	0.999777
ced-12	0.575753	0.999951	0.861492	0.999969	1.12917	0.999983	0.757886	0.999777
ced-2	0.882148	0.999951	1.39703	0.999969	1.20957	0.999983	0.759946	0.999777
ced-3	0.971916	0.999951	1.87878	0.999969	1.41415	0.999983	0.729304	0.999777
ced-4	0.84191	0.999951	1.154	0.999969	1.17768	0.999983	0.859189	0.999777
ced-5	0.991176	0.999951	1.29795	0.999969	1.1569	0.999983	0.884795	0.999777
ced-6	1.00162	0.999951	1.19592	0.999969	0.895448	0.999983	0.758368	0.999777
ced-7	1.07834	0.999951	1.15086	0.999969	1.05414	0.999983	0.996122	0.999777
ced-9	0.997743	0.999951	1.45783	0.999969	1.24629	0.999983	0.854113	0.999777
cee-1	0.951597	0.999951	1.05443	0.999969	1.05604	0.999983	0.956377	0.999777
ceeh-2	0.76484	0.999951	1.14361	0.999969	1.03854	0.999983	0.711385	0.999777
ceh-100	1.0292	0.999951	1.17442	0.999969	1.13475	0.999983	0.998054	0.999777
ceh-13	0.873081	0.999951	0.785821	0.999969	0.815081	0.999983	0.911724	0.999777
ceh-18	0.926769	0.999951	0.821697	0.999969	1.08974	0.999983	1.2379	0.999777
ceh-20	0.956355	0.999951	1.02788	0.999969	0.830004	0.999983	0.780888	0.999777
ceh-21	1.06437	0.999951	2.34674	0.999969	1.17336	0.999983	0.532834	0.999777
ceh-27	0.916557	0.999951	0.847674	0.999969	0.849571	0.999983	0.92267	0.999777
ceh-30	1.87804	0.999951	0.878548	0.999969	0.50522	0.999983	1.09947	0.999777
ceh-31	1.14711	0.999951	0.742223	0.999969	0.641176	0.999983	0.998505	0.999777
ceh-32	0.909973	0.999951	0.997264	0.999969	0.998134	0.999983	0.921172	0.999777
ceh-34	0.726919	0.999951	0.625274	0.999969	1.00556	0.999983	1.18855	0.999777
ceh-37	0.813334	0.999951	0.946014	0.999969	0.979615	0.999983	0.85102	0.999777
ceh-38	0.934457	0.999951	1.16544	0.999969	0.992473	0.999983	0.797956	0.999777
ceh-41	1.17165	0.999951	1.27549	0.999969	0.770752	0.999983	0.715857	0.999777
ceh-43	0.810983	0.999951	0.969451	0.999969	0.789639	0.999983	0.671902	0.999777
ceh-44	1.06469	0.999951	1.07307	0.999969	1.03508	0.999983	1.03283	0.999777
ceh-48	0.894101	0.999951	1.10058	0.999969	0.848801	0.999983	0.69363	0.999777
ceh-58	0.880419	0.999951	0.988149	0.999969	0.963179	0.999983	0.859898	0.999777
ceh-6	0.700152	0.999951	0.749472	0.999969	0.804518	0.999983	0.751274	0.999777
ceh-60	0.895812	0.999951	1.08121	0.999969	1.10449	0.999983	0.91017	0.999777
ceh-62	1.43439	0.999951	2.13884	0.999969	0.613769	0.999983	0.421794	0.999777
ceh-79	1.31343	0.999951	1.17219	0.999969	0.777414	0.999983	0.875161	0.999777
ceh-88	1.48362	0.999951	1.36684	0.999969	0.692774	0.999983	0.756002	0.999777
ceh-89	0.779296	0.999951	0.708606	0.999969	0.993511	0.999983	1.10574	0.999777
ceh-92	0.835339	0.999951	0.868316	0.999969	1.3507	0.999983	1.30484	0.999777
cel-1	0.727669	0.999951	1.1546	0.999969	1.55414	0.999983	0.986375	0.999777
cep-1	1.68477	0.999951	0.963291	0.999969	0.568456	0.999983	0.986245	0.999777
cept-1	0.764328	0.999951	1.69222	0.999969	1.14993	0.999983	0.521887	0.999777
cept-2	0.884493	0.999951	1.40207	0.999969	1.2553	0.999983	0.793038	0.999777
cerk-1	1.0274	0.999951	1.03057	0.999969	0.983614	0.999983	0.98668	0.999777
cest-1.2	1.14011	0.999951	0.827489	0.999969	1.11378	0.999983	1.52119	0.999777
cest-10	1.3713	0.999951	0.644838	0.999969	1.08339	0.999983	2.19476	0.999777
cest-13	1.44228	0.999951	0.509789	0.999969	0.677626	0.999983	1.92964	0.999777
cest-15	0.851341	0.999951	0.855471	0.999969	1.05514	0.999983	1.06362	0.999777
cest-16	1.29548	0.999951	0.865556	0.999969	0.80315	0.999983	1.20543	0.999777
cest-17	0.695238	0.999951	0.686375	0.999969	1.32756	0.999983	1.35475	0.999777
cest-2.1	1.11939	0.999951	0.932288	0.999969	1.4086	0.999983	1.67276	0.999777
cest-2.2	1.23294	0.999951	0.723922	0.999969	0.925083	0.999983	1.5766	0.999777
cest-24	0.566481	0.999951	1.76388	0.999969	1.50067	0.999983	0.483283	0.999777
cest-25	1.24846	0.999951	1.9822	0.999969	0.905661	0.999983	0.568691	0.999777
cest-26	1.0675	0.999951	1.67766	0.999969	0.912013	0.999983	0.58381	0.999777
cest-27	0.932978	0.999951	1.13357	0.999969	0.764214	0.999983	0.625072	0.999777
cest-3	1.62781	0.999951	0.573412	0.999969	0.93399	0.999983	2.63722	0.999777
cest-31	1.31275	0.999951	0.928907	0.999969	1.13021	0.999983	1.60206	0.999777
cest-32	0.919383	0.999951	2.26256	0.999969	1.32394	0.999983	0.54386	0.999777
cest-33	1.46539	0.999951	0.986334	0.999969	0.570832	0.999983	0.854795	0.999777
cest-35.1	1.24838	0.999951	1.31648	0.999969	0.859906	0.999983	0.825728	0.999777
cest-4	0.696617	0.999951	0.896525	0.999969	1.01797	0.999983	0.795852	0.999777
cest-5.2	1.1874	0.999951	0.709566	0.999969	0.78445	0.999983	1.30508	0.999777
cest-6	1.06547	0.999951	0.561625	0.999969	0.849377	0.999983	1.63853	0.999777
cest-9.1	0.989328	0.999951	0.318091	0.999969	1.00408	0.999983	3.15115	0.15998
cex-1	1.14704	0.999951	2.27976	0.999969	1.25096	0.999983	0.622622	0.999777
cex-2	1.04658	0.999951	0.834085	0.999969	0.638523	0.999983	0.806028	0.999777
cey-1	1.02844	0.999951	0.797114	0.999969	0.837785	0.999983	1.08748	0.999777
cey-2	0.918317	0.999951	1.37809	0.999969	1.28958	0.999983	0.858338	0.999777
cey-3	0.803549	0.999951	0.964906	0.999969	1.28448	0.999983	1.07011	0.999777
cey-4	1.03166	0.999951	0.989182	0.999969	1.09307	0.999983	1.14562	0.999777
cfim-1	0.961234	0.999951	1.13133	0.999969	1.1168	0.999983	0.951117	0.999777
cfim-2	1.05824	0.999951	1.48804	0.999969	1.15811	0.999983	0.821515	0.999777
cfp-1	0.880922	0.999951	1.29247	0.999969	1.24077	0.999983	0.847371	0.999777
cgef-1	0.98266	0.999951	0.85908	0.999969	0.876747	0.999983	1.00628	0.999777
cgh-1	0.889372	0.999951	0.943756	0.999969	1.04047	0.999983	0.983344	0.999777
cgp-1	1.15042	0.999951	1.3679	0.999969	1.15137	0.999983	0.96843	0.999777
cgr-1	0.85257	0.999951	0.799495	0.999969	1.21102	0.999983	1.30094	0.999777
cgt-1	0.922378	0.999951	1.68365	0.999969	1.48641	0.999983	0.812872	0.999777
cgt-2	0.717972	0.999951	0.747247	0.999969	1.01102	0.999983	0.961548	0.999777
cgt-3	0.73663	0.999951	1.27894	0.999969	1.25899	0.999983	0.728975	0.999777
chaf-1	0.682096	0.999951	1.0573	0.999969	1.48485	0.999983	0.960056	0.999777
chaf-2	1.15532	0.999951	1.33334	0.999969	1.04161	0.999983	0.904714	0.999777
chat-1	0.872791	0.999951	1.10568	0.999969	0.922471	0.999983	0.727963	0.999777
chc-1	1.27014	0.999951	1.0675	0.999969	0.840551	0.999983	1.00308	0.999777
chch-3	1.08432	0.999951	0.947189	0.999969	0.912815	0.999983	1.04872	0.999777
chd-1	0.864289	0.999951	1.11274	0.999969	1.12588	0.999983	0.877073	0.999777
chd-3	0.834904	0.999951	0.970134	0.999969	1.10965	0.999983	0.965203	0.999777
chd-7	1.13223	0.999951	1.02628	0.999969	0.740308	0.999983	0.823487	0.999777
chdp-1	0.843555	0.999951	1.06698	0.999969	1.26784	0.999983	1.00762	0.999777
che-10	1.33692	0.999951	0.933681	0.999969	0.861556	0.999983	1.22255	0.999777
che-14	1.28529	0.999951	0.777471	0.999969	0.730899	0.999983	1.21833	0.999777
chil-10	1.09369	0.999951	1.04817	0.999969	0.690929	0.999983	0.726685	0.999777
chil-13	0.752205	0.999951	1.23523	0.999969	1.30375	0.999983	0.802591	0.999777
chil-15	0.356363	0.999951	0.262739	0.574969	1.05	0.999983	1.42882	0.999777
chil-19	0.96629	0.999951	0.582705	0.999969	0.752237	0.999983	1.27792	0.999777
chil-21	0.96629	0.999951	0.591329	0.999969	0.752237	0.999983	1.25927	0.999777
chil-22	1.36308	0.999951	1.27513	0.999969	1.00068	0.999983	1.08106	0.999777
chil-23	1.29139	0.999951	0.593289	0.999969	1.08025	0.999983	2.28231	0.999777
chil-24	0.823786	0.999951	1.94958	0.999969	1.22956	0.999983	0.523686	0.999777
chin-1	1.1835	0.999951	1.30302	0.999969	1.08061	0.999983	0.982263	0.999777
chk-1	1.25569	0.999951	1.44001	0.999969	0.917764	0.999983	0.798895	0.999777
chk-2	1.15667	0.999951	0.700384	0.999969	0.843827	0.999983	1.38088	0.999777
chl-1	0.927343	0.999951	1.11179	0.999969	0.957951	0.999983	0.800848	0.999777
chmp-7	1.23808	0.999951	1.2803	0.999969	0.932308	0.999983	0.902244	0.999777
chn-1	0.929055	0.999951	1.18968	0.999969	1.08112	0.999983	0.846853	0.999777
cho-1	0.45557	0.999951	0.852196	0.999969	1.72719	0.999983	0.936799	0.999777
chp-1	0.950748	0.999951	0.875737	0.999969	1.077	0.999983	1.17339	0.999777
chpf-1	1.07844	0.999951	1.13822	0.999969	0.81111	0.999983	0.770631	0.999777
chs-1	0.481112	0.999951	1.7769	0.999969	3.11745	0.999983	0.835203	0.999777
chs-2	1.3883	0.999951	0.665607	0.999969	0.873781	0.999983	1.8045	0.999777
cht-1	1.37619	0.999951	0.938318	0.999969	0.585838	0.999983	0.864997	0.999777
cht-4	0.812305	0.999951	0.506377	0.999969	1.57509	0.999983	2.42483	0.999777
chtl-1	1.07125	0.999951	1.44091	0.999969	0.995256	0.999983	0.73623	0.999777
chup-1	0.892723	0.999951	1.20251	0.999969	1.19649	0.999983	0.897725	0.999777
chw-1	0.943775	0.999951	0.80845	0.999969	0.910557	0.999983	1.06872	0.999777
cic-1	0.890919	0.999951	0.968293	0.999969	1.01614	0.999983	0.935646	0.999777
cid-1	1.16538	0.999951	1.0147	0.999969	1.07101	0.999983	1.23852	0.999777
cids-1	0.927865	0.999951	1.14316	0.999969	1.03097	0.999983	0.838113	0.999777
cids-2	0.996392	0.999951	1.15123	0.999969	1.17322	0.999983	1.01754	0.999777
cif-1	1.05161	0.999951	0.841565	0.999969	0.965664	0.999983	1.2132	0.999777
cil-1	1.23137	0.999951	1.53874	0.999969	1.12687	0.999983	0.902448	0.999777
cima-1	0.961724	0.999951	0.764445	0.999969	1.20642	0.999983	1.54058	0.999777
cin-4	0.580992	0.999951	1.36232	0.999969	1.88082	0.999983	0.802284	0.999777
cir-1	1.09622	0.999951	1.20693	0.999969	0.961495	0.999983	0.874806	0.999777
cisd-1	1.27122	0.999951	0.966657	0.999969	1.03886	0.999983	1.37385	0.999777
cisd-3.1	0.919219	0.999951	0.740953	0.999969	1.01944	0.999983	1.27094	0.999777
cisd-3.2	0.987119	0.999951	0.822013	0.999969	1.03117	0.999983	1.2463	0.999777
cit-1.1	0.923285	0.999951	1.01381	0.999969	1.22837	0.999983	1.1244	0.999777
cit-1.2	1.07794	0.999951	1.05419	0.999969	0.921635	0.999983	0.946466	0.999777
cka-1	0.830888	0.999951	1.30758	0.999969	1.23341	0.999983	0.787012	0.999777
cka-2	0.559102	0.999951	0.725985	0.999969	1.75205	0.999983	1.36998	0.999777
ckb-1	1.09214	0.999951	1.01969	0.999969	0.868097	0.999983	0.936375	0.999777
ckb-2	1.42161	0.999951	3.14838	0.0533781	0.654054	0.999983	0.296304	0.0151389
ckb-4	1.03118	0.999951	1.29568	0.999969	0.836914	0.999983	0.67542	0.999777
ckc-1	1.02911	0.999951	0.732905	0.999969	0.79178	0.999983	1.11586	0.999777
cki-1	0.753609	0.999951	0.995692	0.999969	0.960893	0.999983	0.732257	0.999777
cki-2	0.890362	0.999951	1.3072	0.999969	1.28921	0.999983	0.880155	0.999777
ckk-1	0.725466	0.999951	0.827486	0.999969	0.841051	0.999983	0.74774	0.999777
ckr-2	0.684966	0.999951	0.911463	0.999969	1.24392	0.999983	0.945176	0.999777
cks-1	0.880443	0.999951	1.25228	0.999969	1.33332	0.999983	0.939695	0.999777
cku-70	1.00652	0.999951	1.21548	0.999969	1.13047	0.999983	0.935862	0.999777
cku-80	1.14916	0.999951	1.26551	0.999969	0.801802	0.999983	0.721108	0.999777
cla-1	0.899271	0.999951	1.01148	0.999969	0.821006	0.999983	0.739795	0.999777
clc-1	0.720719	0.999951	1.44377	0.999969	1.48829	0.999983	0.745105	0.999777
clc-2	0.972433	0.999951	1.28404	0.999969	0.720852	0.999983	0.578923	0.999777
clc-3	1.0573	0.999951	1.02883	0.999969	0.87175	0.999983	0.905376	0.999777
clc-5	0.991371	0.999951	0.81807	0.999969	0.501025	0.999983	0.634079	0.999777
cld-9	1.41961	0.999951	1.09879	0.999969	0.830735	0.999983	1.08181	0.999777
cle-1	1.2013	0.999951	1.76708	0.999969	1.14801	0.999983	0.780866	0.999777
clec-1	1.22179	0.999951	0.702013	0.999969	0.794443	0.999983	1.38995	0.999777
clec-10	1.37571	0.999951	1.73397	0.999969	1.47865	0.999983	1.1757	0.999777
clec-117	1.07315	0.999951	0.786	0.999969	0.855953	0.999983	1.13692	0.999777
clec-119	0.992851	0.999951	0.587848	0.999969	0.845947	0.999983	1.4233	0.999777
clec-123	1.05574	0.999951	0.82956	0.999969	0.820101	0.999983	1.03296	0.999777
clec-146	1.59866	0.999951	1.84482	0.999969	0.539147	0.999983	0.479439	0.999777
clec-149	1.0626	0.999951	1.03088	0.999969	0.788833	0.999983	0.817979	0.999777
clec-150	1.11009	0.999951	0.870801	0.999969	1.00566	0.999983	1.28768	0.999777
clec-151	0.509557	0.999951	0.657746	0.999969	1.82387	0.999983	1.40354	0.999777
clec-153	0.648269	0.999951	0.878233	0.999969	1.74749	0.999983	1.25531	0.999777
clec-160	0.714286	0.999951	0.710895	0.999969	1.05268	0.999983	1.07283	0.999777
clec-166	1.15801	0.999951	0.708194	0.999969	0.810561	0.999983	1.34699	0.999777
clec-169	1.07626	0.999951	0.0254704	0.000180239	0.0416965	0.999983	1.78104	0.999777
clec-170	0.555911	0.999951	0.384113	0.999969	1.35389	0.999983	1.97425	0.999777
clec-180	1.68954	0.999951	1.18009	0.999969	0.571547	0.999983	0.824471	0.999777
clec-186	1.32514	0.999951	0.887928	0.999969	0.973223	0.999983	1.46326	0.999777
clec-187	1.55944	0.999951	1.02101	0.999969	0.697446	0.999983	1.07939	0.999777
clec-205	0.952402	0.999951	1.7102	0.999969	0.942585	0.999983	0.526513	0.999777
clec-209	4.68091	0.999951	11.3998	3.94878e-06	2.81389	0.999983	1.16201	0.999777
clec-210	1.11253	0.999951	0.225322	0.239842	0.408083	0.999983	2.05549	0.999777
clec-218	0.759609	0.999951	1.10909	0.999969	0.962762	0.999983	0.652436	0.999777
clec-223	2.96806	0.999951	4.39076	0.999969	0.56407	0.999983	0.367689	0.999777
clec-229	0.609058	0.999951	1.25762	0.999969	1.32287	0.999983	0.59635	0.999777
clec-230	0.370195	0.999951	1.27765	0.999969	0.936145	0.999983	0.266247	0.999777
clec-246	2.06082	0.999951	0.599092	0.999969	0.458364	0.999983	1.5051	0.999777
clec-247	1.12291	0.999951	0.499656	0.999969	0.931094	0.999983	1.98331	0.999777
clec-265	0.704518	0.999951	1.55897	0.999969	1.74521	0.999983	0.797214	0.999777
clec-41	1.07597	0.999951	1.00799	0.999969	1.34685	0.999983	1.44271	0.999777
clec-47	0.0203763	1.74127e-18	0.0484404	8.30816e-10	2.17493	0.999983	0.920334	0.999777
clec-48	0.509979	0.999951	0.852284	0.999969	1.03465	0.999983	0.620124	0.999777
clec-49	1.45235	0.999951	1.27997	0.999969	0.74492	0.999983	0.848148	0.999777
clec-5	0.157015	0.0752854	0.340251	0.5692	2.17514	0.999983	1.00863	0.999777
clec-50	1.34754	0.999951	1.24612	0.999969	0.926445	0.999983	1.0057	0.999777
clec-51	1.23124	0.999951	0.836241	0.999969	1.01547	0.999983	1.49809	0.999777
clec-54	0.656553	0.999951	0.88089	0.999969	1.56956	0.999983	1.18517	0.999777
clec-56	1.55802	0.999951	1.13917	0.999969	0.880659	0.999983	1.21109	0.999777
clec-57	0.809073	0.999951	0.51902	0.999969	0.931941	0.999983	1.46005	0.999777
clec-6	0.666688	0.999951	0.052524	0.0135226	0.0912302	0.285592	1.18406	0.999777
clec-62	0.852164	0.999951	0.879162	0.999969	0.957309	0.999983	0.933923	0.999777
[truncated: 9,535 more rows]
